# Supplementary material
Source: publisher figshare collection journal article supplement (https://acs.figshare.com/ndownloader/files/10149402)
Supplement: Supplementary file 1 [file 10149402]

data_vv153

_publ_contact_author_name       'D. Didier'
_publ_contact_author_address
;
Department Chemie
Ludwig-Maximilians Universit\"at
Butenandtstra\&se 5-13 (Haus F)
D-81377 M\"unchen
Bundesrepublik Deutschland
;

loop_
 _publ_author_name
 _publ_author_address
'A. Music'
;
Department Chemie
Ludwig-Maximilians Universit\"at
Butenandtstra\&se 5-13 (Haus F)
D-81377 M\"unchen
Bundesrepublik Deutschland
;
'A. N. Baumann'
;
Department Chemie
Ludwig-Maximilians Universit\"at
Butenandtstra\&se 5-13 (Haus F)
D-81377 M\"unchen
Bundesrepublik Deutschland
;
'D. Didier'
;
Department Chemie
Ludwig-Maximilians Universit\"at
Butenandtstra\&se 5-13 (Haus F)
D-81377 M\"unchen
Bundesrepublik Deutschland
;

_publ_contact_author_email 'dorian.didier@cup.uni-muenchen.de'
_publ_contact_author_fax   '+49 089-2180-77681'
_publ_contact_author_phone ?


_publ_requested_journal 'Org. Lett.'
_publ_section_title     
;
Simple, Efficient and Stereoselective Route toward Fused 3-Alkylideneazetidines
;
_publ_section_abstract  ?
_publ_section_comment   ?

_audit_update_record               03-Mar-17

_chemical_name_common                   AMUS127
_chemical_compound_source          ?
_chemical_absolute_configuration   ?

_exptl_crystal_description              block
_exptl_crystal_colour                   colourless
_exptl_crystal_size_max                 0.100 #?# in millimeters
_exptl_crystal_size_mid                 0.100 #?# in millimeters
_exptl_crystal_size_min                 0.090 #?# in millimeters
_exptl_crystal_density_method           'not measured'
_exptl_crystal_density_meas       ?
_exptl_special_details 
;
;

_audit_author_name                'P. Mayer' #?# X-ray operator
_audit_creation_date              ? #?# style: 18-Aug-1998

_diffrn_ambient_temperature             100.(2) #?# in K
_diffrn_source_type               'Bruker TXS'
_diffrn_source_power              2.5 #?# in kW
_diffrn_source_voltage            50 #?# in kV
_diffrn_source_current            50 #?# in mA
_diffrn_radiation_wavelength      0.71073
_diffrn_radiation_type            MoK\a
_diffrn_source                    'rotating anode (TXS)'
_diffrn_radiation_monochromator   'focusing mirrors'
_diffrn_radiation_collimation     ?
_diffrn_measurement_device        'fixed-chi three-circle diffractometer'
_diffrn_measurement_device_type   'Bruker D8 Venture TXS'
_diffrn_measurement_method        'mix of phi and omega scans'
_diffrn_measurement_details       ?
_diffrn_detector_area_resol_mean        7.4074

_diffrn_special_details            ?
_diffrn_orient_matrix_type        ?
_diffrn_orient_matrix_UB_11       ?
_diffrn_orient_matrix_UB_12       ?
_diffrn_orient_matrix_UB_13       ?
_diffrn_orient_matrix_UB_21       ?
_diffrn_orient_matrix_UB_22       ?
_diffrn_orient_matrix_UB_23       ?
_diffrn_orient_matrix_UB_31       ?
_diffrn_orient_matrix_UB_32       ?
_diffrn_orient_matrix_UB_33       ?

_cell_length_a                          7.4167(3)
_cell_length_b                          10.5318(5)
_cell_length_c                          13.8110(6)
_cell_angle_alpha                       99.828(2)
_cell_angle_beta                        102.1360(10)
_cell_angle_gamma                       93.865(2)
_cell_volume                            1033.21(8)
_cell_measurement_temperature           100.(2) #?# in K
_cell_measurement_reflns_used           5592
_cell_measurement_theta_min             2.7217
_cell_measurement_theta_max             26.3832
_cell_special_details             ?

_exptl_absorpt_coefficient_mu           0.087
_exptl_absorpt_correction_type          Multi-Scan
_exptl_absorpt_correction_T_min         0.9121
_exptl_absorpt_correction_T_max         0.9705
_shelx_estimated_absorpt_T_min    0.991
_shelx_estimated_absorpt_T_max    0.992
_exptl_absorpt_process_details 
;
SADABS-2016/2 - Bruker AXS area detector scaling and absorption correction
;

_diffrn_reflns_number             12376 #xl
_diffrn_reflns_av_R_equivalents   0.0398 #xl
_diffrn_reflns_av_unetI/netI      0.0472 #xl
_diffrn_reflns_limit_h_min        -9 #xl
_diffrn_reflns_limit_h_max        9 #xl
_diffrn_reflns_limit_k_min        -13 #xl
_diffrn_reflns_limit_k_max        11 #xl
_diffrn_reflns_limit_l_min        -17 #xl
_diffrn_reflns_limit_l_max        17 #xl
_diffrn_reflns_theta_min          3.269 #xl
_diffrn_reflns_theta_max          26.372 #xl
_diffrn_measured_fraction_theta_max   0.994 #xl
_diffrn_reflns_theta_full         25.242 #xl
_diffrn_measured_fraction_theta_full  0.996 #xl
_diffrn_reflns_Laue_measured_fraction_max    0.994 #xl
_diffrn_reflns_Laue_measured_fraction_full   0.996 #xl
_diffrn_reflns_point_group_measured_fraction_max   0.994 #xl
_diffrn_reflns_point_group_measured_fraction_full  0.996 #xl

_space_group_crystal_system             triclinic
_space_group_name_H-M_alt               'P -1'
_space_group_name_Hall                  '-P 1'
_space_group_IT_number            2

_shelx_space_group_comment 
;
The symmetry employed for this shelxl refinement is uniquely defined
by the following loop, which should always be used as a source of
symmetry information in preference to the above space-group names.
They are only intended as comments.
;

loop_
 _space_group_symop_operation_xyz
'x, y, z'
'-x, -y, -z'

loop_
 _atom_type_symbol
 _atom_type_description
 _atom_type_scat_dispersion_real
 _atom_type_scat_dispersion_imag
 _atom_type_scat_source
 'C'  'C'   0.0033   0.0016
 'International Tables Vol C Tables 4.2.6.8 and 6.1.1.4'
 'H'  'H'   0.0000   0.0000
 'International Tables Vol C Tables 4.2.6.8 and 6.1.1.4'
 'N'  'N'   0.0061   0.0033
 'International Tables Vol C Tables 4.2.6.8 and 6.1.1.4'
 'O'  'O'   0.0106   0.0060
 'International Tables Vol C Tables 4.2.6.8 and 6.1.1.4'

_reflns_number_total              4205 #xl
_reflns_number_gt                 3302 #xl
_reflns_threshold_expression      'I > 2\s(I)' #xl
_reflns_Friedel_coverage          0.000 #xl
_reflns_Friedel_fraction_max      . #xl
_reflns_Friedel_fraction_full     . #xl
_reflns_special_details 
;
 Reflections were merged by SHELXL according to the crystal
 class for the calculation of statistics and refinement.

 _reflns_Friedel_fraction is defined as the number of unique
 Friedel pairs measured divided by the number that would be
 possible theoretically, ignoring centric projections and
 systematic absences.
;

_refine_ls_structure_factor_coef  Fsqd #xl
_refine_ls_matrix_type            full #xl
_refine_ls_weighting_scheme       calc #xl
_refine_ls_weighting_details 
'w=1/[\s^2^(Fo^2^)+(0.0312P)^2^+0.3906P] where P=(Fo^2^+2Fc^2^)/3' #xl
_atom_sites_solution_primary      ?
_atom_sites_solution_secondary    ?
_atom_sites_solution_hydrogens          mixed
_refine_ls_hydrogen_treatment           mixed #?#
_refine_ls_extinction_method      none #xl
_refine_ls_extinction_coef        . #xl
_refine_ls_abs_structure_details  ? #xl
_refine_ls_abs_structure_Flack    ? #xl
_refine_ls_number_reflns          4205 #xl
_refine_ls_number_parameters      255 #xl
_refine_ls_number_restraints      0 #xl
_refine_ls_R_factor_all           0.0583 #xl
_refine_ls_R_factor_gt            0.0408 #xl
_refine_ls_wR_factor_ref          0.0984 #xl
_refine_ls_wR_factor_gt           0.0874 #xl
_refine_ls_goodness_of_fit_ref    1.037 #xl
_refine_ls_restrained_S_all       1.037 #xl
_refine_ls_shift/su_max           0.000 #xl
_refine_ls_shift/su_mean          0.000 #xl
_refine_diff_density_max    0.255 #xl
_refine_diff_density_min   -0.241 #xl
_refine_diff_density_rms    0.043 #xl

_refine_special_details 
;
H(C) constr
H(O) refall
;

_computing_data_collection     'APEX3 v2016.5-0, Bruker AXS (2016)'
_computing_cell_refinement              'SAINT V8.37A (Bruker AXS Inc., 2015)'
_computing_data_reduction               'SAINT V8.37A (Bruker AXS Inc., 2015)'
_computing_structure_solution           'XT, VERSION 2014/5'

_computing_structure_refinement         'SHELXL-2014/7 (Sheldrick, 2014)'

_computing_molecular_graphics           'shelXle (C.B. Huebschle, rev 786)'

_computing_publication_material  ?

loop_
 _atom_site_label
 _atom_site_type_symbol
 _atom_site_fract_x
 _atom_site_fract_y
 _atom_site_fract_z
 _atom_site_U_iso_or_equiv
 _atom_site_adp_type
 _atom_site_occupancy
 _atom_site_site_symmetry_order
 _atom_site_calc_flag
 _atom_site_refinement_flags_posn
 _atom_site_refinement_flags_adp
 _atom_site_refinement_flags_occupancy
 _atom_site_disorder_assembly
 _atom_site_disorder_group
O1 O 0.57923(13) 0.32831(9) 0.19315(8) 0.0207(2) Uani 1 1 d . . . . .
O2 O 0.89194(14) 0.38683(10) 0.22169(8) 0.0247(3) Uani 1 1 d . . . . .
O3 O 0.78430(14) 0.45411(10) 0.43142(8) 0.0245(3) Uani 1 1 d . . . . .
O4 O 0.81067(16) 0.85543(11) 0.62156(8) 0.0320(3) Uani 1 1 d . . . . .
O5 O 1.08691(14) 0.62514(12) 0.22733(8) 0.0256(3) Uani 1 1 d . . . . .
H5 H 1.034(3) 0.543(2) 0.2175(16) 0.056(7) Uiso 1 1 d . . . . .
N1 N 0.68770(16) 0.53532(12) 0.23411(9) 0.0182(3) Uani 1 1 d . . . . .
N2 N 0.77670(16) 0.64400(12) 0.53944(9) 0.0203(3) Uani 1 1 d . . . . .
C1 C 0.7321(2) 0.41324(14) 0.21729(11) 0.0191(3) Uani 1 1 d . . . . .
C2 C 0.50958(19) 0.59219(14) 0.22879(11) 0.0185(3) Uani 1 1 d . . . . .
H2A H 0.4255 0.5531 0.2652 0.022 Uiso 1 1 calc R U . . .
H2B H 0.4438 0.5980 0.1597 0.022 Uiso 1 1 calc R U . . .
C3 C 0.62493(19) 0.71694(14) 0.28833(11) 0.0173(3) Uani 1 1 d . . . . .
C4 C 0.80504(19) 0.65608(14) 0.28827(11) 0.0178(3) Uani 1 1 d . . . . .
C5 C 0.90753(19) 0.66207(14) 0.39978(11) 0.0181(3) Uani 1 1 d . . . . .
H5A H 1.0380 0.6419 0.4017 0.022 Uiso 1 1 calc R U . . .
C6 C 0.81609(19) 0.57113(14) 0.45438(11) 0.0188(3) Uani 1 1 d . . . . .
C7 C 0.8306(2) 0.77452(15) 0.55195(11) 0.0222(3) Uani 1 1 d . . . . .
C8 C 0.91071(19) 0.79893(14) 0.46356(11) 0.0200(3) Uani 1 1 d . . . . .
H8 H 1.0421 0.8389 0.4891 0.024 Uiso 1 1 calc R U . . .
C9 C 0.7936(2) 0.89534(14) 0.41159(12) 0.0215(3) Uani 1 1 d . . . . .
H9A H 0.7709 0.9660 0.4634 0.026 Uiso 1 1 calc R U . . .
H9B H 0.8627 0.9343 0.3679 0.026 Uiso 1 1 calc R U . . .
C10 C 0.60932(19) 0.82559(14) 0.34839(11) 0.0192(3) Uani 1 1 d . . . . .
C11 C 0.94249(19) 0.70809(15) 0.23142(11) 0.0211(3) Uani 1 1 d . . . . .
H11 H 1.0038 0.7925 0.2743 0.025 Uiso 1 1 calc R U . . .
C12 C 0.8590(2) 0.73868(16) 0.12685(12) 0.0264(4) Uani 1 1 d . . . . .
H12 H 0.7494 0.7873 0.1329 0.032 Uiso 1 1 calc R U . . .
C13 C 0.7936(3) 0.61913(19) 0.04340(13) 0.0389(4) Uani 1 1 d . . . . .
H13A H 0.7527 0.6464 -0.0214 0.058 Uiso 1 1 calc R U . . .
H13B H 0.6901 0.5686 0.0581 0.058 Uiso 1 1 calc R U . . .
H13C H 0.8961 0.5657 0.0400 0.058 Uiso 1 1 calc R U . . .
C14 C 1.0044(3) 0.8286(2) 0.09978(15) 0.0471(5) Uani 1 1 d . . . . .
H14A H 0.9526 0.8527 0.0349 0.071 Uiso 1 1 calc R U . . .
H14B H 1.1146 0.7838 0.0949 0.071 Uiso 1 1 calc R U . . .
H14C H 1.0388 0.9070 0.1522 0.071 Uiso 1 1 calc R U . . .
C15 C 0.5933(2) 0.18744(14) 0.17100(12) 0.0235(3) Uani 1 1 d . . . . .
C16 C 0.7130(3) 0.14554(17) 0.26094(14) 0.0384(4) Uani 1 1 d . . . . .
H16A H 0.7019 0.0507 0.2505 0.058 Uiso 1 1 calc R U . . .
H16B H 0.6716 0.1801 0.3222 0.058 Uiso 1 1 calc R U . . .
H16C H 0.8427 0.1788 0.2682 0.058 Uiso 1 1 calc R U . . .
C17 C 0.3937(2) 0.13015(16) 0.15438(13) 0.0290(4) Uani 1 1 d . . . . .
H17A H 0.3869 0.0354 0.1396 0.044 Uiso 1 1 calc R U . . .
H17B H 0.3174 0.1602 0.0975 0.044 Uiso 1 1 calc R U . . .
H17C H 0.3476 0.1579 0.2153 0.044 Uiso 1 1 calc R U . . .
C18 C 0.6668(3) 0.15442(17) 0.07636(14) 0.0382(4) Uani 1 1 d . . . . .
H18A H 0.6643 0.0602 0.0577 0.057 Uiso 1 1 calc R U . . .
H18B H 0.7946 0.1947 0.0889 0.057 Uiso 1 1 calc R U . . .
H18C H 0.5891 0.1870 0.0213 0.057 Uiso 1 1 calc R U . . .
C19 C 0.6956(2) 0.58819(17) 0.61228(12) 0.0270(4) Uani 1 1 d . . . . .
H19A H 0.7787 0.6129 0.6793 0.040 Uiso 1 1 calc R U . . .
H19B H 0.6782 0.4935 0.5923 0.040 Uiso 1 1 calc R U . . .
H19C H 0.5753 0.6206 0.6142 0.040 Uiso 1 1 calc R U . . .
C20 C 0.4305(2) 0.87433(16) 0.36376(13) 0.0274(4) Uani 1 1 d . . . . .
H20A H 0.4246 0.9611 0.3474 0.041 Uiso 1 1 calc R U . . .
H20B H 0.4236 0.8783 0.4343 0.041 Uiso 1 1 calc R U . . .
H20C H 0.3264 0.8155 0.3197 0.041 Uiso 1 1 calc R U . . .

loop_
 _atom_site_aniso_label
 _atom_site_aniso_U_11
 _atom_site_aniso_U_22
 _atom_site_aniso_U_33
 _atom_site_aniso_U_23
 _atom_site_aniso_U_13
 _atom_site_aniso_U_12
O1 0.0181(5) 0.0148(5) 0.0263(6) -0.0002(4) 0.0016(4) 0.0014(4)
O2 0.0178(5) 0.0227(6) 0.0319(6) 0.0007(5) 0.0043(4) 0.0058(4)
O3 0.0262(6) 0.0179(6) 0.0269(6) 0.0041(5) 0.0015(5) -0.0007(4)
O4 0.0387(7) 0.0293(7) 0.0256(6) -0.0018(5) 0.0051(5) 0.0110(5)
O5 0.0147(5) 0.0296(7) 0.0343(6) 0.0064(5) 0.0079(5) 0.0063(5)
N1 0.0126(6) 0.0153(6) 0.0240(7) 0.0002(5) 0.0010(5) 0.0015(5)
N2 0.0181(6) 0.0219(7) 0.0207(6) 0.0038(5) 0.0033(5) 0.0038(5)
C1 0.0190(7) 0.0198(8) 0.0164(7) 0.0013(6) 0.0013(6) 0.0021(6)
C2 0.0133(7) 0.0190(8) 0.0225(8) 0.0032(6) 0.0023(6) 0.0037(6)
C3 0.0123(7) 0.0189(8) 0.0213(7) 0.0068(6) 0.0026(6) 0.0013(6)
C4 0.0143(7) 0.0155(7) 0.0226(8) 0.0019(6) 0.0032(6) 0.0017(6)
C5 0.0122(7) 0.0176(7) 0.0230(8) 0.0035(6) 0.0012(6) 0.0017(5)
C6 0.0121(7) 0.0207(8) 0.0213(7) 0.0046(6) -0.0019(6) 0.0016(6)
C7 0.0173(7) 0.0232(8) 0.0229(8) 0.0025(6) -0.0019(6) 0.0060(6)
C8 0.0137(7) 0.0185(8) 0.0246(8) 0.0014(6) -0.0004(6) 0.0000(6)
C9 0.0202(8) 0.0155(8) 0.0270(8) 0.0021(6) 0.0031(6) 0.0012(6)
C10 0.0159(7) 0.0169(8) 0.0247(8) 0.0054(6) 0.0033(6) 0.0024(6)
C11 0.0144(7) 0.0233(8) 0.0263(8) 0.0051(6) 0.0057(6) 0.0032(6)
C12 0.0196(8) 0.0336(9) 0.0283(9) 0.0111(7) 0.0067(6) 0.0027(7)
C13 0.0433(11) 0.0481(12) 0.0250(9) 0.0060(8) 0.0063(8) 0.0100(9)
C14 0.0313(10) 0.0716(15) 0.0428(11) 0.0319(11) 0.0053(8) -0.0076(10)
C15 0.0274(8) 0.0137(8) 0.0263(8) -0.0009(6) 0.0029(6) 0.0032(6)
C16 0.0401(10) 0.0257(10) 0.0444(11) 0.0109(8) -0.0045(8) 0.0021(8)
C17 0.0310(9) 0.0202(8) 0.0323(9) 0.0003(7) 0.0047(7) -0.0032(7)
C18 0.0430(11) 0.0291(10) 0.0391(10) -0.0096(8) 0.0168(8) -0.0040(8)
C19 0.0245(8) 0.0329(9) 0.0257(8) 0.0096(7) 0.0069(7) 0.0047(7)
C20 0.0195(8) 0.0231(8) 0.0359(9) -0.0020(7) 0.0030(7) 0.0050(6)

loop_
 _geom_bond_atom_site_label_1
 _geom_bond_atom_site_label_2
 _geom_bond_distance
 _geom_bond_site_symmetry_2
 _geom_bond_publ_flag
O1 C1 1.3413(17) . ?
O1 C15 1.4781(17) . ?
O2 C1 1.2274(17) . ?
O3 C6 1.2129(18) . ?
O4 C7 1.2121(18) . ?
O5 C11 1.4313(17) . ?
O5 H5 0.90(2) . ?
N1 C1 1.3427(19) . ?
N1 C4 1.4787(18) . ?
N1 C2 1.4800(17) . ?
N2 C7 1.377(2) . ?
N2 C6 1.3861(19) . ?
N2 C19 1.4588(19) . ?
C2 C3 1.523(2) . ?
C2 H2A 0.9900 . ?
C2 H2B 0.9900 . ?
C3 C10 1.321(2) . ?
C3 C4 1.5202(19) . ?
C4 C11 1.538(2) . ?
C4 C5 1.556(2) . ?
C5 C6 1.523(2) . ?
C5 C8 1.552(2) . ?
C5 H5A 1.0000 . ?
C7 C8 1.517(2) . ?
C8 C9 1.551(2) . ?
C8 H8 1.0000 . ?
C9 C10 1.521(2) . ?
C9 H9A 0.9900 . ?
C9 H9B 0.9900 . ?
C10 C20 1.497(2) . ?
C11 C12 1.544(2) . ?
C11 H11 1.0000 . ?
C12 C13 1.528(2) . ?
C12 C14 1.534(2) . ?
C12 H12 1.0000 . ?
C13 H13A 0.9800 . ?
C13 H13B 0.9800 . ?
C13 H13C 0.9800 . ?
C14 H14A 0.9800 . ?
C14 H14B 0.9800 . ?
C14 H14C 0.9800 . ?
C15 C18 1.516(2) . ?
C15 C17 1.516(2) . ?
C15 C16 1.517(2) . ?
C16 H16A 0.9800 . ?
C16 H16B 0.9800 . ?
C16 H16C 0.9800 . ?
C17 H17A 0.9800 . ?
C17 H17B 0.9800 . ?
C17 H17C 0.9800 . ?
C18 H18A 0.9800 . ?
C18 H18B 0.9800 . ?
C18 H18C 0.9800 . ?
C19 H19A 0.9800 . ?
C19 H19B 0.9800 . ?
C19 H19C 0.9800 . ?
C20 H20A 0.9800 . ?
C20 H20B 0.9800 . ?
C20 H20C 0.9800 . ?

loop_
 _geom_angle_atom_site_label_1
 _geom_angle_atom_site_label_2
 _geom_angle_atom_site_label_3
 _geom_angle
 _geom_angle_site_symmetry_1
 _geom_angle_site_symmetry_3
 _geom_angle_publ_flag
C1 O1 C15 120.53(11) . . ?
C11 O5 H5 107.4(14) . . ?
C1 N1 C4 129.76(12) . . ?
C1 N1 C2 133.49(12) . . ?
C4 N1 C2 95.35(10) . . ?
C7 N2 C6 113.51(13) . . ?
C7 N2 C19 122.69(13) . . ?
C6 N2 C19 123.72(13) . . ?
O2 C1 O1 126.29(14) . . ?
O2 C1 N1 123.04(13) . . ?
O1 C1 N1 110.64(12) . . ?
N1 C2 C3 86.25(10) . . ?
N1 C2 H2A 114.3 . . ?
C3 C2 H2A 114.3 . . ?
N1 C2 H2B 114.3 . . ?
C3 C2 H2B 114.3 . . ?
H2A C2 H2B 111.4 . . ?
C10 C3 C4 124.55(13) . . ?
C10 C3 C2 140.63(13) . . ?
C4 C3 C2 91.93(11) . . ?
N1 C4 C3 86.38(10) . . ?
N1 C4 C11 115.00(12) . . ?
C3 C4 C11 119.21(12) . . ?
N1 C4 C5 118.03(12) . . ?
C3 C4 C5 108.15(11) . . ?
C11 C4 C5 108.83(11) . . ?
C6 C5 C8 104.32(11) . . ?
C6 C5 C4 114.42(11) . . ?
C8 C5 C4 110.73(11) . . ?
C6 C5 H5A 109.1 . . ?
C8 C5 H5A 109.1 . . ?
C4 C5 H5A 109.1 . . ?
O3 C6 N2 123.75(14) . . ?
O3 C6 C5 127.66(14) . . ?
N2 C6 C5 108.57(12) . . ?
O4 C7 N2 124.41(15) . . ?
O4 C7 C8 126.62(15) . . ?
N2 C7 C8 108.95(12) . . ?
C7 C8 C9 107.45(12) . . ?
C7 C8 C5 104.55(12) . . ?
C9 C8 C5 116.71(12) . . ?
C7 C8 H8 109.3 . . ?
C9 C8 H8 109.3 . . ?
C5 C8 H8 109.3 . . ?
C10 C9 C8 110.18(12) . . ?
C10 C9 H9A 109.6 . . ?
C8 C9 H9A 109.6 . . ?
C10 C9 H9B 109.6 . . ?
C8 C9 H9B 109.6 . . ?
H9A C9 H9B 108.1 . . ?
C3 C10 C20 125.41(13) . . ?
C3 C10 C9 113.93(13) . . ?
C20 C10 C9 120.42(13) . . ?
O5 C11 C4 110.07(12) . . ?
O5 C11 C12 111.71(12) . . ?
C4 C11 C12 116.68(12) . . ?
O5 C11 H11 105.9 . . ?
C4 C11 H11 105.9 . . ?
C12 C11 H11 105.9 . . ?
C13 C12 C14 110.82(15) . . ?
C13 C12 C11 114.35(14) . . ?
C14 C12 C11 107.87(13) . . ?
C13 C12 H12 107.9 . . ?
C14 C12 H12 107.9 . . ?
C11 C12 H12 107.9 . . ?
C12 C13 H13A 109.5 . . ?
C12 C13 H13B 109.5 . . ?
H13A C13 H13B 109.5 . . ?
C12 C13 H13C 109.5 . . ?
H13A C13 H13C 109.5 . . ?
H13B C13 H13C 109.5 . . ?
C12 C14 H14A 109.5 . . ?
C12 C14 H14B 109.5 . . ?
H14A C14 H14B 109.5 . . ?
C12 C14 H14C 109.5 . . ?
H14A C14 H14C 109.5 . . ?
H14B C14 H14C 109.5 . . ?
O1 C15 C18 109.40(13) . . ?
O1 C15 C17 102.57(12) . . ?
C18 C15 C17 111.42(13) . . ?
O1 C15 C16 110.36(12) . . ?
C18 C15 C16 112.28(15) . . ?
C17 C15 C16 110.38(14) . . ?
C15 C16 H16A 109.5 . . ?
C15 C16 H16B 109.5 . . ?
H16A C16 H16B 109.5 . . ?
C15 C16 H16C 109.5 . . ?
H16A C16 H16C 109.5 . . ?
H16B C16 H16C 109.5 . . ?
C15 C17 H17A 109.5 . . ?
C15 C17 H17B 109.5 . . ?
H17A C17 H17B 109.5 . . ?
C15 C17 H17C 109.5 . . ?
H17A C17 H17C 109.5 . . ?
H17B C17 H17C 109.5 . . ?
C15 C18 H18A 109.5 . . ?
C15 C18 H18B 109.5 . . ?
H18A C18 H18B 109.5 . . ?
C15 C18 H18C 109.5 . . ?
H18A C18 H18C 109.5 . . ?
H18B C18 H18C 109.5 . . ?
N2 C19 H19A 109.5 . . ?
N2 C19 H19B 109.5 . . ?
H19A C19 H19B 109.5 . . ?
N2 C19 H19C 109.5 . . ?
H19A C19 H19C 109.5 . . ?
H19B C19 H19C 109.5 . . ?
C10 C20 H20A 109.5 . . ?
C10 C20 H20B 109.5 . . ?
H20A C20 H20B 109.5 . . ?
C10 C20 H20C 109.5 . . ?
H20A C20 H20C 109.5 . . ?
H20B C20 H20C 109.5 . . ?

loop_
 _geom_torsion_atom_site_label_1
 _geom_torsion_atom_site_label_2
 _geom_torsion_atom_site_label_3
 _geom_torsion_atom_site_label_4
 _geom_torsion
 _geom_torsion_site_symmetry_1
 _geom_torsion_site_symmetry_2
 _geom_torsion_site_symmetry_3
 _geom_torsion_site_symmetry_4
 _geom_torsion_publ_flag
C15 O1 C1 O2 1.6(2) . . . . ?
C15 O1 C1 N1 179.86(12) . . . . ?
C4 N1 C1 O2 -20.4(2) . . . . ?
C2 N1 C1 O2 176.53(14) . . . . ?
C4 N1 C1 O1 161.22(13) . . . . ?
C2 N1 C1 O1 -1.8(2) . . . . ?
C1 N1 C2 C3 164.80(16) . . . . ?
C4 N1 C2 C3 -2.20(11) . . . . ?
N1 C2 C3 C10 -157.2(2) . . . . ?
N1 C2 C3 C4 2.13(11) . . . . ?
C1 N1 C4 C3 -165.53(15) . . . . ?
C2 N1 C4 C3 2.20(11) . . . . ?
C1 N1 C4 C11 73.80(19) . . . . ?
C2 N1 C4 C11 -118.47(13) . . . . ?
C1 N1 C4 C5 -56.9(2) . . . . ?
C2 N1 C4 C5 110.86(13) . . . . ?
C10 C3 C4 N1 162.10(14) . . . . ?
C2 C3 C4 N1 -2.13(11) . . . . ?
C10 C3 C4 C11 -81.16(19) . . . . ?
C2 C3 C4 C11 114.60(13) . . . . ?
C10 C3 C4 C5 43.76(18) . . . . ?
C2 C3 C4 C5 -120.47(12) . . . . ?
N1 C4 C5 C6 -25.03(17) . . . . ?
C3 C4 C5 C6 70.66(15) . . . . ?
C11 C4 C5 C6 -158.46(12) . . . . ?
N1 C4 C5 C8 -142.58(12) . . . . ?
C3 C4 C5 C8 -46.88(14) . . . . ?
C11 C4 C5 C8 84.00(14) . . . . ?
C7 N2 C6 O3 177.92(13) . . . . ?
C19 N2 C6 O3 1.2(2) . . . . ?
C7 N2 C6 C5 -0.59(16) . . . . ?
C19 N2 C6 C5 -177.32(12) . . . . ?
C8 C5 C6 O3 180.00(14) . . . . ?
C4 C5 C6 O3 58.9(2) . . . . ?
C8 C5 C6 N2 -1.56(15) . . . . ?
C4 C5 C6 N2 -122.71(13) . . . . ?
C6 N2 C7 O4 -179.41(14) . . . . ?
C19 N2 C7 O4 -2.6(2) . . . . ?
C6 N2 C7 C8 2.57(16) . . . . ?
C19 N2 C7 C8 179.34(12) . . . . ?
O4 C7 C8 C9 -56.69(19) . . . . ?
N2 C7 C8 C9 121.27(13) . . . . ?
O4 C7 C8 C5 178.68(14) . . . . ?
N2 C7 C8 C5 -3.36(15) . . . . ?
C6 C5 C8 C7 2.89(14) . . . . ?
C4 C5 C8 C7 126.45(12) . . . . ?
C6 C5 C8 C9 -115.63(13) . . . . ?
C4 C5 C8 C9 7.94(17) . . . . ?
C7 C8 C9 C10 -76.63(15) . . . . ?
C5 C8 C9 C10 40.30(17) . . . . ?
C4 C3 C10 C20 -167.83(14) . . . . ?
C2 C3 C10 C20 -13.2(3) . . . . ?
C4 C3 C10 C9 6.5(2) . . . . ?
C2 C3 C10 C9 161.11(17) . . . . ?
C8 C9 C10 C3 -48.76(17) . . . . ?
C8 C9 C10 C20 125.85(15) . . . . ?
N1 C4 C11 O5 -70.44(15) . . . . ?
C3 C4 C11 O5 -170.87(12) . . . . ?
C5 C4 C11 O5 64.53(15) . . . . ?
N1 C4 C11 C12 58.19(17) . . . . ?
C3 C4 C11 C12 -42.24(19) . . . . ?
C5 C4 C11 C12 -166.84(12) . . . . ?
O5 C11 C12 C13 53.11(17) . . . . ?
C4 C11 C12 C13 -74.73(17) . . . . ?
O5 C11 C12 C14 -70.66(18) . . . . ?
C4 C11 C12 C14 161.50(15) . . . . ?
C1 O1 C15 C18 -64.89(17) . . . . ?
C1 O1 C15 C17 176.74(12) . . . . ?
C1 O1 C15 C16 59.14(17) . . . . ?

loop_
 _geom_hbond_atom_site_label_D
 _geom_hbond_atom_site_label_H
 _geom_hbond_atom_site_label_A
 _geom_hbond_distance_DH
 _geom_hbond_distance_HA
 _geom_hbond_distance_DA
 _geom_hbond_angle_DHA
 _geom_hbond_site_symmetry_A
O5 H5 O2  0.90(2) 1.91(2) 2.7916(16) 166(2) .

_geom_special_details 
;

All esds (except the esd in the dihedral angle between two l.s. planes)
are estimated using the full covariance matrix.  The cell esds are taken
into account individually in the estimation of esds in distances, angles
and torsion angles; correlations between esds in cell parameters are only
used when they are defined by crystal symmetry.  An approximate (isotropic)
treatment of cell esds is used for estimating esds involving l.s. planes.
;

_audit_block_code                 C20H30N2O5_vv153_knochel
_audit_creation_method                  'APEX3 v2016.5-0'
_shelxl_version_number            ?
_chemical_name_systematic         ?
_chemical_formula_moiety          'C20 H30 N2 O5'
_chemical_formula_sum                   'C20 H30 N2 O5'
_chemical_formula_weight                378.46 #?# (Cohen, 1996)
_chemical_melting_point           ? #?# in K!

_cell_formula_units_Z                   2 #?# adjust to _chemical_formula_[]

_exptl_crystal_density_diffrn           1.216
_exptl_crystal_F_000                    408 #?# check!

_shelx_res_file 
;


    vv153_0m_a.res created by SHELXL-2014/7


TITL vv153_0m_a.res in P-1
REM Old TITL vv153_0m in P-1
REM SHELXT solution in P-1
REM R1 0.136,  Rweak 0.005,  Alpha 0.036,  Orientation as input
REM Formula found by SHELXT:  C20 N2 O5
CELL  0.71073   7.4167  10.5318  13.8110   99.828  102.136   93.865
ZERR    2.000   0.0003   0.0005   0.0006    0.002    0.001    0.002
LATT  1
SFAC C H N O
UNIT 40 60 4 10
TEMP -173.15
SIZE 0.09 0.10 0.10
L.S. 10
BOND $H
LIST 4
CONF
ACTA
SHEL 6.5 0.8
HTAB
HTAB O5 O2
FMAP 2
PLAN -20
WGHT    0.031200    0.390600
FVAR       0.99584
O1    4    0.579225    0.328307    0.193151    11.00000    0.01809    0.01482 =
         0.02627   -0.00017    0.00159    0.00139
O2    4    0.891935    0.386834    0.221693    11.00000    0.01777    0.02268 =
         0.03190    0.00065    0.00434    0.00585
O3    4    0.784297    0.454105    0.431422    11.00000    0.02623    0.01785 =
         0.02689    0.00412    0.00146   -0.00072
O4    4    0.810665    0.855428    0.621557    11.00000    0.03867    0.02928 =
         0.02556   -0.00179    0.00515    0.01104
O5    4    1.086910    0.625136    0.227326    11.00000    0.01473    0.02957 =
         0.03434    0.00644    0.00795    0.00627
H5    2    1.034407    0.542553    0.217472    11.00000    0.05598
N1    3    0.687702    0.535322    0.234113    11.00000    0.01257    0.01526 =
         0.02403    0.00024    0.00098    0.00151
N2    3    0.776699    0.643998    0.539443    11.00000    0.01810    0.02194 =
         0.02069    0.00383    0.00335    0.00383
C1    1    0.732089    0.413235    0.217295    11.00000    0.01903    0.01977 =
         0.01643    0.00130    0.00135    0.00212
C2    1    0.509577    0.592188    0.228794    11.00000    0.01332    0.01902 =
         0.02252    0.00324    0.00230    0.00370
AFIX  23
H2A   2    0.425477    0.553080    0.265234    11.00000   -1.20000
H2B   2    0.443812    0.598047    0.159728    11.00000   -1.20000
AFIX   0
C3    1    0.624934    0.716944    0.288331    11.00000    0.01227    0.01889 =
         0.02132    0.00681    0.00263    0.00126
C4    1    0.805042    0.656075    0.288274    11.00000    0.01434    0.01550 =
         0.02259    0.00194    0.00320    0.00167
C5    1    0.907529    0.662067    0.399781    11.00000    0.01219    0.01759 =
         0.02304    0.00352    0.00120    0.00168
AFIX  13
H5A   2    1.037951    0.641928    0.401739    11.00000   -1.20000
AFIX   0
C6    1    0.816094    0.571126    0.454377    11.00000    0.01214    0.02069 =
         0.02134    0.00463   -0.00189    0.00158
C7    1    0.830597    0.774523    0.551949    11.00000    0.01726    0.02324 =
         0.02293    0.00249   -0.00188    0.00603
C8    1    0.910710    0.798931    0.463561    11.00000    0.01370    0.01846 =
         0.02462    0.00135   -0.00041   -0.00002
AFIX  13
H8    2    1.042061    0.838870    0.489092    11.00000   -1.20000
AFIX   0
C9    1    0.793624    0.895338    0.411586    11.00000    0.02020    0.01547 =
         0.02701    0.00206    0.00309    0.00117
AFIX  23
H9A   2    0.770939    0.966012    0.463401    11.00000   -1.20000
H9B   2    0.862670    0.934295    0.367927    11.00000   -1.20000
AFIX   0
C10   1    0.609324    0.825593    0.348390    11.00000    0.01587    0.01694 =
         0.02471    0.00536    0.00329    0.00237
C11   1    0.942493    0.708092    0.231423    11.00000    0.01444    0.02334 =
         0.02631    0.00510    0.00573    0.00319
AFIX  13
H11   2    1.003849    0.792474    0.274294    11.00000   -1.20000
AFIX   0
C12   1    0.859007    0.738684    0.126849    11.00000    0.01965    0.03362 =
         0.02833    0.01108    0.00667    0.00268
AFIX  13
H12   2    0.749431    0.787349    0.132853    11.00000   -1.20000
AFIX   0
C13   1    0.793618    0.619134    0.043395    11.00000    0.04335    0.04807 =
         0.02499    0.00598    0.00630    0.01003
AFIX 137
H13A  2    0.752732    0.646442   -0.021375    11.00000   -1.50000
H13B  2    0.690120    0.568636    0.058075    11.00000   -1.50000
H13C  2    0.896077    0.565672    0.039977    11.00000   -1.50000
AFIX   0
C14   1    1.004395    0.828644    0.099779    11.00000    0.03134    0.07160 =
         0.04285    0.03191    0.00526   -0.00761
AFIX 137
H14A  2    0.952631    0.852684    0.034896    11.00000   -1.50000
H14B  2    1.114598    0.783761    0.094901    11.00000   -1.50000
H14C  2    1.038844    0.906962    0.152246    11.00000   -1.50000
AFIX   0
C15   1    0.593272    0.187439    0.171001    11.00000    0.02745    0.01374 =
         0.02627   -0.00085    0.00288    0.00317
C16   1    0.712969    0.145545    0.260940    11.00000    0.04014    0.02567 =
         0.04438    0.01092   -0.00451    0.00210
AFIX 137
H16A  2    0.701889    0.050686    0.250514    11.00000   -1.50000
H16B  2    0.671631    0.180083    0.322168    11.00000   -1.50000
H16C  2    0.842700    0.178805    0.268233    11.00000   -1.50000
AFIX   0
C17   1    0.393652    0.130151    0.154379    11.00000    0.03096    0.02018 =
         0.03227    0.00028    0.00474   -0.00323
AFIX 137
H17A  2    0.386945    0.035352    0.139619    11.00000   -1.50000
H17B  2    0.317362    0.160211    0.097463    11.00000   -1.50000
H17C  2    0.347602    0.157854    0.215311    11.00000   -1.50000
AFIX   0
C18   1    0.666830    0.154420    0.076361    11.00000    0.04295    0.02905 =
         0.03909   -0.00965    0.01677   -0.00396
AFIX 137
H18A  2    0.664270    0.060156    0.057713    11.00000   -1.50000
H18B  2    0.794638    0.194736    0.088914    11.00000   -1.50000
H18C  2    0.589142    0.187019    0.021264    11.00000   -1.50000
AFIX   0
C19   1    0.695573    0.588191    0.612279    11.00000    0.02453    0.03293 =
         0.02566    0.00957    0.00690    0.00465
AFIX 137
H19A  2    0.778693    0.612934    0.679280    11.00000   -1.50000
H19B  2    0.678195    0.493532    0.592317    11.00000   -1.50000
H19C  2    0.575332    0.620617    0.614170    11.00000   -1.50000
AFIX   0
C20   1    0.430526    0.874331    0.363764    11.00000    0.01948    0.02306 =
         0.03592   -0.00198    0.00301    0.00501
AFIX 137
H20A  2    0.424559    0.961133    0.347415    11.00000   -1.50000
H20B  2    0.423575    0.878271    0.434278    11.00000   -1.50000
H20C  2    0.326369    0.815501    0.319666    11.00000   -1.50000
REM #####
AFIX   0
HKLF 4

REM  vv153_0m_a.res in P-1
REM R1 =  0.0408 for    3302 Fo > 4sig(Fo)  and  0.0583 for all    4205 data
REM    255 parameters refined using      0 restraints

END

WGHT      0.0312      0.3906

REM Instructions for potential hydrogen bonds
HTAB O5 O2
HTAB O5 N1
EQIV $1 x-1, y, z
HTAB C2 O5_$1
HTAB C16 O2
HTAB C18 O2
EQIV $2 -x+2, -y+1, -z+1
HTAB C19 O2_$2
EQIV $3 -x+1, -y+1, -z+1
HTAB C19 O3_$3

REM Highest difference peak  0.255,  deepest hole -0.241,  1-sigma level  0.043
Q1    1   0.7201  0.6981  0.2843  11.00000  0.05    0.26
Q2    1   0.8499  0.6183  0.4172  11.00000  0.05    0.25
Q3    1   0.8675  0.6813  0.2584  11.00000  0.05    0.21
Q4    1   0.5559  0.6775  0.2542  11.00000  0.05    0.20
Q5    1   0.6179  0.7516  0.3447  11.00000  0.05    0.20
Q6    1   0.8485  0.6584  0.3436  11.00000  0.05    0.20
Q7    1   0.8894  0.7990  0.5140  11.00000  0.05    0.18
Q8    1   0.8996  0.7262  0.4246  11.00000  0.05    0.18
Q9    1   0.8858  0.7151  0.1765  11.00000  0.05    0.17
Q10   1   0.7286  0.6179  0.5669  11.00000  0.05    0.16
Q11   1   0.6682  0.0578  0.2621  11.00000  0.05    0.16
Q12   1   0.8241  0.5356  0.6588  11.00000  0.05    0.16
Q13   1   0.8561  0.8407  0.4373  11.00000  0.05    0.15
Q14   1   0.5906  0.5453  0.2258  11.00000  0.05    0.15
Q15   1   0.7678  0.5256  0.0576  11.00000  0.05    0.14
Q16   1   0.8358  0.1835  0.3007  11.00000  0.05    0.14
Q17   1   0.5661  0.1980  0.3378  11.00000  0.05    0.14
Q18   1   0.5949  0.7785  0.2920  11.00000  0.05    0.14
Q19   1   0.0780  0.0054  0.7582  11.00000  0.05    0.14
Q20   1   0.9105  0.3881  0.3308  11.00000  0.05    0.14
;
_shelx_res_checksum                     16272
_shelx_hkl_file
;
  -2   0   0 1592.54   54.09
  -2   0   0 1603.04   56.39
   2   0   0 1589.74   56.39
   2   0   0 1576.94   53.99
  -3   0   0  244.38   10.40
  -3   0   0  251.97   13.30
   3   0   0  235.28   10.10
   3   0   0  251.37   13.10
  -4   0   0  263.97   11.80
  -4   0   0  271.37   15.20
   4   0   0  247.18   14.80
   4   0   0  272.07   11.50
  -5   0   0  180.88   13.10
  -5   0   0  203.58   10.20
   5   0   0  193.58   13.50
   5   0   0  196.08    9.50
  -6   0   0  116.79    7.80
  -6   0   0  120.29   11.50
   6   0   0  122.89    7.20
   6   0   0  116.49   11.60
  -7   0   0   59.39   10.00
  -7   0   0   59.79    5.60
   7   0   0   47.40    4.50
  -8   0   0   84.29    7.30
  -8   0   0   99.79   11.90
  -9   0   0    1.20    3.40
   9   0   0   -1.50    2.20
   9  -1   0    6.20    2.80
   9  -1   0    2.60    3.20
  -9   1   0    5.90    6.10
   8  -1   0    3.60    1.80
  -8   1   0   -1.40    2.60
  -8   1   0    0.00    2.50
   7  -1   0  184.18   11.20
  -7   1   0  185.48   11.30
  -7   1   0  193.18   15.70
   6  -1   0  497.45   26.10
   6  -1   0  488.05   20.30
  -6   1   0  465.65   25.50
  -6   1   0  459.35   21.00
   5  -1   0   15.70    2.90
   5  -1   0   21.80    4.80
  -5   1   0   18.50    4.70
   4  -1   0  554.44   21.50
   4  -1   0  550.34   24.90
  -4   1   0  538.55   24.80
  -4   1   0  539.95   22.00
   3  -1   0   10.20    2.70
   3  -1   0    9.10    1.80
  -3   1   0   17.60    2.70
   2  -1   0 4085.69  176.78
  -2   1   0 4070.79  183.18
   1  -1   0  732.53   25.80
   1  -1   0  704.43   25.40
   1   1   0 4889.01  240.08
  -2  -1   0  364.96   16.40
  -2  -1   0  376.76   13.90
   2   1   0  381.06   16.70
   2   1   0  380.76   13.90
  -3  -1   0  964.10   34.30
  -3  -1   0 1009.90   38.50
   3   1   0  960.50   34.20
   3   1   0  960.30   38.40
  -4  -1   0   26.90    5.20
  -4  -1   0   13.70    2.30
   4   1   0   12.00    3.50
   4   1   0   15.70    2.30
  -5  -1   0  829.92   35.80
  -5  -1   0  751.22   29.40
   5   1   0  775.62   35.70
   5   1   0  777.62   29.00
  -6  -1   0  211.58   10.80
  -6  -1   0  198.98   15.60
   6   1   0  197.08    9.90
   6   1   0  190.98   15.50
  -7  -1   0    2.50    3.60
  -7  -1   0    3.00    2.00
   7   1   0    3.10    1.50
  -8  -1   0   40.20    5.10
  -8  -1   0   50.89   10.40
   8   1   0   59.19    4.70
   9  -2   0   19.10    3.70
   9  -2   0   25.90    5.50
  -9   2   0   25.40    8.10
   8  -2   0    4.30    2.30
  -8   2   0   12.90    6.00
   7  -2   0  273.47   21.60
   7  -2   0  262.47   13.40
  -7   2   0  234.38   14.20
  -7   2   0  235.18   17.80
   6  -2   0   69.39    8.30
   6  -2   0   64.99    5.70
  -6   2   0   53.89    8.80
  -6   2   0   59.39    6.20
   5  -2   0   98.09    8.80
   5  -2   0  101.29    7.00
  -5   2   0  108.69    9.60
  -5   2   0  106.39    7.70
   4  -2   0  367.26   16.10
   4  -2   0  364.26   18.40
  -4   2   0  357.66   18.50
   3  -2   0  601.44   23.60
   3  -2   0  592.74   25.10
  -3   2   0  600.74   23.90
  -3   2   0  600.84   25.60
   2  -2   0    7.00    1.90
   2  -2   0    8.20    1.70
  -2   2   0    7.60    1.90
  -2   2   0    6.20    1.80
   1  -2   0  958.10   35.40
   1  -2   0  994.30   35.60
   1  -2   0 1000.40   35.90
  -1   2   0  983.70   35.60
  -1   2   0 1010.50   35.80
   0  -2   0 1744.33   60.19
   0  -2   0 1723.43   59.29
   0   2   0 1722.53   60.09
   0   2   0 1709.03   59.29
  -1  -2   0   10.40    2.30
  -1  -2   0   10.50    1.60
   1   2   0   10.40    1.80
   1   2   0    5.80    2.00
  -2  -2   0 2549.15   89.39
  -2  -2   0 2584.04   85.89
   2   2   0 2556.24   89.89
   2   2   0 2480.05   85.99
  -3  -2   0  568.64   21.30
  -3  -2   0  568.84   25.50
   3   2   0  604.04   26.40
   3   2   0  567.44   21.40
  -4  -2   0  773.22   33.60
  -4  -2   0  743.93   27.90
   4   2   0  747.93   27.90
   4   2   0  780.22   34.20
  -5  -2   0  114.49    6.60
  -5  -2   0  125.09   10.70
   5   2   0  111.19    6.50
   5   2   0  114.19   10.80
  -6  -2   0   22.40    3.60
  -6  -2   0   22.30    6.00
   6   2   0   23.40    6.10
   6   2   0   26.40    3.00
  -7  -2   0  173.88   15.50
   7   2   0  172.18    9.10
   8   2   0   10.70    2.50
   8  -3   0   -5.70    2.20
   8  -3   0    0.20    2.10
  -8   3   0    5.60    5.10
   7  -3   0   11.20    3.10
  -7   3   0   12.30    5.30
  -7   3   0   20.40    5.10
   6  -3   0   36.50    6.90
   6  -3   0   37.80    5.40
  -6   3   0   36.60    6.10
  -6   3   0   40.30    7.30
   5  -3   0  195.58   13.50
   5  -3   0  213.48   11.70
  -5   3   0  201.18   13.90
  -5   3   0  198.68   12.20
   4  -3   0  325.07   17.10
   4  -3   0  318.77   15.40
  -4   3   0  309.87   17.10
  -4   3   0  332.87   16.10
   3  -3   0 2682.93   96.09
   3  -3   0 2722.13   94.99
   3  -3   0 2783.42   96.89
  -3   3   0 2709.43   95.69
   2  -3   0   16.40    3.00
   2  -3   0   20.00    3.40
   2  -3   0   16.90    3.30
  -2   3   0   16.60    3.10
   1  -3   0  355.96   15.50
   1  -3   0  343.77   15.30
   1  -3   0  353.76   15.80
  -1   3   0  363.26   15.80
   0  -3   0  910.41   34.00
   0  -3   0  864.41   32.60
   0   3   0  895.61   32.80
   0   3   0  865.71   33.70
  -1  -3   0  557.44   26.20
  -1  -3   0  672.33   24.50
   1   3   0  673.03   27.10
   1   3   0  685.93   24.80
  -2  -3   0 1108.29   37.40
  -2  -3   0 1110.49   41.40
   2   3   0 1074.79   37.70
   2   3   0  864.71   40.60
  -3  -3   0   32.70    3.00
  -3  -3   0   33.60    5.80
   3   3   0   28.10    5.60
   3   3   0   23.60    3.20
  -4  -3   0  128.89   10.60
  -4  -3   0  124.49    6.80
   4   3   0  126.09    7.00
   4   3   0  119.09   10.80
  -5  -3   0   26.40    6.40
  -5  -3   0   26.80    3.40
   5   3   0   28.50    3.30
   5   3   0   32.60    7.30
  -6  -3   0  316.07   21.00
  -6  -3   0  308.87   15.30
   6   3   0  339.77   22.70
   6   3   0  317.57   14.30
  -7  -3   0  381.46   24.70
   7   3   0  335.57   15.40
  -8  -3   0   -0.80    4.10
  -8  -3   0   -4.00    2.00
   8   3   0   -2.50    1.60
   8  -4   0    0.30    2.90
   8  -4   0   -1.00    2.80
  -8   4   0    1.30    4.20
   7  -4   0    8.30    3.70
   7  -4   0    5.40    2.90
   6  -4   0  355.46   25.50
   6  -4   0  364.66   18.70
   6  -4   0  389.46   20.20
   6  -4   0  394.36   25.00
  -6   4   0  360.96   19.70
  -6   4   0  373.86   24.90
   5  -4   0   22.30    5.10
   5  -4   0   25.50    5.80
   5  -4   0   23.30    4.40
  -5   4   0   20.50    4.60
   4  -4   0   -0.70    1.50
   4  -4   0   -2.80    1.10
   4  -4   0    1.20    1.80
  -4   4   0    1.90    1.60
   3  -4   0   39.90    4.50
   3  -4   0   33.80    5.50
   3  -4   0   49.10    5.20
   3  -4   0   39.40    4.80
   2  -4   0  419.96   19.20
   2  -4   0  401.36   18.80
  -2   4   0  425.56   19.40
   1  -4   0  161.18   10.90
   1  -4   0  166.98   10.10
   1  -4   0  152.58    9.30
  -1   4   0  171.88   10.10
   0  -4   0 5935.61  197.88
   0   4   0 5779.22  197.88
   0   4   0 5837.52  199.38
  -1  -4   0  101.99    8.60
  -1  -4   0  125.49    7.40
   1   4   0  130.29    9.20
   1   4   0  115.79    7.40
  -2  -4   0   50.69    6.40
  -2  -4   0   52.49    4.40
   2   4   0   54.59    6.80
   2   4   0   48.10    4.40
  -3  -4   0  301.37   13.20
  -3  -4   0  335.87   18.00
   3   4   0  283.67   13.50
   3   4   0  244.48   16.90
  -4  -4   0   46.30    7.70
  -4  -4   0   48.30    4.20
   4   4   0   38.20    7.60
   4   4   0   39.10    4.10
  -5  -4   0   90.19   10.10
  -5  -4   0   96.39    8.80
   5   4   0   92.39    6.50
   5   4   0   93.59   15.40
  -6  -4   0    2.10    1.60
  -6  -4   0    3.50    3.00
   6   4   0    3.10    1.70
  -7  -4   0  144.09   14.70
   7   4   0  119.49    7.70
  -8  -4   0   52.09   11.10
   8   4   0   37.50    4.20
   8  -5   0  174.58   14.00
   8  -5   0  209.28   19.00
   8  -5   0  199.08   13.40
   7  -5   0   16.70    6.10
   7  -5   0   13.40    4.90
   6  -5   0  380.76   22.40
   6  -5   0  320.47   20.00
   6  -5   0  305.07   18.70
   6  -5   0  310.77   17.80
   5  -5   0  399.66   22.80
   5  -5   0  406.16   20.40
   5  -5   0  406.16   21.20
   5  -5   0  383.86   21.70
   4  -5   0  346.07   18.50
   4  -5   0  360.16   19.30
   4  -5   0  372.06   20.50
   4  -5   0  396.86   20.10
   3  -5   0  294.27   16.10
   3  -5   0  298.17   15.80
   3  -5   0  283.37   16.40
   3  -5   0  290.07   16.00
   2  -5   0  239.18   13.90
   2  -5   0  206.98   12.70
   2  -5   0  217.48   12.70
  -2   5   0  222.38   13.20
   1  -5   0  168.98   10.40
   1  -5   0  171.28   10.50
   1  -5   0  152.88   10.90
  -1   5   0  161.48   10.80
   0  -5   0  748.03   30.90
   0  -5   0  806.42   33.40
   0   5   0  747.23   32.60
   0   5   0  771.72   31.30
  -1  -5   0  158.28    9.20
  -1  -5   0  114.09   10.20
   1   5   0  148.19    9.20
   1   5   0  155.18   11.50
  -2  -5   0  172.08   12.50
  -2  -5   0  163.48    9.30
   2   5   0  140.09    9.20
   2   5   0  148.19   12.00
  -3  -5   0  725.03   27.80
  -3  -5   0  754.92   33.40
   3   5   0  682.63   28.30
   3   5   0  624.34   33.10
  -4  -5   0  161.48   13.40
  -4  -5   0  177.38    9.50
   4   5   0  142.19   13.70
   4   5   0  166.48    9.90
  -5  -5   0   20.00    3.30
  -5  -5   0   16.40    5.30
   5   5   0   22.40    3.80
   5   5   0    4.90    4.10
  -6  -5   0  272.27   20.10
  -6  -5   0  262.27   12.90
   6   5   0  256.67   13.40
  -7  -5   0   29.00    4.10
   7   5   0   28.80    4.10
   8  -6   0   32.10    8.70
   8  -6   0   12.90    6.30
   7  -6   0   -0.70    2.70
   7  -6   0   -1.40    2.90
   7  -6   0    4.30    4.50
   6  -6   0   92.59   10.30
   6  -6   0  105.49   11.60
   6  -6   0  100.39   14.10
   5  -6   0  425.46   22.20
   5  -6   0  426.46   23.00
   5  -6   0  430.86   24.60
   5  -6   0  416.76   23.10
   4  -6   0  465.35   24.00
   4  -6   0  460.65   23.40
   4  -6   0  475.85   24.20
   4  -6   0  500.05   25.50
   3  -6   0   30.40    5.80
   3  -6   0   33.90    6.00
   3  -6   0   34.70    5.80
   3  -6   0   40.00    7.10
  -3   6   0   29.10    5.90
   2  -6   0   23.10    5.40
   2  -6   0   26.40    4.80
   2  -6   0   16.50    4.40
  -2   6   0   18.50    4.40
   1  -6   0  103.69    8.50
   1  -6   0  122.39    9.90
   1  -6   0   94.39    8.20
  -1   6   0   99.79    8.80
   0  -6   0  282.07   16.90
   0  -6   0  265.77   14.80
   0   6   0  274.57   15.20
   0   6   0  272.57   16.30
  -1  -6   0   14.70    4.70
  -1  -6   0   12.40    3.30
   1   6   0   21.40    4.10
   1   6   0   20.40    5.20
  -2  -6   0   42.60    5.80
  -2  -6   0   45.20    8.10
   2   6   0   58.39    7.20
   2   6   0   49.40    5.30
  -3  -6   0  932.91   40.60
  -3  -6   0  849.32   34.10
   3   6   0  850.41   35.10
   3   6   0  833.22   40.70
  -4  -6   0   29.30    6.80
  -4  -6   0   33.10    4.60
   4   6   0   25.70    4.80
   4   6   0   25.70    7.00
  -5  -6   0    8.40    4.40
  -5  -6   0    8.50    2.80
   5   6   0    7.40    2.80
  -6  -6   0   48.00    5.40
  -6  -6   0   49.20    9.90
   6   6   0   47.50    5.20
  -7  -6   0    2.20    2.70
  -7  -6   0    2.90    3.80
   8  -7   0   16.70    6.60
   8  -7   0   11.40    6.50
   7  -7   0    6.40    5.40
   7  -7   0   -4.30    2.90
   6  -7   0    0.60    3.20
   6  -7   0   -2.20    2.70
   6  -7   0   -0.60    3.10
   6  -7   0   -2.00    2.60
   5  -7   0   16.50    4.60
   5  -7   0   11.50    4.90
   4  -7   0  566.74   29.70
   4  -7   0  560.14   28.30
   4  -7   0  601.24   28.50
   4  -7   0  572.84   28.60
   3  -7   0  384.86   21.50
   3  -7   0  392.16   21.30
   3  -7   0  405.36   22.70
  -3   7   0  403.56   22.10
   2  -7   0   36.10    6.90
   2  -7   0   34.90    6.20
   2  -7   0   29.20    5.70
  -2   7   0   33.80    6.30
   1  -7   0  472.75   24.40
   1  -7   0  439.66   22.40
   1  -7   0  425.16   22.10
  -1   7   0  443.86   23.50
   0  -7   0  161.88   11.40
   0  -7   0  173.98   13.60
   0  -7   0  153.88   11.20
   0   7   0  176.38   13.10
  -1  -7   0   82.69    9.80
  -1  -7   0  105.79    8.60
   1   7   0  107.49    8.90
   1   7   0  115.99   10.90
  -2  -7   0  172.38   11.20
  -2  -7   0  185.68   14.90
   2   7   0  171.48   11.70
   2   7   0  175.78   14.50
  -3  -7   0   -1.40    1.70
   3   7   0   -0.70    1.70
  -4  -7   0  219.38   17.30
  -4  -7   0  206.78   12.10
   4   7   0  188.18   12.50
   4   7   0  197.58   17.80
  -5  -7   0    3.40    4.20
  -5  -7   0    2.90    2.00
   5   7   0    3.80    2.30
  -6  -7   0  160.68   10.20
   6   7   0  183.08   11.60
  -7  -7   0   69.79    6.80
   7   7   0   59.39    6.60
   7  -8   0    8.60    5.40
   7  -8   0   -3.60    3.10
   6  -8   0   41.50    9.30
   6  -8   0   68.09   10.50
   5  -8   0   16.10    5.40
   5  -8   0    9.80    4.70
   5  -8   0   23.90    6.10
   4  -8   0   99.79   10.60
   4  -8   0  123.59   11.60
   4  -8   0  117.89   11.20
   4  -8   0  129.69   13.00
   3  -8   0   -2.60    2.50
   3  -8   0    1.00    2.40
   3  -8   0    2.50    3.00
  -3   8   0   -1.60    1.80
   2  -8   0  207.68   14.30
   2  -8   0  183.28   14.50
   2  -8   0  172.38   13.30
  -2   8   0  181.68   14.20
   1  -8   0    4.10    2.90
   1  -8   0   -0.90    2.10
   1  -8   0   -0.80    2.50
  -1   8   0    2.70    2.50
   0  -8   0    7.50    2.60
   0  -8   0    8.20    3.50
   0  -8   0    6.00    4.20
   0   8   0    1.50    3.20
  -1  -8   0  168.28   15.30
  -1  -8   0  214.88   14.30
  -1  -8   0  211.08   13.70
   1   8   0  212.08   14.20
   1   8   0  214.68   16.40
  -2  -8   0   29.30    5.50
  -2  -8   0   32.40    7.80
   2   8   0   34.40    6.30
  -3  -8   0  274.97   20.00
  -3  -8   0  253.77   15.10
   3   8   0  266.87   16.10
   3   8   0  235.78   19.40
  -4  -8   0   37.10    6.00
  -4  -8   0   35.00    8.30
   4   8   0   38.90    6.70
  -5  -8   0   13.50    6.30
  -5  -8   0    9.30    3.70
   5   8   0   15.50    4.40
  -6  -8   0   20.60    4.00
  -6  -8   0   17.30    6.90
   6   8   0   21.60    4.60
   7  -9   0    4.00    5.20
   6  -9   0    3.80    4.10
   6  -9   0   -2.60    3.20
   5  -9   0   61.69   11.30
   5  -9   0   51.69    9.70
   4  -9   0   21.90    6.00
   4  -9   0   26.90    6.20
   4  -9   0   14.00    5.70
   3  -9   0  322.37   20.90
   3  -9   0  343.67   21.50
   3  -9   0  355.86   23.20
  -3   9   0  320.67   24.30
   2  -9   0  112.19   10.90
   2  -9   0  100.69   11.50
   2  -9   0  107.19   10.50
  -2   9   0  100.09   10.90
   1  -9   0    6.00    3.50
   1  -9   0   15.40    5.90
   1  -9   0    8.90    4.30
  -1   9   0    8.90    3.90
   0  -9   0    2.60    2.80
   0  -9   0    5.80    3.10
  -1  -9   0   13.20    6.20
   1   9   0   23.70    6.40
  -2  -9   0   15.70    6.00
  -2  -9   0    7.10    4.10
   2   9   0    2.50    4.30
  -3  -9   0   38.00    8.60
   3   9   0   31.30    7.90
  -4  -9   0  155.38   15.90
  -5  -9   0  126.29   15.10
   6 -10   0   38.60    9.10
   6 -10   0   18.70    7.30
   5 -10   0  154.08   15.50
   5 -10   0  135.29   14.00
   4 -10   0    5.10    4.00
   4 -10   0    6.70    4.30
   3 -10   0    5.70    4.50
   3 -10   0    7.90    4.40
  -3  10   0    4.00    4.00
   2 -10   0  775.62   38.30
   2 -10   0  774.72   40.60
  -2  10   0  850.01   40.60
   1 -10   0   -1.30    4.10
   1 -10   0   -0.80    3.10
  -1  10   0   -1.40    3.80
   0 -10   0   41.30    7.90
   0 -10   0   32.70    9.00
   0  10   0   31.50    7.30
  -1 -10   0    1.40    3.80
  -1 -10   0    5.20    5.80
  -1 -10   0    6.90    3.90
  -2 -10   0    1.90    4.00
  -2 -10   0   11.70    7.10
  -2 -10   0    7.80    4.30
  -3 -10   0    1.30    5.20
  -3 -10   0   -1.30    3.20
  -3 -10   0   -0.60    3.00
  -4 -10   0   -0.50    4.50
  -4 -10   0   -0.20    3.10
  -4 -10   0  -10.60    4.00
   5 -11   0   30.70    9.00
   5 -11   0   72.29   11.70
   4 -11   0    4.20    4.60
   4 -11   0    3.20    5.70
   3 -11   0   -2.80    4.40
   2 -11   0  158.68   14.90
   2 -11   0  167.58   16.80
   1 -11   0   31.80    8.50
   1 -11   0   43.60    8.70
   0 -11   0    4.00    4.50
   0 -11   0    4.60    4.20
  -1 -11   0   47.10    8.40
  -1 -11   0   30.00    9.40
  -2 -11   0   52.69    8.80
  -2 -11   0   37.10   10.50
  -3 -11   0   22.40    6.40
  -3 -11   0    3.00    6.60
   4 -12   0   24.20    8.60
   3 -12   0   -6.60    5.40
   3 -12   0   -3.40    4.30
   2 -12   0   18.00    7.00
   2 -12   0    6.40    6.90
   1 -12   0   -7.10    5.60
   1 -12   0   -1.90    4.10
   0 -12   0    7.80    5.30
   0 -12   0    0.60    6.10
  -1 -12   0  135.49   13.60
  -2 -12   0   12.60    5.50
  -2 -12   0    0.70    4.70
   0 -13   1   42.60    9.10
   0 -13   1   17.60    8.90
   1 -13   1   -6.40    6.10
  -2 -12   1   34.80   11.10
  -2 -12   1   42.90    8.30
  -1 -12   1    7.70    7.40
  -1 -12   1   19.00    6.50
   0 -12   1   56.89   10.00
   0 -12   1   43.40   12.10
   1 -12   1    9.10    6.30
   1 -12   1    9.60    7.10
   2 -12   1   29.00    9.20
   2 -12   1   12.20    6.20
   3 -12   1   23.70    8.10
   3 -12   1   26.50    9.00
   4 -12   1    6.00    4.90
   4 -12   1   -6.00    4.70
  -4 -11   1   -2.20    4.40
  -4 -11   1    0.70    4.40
  -3 -11   1   72.99   13.30
  -3 -11   1   89.29    9.50
  -2 -11   1   86.39   15.10
  -2 -11   1   85.19   11.10
  -1 -11   1   17.30    6.00
  -1 -11   1    9.20    6.50
   0 -11   1   30.80    9.70
   0 -11   1   39.70    8.30
   1 -11   1  306.37   23.80
   1 -11   1  292.77   20.40
   2 -11   1   29.30    7.40
   2 -11   1   17.20    6.50
   3 -11   1   21.40    6.50
   3 -11   1   26.10    7.80
   4 -11   1  237.88   20.90
   5 -11   1   41.50   12.60
   5 -11   1   52.09   11.10
  -5 -10   1   -6.60    2.90
  -5 -10   1    5.20    4.40
  -5 -10   1   -8.60    4.70
  -4 -10   1    2.70    4.00
  -4 -10   1    0.80    3.70
  -4 -10   1   -1.20    3.10
  -3 -10   1   58.89    8.90
  -3 -10   1   59.59   11.80
  -3 -10   1   54.49    7.90
  -2 -10   1    8.60    6.10
  -2 -10   1    8.70    4.30
  -2 -10   1    2.90    3.50
  -1 -10   1   33.70    9.30
  -1 -10   1   37.80    7.00
  -1 -10   1   21.00    5.30
   0  10  -1  190.98   16.30
   0 -10   1  176.48   17.10
   0 -10   1  167.38   13.40
   0 -10   1  147.59   12.90
  -1  10  -1   58.39   10.50
   1 -10   1   64.79   12.00
   1 -10   1   56.39    9.20
  -2  10  -1  182.28   15.70
   2 -10   1  195.38   15.40
   2 -10   1  198.78   17.50
   3 -10   1  230.68   17.40
   3 -10   1  209.38   18.20
   4 -10   1   -1.90    3.30
   4 -10   1    2.10    3.50
   5 -10   1  158.08   15.40
   5 -10   1  179.78   17.30
   6 -10   1    5.90    4.50
  -6  -9   1   -7.50    4.70
  -6  -9   1   -0.20    3.30
  -5  -9   1    6.70    6.00
  -5  -9   1    2.80    4.00
  -5  -9   1    8.00    3.60
  -4  -9   1   18.30    5.40
  -4  -9   1   19.40    7.20
  -4  -9   1   16.70    4.20
  -3  -9   1   40.30    7.50
  -3  -9   1   40.30    6.80
  -3  -9   1   55.09   10.90
   2   9  -1   40.70    9.00
  -2  -9   1   32.90    6.10
  -2  -9   1   33.40    8.60
  -2  -9   1   25.70    5.10
   1   9  -1  236.28   17.80
  -1  -9   1  225.98   15.00
  -1  -9   1  224.58   15.20
  -1  -9   1  183.78   17.20
   0  -9   1  253.47   22.30
  -1   9  -1   19.00    6.60
   1  -9   1   22.40    5.50
   1  -9   1   11.90    4.00
   2  -9   1  125.89   11.60
   2  -9   1  105.49   13.60
   2  -9   1  106.69   10.70
  -3   9  -1   25.90    6.70
   3  -9   1   29.90    7.00
   3  -9   1   32.50    6.90
   3  -9   1   30.00    7.50
   4  -9   1    0.70    4.50
   4  -9   1   12.50    4.70
   4  -9   1    2.10    4.30
   5  -9   1   30.00    7.40
   5  -9   1   14.10    5.40
   6  -9   1    4.50    5.00
   6  -9   1    4.60    4.70
   7  -9   1    3.70    5.20
   7  -9   1   -5.50    4.00
  -6  -8   1   32.00    5.00
  -6  -8   1   34.70    6.20
  -6  -8   1   28.50    7.90
  -5  -8   1   54.79    6.20
  -5  -8   1   68.19    7.10
  -5  -8   1   76.69   13.10
  -4  -8   1   36.20    6.00
  -4  -8   1   29.20    7.80
  -4  -8   1   32.50    5.40
   3   8  -1   45.10    9.50
  -3  -8   1   57.09    6.60
  -3  -8   1   47.90    6.60
  -3  -8   1   59.49   10.90
  -2  -8   1 1338.47   54.39
  -2  -8   1 1427.26   54.09
   1   8  -1  561.24   30.10
  -1  -8   1  586.34   27.10
  -1  -8   1  513.95   30.10
  -1  -8   1  559.74   26.30
   0   8  -1  137.19   12.40
   0  -8   1  137.99   11.10
   0  -8   1  143.19   13.30
   0  -8   1  129.79   10.70
  -1   8  -1    6.40    3.20
   1  -8   1    9.60    4.20
   1  -8   1    7.30    3.20
   1  -8   1    7.30    3.40
  -2   8  -1    5.40    3.20
   2  -8   1   12.30    4.20
   2  -8   1   12.70    4.20
   2  -8   1    2.90    3.00
  -3   8  -1   23.80    5.80
   3  -8   1   29.20    6.70
   3  -8   1   24.70    6.60
   3  -8   1   13.30    5.10
   4  -8   1    1.00    2.80
   4  -8   1    3.80    2.80
   4  -8   1   -7.70    2.30
   4  -8   1   -2.30    2.50
   5  -8   1  257.87   19.80
   5  -8   1  285.77   19.30
   5  -8   1  268.07   18.60
   6  -8   1   24.40    8.00
   6  -8   1   14.20    5.00
   7  -8   1    8.00    5.00
   7  -8   1    6.90    4.10
  -7  -7   1   31.00    8.80
  -7  -7   1   56.69    5.20
  -7  -7   1   44.70    5.80
  -6  -7   1   41.00    9.00
  -6  -7   1   30.30    4.50
   5   7  -1    2.90    2.60
  -5  -7   1   -2.40    3.60
  -5  -7   1   -0.80    1.70
   4   7  -1  140.79   16.00
   4   7  -1  117.99    9.10
  -4  -7   1  133.29   12.90
  -4  -7   1  138.19    9.10
   3   7  -1   81.99   10.80
   3   7  -1   81.39    7.30
  -3  -7   1   80.09    7.00
  -3  -7   1  109.39   13.70
   2   7  -1    7.50    4.70
  -2  -7   1   12.10    3.50
  -2  -7   1    7.60    4.90
  -2  -7   1   12.70    3.30
   1   7  -1   72.59    8.50
  -1  -7   1   69.29    6.80
  -1  -7   1   53.39    9.20
  -1  -7   1   66.29    6.70
   0   7  -1   17.50    4.70
   0  -7   1   16.70    4.20
   0  -7   1   17.90    4.30
   0  -7   1   20.90    5.60
  -1   7  -1    1.20    1.60
   1  -7   1    0.00    2.20
   1  -7   1    1.30    2.80
   1  -7   1    2.50    2.20
  -2   7  -1  301.87   18.10
   2  -7   1  281.37   16.90
   2  -7   1  292.77   17.20
   2  -7   1  286.97   18.30
  -3   7  -1  659.43   30.70
   3  -7   1  586.04   30.30
   3  -7   1  593.34   28.80
   3  -7   1  599.44   29.30
   4  -7   1  169.48   13.30
   4  -7   1  192.48   15.10
   4  -7   1  178.08   13.60
   4  -7   1  174.88   13.00
   5  -7   1   11.70    4.50
   5  -7   1   11.50    5.10
   5  -7   1   18.90    4.60
   5  -7   1   17.40    4.90
   6  -7   1   12.10    5.30
   6  -7   1   14.20    6.10
   6  -7   1    4.40    3.50
   7  -7   1   -3.70    2.80
   7  -7   1   -1.30    2.80
   8  -7   1    8.40    4.60
   8  -7   1    4.10    6.00
  -7  -6   1   -5.10    3.90
   6   6  -1   42.30    4.60
  -6  -6   1   39.60    4.30
  -6  -6   1   36.50    8.90
   5   6  -1   49.90    5.10
  -5  -6   1   48.70    4.80
  -5  -6   1   50.89    9.60
   4   6  -1   18.80    3.60
   4   6  -1    8.40    6.10
  -4  -6   1   11.80    4.70
  -4  -6   1   10.90    2.80
   3   6  -1   82.79   10.00
   3   6  -1   82.69    7.10
  -3  -6   1  104.59   10.60
  -3  -6   1   95.29    7.00
   2   6  -1  312.57   19.10
   2   6  -1  303.47   15.80
  -2  -6   1  269.17   18.30
  -2  -6   1  319.87   15.30
   1   6  -1    5.40    2.90
  -1  -6   1    3.60    1.90
  -1  -6   1    3.70    2.90
  -1  -6   1    3.70    2.10
   0   6  -1   73.79    7.50
   0  -6   1   63.59    6.20
   0  -6   1   68.89    7.70
   0  -6   1   53.09    6.00
  -1   6  -1  387.46   20.60
   1  -6   1  400.16   21.30
   1  -6   1  392.66   19.50
   1  -6   1  403.26   19.90
  -2   6  -1  421.86   21.10
   2  -6   1  377.26   19.40
   2  -6   1  346.57   19.30
   2  -6   1  388.76   20.90
   3  -6   1  154.58   11.70
   3  -6   1  176.08   12.90
   3  -6   1  158.98   11.20
   3  -6   1  159.68   11.70
   4  -6   1   22.70    5.30
   4  -6   1   22.10    5.80
   4  -6   1   24.70    5.20
   4  -6   1   21.10    5.10
   5  -6   1   -1.60    2.30
   5  -6   1   -3.50    2.30
   5  -6   1    2.10    2.80
   5  -6   1    3.70    2.60
   6  -6   1  102.79   10.70
   6  -6   1   89.59    9.20
   6  -6   1  102.09   10.40
   6  -6   1  109.69   12.10
   7  -6   1  203.38   14.60
   7  -6   1  174.68   14.50
   7  -6   1  204.28   18.00
   8  -6   1    8.00    4.50
   8  -6   1   -4.00    5.10
  -8  -5   1   53.09   12.20
   7   5  -1   11.60    2.50
  -7  -5   1   11.30    2.20
  -7  -5   1   13.00    6.00
   6   5  -1   13.30    2.40
  -6  -5   1    8.90    2.30
  -6  -5   1   15.50    5.40
   5   5  -1   22.10    3.60
   5   5  -1   15.80    5.70
  -5  -5   1   22.70    5.70
   4   5  -1  379.96   25.30
   4   5  -1  493.55   20.40
  -4  -5   1  537.45   26.70
   3   5  -1   22.00    3.60
   3   5  -1   16.60    4.80
  -3  -5   1   12.70    4.40
   2   5  -1    1.20    1.40
   2   5  -1    3.70    2.30
  -2  -5   1    1.00    1.30
  -2  -5   1    9.50    4.30
   1   5  -1   -1.60    1.10
   1   5  -1    0.20    1.60
  -1  -5   1    0.80    1.60
  -1  -5   1    2.30    1.50
   0   5  -1  319.47   17.30
   0  -5   1  326.17   15.90
   0  -5   1  307.67   15.70
   0  -5   1  343.97   18.10
  -1   5  -1  865.71   36.60
   1  -5   1  895.01   35.70
   1  -5   1  900.81   35.90
   1  -5   1  917.11   37.30
  -2   5  -1   70.49    7.10
   2  -5   1   69.99    6.40
   2  -5   1   77.49    7.50
   2  -5   1   82.99    7.30
  -3   5  -1  110.59    9.10
   3  -5   1  127.89    9.10
   3  -5   1  114.89    9.70
   3  -5   1  126.29    9.60
  -4   5  -1   -0.80    1.90
   4  -5   1    2.60    2.10
   4  -5   1    0.50    1.60
   4  -5   1    2.50    2.10
  -5   5  -1   70.99    7.80
   5  -5   1   65.79    8.40
   5  -5   1   70.19    8.20
   5  -5   1   72.49    7.20
  -6   5  -1   32.80    6.30
   6  -5   1   43.70    6.40
   6  -5   1   47.70    8.50
   6  -5   1   52.49    9.40
   7  -5   1  399.26   22.50
   7  -5   1  378.76   20.60
   7  -5   1  377.66   25.50
   8  -5   1   18.50    5.40
   8  -5   1    3.80    5.80
   8  -5   1   14.60    4.90
  -8  -4   1   78.79   13.30
   7   4  -1    1.40    1.40
  -7  -4   1    1.90    1.40
  -7  -4   1    7.60    4.20
   6   4  -1    2.50    1.70
  -6  -4   1   -0.30    1.40
  -6  -4   1   -2.70    3.00
   5   4  -1   86.79    5.80
   5   4  -1   84.59   10.60
  -5  -4   1   87.89    5.40
  -5  -4   1   87.99    9.90
   4   4  -1    2.10    1.20
   4   4  -1   -3.00    2.50
  -4  -4   1   -1.00    0.70
  -4  -4   1    1.00    2.20
   3   4  -1  518.75   21.10
   3   4  -1  433.76   25.30
  -3  -4   1  568.74   20.70
  -3  -4   1  579.64   26.30
   2   4  -1  383.66   20.80
   2   4  -1  410.36   17.40
  -2  -4   1  418.26   21.00
  -2  -4   1  431.26   17.20
   1   4  -1  539.15   24.00
   1   4  -1  530.05   21.40
  -1  -4   1  541.55   21.30
  -1  -4   1  471.65   23.60
   0   4  -1  181.88   11.00
   0  -4   1  189.98   11.40
   0  -4   1  188.08   10.00
   0  -4   1  184.48   10.00
  -1   4  -1   82.49    6.60
   1  -4   1   73.99    6.00
   1  -4   1   80.79    6.90
  -2   4  -1   66.09    6.00
  -2   4  -1   76.99    6.80
   2  -4   1   68.59    5.80
   2  -4   1   64.39    6.40
  -3   4  -1  266.57   14.50
   3  -4   1  252.17   15.40
   3  -4   1  287.17   15.80
  -4   4  -1  172.58   11.40
   4  -4   1  172.48   11.90
   4  -4   1  159.58   12.10
   4  -4   1  170.58   10.70
  -5   4  -1   36.90    6.30
   5  -4   1   28.50    6.00
   5  -4   1   46.20    8.10
   5  -4   1   34.10    5.40
  -6   4  -1    9.70    4.80
  -6   4  -1   15.90    4.60
   6  -4   1   13.90    4.20
   6  -4   1   17.90    5.20
   6  -4   1   13.60    4.50
  -7   4  -1   78.59   10.00
  -7   4  -1   73.09    8.40
   7  -4   1   76.89    7.50
  -8   4  -1   35.80    8.90
   8  -4   1   27.10    4.90
  -8  -3   1   -4.10    4.60
   7   3  -1   30.30    3.00
  -7  -3   1   34.00    8.10
  -7  -3   1   27.90    2.80
   6   3  -1  180.08    8.60
   6   3  -1  181.38   15.90
  -6  -3   1  166.18    8.30
  -6  -3   1  191.58   15.00
   5   3  -1    1.90    1.20
   5   3  -1   -1.70    1.90
  -5  -3   1   -0.90    1.70
  -5  -3   1    1.80    1.00
   4   3  -1   94.09    5.30
   4   3  -1   83.19    8.90
  -4  -3   1   92.79    5.00
  -4  -3   1   82.99    8.30
   3   3  -1 1115.39   41.20
  -3  -3   1 1165.08   40.90
  -3  -3   1 1238.98   46.80
   2   3  -1  660.33   32.00
   2   3  -1  795.12   28.80
  -2  -3   1  823.22   28.50
  -2  -3   1  868.11   33.10
   1   3  -1  310.67   15.10
   1   3  -1  307.67   12.90
  -1  -3   1  278.77   14.80
  -1  -3   1  313.17   12.80
   0   3  -1  620.04   24.80
   0  -3   1  601.94   24.80
   0  -3   1  614.34   23.60
   0  -3   1  599.94   23.50
  -1   3  -1  112.09    7.30
  -1   3  -1  111.59    6.90
   1  -3   1  110.39    6.80
   1  -3   1  109.19    7.30
  -2   3  -1  453.35   19.50
   2  -3   1  454.45   20.30
   2  -3   1  456.95   19.90
   2  -3   1  445.36   19.20
  -3   3  -1  413.26   18.90
   3  -3   1  427.36   19.90
   3  -3   1  416.46   20.20
   3  -3   1  411.36   18.50
  -4   3  -1  939.31   39.80
  -4   3  -1  949.80   38.00
   4  -3   1  960.60   39.70
   4  -3   1  991.90   37.50
  -5   3  -1   62.89    7.70
  -5   3  -1   64.79    6.40
   5  -3   1   62.39    5.70
   5  -3   1   53.49    6.80
  -6   3  -1    0.60    2.10
  -6   3  -1    0.10    1.80
   6  -3   1   -1.30    2.40
   6  -3   1   -1.00    1.40
  -7   3  -1   -1.70    2.40
  -7   3  -1   -0.50    2.90
   7  -3   1    0.80    1.90
  -8   3  -1   -2.00    3.00
  -8   3  -1    0.90    3.60
   8  -3   1    4.60    3.40
   8   2  -1    0.50    2.20
  -8  -2   1   -3.80    3.90
   7   2  -1  295.47   12.70
  -7  -2   1  322.87   21.50
  -7  -2   1  315.27   13.10
   6   2  -1  332.77   13.60
   6   2  -1  331.07   21.40
  -6  -2   1  331.27   13.80
  -6  -2   1  340.37   21.00
   5   2  -1  337.67   20.00
   5   2  -1  326.77   13.10
  -5  -2   1  326.37   19.20
  -5  -2   1  320.37   13.20
   4   2  -1  368.26   14.60
   4   2  -1  415.26   21.00
  -4  -2   1  384.16   19.90
  -4  -2   1  384.66   14.70
   3   2  -1  342.77   17.40
   3   2  -1  329.77   12.50
  -3  -2   1  318.97   16.50
  -3  -2   1  324.87   12.40
   2   2  -1   25.20    2.00
   2   2  -1   22.40    4.10
  -2  -2   1   24.60    1.80
  -2  -2   1   25.20    4.00
   1   2  -1  540.55   18.50
   1   2  -1  513.35   20.70
  -1  -2   1  526.65   18.40
  -1  -2   1  417.76   20.00
   0   2  -1  272.57   11.10
   0   2  -1  263.37   11.80
   0  -2   1  268.67   11.90
   0  -2   1  263.57   11.00
  -1   2  -1   75.99    4.90
  -1   2  -1   74.69    5.20
   1  -2   1   83.99    5.40
   1  -2   1   82.19    5.00
  -2   2  -1    6.70    1.80
  -2   2  -1    8.20    2.10
   2  -2   1    9.20    2.30
   2  -2   1    5.70    1.70
  -3   2  -1  441.66   20.40
  -3   2  -1  449.56   19.10
   3  -2   1  436.26   18.50
   3  -2   1  452.95   20.40
  -4   2  -1    5.60    2.70
  -4   2  -1    2.60    1.80
   4  -2   1    4.20    1.80
   4  -2   1    3.00    2.10
  -5   2  -1   65.69    7.80
  -5   2  -1   59.99    6.00
   5  -2   1   52.99    5.90
   5  -2   1   67.49    7.50
  -6   2  -1   49.90   10.70
  -6   2  -1   47.00    6.40
   6  -2   1   35.90    5.30
  -7   2  -1  150.38   11.00
  -7   2  -1  145.89   13.70
   7  -2   1  142.49    9.60
  -8   2  -1   42.20    6.90
  -8   2  -1   25.80    7.70
   8  -2   1   30.90    5.10
  -9  -1   1   12.70    5.90
   8   1  -1   14.60    2.50
  -8  -1   1   29.40    7.90
   7   1  -1   87.69    5.50
  -7  -1   1   99.59   10.90
  -7  -1   1   85.99    5.80
   6   1  -1   13.10    2.20
   6   1  -1   14.50    5.10
  -6  -1   1   11.50    2.40
  -6  -1   1   17.70    5.00
   5   1  -1   14.70    4.10
   5   1  -1   10.90    1.90
  -5  -1   1    6.60    3.20
  -5  -1   1    7.90    1.70
   4   1  -1   73.89    7.20
   4   1  -1   81.99    4.20
  -4  -1   1   79.59    4.40
  -4  -1   1   77.59    7.40
   3   1  -1  466.25   16.60
   3   1  -1  489.75   21.20
  -3  -1   1  462.85   16.70
  -3  -1   1  444.06   20.80
   2   1  -1  809.32   30.20
   2   1  -1  777.52   26.40
  -2  -1   1  761.82   26.40
  -2  -1   1  778.82   29.80
   1   1  -1 1326.77   50.89
  -1  -1   1 1525.35   51.19
  -1  -1   1 1536.65   48.90
   0   1  -1    0.20    0.30
   0   1  -1    0.20    0.20
  -1   1  -1 9999.00  368.36
   1  -1   1 9753.12  366.66
  -2   1  -1 2951.20  101.59
  -2   1  -1 2969.80  100.09
   2  -1   1 2952.00  101.59
   2  -1   1 2915.11   99.89
  -3   1  -1    3.30    1.90
  -3   1  -1    1.30    1.40
   3  -1   1    0.20    0.90
   3  -1   1   -0.20    1.10
  -4   1  -1  404.26   17.80
  -4   1  -1  414.36   20.70
   4  -1   1  406.06   20.50
   4  -1   1  415.96   17.40
  -5   1  -1   53.59    6.80
  -5   1  -1   56.19    5.20
   5  -1   1   42.90    7.20
   5  -1   1   48.10    4.50
  -6   1  -1   12.60    3.40
  -6   1  -1    6.40    4.80
   6  -1   1    7.10    4.30
   6  -1   1    9.40    2.50
  -7   1  -1   53.99    6.30
  -7   1  -1   66.09   10.90
   7  -1   1   65.19    5.60
  -8   1  -1   10.70    3.70
  -8   1  -1   15.80    6.40
   8  -1   1    6.50    2.50
   9   0  -1   -3.70    1.50
   9   0  -1   -2.20    2.10
  -9   0   1    0.40    4.70
   8   0  -1   56.79    4.50
  -8   0   1   59.39   10.70
   7   0  -1  210.88   16.70
   7   0  -1  203.38   10.30
  -7   0   1  232.88   17.10
  -7   0   1  235.38   12.60
   6   0  -1   17.60    5.10
   6   0  -1   20.90    2.90
  -6   0   1    9.20    4.00
  -6   0   1   14.10    2.70
   5   0  -1  107.89    5.90
   5   0  -1  110.79    9.50
  -5   0   1  100.79    9.20
  -5   0   1  102.29    6.20
   4   0  -1   58.59    6.90
   4   0  -1   58.29    3.70
  -4   0   1   44.60    5.30
  -4   0   1   60.89    4.00
   3   0  -1  819.02   28.90
   3   0  -1  830.62   32.60
  -3   0   1  839.72   29.30
  -3   0   1  822.02   32.50
   2   0  -1 1910.51   65.09
  -2   0   1 1844.92   62.69
  -2   0   1 1842.12   64.89
  -1   0  -1 2305.67   80.09
   1   0   1 2404.36   80.19
  -2   0  -1  945.41   32.70
  -2   0  -1  894.91   34.50
   2   0   1  916.41   32.50
   2   0   1  917.91   34.60
  -3   0  -1 1378.36   48.30
  -3   0  -1 1385.46   51.49
   3   0   1 1351.66   51.29
   3   0   1 1350.66   48.00
  -4   0  -1    2.60    2.30
  -4   0  -1    6.90    1.80
   4   0   1    2.50    1.80
   4   0   1    5.10    1.50
  -5   0  -1  121.49    7.80
  -5   0  -1  123.49   10.70
   5   0   1  112.69   10.10
   5   0   1  123.19    7.30
  -6   0  -1    8.60    2.80
  -6   0  -1    0.70    1.60
   6   0   1    2.80    2.80
   6   0   1    4.40    1.80
  -7   0  -1   47.30    9.40
  -7   0  -1   43.30    6.00
  -8   0  -1  120.39   13.50
  -8   0  -1  106.59    8.80
   8   0   1  102.89    7.60
   9  -1  -1   13.80    3.40
  -9   1   1   19.20    7.60
   8  -1  -1   25.90    4.50
  -8   1   1   33.90    8.60
   7  -1  -1  136.39   12.70
   7  -1  -1  120.09    7.60
  -7   1   1  139.99   12.60
   6  -1  -1   -0.60    1.10
   6  -1  -1    2.10    2.30
  -6   1   1    0.80    2.20
  -6   1   1    0.10    1.80
   5  -1  -1   16.10    4.10
   5  -1  -1   15.60    2.70
  -5   1   1   10.10    2.50
  -5   1   1   13.20    4.10
   4  -1  -1    8.30    2.50
   4  -1  -1    8.30    1.90
  -4   1   1    8.30    3.00
  -4   1   1    5.40    2.00
   3  -1  -1   54.29    3.80
   3  -1  -1   52.79    4.80
  -3   1   1   52.69    4.80
  -3   1   1   50.79    3.80
   2  -1  -1   56.89    3.60
   2  -1  -1   55.99    3.50
   2  -1  -1   50.29    3.90
  -2   1   1   51.89    3.90
   1  -1  -1  342.27   13.20
   1  -1  -1  356.06   13.00
   1  -1  -1  356.86   13.10
  -1   1   1  341.87   13.20
  -1  -1  -1 2402.36   81.89
  -1  -1  -1 2386.36   80.59
   1   1   1 2417.16   81.99
   1   1   1 2357.36   80.59
  -2  -1  -1  727.23   29.10
  -2  -1  -1  738.23   26.70
   2   1   1  746.63   26.70
   2   1   1  755.72   29.30
  -3  -1  -1  142.49    7.20
  -3  -1  -1  134.19    9.50
   3   1   1  144.09    9.80
   3   1   1  135.89    7.00
  -4  -1  -1   76.79    5.20
  -4  -1  -1   67.39    7.30
   4   1   1   77.59    5.10
   4   1   1   77.09    7.60
  -5  -1  -1    4.10    2.50
  -5  -1  -1    3.50    1.70
   5   1   1    0.60    1.70
   5   1   1    3.80    1.40
  -6  -1  -1  167.98   14.00
  -6  -1  -1  156.98    9.50
   6   1   1  160.08    9.00
   6   1   1  149.79   13.50
  -7  -1  -1  247.58   13.60
  -7  -1  -1  263.57   19.80
   7   1   1  273.67   14.50
  -8  -1  -1   11.60    3.50
   8   1   1    2.40    2.20
   9  -2  -1    6.40    3.90
   9  -2  -1    7.60    2.70
  -9   2   1   14.40    6.60
   8  -2  -1  115.69    7.80
   8  -2  -1  125.59    9.40
  -8   2   1  108.99   12.30
   7  -2  -1   -1.60    1.70
   7  -2  -1   -2.30    1.80
   7  -2  -1    3.00    3.20
  -7   2   1   -0.60    1.70
   6  -2  -1  198.88   10.50
   6  -2  -1  186.38   13.80
  -6   2   1  180.38   13.90
   5  -2  -1   53.59    6.10
   5  -2  -1   52.69    4.60
  -5   2   1   54.79    5.10
  -5   2   1   45.00    6.20
   4  -2  -1    9.80    2.30
   4  -2  -1   11.60    3.40
  -4   2   1   10.80    3.00
  -4   2   1    7.00    2.20
   3  -2  -1 2390.66   81.99
   3  -2  -1 2361.06   82.19
   3  -2  -1 2346.07   83.19
  -3   2   1 2369.16   83.39
   2  -2  -1  108.39    6.30
   2  -2  -1  107.79    6.40
   2  -2  -1  112.19    6.40
   2  -2  -1  111.69    6.60
   1  -2  -1    0.30    0.80
   1  -2  -1    1.30    1.00
  -1   2   1    1.00    0.80
   0  -2  -1 1321.37   48.40
   0  -2  -1 1376.16   48.00
   0   2   1 1381.06   48.10
   0   2   1 1422.06   48.60
  -1  -2  -1    9.10    2.10
  -1  -2  -1    4.90    1.30
   1   2   1    5.20    2.00
   1   2   1    5.70    1.50
  -2  -2  -1 1159.68   43.30
  -2  -2  -1 1096.69   40.20
   2   2   1 1121.09   40.40
   2   2   1 1183.68   43.80
  -3  -2  -1 1244.98   44.20
  -3  -2  -1 1213.28   48.20
   3   2   1 1219.78   44.20
   3   2   1 1301.87   52.29
  -4  -2  -1   11.30    3.60
  -4  -2  -1   15.10    2.80
   4   2   1   11.50    2.30
   4   2   1   16.50    4.40
  -5  -2  -1   64.59    7.90
  -5  -2  -1   68.99    5.20
   5   2   1   77.39    8.80
   5   2   1   64.39    5.10
  -6  -2  -1  102.39    7.10
  -6  -2  -1   83.89   10.10
   6   2   1  105.19   11.20
   6   2   1   91.99    6.50
  -7  -2  -1  289.37   21.20
  -7  -2  -1  301.07   14.90
  -8  -2  -1    2.60    4.30
  -8  -2  -1    4.50    2.90
   9  -3  -1   -6.20    2.60
   9  -3  -1   -2.60    2.90
  -9   3   1   15.40    7.60
   8  -3  -1  136.49   10.90
   8  -3  -1  157.88   10.20
  -8   3   1  167.68   15.80
   7  -3  -1   80.89    7.90
   7  -3  -1   76.49    9.50
   7  -3  -1   89.49    7.00
  -7   3   1   94.49   10.50
   6  -3  -1    3.20    2.10
   6  -3  -1    2.70    2.10
   6  -3  -1    4.70    2.90
  -6   3   1    6.30    3.60
   5  -3  -1   93.79    7.60
   5  -3  -1   96.09    7.50
   5  -3  -1   99.99    8.80
  -5   3   1  102.69    8.90
   4  -3  -1  324.27   15.70
   4  -3  -1  327.67   15.50
  -4   3   1  298.97   16.40
   3  -3  -1 1517.55   55.39
   3  -3  -1 1498.75   54.79
   2  -3  -1  117.29    7.30
   2  -3  -1  105.29    7.00
   2  -3  -1  110.89    6.90
   2  -3  -1  111.99    7.20
   1  -3  -1  379.56   16.50
   1  -3  -1  384.66   16.40
  -1   3   1  375.06   16.40
  -1   3   1  388.76   16.40
   0  -3  -1   42.00    4.30
   0  -3  -1   52.09    4.10
   0   3   1   47.20    4.00
   0   3   1   47.60    4.40
  -1  -3  -1   13.30    2.40
  -1  -3  -1   15.40    3.30
   1   3   1   14.40    2.60
   1   3   1    7.20    2.40
  -2  -3  -1  867.71   31.00
  -2  -3  -1  891.91   34.50
   2   3   1  739.43   34.10
   2   3   1  829.42   31.20
  -3  -3  -1  532.75   21.10
  -3  -3  -1  530.75   24.90
   3   3   1  500.35   21.10
   3   3   1  559.14   26.20
  -4  -3  -1   76.49    8.10
   4   3   1   72.59    5.50
   4   3   1   79.79    8.60
  -5  -3  -1   19.90    5.70
  -5  -3  -1   15.60    3.20
   5   3   1   16.80    3.10
   5   3   1   13.00    4.80
  -6  -3  -1   22.60    3.70
  -6  -3  -1   12.50    5.00
   6   3   1   18.20    3.50
  -7  -3  -1   -2.20    1.90
  -7  -3  -1    2.70    3.70
  -8  -3  -1  103.99    8.10
  -8  -3  -1   88.69   14.80
   8  -4  -1    1.10    2.40
   8  -4  -1   -6.80    2.20
  -8   4   1   -1.10    3.70
   7  -4  -1   -2.10    2.40
   7  -4  -1    4.00    2.10
   7  -4  -1   -3.40    2.00
  -7   4   1    2.80    3.80
   6  -4  -1  172.48   13.30
   6  -4  -1  185.28   12.40
   6  -4  -1  197.68   14.90
   6  -4  -1  182.18   11.70
  -6   4   1  184.78   14.00
   5  -4  -1   37.30    5.50
   5  -4  -1   34.30    6.50
   5  -4  -1   33.50    5.80
   5  -4  -1   21.90    4.50
   4  -4  -1    0.60    1.90
   4  -4  -1    3.60    2.30
   4  -4  -1    0.20    1.50
   4  -4  -1   -1.80    1.50
   3  -4  -1  198.78   12.20
   3  -4  -1  215.18   12.20
   3  -4  -1  207.18   11.80
   3  -4  -1  207.18   11.90
   2  -4  -1  534.85   22.80
   2  -4  -1  503.75   22.70
   2  -4  -1  525.25   22.80
  -2   4   1  535.55   22.80
   1  -4  -1  380.16   17.20
   1  -4  -1  378.56   17.60
  -1   4   1  373.66   17.30
  -1   4   1  367.06   17.20
   0  -4  -1  533.05   23.60
   0   4   1  536.15   23.50
   0   4   1  547.85   22.70
  -1  -4  -1  443.16   22.00
   1   4   1  493.05   20.40
   1   4   1  487.95   22.50
  -2  -4  -1  845.82   32.50
  -2  -4  -1  896.61   36.10
   2   4   1  799.32   32.50
  -3  -4  -1  113.59    9.80
  -3  -4  -1  126.59    7.50
   3   4   1   91.69    9.70
   3   4   1  120.69    7.70
  -4  -4  -1    5.60    2.80
  -4  -4  -1    1.00    1.40
   4   4   1    3.30    1.80
   4   4   1    5.90    3.90
  -5  -4  -1   53.19    5.00
  -5  -4  -1   51.39    8.80
   5   4   1   56.39   10.40
   5   4   1   51.69    5.20
  -6  -4  -1    0.60    1.50
  -6  -4  -1    0.10    3.40
   6   4   1   -0.40    3.10
  -7  -4  -1   34.30    4.80
  -7  -4  -1   30.40    8.10
   7   4   1   27.60    4.50
  -8  -4  -1   52.49    6.00
   8  -5  -1   24.60    5.60
   8  -5  -1   47.50   10.40
   8  -5  -1   38.50    7.20
   7  -5  -1   43.80    6.70
   7  -5  -1   36.30    7.90
   7  -5  -1   23.60    5.50
   6  -5  -1  126.49   11.20
   6  -5  -1  107.69    9.80
   6  -5  -1  114.29    9.70
   6  -5  -1  122.59   11.80
   5  -5  -1   35.80    6.20
   5  -5  -1   33.60    6.80
   5  -5  -1   27.50    5.90
   5  -5  -1   33.40    5.90
   4  -5  -1   29.70    5.70
   4  -5  -1   33.00    6.10
   4  -5  -1   29.60    5.50
   4  -5  -1   33.30    5.40
   3  -5  -1    2.40    2.10
   3  -5  -1    2.10    1.90
   3  -5  -1    3.30    1.90
   3  -5  -1    3.00    1.80
   2  -5  -1   14.10    3.80
   2  -5  -1   10.40    3.20
   2  -5  -1   17.00    3.60
  -2   5   1   15.20    3.80
   1  -5  -1   10.10    3.20
   1  -5  -1    9.30    3.10
  -1   5   1   15.60    4.10
  -1   5   1    8.90    2.90
   0  -5  -1  421.36   19.60
   0  -5  -1  437.16   21.50
   0   5   1  418.56   19.80
   0   5   1  438.16   21.10
  -1  -5  -1 1277.47   55.79
  -1  -5  -1 1492.05   53.69
   1   5   1 1561.34   60.49
   1   5   1 1490.25   54.29
  -2  -5  -1  162.78   12.00
  -2  -5  -1  170.48    9.60
   2   5   1  137.69   11.60
   2   5   1  147.69    9.60
  -3  -5  -1   36.00    4.20
  -3  -5  -1   48.80    7.80
   3   5   1   39.90    6.30
   3   5   1   46.80    8.70
  -4  -5  -1   30.60    6.80
  -4  -5  -1   27.80    4.40
   4   5   1   24.50    7.30
   4   5   1   30.10    4.70
  -5  -5  -1    4.30    2.00
  -5  -5  -1   -0.40    2.50
   5   5   1   -0.50    3.00
   5   5   1   -1.80    1.70
  -6  -5  -1   20.30    4.00
  -6  -5  -1   20.40    6.90
   6   5   1   22.90    4.50
  -7  -5  -1    2.20    2.50
  -7  -5  -1    5.10    4.50
   7   5   1    1.80    2.00
   8  -6  -1   47.60    8.20
   8  -6  -1   48.40   10.30
   7  -6  -1   25.40    5.80
   7  -6  -1   24.00    6.40
   7  -6  -1   20.00    6.20
   6  -6  -1   51.59    9.60
   6  -6  -1   59.79    9.80
   6  -6  -1   66.19    8.80
   6  -6  -1   60.19    7.70
   5  -6  -1   -1.30    2.00
   5  -6  -1    4.60    2.90
   5  -6  -1    1.40    2.40
   5  -6  -1    3.00    2.90
   4  -6  -1   92.19    8.40
   4  -6  -1   66.59    7.20
   4  -6  -1   62.79    7.80
   4  -6  -1   79.29    8.00
   3  -6  -1  405.56   20.90
   3  -6  -1  376.36   20.40
   3  -6  -1  402.36   21.30
  -3   6   1  427.76   21.30
   2  -6  -1  102.49    9.00
   2  -6  -1  105.09    8.70
   2  -6  -1   95.79    8.40
  -2   6   1   99.89    8.80
   1  -6  -1  387.26   20.30
   1  -6  -1  381.16   19.20
  -1   6   1  360.96   19.10
   0  -6  -1   12.40    3.30
   0  -6  -1   18.40    5.00
   0   6   1   15.30    4.20
   0   6   1   16.60    3.80
  -1  -6  -1  144.89    9.80
  -1  -6  -1  137.99   11.70
   1   6   1  155.58   12.00
   1   6   1  147.29   10.20
  -2  -6  -1  200.18   14.20
  -2  -6  -1  161.98   10.50
   2   6   1  181.88   14.20
   2   6   1  166.48   11.10
  -3  -6  -1  245.68   13.30
  -3  -6  -1  230.18   16.40
   3   6   1  234.08   17.60
   3   6   1  237.88   13.70
  -4  -6  -1   33.10    7.70
  -4  -6  -1   31.50    4.80
   4   6   1   33.70    5.30
   4   6   1   22.60    7.00
  -5  -6  -1  125.59   12.90
  -5  -6  -1  135.99    9.20
   5   6   1  137.79    9.70
  -6  -6  -1   34.20    5.40
  -6  -6  -1   26.80    7.10
   6   6   1   37.60    5.80
  -7  -6  -1   32.40    9.10
   8  -7  -1    3.60    4.40
   8  -7  -1    4.00    5.90
   7  -7  -1   30.10    6.50
   7  -7  -1   17.60    6.90
   6  -7  -1    6.20    3.50
   6  -7  -1    2.60    4.00
   6  -7  -1    3.40    3.10
   6  -7  -1   -0.10    2.80
   5  -7  -1  298.77   19.50
   5  -7  -1  282.67   17.80
   5  -7  -1  270.37   17.80
   5  -7  -1  275.27   17.90
   4  -7  -1  256.77   17.40
   4  -7  -1  279.27   17.30
   4  -7  -1  257.77   16.70
   4  -7  -1  287.37   17.20
   3  -7  -1    1.00    2.50
   3  -7  -1    4.00    2.90
   3  -7  -1    0.60    2.60
  -3   7   1    6.60    3.20
   2  -7  -1   -0.40    2.00
   2  -7  -1    2.40    2.20
   2  -7  -1   -3.50    1.30
  -2   7   1   -3.00    1.60
   1  -7  -1  159.48   11.60
   1  -7  -1  168.78   13.00
   1  -7  -1  150.98   11.50
  -1   7   1  173.78   12.60
   0  -7  -1    4.30    2.70
   0  -7  -1    0.80    3.00
   0   7   1    1.80    1.90
   0   7   1    3.20    1.90
  -1  -7  -1  295.27   16.30
  -1  -7  -1  268.57   18.60
   1   7   1  314.67   19.20
   1   7   1  296.07   16.80
  -2  -7  -1   50.59    9.00
  -2  -7  -1   54.59    7.20
   2   7   1   52.49    9.30
   2   7   1   58.29    6.40
  -3  -7  -1  528.15   23.50
  -3  -7  -1  531.35   28.50
   3   7   1  474.55   29.20
   3   7   1  458.35   23.60
  -4  -7  -1   30.10    4.90
  -4  -7  -1   30.70    7.60
   4   7   1   28.60    5.50
  -5  -7  -1  110.89    8.70
  -5  -7  -1   92.09   11.40
   5   7   1   92.09    8.60
  -6  -7  -1    4.00    2.40
  -6  -7  -1    2.40    5.00
   6   7   1    7.80    3.10
   7  -8  -1  163.08   16.50
   7  -8  -1  162.08   14.60
   6  -8  -1   29.40    7.00
   6  -8  -1   27.40    7.20
   5  -8  -1  193.78   14.90
   5  -8  -1  193.98   15.20
   5  -8  -1  204.08   16.10
   4  -8  -1  237.48   16.50
   4  -8  -1  239.78   16.60
   4  -8  -1  196.38   16.10
   4  -8  -1  252.17   16.40
   3  -8  -1  143.09   12.10
   3  -8  -1  127.59   11.40
   3  -8  -1  142.09   12.70
  -3   8   1  151.98   12.60
   2  -8  -1  244.48   16.50
   2  -8  -1  230.58   15.80
   2  -8  -1  241.88   17.00
  -2   8   1  242.28   16.60
   1  -8  -1   80.29    8.40
   1  -8  -1   88.59    8.70
   1  -8  -1  101.69   10.40
  -1   8   1   77.59    9.10
   0  -8  -1    9.80    4.80
   0  -8  -1   10.30    3.80
   0   8   1   14.20    5.10
   0   8   1    6.40    3.80
  -1  -8  -1  121.29   10.00
  -1  -8  -1   99.89   11.70
   1   8   1  136.19   12.50
   1   8   1  146.29   11.30
  -2  -8  -1  166.48   11.90
  -2  -8  -1  177.38   15.10
   2   8   1  170.38   15.50
   2   8   1  144.49   11.80
  -3  -8  -1  451.85   27.00
  -3  -8  -1  446.56   22.00
   3   8   1  413.46   27.10
   3   8   1  421.26   22.70
  -4  -8  -1    1.80    2.70
  -4  -8  -1    0.40    2.70
   4   8   1    0.10    2.60
  -5  -8  -1   14.80    4.30
  -5  -8  -1    1.70    3.60
   5   8   1    1.00    2.80
  -6  -8  -1   25.90    4.80
  -6  -8  -1   21.70    7.20
   6   8   1   22.70    5.90
   7  -9  -1   33.50    9.60
   6  -9  -1   68.29   10.90
   6  -9  -1   52.09   10.40
   5  -9  -1   85.39   11.90
   5  -9  -1   75.19    9.80
   5  -9  -1   70.49   11.50
   4  -9  -1    2.10    3.00
   4  -9  -1   14.70    5.00
   4  -9  -1    5.10    3.60
   3  -9  -1  678.93   33.30
   3  -9  -1  617.24   34.20
  -3   9   1  674.23   33.50
   2  -9  -1    5.20    3.80
   2  -9  -1    7.20    3.60
   2  -9  -1    4.50    4.20
  -2   9   1    3.90    4.30
   1  -9  -1   10.80    4.80
   1  -9  -1   15.20    5.00
   1  -9  -1   19.60    6.70
  -1   9   1   14.50    5.10
   0  -9  -1  192.48   19.90
   0  -9  -1  247.38   16.50
   0  -9  -1  249.08   16.20
   0   9   1  239.88   18.40
  -1  -9  -1  185.48   16.80
  -1  -9  -1  236.78   15.00
   1   9   1  193.98   16.60
   1   9   1  191.28   14.60
  -2  -9  -1  108.09    9.90
  -2  -9  -1  111.09   13.00
   2   9   1  106.39   12.90
   2   9   1  122.29   11.00
  -3  -9  -1   -2.60    2.10
  -3  -9  -1   -2.70    2.30
   3   9   1   -2.00    2.40
  -4  -9  -1   20.10    7.60
  -4  -9  -1   23.60    5.10
   4   9   1   29.00    6.60
  -5  -9  -1    4.90    5.10
  -5  -9  -1    1.50    3.70
   5   9   1    0.50    3.90
   6 -10  -1    7.60    7.10
   6 -10  -1   19.60    6.90
   5 -10  -1   15.80    5.70
   5 -10  -1   18.70    6.10
   4 -10  -1  173.68   15.00
   4 -10  -1  158.78   15.50
   3 -10  -1  238.58   19.20
   3 -10  -1  249.18   18.50
  -3  10   1  247.28   18.40
   2 -10  -1  213.88   17.50
   2 -10  -1  205.38   15.90
  -2  10   1  198.68   16.50
   1 -10  -1    3.50    3.20
   1 -10  -1   -2.20    4.70
  -1  10   1   -1.80    3.20
   0 -10  -1   39.30    9.30
   0 -10  -1   56.99    9.40
   0  10   1   40.00    8.90
  -1 -10  -1   57.19   11.50
  -1 -10  -1   76.49   10.50
  -2 -10  -1  107.39   13.50
  -2 -10  -1   94.59    9.90
  -3 -10  -1  156.48   12.70
  -3 -10  -1  181.18   17.10
  -4 -10  -1   21.10    6.20
  -4 -10  -1   16.60    7.10
   5 -11  -1    6.40    5.30
   5 -11  -1    2.00    5.20
   4 -11  -1   -7.80    3.00
   4 -11  -1   -2.30    4.90
   3 -11  -1    0.80    4.30
   3 -11  -1   -2.90    1.70
   2 -11  -1    4.90    4.40
   2 -11  -1    6.50    4.70
   1 -11  -1   11.00    6.40
   1 -11  -1   11.70    5.10
   0 -11  -1    2.50    3.80
   0 -11  -1    5.20    6.20
  -1 -11  -1   -7.60    3.60
  -1 -11  -1   -1.70    3.20
  -2 -11  -1    8.70    6.20
  -3 -11  -1   68.79   12.80
  -3 -11  -1   51.89    9.20
   4 -12  -1   51.19   11.50
   3 -12  -1   73.59   11.30
   3 -12  -1   81.89   14.40
   2 -12  -1   12.70    6.30
   2 -12  -1    3.50    5.70
   1 -12  -1   -7.30    5.40
   1 -12  -1    8.30    4.90
   0 -12  -1   93.99   15.40
   0 -12  -1  113.69   12.80
  -1 -12  -1   78.89   14.00
  -2 -12  -1   46.40   11.20
  -2 -12  -1   34.20    8.00
   0 -13   2   -6.40    3.80
   0 -13   2   -3.90    6.40
   1 -13   2   -7.30    5.70
   1 -13   2   -0.90    3.90
   2 -13   2    7.60    7.60
  -3 -12   2   33.90    7.80
  -2 -12   2    7.70    7.10
  -2 -12   2   20.40    6.40
  -1 -12   2    1.60    7.70
  -1 -12   2   10.90    5.60
   0 -12   2   36.60   10.00
   0 -12   2   54.49   10.00
   1 -12   2   18.50    8.40
   1 -12   2   12.90    6.50
   2 -12   2   11.30    5.70
   2 -12   2   14.00    7.30
   3 -12   2    2.10    4.30
   4 -12   2   27.50    9.20
   4 -12   2   40.90   10.80
  -4 -11   2   50.39    8.00
  -4 -11   2   53.09   12.00
  -3 -11   2   91.09   15.10
  -3 -11   2   94.39   10.20
  -2 -11   2   85.69    9.60
  -2 -11   2   74.39   13.90
  -1 -11   2    8.40    4.90
  -1 -11   2   18.90    5.60
   0 -11   2    6.20    6.50
   0 -11   2    9.90    4.40
   1 -11   2  107.69   12.00
   1 -11   2  127.09   15.10
   2 -11   2   33.60    7.60
   2 -11   2   25.60    8.30
   3 -11   2    9.90    5.10
   3 -11   2    0.10    4.30
   4 -11   2  181.58   17.10
   4 -11   2  198.08   18.90
   5 -11   2   -7.30    2.40
   5 -11   2   -1.10    3.80
  -5 -10   2   -8.80    4.70
  -5 -10   2   -1.60    4.20
  -4 -10   2   -2.00    2.80
  -4 -10   2   -2.60    3.40
  -3 -10   2    0.70    4.70
  -3 -10   2   -4.10    2.90
  -3 -10   2    1.30    3.10
  -2 -10   2   41.50    9.80
  -2 -10   2   52.29    8.10
  -2 -10   2   56.39    8.30
  -1 -10   2   17.30    5.10
  -1 -10   2    4.20    3.50
  -1 -10   2   21.90    7.30
   0  10  -2   -3.60    3.40
   0 -10   2    6.10    3.60
   0 -10   2   -1.10    2.50
   0 -10   2    6.50    4.90
  -1  10  -2   72.69    9.40
   1 -10   2   70.59   10.30
   1 -10   2   69.69   12.40
   2 -10   2  125.99   13.60
   2 -10   2  112.29   11.30
   3 -10   2    5.70    4.80
   3 -10   2   -1.70    3.80
   4 -10   2    3.20    5.00
   4 -10   2    9.70    4.80
   5 -10   2    5.00    3.50
   5 -10   2   -3.50    4.40
   6 -10   2    7.20    4.50
   6 -10   2   -0.30    5.30
  -6  -9   2   -5.90    4.10
  -6  -9   2   -5.40    2.70
  -5  -9   2  141.59   11.00
  -4  -9   2   15.90    6.30
  -4  -9   2   14.70    4.70
  -4  -9   2   15.60    4.60
  -3  -9   2   18.70    4.60
  -3  -9   2   24.00    7.40
  -3  -9   2   22.20    5.20
   2   9  -2  172.28   16.10
  -2  -9   2  189.68   13.10
  -2  -9   2  198.48   13.40
  -2  -9   2  161.38   16.30
   1   9  -2  240.28   18.50
  -1  -9   2  215.58   18.70
  -1  -9   2  241.78   15.50
  -1  -9   2  225.18   15.20
   0   9  -2   29.70    7.60
   0  -9   2   34.00    6.50
   0  -9   2   26.00    5.60
   0  -9   2   20.60    6.00
  -1   9  -2  103.29   13.00
   1  -9   2   89.59   11.60
   1  -9   2  101.19   10.10
   1  -9   2   82.49    9.00
  -2   9  -2    1.00    2.60
   2  -9   2    0.60    2.50
   2  -9   2    0.10    3.00
   2  -9   2    3.40    3.00
  -3   9  -2  116.59   12.10
   3  -9   2  149.69   14.30
   3  -9   2  133.89   12.30
   3  -9   2  125.99   13.40
   4  -9   2   14.10    5.40
   4  -9   2   11.00    5.70
   5  -9   2   64.69   10.90
   5  -9   2   53.39   10.90
   6  -9   2   14.80    7.00
   6  -9   2   13.30    6.10
   7  -9   2   72.19   11.80
   7  -9   2   48.60   11.60
  -6  -8   2   49.10    5.30
  -6  -8   2   42.00   10.20
  -6  -8   2   41.50    5.50
  -5  -8   2  161.08   16.40
  -5  -8   2  166.48   11.00
  -4  -8   2    5.90    4.50
  -4  -8   2   16.10    3.80
  -4  -8   2   15.50    4.00
   3   8  -2  533.45   31.20
  -3  -8   2  551.64   31.20
  -3  -8   2  524.95   25.10
  -3  -8   2  541.95   24.60
  -2  -8   2  349.37   18.50
  -2  -8   2  338.07   18.50
   1   8  -2  874.81   40.70
  -1  -8   2  889.81   36.80
  -1  -8   2  747.63   39.90
  -1  -8   2  861.01   36.40
   0   8  -2   43.30    8.20
   0  -8   2   43.50    6.90
   0  -8   2   39.50    8.30
   0  -8   2   43.40    6.80
  -1   8  -2   48.40    8.50
   1  -8   2   47.70    7.30
   1  -8   2   47.10    8.60
   1  -8   2   46.40    7.60
  -2   8  -2   39.00    7.60
   2  -8   2   47.00    7.60
   2  -8   2   38.30    7.20
   2  -8   2   42.10    8.30
  -3   8  -2   71.69    8.60
   3  -8   2   53.19    8.30
   3  -8   2   59.09    9.40
   3  -8   2   67.19    9.00
   4  -8   2   -1.80    2.10
   4  -8   2    7.20    3.60
   4  -8   2    1.90    2.50
   4  -8   2    2.60    2.80
   5  -8   2   81.29   10.70
   5  -8   2   51.59    9.30
   6  -8   2   43.30    9.80
   6  -8   2   22.40    6.90
   7  -8   2   39.50    8.30
   7  -8   2   34.40    8.70
  -7  -7   2   15.90    7.30
  -7  -7   2   12.30    2.40
  -7  -7   2    9.30    2.70
  -6  -7   2   91.09   11.80
  -6  -7   2   85.99    6.20
  -6  -7   2   75.39    6.30
  -5  -7   2   17.80    5.90
  -5  -7   2   18.20    3.40
  -5  -7   2   15.60    4.20
   4   7  -2  288.97   21.30
  -4  -7   2  280.87   15.20
  -4  -7   2  286.57   20.50
  -4  -7   2  296.27   14.50
   3   7  -2  145.59   13.80
  -3  -7   2  142.99    9.40
  -3  -7   2  184.38   15.20
  -3  -7   2  125.09    9.40
   2   7  -2   93.99   10.20
  -2  -7   2   93.09    7.60
  -2  -7   2  100.69    8.20
  -2  -7   2   79.09   10.00
   1   7  -2  114.69   10.90
  -1  -7   2  127.69    9.50
  -1  -7   2  120.89   11.90
  -1  -7   2  121.59    9.20
   0   7  -2    2.90    2.40
   0  -7   2    5.70    2.50
   0  -7   2    2.60    1.80
   0  -7   2    3.90    2.80
  -1   7  -2  307.97   18.80
   1  -7   2  316.47   17.70
   1  -7   2  322.47   19.70
   1  -7   2  310.47   17.40
  -2   7  -2   16.30    4.40
   2  -7   2   10.30    4.60
   2  -7   2   12.00    4.00
   2  -7   2   12.60    3.80
  -3   7  -2   55.69    7.30
   3  -7   2   51.49    7.80
   3  -7   2   45.70    7.80
   3  -7   2   39.50    7.10
   3  -7   2   39.20    7.70
   4  -7   2  164.18   15.70
   4  -7   2  219.58   16.50
   4  -7   2  219.48   15.40
   4  -7   2  206.28   16.40
   5  -7   2    9.10    4.00
   5  -7   2   18.30    5.80
   5  -7   2    9.50    3.20
   5  -7   2   11.80    4.60
   6  -7   2   43.80    8.30
   6  -7   2   28.90    8.30
   7  -7   2   21.30    7.60
  -7  -6   2    1.50    5.90
  -6  -6   2  140.19    8.00
  -6  -6   2  141.79    7.60
  -6  -6   2  151.98   15.20
   5   6  -2  317.97   23.90
  -5  -6   2  362.66   16.10
  -5  -6   2  365.36   23.40
   4   6  -2   44.00   10.40
  -4  -6   2   43.20    4.50
  -4  -6   2   45.80    4.50
   3   6  -2   69.39    9.10
  -3  -6   2   61.89    8.50
  -3  -6   2   61.79    5.60
  -3  -6   2   64.19    5.50
   2   6  -2    5.20    2.60
  -2  -6   2    3.30    1.80
  -2  -6   2    0.50    1.60
  -2  -6   2    1.50    2.90
   1   6  -2  110.09    9.90
  -1  -6   2  110.39   10.20
  -1  -6   2  100.89    7.90
  -1  -6   2  107.39    8.00
   0   6  -2   23.90    5.30
   0  -6   2   20.90    4.10
   0  -6   2   35.30    6.50
   0  -6   2   15.10    3.80
  -1   6  -2 2048.50   75.39
   1  -6   2 1905.61   73.19
   1  -6   2 1991.00   75.59
   1  -6   2 2003.80   73.19
  -2   6  -2  142.39   10.60
  -2   6  -2  155.78   11.50
   2  -6   2  146.79   10.30
   2  -6   2  128.49   10.90
   2  -6   2  129.49   10.10
  -3   6  -2   83.79    8.10
   3  -6   2   74.99    8.40
   3  -6   2   83.89    7.80
   3  -6   2   86.19    8.30
  -4   6  -2   15.70    4.80
   4  -6   2   23.70    6.00
   4  -6   2   19.60    4.30
   4  -6   2   16.00    4.70
  -5   6  -2  170.48   13.00
   5  -6   2  142.69   11.40
   5  -6   2  141.69   13.10
   5  -6   2  160.98   13.10
  -6   6  -2   93.39   10.10
   6  -6   2   87.29    8.80
   6  -6   2   84.59   10.70
  -7   6  -2   59.89    9.90
   7  -6   2   62.19   11.60
   8  -6   2    5.80    6.90
   8  -6   2    6.40    4.60
  -8  -5   2   63.49   11.60
  -7  -5   2   44.30   10.10
  -6  -5   2    6.30    1.70
  -6  -5   2   14.10    5.60
  -6  -5   2   10.40    2.20
  -5  -5   2  425.06   24.60
  -5  -5   2  402.96   16.40
   4   5  -2  187.98   16.20
  -4  -5   2  245.48   16.60
  -4  -5   2  233.18   10.60
   3   5  -2  338.87   20.80
  -3  -5   2  352.06   15.90
  -3  -5   2  366.56   15.50
  -3  -5   2  371.46   20.90
   2   5  -2   65.29    7.80
  -2  -5   2   66.59    7.90
  -2  -5   2   67.49    5.40
  -2  -5   2   68.79    5.50
   1   5  -2  411.26   23.40
  -1  -5   2  403.26   21.10
  -1  -5   2  400.66   18.00
  -1  -5   2  370.56   17.60
   0   5  -2  401.76   20.70
   0  -5   2  426.96   19.40
   0  -5   2  431.06   21.50
   0  -5   2  421.46   19.10
  -1   5  -2   96.69    8.30
  -1   5  -2   90.49    7.50
   1  -5   2   94.39    7.30
   1  -5   2   89.89    8.30
  -2   5  -2   76.29    7.00
  -2   5  -2   78.29    7.40
   2  -5   2   76.99    7.70
   2  -5   2   78.79    6.80
  -3   5  -2   82.79    7.80
   3  -5   2   86.69    7.50
   3  -5   2  106.09    9.40
   3  -5   2   92.19    8.40
  -4   5  -2   11.60    4.00
   4  -5   2    7.20    2.80
   4  -5   2   13.40    4.30
   4  -5   2    6.30    3.40
  -5   5  -2   14.00    4.20
   5  -5   2    3.30    2.80
   5  -5   2   11.80    4.30
   5  -5   2    5.50    3.00
  -6   5  -2  193.08   14.30
   6  -5   2  196.68   13.30
   6  -5   2  199.58   15.60
   6  -5   2  218.98   17.20
  -7   5  -2    0.40    3.60
   7  -5   2    0.60    3.00
   7  -5   2    1.20    4.40
  -8   5  -2   14.00    5.50
   8  -5   2   10.30    6.60
  -8  -4   2    0.90    5.30
  -7  -4   2    9.40    4.30
   6   4  -2   10.00    5.50
  -6  -4   2    2.70    0.90
  -6  -4   2    3.60    3.20
   5   4  -2   13.10    5.60
  -5  -4   2   16.70    2.00
  -5  -4   2   15.70    4.90
   4   4  -2    3.60    2.50
   4   4  -2   11.30    2.20
  -4  -4   2    8.90    3.60
  -4  -4   2   15.00    2.10
   3   4  -2  302.47   19.00
  -3  -4   2  363.26   14.10
  -3  -4   2  354.06   19.30
   2   4  -2  152.28   10.90
  -2  -4   2  138.99    7.70
  -2  -4   2  143.79    7.70
  -2  -4   2  134.49   10.70
   1   4  -2  851.51   35.10
  -1  -4   2  826.42   35.10
  -1  -4   2  841.32   32.10
  -1  -4   2  881.51   32.30
   0   4  -2 1555.04   55.49
   0   4  -2 1559.04   57.29
   0  -4   2 1487.05   55.09
  -1   4  -2    3.00    2.10
  -1   4  -2    1.10    1.30
   1  -4   2    1.30    1.40
   1  -4   2    2.00    1.70
  -2   4  -2   19.50    3.90
  -2   4  -2   20.80    4.40
   2  -4   2   23.30    4.50
   2  -4   2   21.00    3.90
   2  -4   2   20.80    4.10
  -3   4  -2  395.46   19.50
   3  -4   2  399.56   20.80
   3  -4   2  392.96   20.10
   3  -4   2  434.26   19.40
  -4   4  -2    3.40    2.30
   4  -4   2    2.20    1.50
   4  -4   2    1.40    2.10
   4  -4   2    0.70    1.60
  -5   4  -2  198.58   13.00
   5  -4   2  180.78   11.60
   5  -4   2  189.78   14.60
   5  -4   2  171.18   13.40
  -6   4  -2   24.40    5.30
  -6   4  -2   15.20    5.30
   6  -4   2   12.20    4.20
   6  -4   2   23.20    6.50
   6  -4   2   19.90    5.90
  -7   4  -2   -1.70    3.30
   7  -4   2   -7.30    3.20
  -8   4  -2    6.90    6.40
  -8   4  -2    6.50    4.40
   8  -4   2    2.70    3.30
   8  -4   2    7.70    6.10
  -8  -3   2    4.00    4.20
  -7  -3   2  464.45   27.60
   6   3  -2    3.10    4.00
  -6  -3   2    4.90    3.80
   5   3  -2   69.39    9.00
   5   3  -2   75.19    3.80
  -5  -3   2   69.19    3.60
  -5  -3   2   75.59    8.50
   4   3  -2   -1.90    1.10
   4   3  -2    0.70    0.80
  -4  -3   2   -0.10    0.50
  -4  -3   2    1.60    2.20
   3   3  -2   10.90    4.00
  -3  -3   2   15.70    4.10
  -3  -3   2   17.20    1.80
   2   3  -2  663.93   29.00
  -2  -3   2  672.43   24.80
  -2  -3   2  663.13   31.20
  -2  -3   2  711.33   24.80
   1   3  -2 1368.06   50.59
  -1  -3   2 1363.46   50.79
  -1  -3   2 1364.56   47.80
  -1  -3   2 1338.07   47.70
   0   3  -2  405.66   17.00
   0   3  -2  430.26   18.50
   0  -3   2  429.16   18.60
   0  -3   2  391.66   16.80
  -1   3  -2   80.69    5.70
  -1   3  -2   76.69    6.00
   1  -3   2   71.49    5.30
   1  -3   2   83.39    6.30
   2  -3   2   70.99    6.00
   2  -3   2   61.09    6.00
   2  -3   2   66.29    5.30
  -3   3  -2   41.70    4.90
   3  -3   2   45.70    4.60
   3  -3   2   45.70    5.50
  -4   3  -2   28.10    5.70
  -4   3  -2   29.60    5.10
   4  -3   2   22.70    4.00
   4  -3   2   32.80    5.90
  -5   3  -2  154.28   12.30
  -5   3  -2  141.89   10.40
   5  -3   2  141.79   11.60
   5  -3   2  161.38   10.10
  -6   3  -2  124.39   12.20
  -6   3  -2  121.59   10.20
   6  -3   2  135.89    9.50
   6  -3   2  132.59   12.20
  -7   3  -2   -0.80    2.60
  -7   3  -2   -1.10    2.20
   7  -3   2   -1.70    1.50
  -8   3  -2   20.30    5.10
   8  -3   2   18.40    4.70
  -8  -2   2    2.50    3.80
  -7  -2   2  194.78   15.90
   6   2  -2   78.69    9.90
  -6  -2   2   75.79   10.20
   5   2  -2  512.75   26.20
  -5  -2   2  505.65   25.40
  -5  -2   2  480.45   17.40
   4   2  -2  746.03   32.60
  -4  -2   2  705.53   31.40
   3   2  -2  423.26   20.60
  -3  -2   2  435.96   20.20
   2   2  -2  224.68   13.30
  -2  -2   2  294.97   10.30
  -2  -2   2  310.27   14.20
   1   2  -2  244.68    9.90
   1   2  -2  266.97   12.10
  -1  -2   2  246.38    9.80
  -1  -2   2  220.08   11.60
   0   2  -2 1545.15   54.09
   0   2  -2 1556.54   53.09
   0  -2   2 1515.55   52.89
   0  -2   2 1499.15   54.09
  -1   2  -2 6901.61  301.27
   1  -2   2 7101.59  305.17
  -2   2  -2 1326.17   47.50
  -2   2  -2 1294.97   48.50
   2  -2   2 1328.37   48.50
   2  -2   2 1297.27   47.10
  -3   2  -2    6.60    2.70
  -3   2  -2   11.00    2.80
   3  -2   2    7.70    2.20
   3  -2   2    8.60    2.80
  -4   2  -2  186.38   12.40
  -4   2  -2  176.88   10.50
   4  -2   2  171.68   11.80
   4  -2   2  157.58    9.50
  -5   2  -2  305.47   15.90
  -5   2  -2  290.77   18.10
   5  -2   2  291.27   14.70
   5  -2   2  288.97   17.90
  -6   2  -2  152.78   10.50
  -6   2  -2  124.39   12.10
   6  -2   2  130.69   12.10
   6  -2   2  143.79    9.40
  -7   2  -2    2.50    2.60
  -7   2  -2   -2.40    2.30
   7  -2   2   -0.60    1.40
  -8   2  -2   -2.10    2.90
  -8   2  -2    0.80    3.10
   8  -2   2    6.70    3.20
  -9  -1   2   65.29   13.10
  -8  -1   2   27.60    7.20
   7   1  -2    0.90    0.90
   7   1  -2    3.90    1.10
   7   1  -2    3.50    3.90
  -7  -1   2    5.60    3.40
   6   1  -2  137.69   12.40
   6   1  -2  136.69    6.00
  -6  -1   2  127.39   11.60
   5   1  -2  498.45   24.60
   5   1  -2  460.75   16.90
  -5  -1   2  465.45   23.70
  -4  -1   2  169.88   11.20
   3   1  -2  322.07   15.60
  -3  -1   2  306.17   15.10
   2   1  -2    5.10    1.70
  -2  -1   2    5.20    1.70
   1   1  -2 5278.17  256.17
  -1  -1   2 4991.10  250.27
   0   1  -2 1901.71   70.89
   0  -1   2 2308.37   71.19
  -1   1  -2  172.98    7.90
  -1   1  -2  173.48    8.40
   1  -1   2  170.68    7.80
   1  -1   2  162.48    8.30
  -2   1  -2 6295.57  304.77
   2  -1   2 7051.29  312.07
  -3   1  -2  624.94   24.50
  -3   1  -2  619.14   26.60
   3  -1   2  606.74   24.00
   3  -1   2  598.94   26.30
  -4   1  -2 1565.74   56.69
  -4   1  -2 1552.44   59.99
   4  -1   2 1592.44   56.09
   4  -1   2 1503.35   59.69
  -5   1  -2   59.19    7.60
  -5   1  -2   61.09    6.00
   5  -1   2   70.19    8.00
   5  -1   2   68.59    6.60
  -6   1  -2  522.15   27.90
  -6   1  -2  508.95   23.20
   6  -1   2  496.75   22.00
   6  -1   2  462.95   26.80
  -7   1  -2   22.10    6.80
  -7   1  -2   29.70    5.70
   7  -1   2   28.90    4.60
  -8   1  -2   34.40    6.20
   8  -1   2   25.70    5.10
  -9   0   2   54.59   10.80
   8   0  -2  110.49    5.90
   8   0  -2  115.89    6.30
  -8   0   2  115.99   12.40
   7   0  -2  207.68    9.40
   7   0  -2  212.38   16.50
   7   0  -2  219.38   10.10
  -7   0   2  196.98   15.80
   6   0  -2  605.34   30.70
   6   0  -2  645.94   23.50
   6   0  -2  647.74   24.20
  -6   0   2  626.04   30.70
   5   0  -2  434.66   22.20
   5   0  -2  435.16   16.50
   5   0  -2  427.86   17.00
  -5   0   2  440.06   22.10
   4   0  -2  537.85   20.20
   4   0  -2  542.15   24.40
   4   0  -2  550.14   19.80
  -4   0   2  557.44   24.40
   3   0  -2  490.25   17.30
   3   0  -2  481.25   17.40
   3   0  -2  499.95   20.70
  -3   0   2  458.25   20.30
   2   0  -2  449.46   16.00
   2   0  -2  454.85   17.90
  -2   0   2  460.05   17.80
   1   0  -2  132.09    5.30
   1   0  -2  124.39    5.50
  -1   0   2  129.89    5.30
  -1   0   2  136.09    5.40
   0   0   2 2138.79   66.29
   0   0   2 1782.72   66.09
  -1   0  -2 3229.08  110.69
  -1   0  -2 3325.17  111.49
   1   0   2 3310.67  110.69
   1   0   2 3291.97  111.49
  -2   0  -2 1884.71   66.89
  -2   0  -2 1917.01   64.99
   2   0   2 1837.12   64.79
   2   0   2 1870.21   66.79
  -3   0  -2  699.33   29.00
  -3   0  -2  675.33   26.20
   3   0   2  687.93   26.00
   3   0   2  657.83   28.70
  -4   0  -2   46.30    5.80
  -4   0  -2   59.19    5.00
   4   0   2   50.39    6.00
   4   0   2   45.70    4.20
  -5   0  -2  361.36   20.90
  -5   0  -2  378.06   17.30
   5   0   2  366.06   21.00
   5   0   2  355.86   16.50
  -6   0  -2   19.30    5.70
  -6   0  -2   18.40    3.90
   6   0   2   18.40    5.40
   6   0   2   16.50    3.40
  -7   0  -2    1.20    3.80
  -7   0  -2    6.90    3.00
   7   0   2    5.00    2.30
  -8   0  -2   27.70    8.40
  -8   0  -2   25.40    5.30
   8   0   2   29.20    4.90
   9  -1  -2   27.10    5.00
   9  -1  -2   22.60    3.50
  -9   1   2   29.20    8.80
   8  -1  -2    3.20    1.50
  -8   1   2    1.20    4.40
   7  -1  -2   76.39    9.50
   7  -1  -2   69.09    5.20
  -7   1   2   82.09    9.60
   6  -1  -2    0.30    1.30
   6  -1  -2    1.50    2.70
   6  -1  -2    2.40    1.30
   5  -1  -2  311.37   13.40
   5  -1  -2  295.67   17.10
   5  -1  -2  316.37   14.00
  -5   1   2  337.77   17.80
   4  -1  -2  466.95   18.20
   4  -1  -2  455.35   18.40
   4  -1  -2  456.75   21.10
  -4   1   2  470.75   21.20
   3  -1  -2   44.90    3.50
   3  -1  -2   41.30    4.10
   3  -1  -2   51.19    3.60
  -3   1   2   42.90    4.20
   2  -1  -2  384.36   15.30
   2  -1  -2  372.66   14.90
  -2   1   2  388.76   15.10
  -2   1   2  404.06   15.40
   1  -1  -2 7967.30  337.97
  -1   1   2 8026.00  316.67
   0  -1  -2  101.69    4.70
   0  -1  -2   90.79    4.90
   0   1   2   96.69    4.80
   0   1   2  105.69    5.20
  -1  -1  -2   55.99    3.80
  -1  -1  -2   60.09    4.30
   1   1   2   64.59    4.50
   1   1   2   65.79    4.10
  -2  -1  -2   57.89    4.20
  -2  -1  -2   65.89    5.40
   2   1   2   62.19    5.30
   2   1   2   61.79    4.20
  -3  -1  -2  122.39    7.10
  -3  -1  -2  136.59    9.50
   3   1   2  136.89    9.60
   3   1   2  121.89    7.10
  -4  -1  -2   51.59    4.60
  -4  -1  -2   60.09    6.60
   4   1   2   52.59    6.40
   4   1   2   57.89    4.70
  -5  -1  -2  762.62   35.70
  -5  -1  -2  773.82   30.60
   5   1   2  761.22   36.00
   5   1   2  764.82   30.10
  -6  -1  -2  656.33   27.40
  -6  -1  -2  650.63   33.40
   6   1   2  660.23   26.80
   6   1   2  614.64   33.20
  -7  -1  -2  109.79    8.90
  -7  -1  -2  142.09   14.20
  -8  -1  -2    1.70    2.60
  -8  -1  -2   -4.40    3.00
   9  -2  -2    3.60    2.60
  -9   2   2    0.90    6.00
   8  -2  -2   46.60    7.80
   8  -2  -2   34.40    5.20
  -8   2   2   50.39    9.30
   7  -2  -2  227.68   12.40
   7  -2  -2  216.98   11.60
   7  -2  -2  217.98   16.00
  -7   2   2  209.38   16.00
   6  -2  -2   50.99    5.30
   6  -2  -2   69.99    7.60
   6  -2  -2   55.59    5.10
  -6   2   2   54.99    8.60
   5  -2  -2  119.49    9.50
   5  -2  -2  127.89    7.70
  -5   2   2  136.49   10.30
   4  -2  -2  418.66   19.70
   4  -2  -2  431.86   18.10
   4  -2  -2  415.26   18.20
  -4   2   2  436.96   20.00
   3  -2  -2 1117.89   42.00
   3  -2  -2 1154.48   42.20
   3  -2  -2 1186.68   42.80
  -3   2   2 1171.38   42.90
   2  -2  -2  194.28    9.20
   2  -2  -2  212.48    9.60
   2  -2  -2  202.88    9.70
  -2   2   2  196.18    9.70
   1  -2  -2 1010.40   37.10
   1  -2  -2 1041.60   36.40
  -1   2   2 1069.89   36.30
  -1   2   2  996.90   37.20
   0  -2  -2  584.84   22.30
   0  -2  -2  541.95   22.20
   0   2   2  598.54   22.60
   0   2   2  628.34   22.60
  -1  -2  -2 1171.98   42.70
  -1  -2  -2 1245.88   44.10
   1   2   2 1222.78   42.90
   1   2   2 1164.78   44.20
  -2  -2  -2   16.40    2.60
  -2  -2  -2   11.90    3.10
   2   2   2   11.90    2.40
   2   2   2   10.90    2.90
  -3  -2  -2   85.89    7.70
  -3  -2  -2   85.79    5.70
   3   2   2   86.19    5.80
   3   2   2   85.79    7.90
  -4  -2  -2  288.07   17.10
  -4  -2  -2  288.97   13.50
   4   2   2  267.77   16.90
   4   2   2  280.27   13.30
  -5  -2  -2  273.47   17.80
  -5  -2  -2  284.47   13.60
   5   2   2  231.18   17.20
   5   2   2  262.47   13.40
  -6  -2  -2   19.00    6.30
  -6  -2  -2   20.20    4.10
   6   2   2   18.70    3.50
   6   2   2   17.40    7.30
  -7  -2  -2  167.38   15.60
  -7  -2  -2  164.28   10.80
   7   2   2  172.38   10.50
  -8  -2  -2   19.40    6.90
  -8  -2  -2   15.10    4.60
   9  -3  -2    2.20    2.80
   9  -3  -2    5.90    2.90
   8  -3  -2    1.30    2.40
   8  -3  -2   -4.90    2.00
  -8   3   2    3.30    4.30
   7  -3  -2    3.60    2.10
   7  -3  -2    1.10    2.00
   7  -3  -2    2.70    2.80
  -7   3   2    1.40    3.00
   6  -3  -2   -3.00    1.90
   6  -3  -2    2.70    1.80
   6  -3  -2    2.20    2.40
  -6   3   2    2.10    2.70
   5  -3  -2    4.00    2.00
   5  -3  -2    5.30    2.40
   5  -3  -2    7.00    2.60
  -5   3   2    6.40    2.80
   4  -3  -2  931.21   36.80
   4  -3  -2  919.01   35.90
   4  -3  -2  925.31   35.80
  -4   3   2  899.41   36.70
   3  -3  -2  794.42   31.50
   3  -3  -2  823.72   31.90
   3  -3  -2  784.92   31.20
   2  -3  -2    2.10    1.40
   2  -3  -2    1.50    1.40
   2  -3  -2    4.70    1.60
  -2   3   2    1.90    1.50
   1  -3  -2    8.10    2.10
   1  -3  -2   12.00    2.40
  -1   3   2   11.70    2.30
  -1   3   2   13.40    2.80
   0  -3  -2  732.33   27.90
   0  -3  -2  604.94   27.90
   0   3   2  793.62   28.80
   0   3   2  783.12   28.40
  -1  -3  -2 2361.76   83.19
  -1  -3  -2 2539.35   85.29
   1   3   2 2308.87   83.39
  -2  -3  -2 1686.53   60.49
   2   3   2 1532.05   60.69
   2   3   2 1613.74   57.59
  -3  -3  -2  229.28   11.30
  -3  -3  -2  238.88   14.40
   3   3   2  223.18   14.50
   3   3   2  216.28   11.40
  -4  -3  -2   50.89    6.80
  -4  -3  -2   44.80    4.60
   4   3   2   51.99    7.00
   4   3   2   52.59    4.90
  -5  -3  -2   11.80    4.20
  -5  -3  -2   19.70    3.60
   5   3   2   20.20    3.70
   5   3   2   22.40    6.00
  -6  -3  -2    7.30    3.70
  -6  -3  -2    6.50    2.60
   6   3   2    6.50    2.40
  -7  -3  -2   -0.50    2.50
  -7  -3  -2    2.90    4.40
   7   3   2   -3.10    2.00
  -8  -3  -2   41.70   10.10
  -8  -3  -2   26.40    5.10
   8   3   2   14.40    3.70
   8  -4  -2    0.80    4.00
   8  -4  -2    3.60    3.20
   8  -4  -2    3.70    2.50
  -8   4   2    1.50    4.20
   7  -4  -2   35.30    5.50
   7  -4  -2   34.20    6.60
   7  -4  -2   41.70    8.40
   7  -4  -2   44.60    6.90
  -7   4   2   39.90    8.00
   6  -4  -2  156.28   11.20
   6  -4  -2  141.49   11.80
   6  -4  -2  158.28   13.10
   6  -4  -2  170.58   10.90
   5  -4  -2   38.60    6.30
   5  -4  -2   39.80    6.80
   5  -4  -2   45.20    5.30
   5  -4  -2   43.50    6.10
   4  -4  -2  789.42   32.10
   4  -4  -2  780.62   34.40
   4  -4  -2  757.42   32.70
   4  -4  -2  756.12   31.90
   3  -4  -2  436.86   19.90
   3  -4  -2  415.26   19.70
   3  -4  -2  419.06   19.30
   3  -4  -2  438.66   22.10
   2  -4  -2   95.49    7.20
   2  -4  -2   95.79    7.30
  -2   4   2   96.59    7.40
  -2   4   2   94.89    6.90
   1  -4  -2    1.50    1.70
   1  -4  -2    2.80    2.00
  -1   4   2    3.80    1.90
  -1   4   2    4.40    2.00
   0  -4  -2    8.60    2.70
   0  -4  -2    5.40    2.60
   0   4   2   12.00    3.00
   0   4   2   12.20    2.80
  -1  -4  -2    4.10    2.10
  -1  -4  -2   10.50    3.30
   1   4   2    5.30    2.10
   1   4   2   19.40    4.50
  -2  -4  -2 1486.55   54.89
  -2  -4  -2 1392.56   51.29
   2   4   2 1339.27   51.59
  -3  -4  -2   36.80    4.10
  -3  -4  -2   32.40    6.00
   3   4   2   32.30    6.70
   3   4   2   28.70    4.40
  -4  -4  -2   45.30    4.80
  -4  -4  -2   48.30    8.10
   4   4   2   35.20    8.00
   4   4   2   45.00    4.70
  -5  -4  -2  314.87   15.60
  -5  -4  -2  340.17   21.30
   5   4   2  335.17   16.30
   5   4   2  277.67   21.20
  -6  -4  -2   28.10    4.70
  -6  -4  -2   33.70    7.60
   6   4   2   32.40    5.00
  -7  -4  -2   -1.00    2.30
   7   4   2   -3.10    2.40
   8  -5  -2    8.90    5.10
   8  -5  -2    9.60    5.40
   8  -5  -2    6.80    4.10
   7  -5  -2  122.09   12.50
   7  -5  -2  118.19   11.40
   7  -5  -2  125.09   10.00
   7  -5  -2  118.29   10.40
   6  -5  -2    6.80    4.10
   6  -5  -2    6.10    3.20
   6  -5  -2    5.80    3.10
   6  -5  -2    5.50    2.60
   5  -5  -2    9.60    3.50
   5  -5  -2    5.80    2.80
   5  -5  -2    7.30    3.50
   5  -5  -2   10.40    3.20
   4  -5  -2  615.14   27.70
   4  -5  -2  634.54   28.70
   4  -5  -2  622.24   28.10
   4  -5  -2  619.54   27.90
   3  -5  -2  258.97   14.90
   3  -5  -2  277.97   15.20
   3  -5  -2  265.47   14.40
   3  -5  -2  276.97   15.30
   2  -5  -2    0.10    1.80
   2  -5  -2   -0.50    1.70
  -2   5   2    1.30    1.40
  -2   5   2    2.50    1.80
   1  -5  -2 1737.73   63.69
   1  -5  -2 1792.82   64.89
  -1   5   2 1672.93   63.89
  -1   5   2 1709.33   63.79
   0  -5  -2  923.41   34.90
   0  -5  -2  757.22   35.30
   0   5   2  881.01   35.90
   0   5   2  895.11   35.20
  -1  -5  -2  296.07   14.80
  -1  -5  -2  302.87   17.00
   1   5   2  274.97   15.00
  -2  -5  -2    2.40    2.20
  -2  -5  -2    1.30    1.60
   2   5   2    1.30    1.60
   2   5   2    3.10    2.90
  -3  -5  -2   -2.30    1.00
  -3  -5  -2    1.00    1.60
   3   5   2   -1.30    1.20
   3   5   2    0.90    2.90
  -4  -5  -2   65.09    5.80
   4   5   2   49.40   11.60
   4   5   2   53.29    6.00
  -5  -5  -2  188.98   11.20
  -5  -5  -2  174.68   15.20
   5   5   2  168.78   11.30
  -6  -5  -2   13.20    5.20
  -6  -5  -2   10.10    2.90
   6   5   2    0.00    2.60
  -7  -5  -2   13.80    5.70
  -7  -5  -2   13.00    3.80
   7   5   2   12.60    3.50
   8  -6  -2    9.70    5.00
   8  -6  -2   10.10    6.30
   8  -6  -2   14.70    4.60
   7  -6  -2  175.58   13.50
   7  -6  -2  191.78   16.90
   7  -6  -2  178.48   15.70
   7  -6  -2  164.88   12.90
   6  -6  -2   50.49    8.20
   6  -6  -2   54.09    7.90
   6  -6  -2   49.80    7.90
   6  -6  -2   50.99    9.10
   5  -6  -2  115.39    9.90
   5  -6  -2  118.49    9.90
   5  -6  -2  100.79   10.10
   5  -6  -2  117.99   10.30
   4  -6  -2  783.12   34.40
   4  -6  -2  797.42   35.10
   4  -6  -2  825.72   35.40
   4  -6  -2  784.42   35.40
   3  -6  -2  478.05   23.60
   3  -6  -2  489.25   23.80
   3  -6  -2  483.45   23.90
  -3   6   2  477.95   23.30
   2  -6  -2  746.73   32.90
   2  -6  -2  747.83   33.10
   2  -6  -2  767.02   33.30
  -2   6   2  812.72   33.70
  -2   6   2  749.03   33.20
   1  -6  -2  417.86   20.90
   1  -6  -2  363.06   19.30
  -1   6   2  406.36   20.30
  -1   6   2  383.26   19.90
   0  -6  -2   21.10    4.30
   0  -6  -2   15.10    4.40
   0   6   2   17.70    4.00
   0   6   2   10.50    3.40
  -1  -6  -2  941.21   38.00
  -1  -6  -2  904.31   40.60
   1   6   2 1014.30   41.70
   1   6   2  919.01   38.70
  -2  -6  -2   51.39    8.30
  -2  -6  -2   39.20    5.90
   2   6   2   45.00    6.50
   2   6   2   34.90    7.30
  -3  -6  -2   78.69    7.00
  -3  -6  -2   61.99    8.30
   3   6   2   89.99   11.30
   3   6   2   63.39    6.60
  -4  -6  -2  152.58   13.30
  -4  -6  -2  146.49    9.90
   4   6   2  110.09   12.90
   4   6   2  154.28   10.80
  -5  -6  -2   39.70    5.70
  -5  -6  -2   39.70    8.50
   5   6   2   26.00    5.30
  -6  -6  -2    2.60    4.90
  -6  -6  -2    1.00    2.40
   6   6   2    0.60    2.70
  -7  -6  -2   22.80    4.80
  -7  -6  -2   24.40    9.10
   7   6   2   27.00    4.90
   8  -7  -2    3.60    4.80
   7  -7  -2   20.60    6.30
   7  -7  -2   35.40    7.50
   6  -7  -2  131.59   11.60
   6  -7  -2  110.39   11.00
   6  -7  -2  122.09   11.20
   6  -7  -2  108.19   11.60
   5  -7  -2   34.30    7.50
   5  -7  -2   55.19    8.60
   5  -7  -2   53.09    8.10
   5  -7  -2   51.79    8.10
   4  -7  -2   31.00    5.90
   4  -7  -2   33.30    6.70
   4  -7  -2   26.70    5.60
   4  -7  -2   26.20    6.20
   3  -7  -2    3.30    2.50
   3  -7  -2    0.00    1.70
   3  -7  -2    0.70    2.40
  -3   7   2    3.70    2.60
   2  -7  -2  500.95   25.90
   2  -7  -2  547.25   26.20
   2  -7  -2  535.35   26.70
  -2   7   2  554.74   26.30
   1  -7  -2   88.99    8.30
   1  -7  -2   84.79    8.80
  -1   7   2   85.89    8.40
  -1   7   2   72.79    7.70
   0  -7  -2  309.67   19.80
   0  -7  -2  360.96   18.70
   0   7   2  352.96   20.10
   0   7   2  352.96   19.20
  -1  -7  -2  667.93   33.20
  -1  -7  -2  701.63   30.50
   1   7   2  680.63   31.20
   1   7   2  697.23   33.60
  -2  -7  -2  185.48   14.50
  -2  -7  -2  171.88   11.80
   2   7   2  176.58   12.50
   2   7   2  186.88   15.10
  -3  -7  -2   96.49    8.40
  -3  -7  -2  110.99   11.30
   3   7   2   90.69    8.70
   3   7   2   83.59   10.90
  -4  -7  -2  304.87   21.00
  -4  -7  -2  286.37   16.10
   4   7   2  292.97   17.20
  -5  -7  -2   37.90    5.90
  -5  -7  -2   41.70    9.00
   5   7   2   34.10    6.20
  -6  -7  -2    4.80    4.40
  -6  -7  -2    3.90    2.80
   6   7   2   -1.10    3.10
   7  -8  -2   23.20    7.10
   7  -8  -2   13.10    5.70
   6  -8  -2   33.00    8.00
   6  -8  -2   34.10    7.50
   6  -8  -2   25.40    6.60
   5  -8  -2   69.49   10.30
   5  -8  -2   84.89   17.20
   4  -8  -2  263.67   17.40
   4  -8  -2  245.28   17.40
   4  -8  -2  263.77   17.60
   4  -8  -2  237.38   16.00
   3  -8  -2  229.98   16.20
   3  -8  -2  219.58   15.70
   3  -8  -2  219.38   15.70
  -3   8   2  215.78   15.10
   2  -8  -2   46.60    9.00
   2  -8  -2   48.90    8.30
  -2   8   2   49.70    8.10
   1  -8  -2   56.09    8.40
   1  -8  -2   54.19    9.00
  -1   8   2   67.49    8.10
  -1   8   2   49.20    7.90
   0  -8  -2    1.00    3.10
   0  -8  -2    5.00    2.80
   0   8   2    0.60    2.30
   0   8   2    5.30    3.40
  -1  -8  -2   -2.00    1.80
  -1  -8  -2   -0.20    3.40
   1   8   2   -1.00    3.40
   1   8   2   -2.00    2.10
  -2  -8  -2  124.39   12.40
  -2  -8  -2  102.09    9.20
   2   8   2  114.69   10.40
   2   8   2  124.49   13.20
  -3  -8  -2   73.09    8.70
  -3  -8  -2   85.29   10.70
   3   8   2   94.09   10.60
  -4  -8  -2   -3.80    3.60
  -4  -8  -2   -2.80    2.00
   4   8   2   -3.50    2.30
  -5  -8  -2   14.40    4.00
  -5  -8  -2   13.60    7.10
   5   8   2    8.00    4.40
  -6  -8  -2   31.50    6.00
   6   8   2   36.60    6.60
   7  -9  -2   75.09   13.20
   6  -9  -2   -0.60    3.90
   6  -9  -2   -4.40    3.50
   5  -9  -2   21.90    5.70
   5  -9  -2   19.40    5.60
   5  -9  -2   12.30    5.80
   4  -9  -2    6.00    4.20
   4  -9  -2    8.10    5.60
   3  -9  -2  288.47   19.70
   3  -9  -2  290.17   19.20
  -3   9   2  278.57   18.70
   2  -9  -2   71.09   10.00
   2  -9  -2   65.79    9.70
   2  -9  -2   73.39    9.70
  -2   9   2   55.09    9.00
   1  -9  -2  298.77   20.70
   1  -9  -2  279.97   18.80
   1  -9  -2  300.07   18.90
  -1   9   2  313.57   20.20
   0  -9  -2  365.16   20.80
   0  -9  -2  302.57   22.50
   0   9   2  362.06   21.50
   0   9   2  372.16   23.10
  -1  -9  -2   94.39    9.50
  -1  -9  -2  112.09   12.60
   1   9   2  100.49   11.80
   1   9   2   74.69    8.90
  -2  -9  -2  418.96   22.60
  -2  -9  -2  442.76   26.90
   2   9   2  397.26   23.50
  -3  -9  -2   53.09    8.10
  -3  -9  -2   57.89   11.10
   3   9   2   49.50    8.20
  -4  -9  -2   29.20    6.10
  -4  -9  -2   43.40   10.40
   4   9   2   22.20    5.90
  -5  -9  -2   -1.00    3.20
  -5  -9  -2    7.90    3.80
   6 -10  -2   70.39   12.00
   6 -10  -2   89.89   13.50
   5 -10  -2   30.50    7.90
   5 -10  -2   31.20    8.20
   4 -10  -2   64.29   10.20
   4 -10  -2   80.49   11.90
   4 -10  -2   64.49   10.90
   3 -10  -2   -1.00    3.90
   3 -10  -2   13.40    4.70
  -3  10   2    4.00    3.80
   2 -10  -2   96.29   11.90
   2 -10  -2  111.39   11.30
  -2  10   2   90.69   10.70
   1 -10  -2   24.40    6.70
   1 -10  -2   11.20    6.00
  -1  10   2   17.10    5.00
   0 -10  -2   91.59   11.90
   0 -10  -2  125.99   11.60
   0  10   2  105.49   11.80
  -1 -10  -2   51.19    8.50
  -1 -10  -2   32.10    8.60
  -2 -10  -2    8.90    4.20
  -2 -10  -2   -1.00    4.30
  -3 -10  -2   63.49    9.40
  -3 -10  -2   58.49   11.30
  -4 -10  -2    4.70    4.60
  -4 -10  -2    3.80    5.00
   5 -11  -2    4.50    5.30
   5 -11  -2   -0.70    5.10
   4 -11  -2   10.90    6.60
   4 -11  -2   11.90    5.90
   3 -11  -2    1.80    4.40
   3 -11  -2    6.10    5.10
   2 -11  -2   21.20    6.90
   2 -11  -2   23.50    7.60
   1 -11  -2   13.50    6.70
   1 -11  -2   19.80    6.50
   0 -11  -2    3.70    5.00
   0 -11  -2   14.10    5.00
  -1 -11  -2   99.99   11.30
  -1 -11  -2   92.29   15.10
  -2 -11  -2   64.29   12.80
  -2 -11  -2   69.49   10.10
  -3 -11  -2   10.80    5.70
  -3 -11  -2    1.30    5.40
   3 -12  -2  153.58   17.20
   3 -12  -2  161.98   15.70
   2 -12  -2   47.60   11.80
   2 -12  -2   40.50    8.60
   1 -12  -2    4.20    4.40
   1 -12  -2   -2.30    4.80
   0 -12  -2   35.20    9.30
   0 -12  -2   30.70    7.80
  -1 -12  -2    9.40    8.60
  -1 -12  -2   24.10    7.30
   0 -13   3   55.89   10.20
   0 -13   3   41.80   12.80
   1 -13   3   27.30   10.40
   1 -13   3    1.90    4.80
   2 -13   3   62.29   13.50
  -3 -12   3   13.30    5.50
  -2 -12   3   40.90    7.80
  -2 -12   3   20.00    8.40
  -1 -12   3   10.90    5.90
  -1 -12   3   19.20    5.90
   0 -12   3    3.80    5.00
   0 -12   3   -1.50    6.40
   1 -12   3   11.40    7.50
   1 -12   3    7.00    5.00
   2 -12   3   81.69   12.70
   2 -12   3   80.49   17.50
   3 -12   3  233.98   19.50
   3 -12   3  222.68   21.60
   4 -12   3    7.50    7.30
  -4 -11   3    4.20    5.10
  -4 -11   3   -0.40    3.50
  -4 -11   3   -8.90    4.80
  -3 -11   3  129.59   17.20
  -3 -11   3  112.99   10.80
  -2 -11   3   -4.80    2.50
  -2 -11   3    0.00    5.10
  -1 -11   3  133.49   16.90
  -1 -11   3  174.28   13.90
   0 -11   3    7.60    4.40
   0 -11   3    6.90    4.60
   1 -11   3   13.40    7.00
   1 -11   3   18.70    6.00
   2 -11   3  189.48   16.20
   2 -11   3  170.48   17.40
   3 -11   3    2.90    4.20
   3 -11   3    4.40    5.40
   4 -11   3   72.09   13.50
   4 -11   3   81.39   12.90
   5 -11   3   -0.40    3.60
   5 -11   3    6.40    4.20
  -5 -10   3   10.00    3.60
  -5 -10   3    2.40    3.40
  -5 -10   3    3.10    6.00
  -4 -10   3    2.00    3.90
  -4 -10   3    9.10    3.20
  -4 -10   3    4.50    4.90
  -3 -10   3  129.99   12.70
  -3 -10   3  125.29   15.50
  -2 -10   3   15.10    7.00
  -2 -10   3   13.80    4.90
  -2 -10   3   10.70    4.40
  -1 -10   3    6.30    3.30
  -1 -10   3   17.20    5.20
  -1 -10   3    9.30    6.70
   0 -10   3  102.29   10.70
   0 -10   3  108.79   10.70
   0 -10   3  114.59   13.30
   1 -10   3   10.40    4.80
   1 -10   3   13.90    5.10
   2 -10   3   -6.80    2.50
   2 -10   3    4.00    4.40
   3 -10   3  303.87   23.30
   3 -10   3  357.26   22.80
   4 -10   3    2.00    4.90
   4 -10   3    1.40    3.00
   5 -10   3   32.20    8.40
   6 -10   3   50.39   11.50
   6 -10   3   44.60    9.50
  -6  -9   3   32.20    9.20
  -6  -9   3   19.90    4.30
  -6  -9   3   13.60    4.60
  -5  -9   3   19.50    4.10
  -5  -9   3   19.90    4.70
  -4  -9   3    5.80    3.20
  -4  -9   3    5.20    3.50
  -4  -9   3    8.50    5.20
  -3  -9   3    5.60    2.70
  -3  -9   3    0.70    2.60
  -3  -9   3    1.00    3.20
   2   9  -3  734.63   37.80
  -2  -9   3  726.73   32.10
  -2  -9   3  585.94   36.10
  -2  -9   3  706.43   31.50
   1   9  -3  157.08   14.60
  -1  -9   3  167.88   12.60
  -1  -9   3  162.48   12.30
  -1  -9   3  141.49   14.70
   0   9  -3    9.40    4.50
   0  -9   3   18.80    5.00
   0  -9   3   16.10    6.10
   0  -9   3    9.90    4.20
  -1   9  -3  141.29   13.20
   1  -9   3  144.29   12.20
   1  -9   3  158.68   12.50
   1  -9   3  131.09   13.50
  -2   9  -3  225.78   17.50
   2  -9   3  237.28   16.10
   2  -9   3  229.88   16.60
   2  -9   3  243.18   18.70
  -3   9  -3   71.99    9.30
   3  -9   3   84.39   11.40
   3  -9   3   57.29   10.80
   4  -9   3   57.89   10.20
   4  -9   3   75.89   12.70
   5  -9   3    1.90    3.00
   5  -9   3   -4.20    3.90
   6  -9   3    6.80    4.50
  -6  -8   3    9.90    2.90
  -6  -8   3   10.50    2.60
  -6  -8   3    2.20    4.90
  -5  -8   3    0.80    2.10
  -5  -8   3    0.10    2.20
  -5  -8   3    0.90    2.30
  -4  -8   3   96.89    7.70
  -4  -8   3   99.89    7.90
  -4  -8   3   92.09   11.50
   3   8  -3    1.50    2.80
  -3  -8   3    0.60    3.30
  -3  -8   3    2.80    2.00
  -3  -8   3    1.00    2.50
  -2  -8   3  238.98   22.40
  -2  -8   3  287.27   15.90
  -2  -8   3  275.97   15.70
   1   8  -3   85.59    9.90
  -1  -8   3   82.69    7.90
  -1  -8   3   77.79    7.90
  -1  -8   3   72.19   11.50
   0   8  -3    6.20    3.90
   0  -8   3    2.10    2.40
   0  -8   3    9.70    4.80
   0  -8   3    6.60    3.10
  -1   8  -3   78.79    9.00
   1  -8   3   79.69    8.00
   1  -8   3   70.69    8.30
   1  -8   3   79.49   10.00
  -2   8  -3  162.08   13.70
   2  -8   3  134.99   11.70
   2  -8   3  145.39   11.70
   2  -8   3  159.58   14.10
  -3   8  -3    3.20    2.80
   3  -8   3    2.20    2.80
   3  -8   3    6.60    3.40
   3  -8   3    3.90    3.40
   4  -8   3  100.69   11.50
   4  -8   3   88.39    9.40
   4  -8   3   90.39   10.30
   4  -8   3   90.79   12.30
   5  -8   3   -3.70    3.00
   5  -8   3    7.30    4.60
   6  -8   3   27.20    7.60
   6  -8   3   21.00    7.00
   7  -8   3   39.30    8.90
   7  -8   3   39.80   10.50
  -7  -7   3   16.80    7.50
  -6  -7   3   88.79    5.50
  -6  -7   3   81.39    5.80
  -6  -7   3   76.89   12.90
  -5  -7   3  118.89    7.50
  -5  -7   3  121.49    8.10
  -5  -7   3  128.79   13.60
   4   7  -3  638.74   34.90
  -4  -7   3  646.64   34.10
  -4  -7   3  636.04   26.00
  -4  -7   3  615.14   26.50
   3   7  -3   23.20    6.50
  -3  -7   3   41.30    8.70
  -3  -7   3   31.10    4.90
  -3  -7   3   27.90    4.60
   2   7  -3  118.09   11.70
  -2  -7   3  124.89    9.00
  -2  -7   3  103.29   11.60
  -2  -7   3  119.99    8.80
   1   7  -3    5.70    2.40
  -1  -7   3   -0.10    2.60
  -1  -7   3    2.70    2.40
  -1  -7   3    3.50    2.00
   0   7  -3  275.97   17.90
   0  -7   3  292.17   19.00
   0  -7   3  279.97   16.30
   0  -7   3  317.37   16.60
  -1   7  -3   -0.70    1.60
   1  -7   3   -0.30    1.20
   1  -7   3    1.30    3.00
   1  -7   3   -0.10    1.60
  -2   7  -3  773.82   35.50
  -2   7  -3  819.92   37.30
   2  -7   3  836.82   35.50
   2  -7   3  770.02   37.40
   2  -7   3  810.22   35.80
  -3   7  -3    3.90    2.80
   3  -7   3    1.80    2.30
   3  -7   3    8.30    4.00
   3  -7   3    6.40    2.80
  -4   7  -3  903.71   40.30
   4  -7   3  873.31   38.70
   4  -7   3  892.81   40.80
   4  -7   3  839.62   41.50
  -5   7  -3   10.60    4.10
   5  -7   3    8.70    5.10
   5  -7   3    7.90    3.60
   5  -7   3    4.00    3.50
  -6   7  -3   29.40    7.30
   6  -7   3   23.20    7.70
  -7   7  -3    4.00    4.30
  -7  -6   3   54.29   11.80
  -6  -6   3  284.07   20.90
  -6  -6   3  261.07   10.60
  -6  -6   3  262.37   10.90
   5   6  -3    2.30    4.10
  -5  -6   3   -3.80    2.20
  -5  -6   3   -2.50    1.10
  -5  -6   3    1.00    1.40
   4   6  -3  153.88   14.40
  -4  -6   3  153.68    9.50
  -4  -6   3  156.18    9.00
  -4  -6   3  162.58   14.10
   3   6  -3 1346.77   56.79
  -3  -6   3 1288.67   49.30
  -3  -6   3 1382.36   49.30
  -3  -6   3 1333.67   56.49
   2   6  -3   44.60    7.70
  -2  -6   3   33.50    4.90
  -2  -6   3   23.40    6.40
  -2  -6   3   41.60    4.50
   1   6  -3   87.69    8.60
  -1  -6   3   71.79    6.50
  -1  -6   3   84.79    6.90
  -1  -6   3   79.29    8.80
   0   6  -3   33.80    6.30
   0  -6   3   33.30    6.70
   0  -6   3   44.10    6.00
   0  -6   3   36.20    5.50
  -1   6  -3   -0.10    1.10
  -1   6  -3   -1.20    1.30
   1  -6   3   -0.90    1.50
   1  -6   3   -1.50    1.70
  -2   6  -3  226.98   14.80
  -2   6  -3  207.68   13.70
   2  -6   3  224.58   13.50
   2  -6   3  213.88   14.90
  -3   6  -3    2.90    2.80
   3  -6   3    2.20    1.70
   3  -6   3    1.40    1.90
   3  -6   3    5.20    3.10
  -4   6  -3  413.16   22.40
   4  -6   3  411.66   23.00
   4  -6   3  410.16   21.30
   4  -6   3  382.06   23.40
  -5   6  -3    2.20    2.70
   5  -6   3   -5.10    2.40
   5  -6   3    5.00    2.90
   5  -6   3   -0.10    1.40
  -6   6  -3   24.70    6.30
   6  -6   3   16.50    4.20
   6  -6   3   17.40    6.30
  -7   6  -3   38.70    8.00
   7  -6   3   20.10    7.70
  -8   6  -3    0.20    4.00
   8  -6   3   -5.30    5.20
  -8  -5   3    1.10    3.00
  -7  -5   3   78.29   10.70
  -6  -5   3   46.10    9.00
   5   5  -3   10.60    5.80
  -5  -5   3   15.10    2.20
  -5  -5   3   16.10    5.50
  -5  -5   3   13.50    1.90
   4   5  -3   40.20    8.40
  -4  -5   3   42.80    3.80
  -4  -5   3   49.20    8.30
  -4  -5   3   46.80    3.60
   3   5  -3  268.67   17.30
  -3  -5   3  259.67   16.90
  -3  -5   3  237.08   11.80
  -3  -5   3  258.87   11.80
   2   5  -3  672.93   30.50
  -2  -5   3  533.05   29.40
  -2  -5   3  701.03   26.10
  -2  -5   3  659.33   25.80
  -1  -5   3    4.30    3.10
   0   5  -3    5.90    2.50
   0   5  -3   12.00    3.60
   0  -5   3    4.70    2.30
   0  -5   3    6.60    2.70
  -1   5  -3  787.02   32.80
   1  -5   3  806.62   34.70
  -2   5  -3  197.48   12.50
  -2   5  -3  198.18   13.30
   2  -5   3  223.98   14.10
   2  -5   3  198.98   12.00
  -3   5  -3  483.65   23.90
   3  -5   3  503.05   23.40
   3  -5   3  510.05   24.90
   3  -5   3  499.55   25.50
  -4   5  -3  240.48   14.90
   4  -5   3  223.38   13.70
   4  -5   3  222.98   16.10
   4  -5   3  211.28   14.90
  -5   5  -3   64.49    9.10
   5  -5   3   62.69   10.50
   5  -5   3   58.69    6.80
   5  -5   3   53.99    8.80
  -6   5  -3   37.70    7.40
   6  -5   3   51.89    7.30
   6  -5   3   37.10    8.20
  -7   5  -3   21.50    5.70
   7  -5   3   32.00    6.80
   7  -5   3   11.80    6.10
  -8   5  -3   12.10    5.30
   8  -5   3    1.20    5.80
  -7  -4   3   11.70    5.70
  -6  -4   3    4.00    3.20
   5   4  -3   -1.40    2.80
  -5  -4   3   -1.10    2.90
   4   4  -3   90.09   10.10
  -4  -4   3  107.89    9.90
  -4  -4   3  121.09    5.70
  -4  -4   3  121.09    5.40
   3   4  -3  322.57   19.50
  -3  -4   3  339.37   14.30
  -3  -4   3  370.06   14.20
  -3  -4   3  379.96   19.90
   2   4  -3  334.27   17.60
  -2  -4   3  321.77   13.50
  -2  -4   3  258.37   16.60
  -2  -4   3  307.07   13.30
   1   4  -3    3.30    1.70
   1   4  -3    2.20    2.10
  -1  -4   3    2.90    2.00
  -1  -4   3    0.50    1.00
   0   4  -3  234.58   12.10
   0   4  -3  230.18   13.30
   0  -4   3  234.68   11.80
   0  -4   3  249.68   13.80
  -1   4  -3  282.67   15.10
  -1   4  -3  297.17   14.50
   1  -4   3  270.77   15.10
   1  -4   3  280.57   13.90
  -2   4  -3  625.94   26.50
   2  -4   3  606.34   27.60
   2  -4   3  605.64   25.80
   2  -4   3  616.94   27.40
  -3   4  -3  160.48   10.90
   3  -4   3  164.58   12.10
   3  -4   3  178.68   10.80
   3  -4   3  161.88   11.40
  -4   4  -3  215.88   13.80
   4  -4   3  214.68   15.20
   4  -4   3  220.38   13.10
   4  -4   3  258.27   15.70
  -5   4  -3    5.60    3.60
   5  -4   3    5.90    2.50
   5  -4   3    4.10    3.60
   5  -4   3    2.10    2.70
  -6   4  -3  429.86   22.90
  -6   4  -3  417.46   25.40
   6  -4   3  391.56   24.90
   6  -4   3  414.26   21.20
   6  -4   3  449.95   26.80
  -7   4  -3   -0.90    3.90
  -7   4  -3    0.60    3.10
   7  -4   3    4.70    2.70
   7  -4   3    6.00    4.40
  -8   4  -3   97.39   11.00
  -8   4  -3  110.09   14.30
   8  -4   3  144.09   16.40
  -8  -3   3    1.80    2.60
  -7  -3   3   51.89    9.10
   6   3  -3  549.35   32.20
  -6  -3   3  636.74   31.40
   5   3  -3   52.39    9.00
  -5  -3   3   57.59    7.40
   4   3  -3  172.48   13.40
  -4  -3   3  208.58   13.30
   3   3  -3  114.29    9.90
  -3  -3   3  146.29   10.20
  -3  -3   3  142.89    5.80
  -3  -3   3  135.99    5.90
   2   3  -3 1449.65   53.79
  -2  -3   3 1397.76   48.90
  -2  -3   3 1399.26   49.00
   1   3  -3  134.59    8.80
   1   3  -3  137.09    7.20
  -1  -3   3  151.58    9.40
  -1  -3   3  135.09    7.10
   0   3  -3   64.49    5.50
   0   3  -3   59.69    4.70
   0  -3   3   69.59    4.80
   0  -3   3   60.09    5.50
  -1   3  -3   75.99    6.10
  -1   3  -3   70.49    5.40
   1  -3   3   66.39    5.20
   1  -3   3   67.39    6.00
  -2   3  -3 1473.75   55.09
   2  -3   3 1478.05   55.99
   2  -3   3 1505.85   54.79
   2  -3   3 1567.44   56.99
  -3   3  -3    4.80    2.40
   3  -3   3    5.70    2.90
   3  -3   3    6.80    2.50
  -4   3  -3  452.35   21.40
  -4   3  -3  431.46   22.90
   4  -3   3  440.56   22.80
   4  -3   3  450.35   20.50
  -5   3  -3  202.98   12.90
  -5   3  -3  177.88   14.10
   5  -3   3  179.38   11.40
   5  -3   3  180.68   13.80
  -6   3  -3   70.29    9.10
  -6   3  -3   70.89    9.40
   6  -3   3   65.29    6.90
   6  -3   3   84.49    9.50
  -7   3  -3    2.90    3.80
  -7   3  -3    2.10    3.50
   7  -3   3    8.80    4.10
  -8   3  -3    8.60    3.50
  -8   3  -3   -0.70    4.60
   8  -3   3    2.20    3.30
  -9  -2   3   19.60    7.50
  -8  -2   3    4.50    4.40
   7   2  -3   10.60    5.60
  -7  -2   3    4.60    3.60
   6   2  -3  775.92   37.60
  -6  -2   3  767.92   36.10
   5   2  -3    3.60    2.80
  -5  -2   3    2.10    1.80
   4   2  -3    4.30    2.60
  -4  -2   3    2.80    1.90
   3   2  -3   41.40    6.30
  -3  -2   3   43.20    5.20
   2   2  -3  231.98    8.80
   2   2  -3  213.48   11.90
  -2  -2   3  232.28   12.00
  -2  -2   3  228.88    8.60
   1   2  -3  788.62   28.00
   1   2  -3  781.12   29.90
  -1  -2   3  785.12   30.10
  -1  -2   3  770.12   27.80
   0   2  -3  597.84   22.60
   0   2  -3  579.04   23.40
   0  -2   3  595.24   22.40
   0  -2   3  617.94   23.70
  -1   2  -3    2.20    1.20
   1  -2   3    2.50    1.40
   1  -2   3    1.80    1.00
   1  -2   3    1.70    1.10
  -2   2  -3  642.94   26.90
  -2   2  -3  577.24   26.70
   2  -2   3  655.63   26.60
   2  -2   3  662.03   25.30
  -3   2  -3  986.80   39.90
  -3   2  -3  998.10   38.20
   3  -2   3  988.70   40.20
   3  -2   3  980.70   37.50
  -4   2  -3 1914.71   71.19
  -4   2  -3 1950.50   74.19
   4  -2   3 2004.40   70.59
   4  -2   3 1969.20   74.09
  -5   2  -3    8.40    3.50
  -5   2  -3    8.10    3.00
   5  -2   3    7.10    2.20
   5  -2   3   13.20    4.30
  -6   2  -3  365.46   22.90
  -6   2  -3  375.16   19.70
   6  -2   3  370.66   22.90
   6  -2   3  388.76   18.90
  -7   2  -3  341.27   23.70
  -7   2  -3  368.66   19.90
   7  -2   3  328.47   17.70
  -8   2  -3    1.40    4.90
  -8   2  -3   11.80    4.90
   8  -2   3   15.30    3.80
  -9  -1   3    2.20    4.00
  -8  -1   3  104.29   12.20
   7   1  -3   64.59    8.60
  -7  -1   3   64.09   10.10
   6   1  -3   63.49    8.30
  -6  -1   3   61.99    7.80
   5   1  -3    9.70    3.40
  -5  -1   3    7.80    3.30
   4   1  -3    9.30    3.30
  -4  -1   3    9.40    3.10
   3   1  -3  280.17   14.20
  -3  -1   3  280.47   13.80
   2   1  -3  379.06   13.80
  -2  -1   3  399.46   13.90
  -2  -1   3  414.26   16.70
   1   1  -3 1430.86   48.30
   1   1  -3 1415.96   49.40
  -1  -1   3 1377.76   48.20
  -1  -1   3 1439.26   49.60
   0   1  -3  773.62   28.00
   0   1  -3  772.32   27.60
   0  -1   3  742.43   27.50
   0  -1   3  778.92   28.10
  -1   1  -3   13.00    2.20
  -1   1  -3   14.70    2.60
   1  -1   3   15.50    2.60
   1  -1   3   16.60    2.40
  -2   1  -3 2225.38   77.99
  -2   1  -3 2202.08   76.39
   2  -1   3 2171.38   77.69
   2  -1   3 2164.68   76.09
  -3   1  -3    9.30    2.60
  -3   1  -3   16.30    3.80
   3  -1   3    9.70    2.20
  -4   1  -3  148.69   11.20
  -4   1  -3  144.89    9.40
   4  -1   3  155.78   11.30
  -5   1  -3    9.70    4.10
  -5   1  -3    7.20    2.80
   5  -1   3   10.70    3.80
   5  -1   3   13.70    3.10
  -6   1  -3   18.30    6.30
  -6   1  -3   25.80    4.80
   6  -1   3   25.50    6.40
   6  -1   3   25.10    4.40
  -7   1  -3  205.58   13.80
  -7   1  -3  209.48   17.70
   7  -1   3  205.38   12.50
  -8   1  -3   16.70    6.20
   8  -1   3   14.00    4.80
  -8   0   3   99.89   11.60
   7   0  -3   16.30    1.80
   7   0  -3   12.40    4.60
   7   0  -3   16.60    1.70
  -7   0   3   13.40    4.90
   6   0  -3    2.10    2.40
   6   0  -3   -0.50    0.60
   6   0  -3    1.90    1.10
  -6   0   3   -1.30    1.90
   5   0  -3   78.79    4.30
   5   0  -3   82.29    4.10
   5   0  -3   89.29    8.00
  -5   0   3   78.29    7.60
   4   0  -3   39.70    2.60
   4   0  -3   43.10    2.70
   4   0  -3   40.90    4.90
  -4   0   3   36.00    4.60
   3   0  -3   41.40    2.50
   3   0  -3   39.00    2.60
   3   0  -3   43.00    4.10
  -3   0   3   39.70    3.90
   2   0  -3 2746.13   91.69
   2   0  -3 2809.52   93.09
  -2   0   3 2727.63   92.79
  -2   0   3 2666.83   91.79
   1   0  -3   47.40    3.00
   1   0  -3   50.59    2.60
  -1   0   3   43.40    2.50
  -1   0   3   54.29    3.10
   0   0  -3 1361.06   45.30
   0   0  -3 1274.57   44.60
   0   0   3 1249.38   45.10
   0   0   3 1316.17   44.60
  -1   0  -3 1196.18   42.90
  -1   0  -3 1222.28   43.50
   1   0   3 1176.18   43.30
   1   0   3 1245.08   43.00
  -2   0  -3  304.37   14.80
  -2   0  -3  302.77   13.40
   2   0   3  294.47   13.30
   2   0   3  310.87   14.80
  -3   0  -3   98.39    6.50
  -3   0  -3   82.19    7.40
   3   0   3   86.29    6.00
  -4   0  -3    0.60    1.20
  -4   0  -3    1.10    1.80
   4   0   3    1.10    1.10
   4   0   3    1.40    1.00
  -5   0  -3    3.90    3.10
  -5   0  -3    0.90    2.10
   5   0   3    4.30    3.20
   5   0   3    4.40    1.80
  -6   0  -3  255.97   14.30
  -6   0  -3  231.08   17.50
   6   0   3  242.08   17.80
   6   0   3  239.68   13.30
  -7   0  -3   65.89   11.20
  -7   0  -3   53.89    7.40
   7   0   3   52.39    7.30
  -8   0  -3  173.18   17.30
  -8   0  -3  143.49   11.50
   8   0   3  142.69   10.60
   9  -1  -3    1.40    1.10
  -9   1   3    3.30    4.50
   8  -1  -3   25.30    2.60
   8  -1  -3   15.20    2.70
  -8   1   3   20.40    6.20
   7  -1  -3   28.90    3.70
   7  -1  -3   29.70    3.10
   7  -1  -3   38.50    7.50
  -7   1   3   31.40    7.00
   6  -1  -3    4.80    2.70
   6  -1  -3    3.60    1.50
   6  -1  -3    1.80    1.30
  -6   1   3   -0.30    1.90
   5  -1  -3   -0.90    0.90
   5  -1  -3    1.30    1.50
   5  -1  -3    0.20    1.10
  -5   1   3    2.10    2.00
   4  -1  -3  658.93   27.10
   4  -1  -3  641.74   24.30
   4  -1  -3  629.44   24.30
  -4   1   3  657.83   27.00
   3  -1  -3    3.30    1.70
   3  -1  -3    2.00    1.10
   3  -1  -3    3.30    1.30
  -3   1   3    3.30    1.60
   2  -1  -3  429.96   16.20
   2  -1  -3  428.96   16.50
  -2   1   3  430.26   16.20
  -2   1   3  426.96   16.80
   1  -1  -3  234.08   10.00
  -1   1   3  233.78   10.10
   0  -1  -3  525.95   21.10
   0  -1  -3  587.34   20.50
   0   1   3  557.84   21.30
   0   1   3  575.34   20.60
  -1  -1  -3   18.40    2.60
  -1  -1  -3   22.80    2.60
   1   1   3   21.40    2.90
   1   1   3   18.90    2.60
  -2  -1  -3    3.30    1.60
   2   1   3    7.00    2.30
   2   1   3    5.80    1.80
  -3  -1  -3  451.65   21.70
  -3  -1  -3  452.35   19.20
   3   1   3  460.95   19.20
   3   1   3  444.56   21.80
  -4  -1  -3  291.57   14.30
  -4  -1  -3  275.47   16.90
   4   1   3  290.37   14.10
   4   1   3  307.77   17.70
  -5  -1  -3   55.79    7.40
  -5  -1  -3   63.89    6.00
   5   1   3   61.29    8.30
   5   1   3   67.59    5.70
  -6  -1  -3  477.45   21.70
  -6  -1  -3  426.36   25.90
   6   1   3  445.76   20.70
  -7  -1  -3  312.37   22.60
  -7  -1  -3  311.07   17.00
  -8  -1  -3   -3.40    3.30
  -8  -1  -3   -5.40    4.00
   8   1   3   -8.10    2.60
   9  -2  -3   31.40    5.50
   9  -2  -3   45.50    4.10
  -9   2   3   51.59   10.40
   8  -2  -3   19.40    3.60
   8  -2  -3   22.60    3.30
  -8   2   3   20.70    6.40
   7  -2  -3    5.40    1.80
   7  -2  -3    2.90    2.00
   6  -2  -3  215.78   11.10
   6  -2  -3  210.88   14.30
   6  -2  -3  223.08   11.70
  -6   2   3  216.48   14.60
   5  -2  -3  134.39    8.10
   5  -2  -3  126.69    7.80
   5  -2  -3  138.69    9.90
  -5   2   3  129.19    9.70
   4  -2  -3  943.21   35.30
   4  -2  -3  936.51   36.70
   4  -2  -3  936.81   35.40
  -4   2   3  945.81   36.80
   3  -2  -3  152.68    8.40
   3  -2  -3  156.48    8.50
  -3   2   3  159.28    8.50
  -3   2   3  150.08    8.50
   2  -2  -3  131.09    6.60
   2  -2  -3  135.19    6.40
   2  -2  -3  125.59    7.20
  -2   2   3  132.09    7.50
   1  -2  -3  946.61   34.70
   1  -2  -3  983.10   33.40
  -1   2   3  937.61   33.10
  -1   2   3  919.51   34.80
   0  -2  -3  935.21   34.20
   0  -2  -3  973.00   33.70
   0   2   3  874.21   34.10
  -1  -2  -3 1044.30   40.00
  -1  -2  -3 1117.89   41.00
   1   2   3 1138.19   41.50
   1   2   3 1120.09   40.40
  -2  -2  -3  257.27   13.80
  -2  -2  -3  261.57   12.60
   2   2   3  260.17   14.20
   2   2   3  256.27   12.40
  -3  -2  -3  128.79    9.80
  -3  -2  -3  135.39    8.10
   3   2   3  116.49    7.70
   3   2   3  138.69   11.20
  -4  -2  -3   13.10    2.90
  -4  -2  -3   14.80    4.20
   4   2   3   15.60    4.20
   4   2   3   18.40    4.00
  -5  -2  -3   37.00    5.20
  -5  -2  -3   37.40    8.80
   5   2   3   42.20    4.60
  -6  -2  -3   26.50    6.70
  -6  -2  -3   24.70    4.60
   6   2   3   16.30    3.90
  -7  -2  -3    9.50    4.90
  -7  -2  -3    6.60    3.30
   7   2   3    6.00    3.00
  -8  -2  -3   16.50    7.10
  -8  -2  -3   11.20    4.70
   8   2   3    7.20    3.70
   9  -3  -3    7.00    2.80
   9  -3  -3    2.20    3.00
  -9   3   3    0.10    5.50
   8  -3  -3   26.00    4.00
   8  -3  -3   21.30    4.40
  -8   3   3   17.50    5.90
   7  -3  -3    0.80    1.90
   7  -3  -3   -1.80    2.00
   6  -3  -3   46.40    6.10
   6  -3  -3   54.49    7.90
   6  -3  -3   50.39    6.60
  -6   3   3   62.09    7.70
   5  -3  -3  181.48   10.60
   5  -3  -3  182.58   10.70
   5  -3  -3  168.08   11.40
  -5   3   3  166.88   11.40
   4  -3  -3   11.50    2.80
   4  -3  -3   10.00    2.50
   4  -3  -3   14.20    3.20
   4  -3  -3   16.10    3.70
   3  -3  -3    7.60    2.30
   3  -3  -3    8.90    2.10
   3  -3  -3    7.50    2.30
  -3   3   3   10.10    2.80
   2  -3  -3  411.76   16.70
  -2   3   3  376.26   17.60
   1  -3  -3 1592.14   54.79
  -1   3   3 1547.95   54.49
  -1   3   3 1491.65   55.69
   0  -3  -3   51.09    4.60
   0  -3  -3   44.10    4.90
   0   3   3   47.90    4.60
   0   3   3   54.59    4.70
  -1  -3  -3    0.10    1.50
  -1  -3  -3    4.50    1.70
   1   3   3    2.90    1.90
   1   3   3    1.00    2.10
  -2  -3  -3  877.81   35.20
  -2  -3  -3  867.81   33.00
   2   3   3  829.12   33.00
   2   3   3  840.22   35.80
  -3  -3  -3   19.00    4.50
  -3  -3  -3   23.40    3.70
   3   3   3   24.00    5.20
   3   3   3   23.40    4.50
  -4  -3  -3    5.40    2.20
  -4  -3  -3    9.70    4.00
   4   3   3    4.90    2.00
   4   3   3    6.70    3.00
  -5  -3  -3   20.70    5.90
  -5  -3  -3   23.10    4.50
   5   3   3   21.90    6.10
   5   3   3   22.90    4.20
  -6  -3  -3    7.30    2.90
  -6  -3  -3   13.60    5.40
   6   3   3   10.10    3.40
  -7  -3  -3    4.50    3.80
  -7  -3  -3   -3.70    2.60
   7   3   3    1.00    2.50
   9  -4  -3    0.50    5.00
   9  -4  -3    1.40    3.20
   9  -4  -3   -1.40    2.80
   8  -4  -3   10.70    3.50
   8  -4  -3    1.90    3.00
   8  -4  -3   10.40    4.90
   7  -4  -3   19.20    6.10
   7  -4  -3   19.60    4.20
   7  -4  -3   24.10    5.80
   7  -4  -3   22.30    4.70
   6  -4  -3    8.20    3.80
   6  -4  -3    8.30    3.10
   6  -4  -3    6.20    2.90
   6  -4  -3   10.10    3.70
   5  -4  -3  246.98   14.20
   5  -4  -3  253.47   14.70
   5  -4  -3  250.07   14.20
   5  -4  -3  263.47   15.50
   4  -4  -3  146.19    9.90
   4  -4  -3  140.79   10.00
   4  -4  -3  149.69    9.60
   4  -4  -3  152.48   10.00
   3  -4  -3  230.38   12.60
   3  -4  -3  236.18   12.10
   3  -4  -3  234.58   13.00
  -3   4   3  250.87   15.30
   2  -4  -3   42.90    5.00
   2  -4  -3   43.30    4.50
  -2   4   3   46.40    4.50
  -2   4   3   45.30    5.00
   1  -4  -3  892.21   35.50
   1  -4  -3  942.81   35.50
  -1   4   3  890.61   36.00
  -1   4   3  925.01   35.10
   0  -4  -3    9.70    2.80
   0   4   3    8.80    2.80
   0   4   3   21.00    4.10
  -1  -4  -3  149.69    9.00
  -1  -4  -3  151.38   10.00
   1   4   3  119.79    9.70
   1   4   3  126.59    8.70
  -2  -4  -3    2.10    1.30
  -2  -4  -3    0.20    1.90
   2   4   3   -1.50    1.20
   2   4   3    4.20    1.60
  -3  -4  -3   68.49    6.10
  -3  -4  -3   70.59    7.50
   3   4   3   71.89    8.30
   3   4   3   72.49    6.30
  -4  -4  -3   70.19    8.30
  -4  -4  -3   57.29    5.70
   4   4   3   74.89    6.50
   4   4   3   70.79   11.30
  -5  -4  -3    4.90    4.00
  -5  -4  -3    2.60    2.40
   5   4   3    4.30    2.40
   5   4   3    5.00    3.80
  -6  -4  -3   29.00    7.70
  -6  -4  -3   20.60    4.40
   6   4   3   20.60    4.50
  -7  -4  -3   82.49    7.90
  -7  -4  -3   79.69   13.40
   7   4   3   66.89    7.30
   8  -5  -3   18.80    6.30
   8  -5  -3   18.00    5.00
   8  -5  -3    5.30    4.50
   7  -5  -3   38.00    6.20
   7  -5  -3   29.60    5.80
   7  -5  -3   31.80    7.30
   7  -5  -3   20.30    5.70
   6  -5  -3    4.20    3.20
   6  -5  -3    3.50    3.40
   6  -5  -3   11.20    3.80
   6  -5  -3    7.40    3.10
   5  -5  -3  102.29    8.90
   5  -5  -3   90.89    8.60
   5  -5  -3   99.99    8.60
   5  -5  -3   97.19    9.20
   4  -5  -3   13.30    3.60
   4  -5  -3   25.20    5.10
   4  -5  -3   24.60    4.80
   3  -5  -3  582.84   24.40
   3  -5  -3  583.34   25.70
   3  -5  -3  550.14   25.00
   3  -5  -3  540.65   25.50
  -3   5   3  547.35   25.60
   2  -5  -3  193.98   12.20
   2  -5  -3  205.88   13.80
  -2   5   3  216.98   12.90
  -2   5   3  205.58   11.70
   1  -5  -3  172.58   10.70
  -1   5   3  166.88   10.70
  -1   5   3  168.68   11.10
   0  -5  -3  519.05   24.90
   0  -5  -3  530.65   23.90
   0   5   3  567.54   25.20
   0   5   3  561.14   24.70
  -1  -5  -3   82.09    7.80
  -1  -5  -3   76.69    6.80
   1   5   3   75.99    6.90
   1   5   3   92.89    9.90
  -2  -5  -3   10.00    3.10
  -2  -5  -3    6.40    3.10
   2   5   3   11.60    3.30
   2   5   3    9.30    3.40
  -3  -5  -3  295.67   15.00
  -3  -5  -3  278.37   17.60
   3   5   3  218.98   17.60
   3   5   3  301.17   15.60
  -4  -5  -3    8.80    3.30
  -4  -5  -3   16.60    5.30
   4   5   3   11.80    4.90
   4   5   3   14.20    3.70
  -5  -5  -3    9.40    3.10
  -5  -5  -3   13.10    5.20
   5   5   3   11.40    3.40
  -6  -5  -3   99.99    8.60
  -6  -5  -3  119.29   13.40
   6   5   3  108.39    9.00
  -7  -5  -3    1.90    4.90
  -7  -5  -3    3.70    3.40
   8  -6  -3   59.99    9.70
   8  -6  -3   84.19    8.90
   8  -6  -3   53.79   10.50
   7  -6  -3   18.40    5.00
   7  -6  -3   19.70    5.40
   7  -6  -3    9.40    4.30
   7  -6  -3   18.00    6.20
   6  -6  -3  126.79   10.60
   6  -6  -3  115.69   11.30
   6  -6  -3  113.19   10.20
   6  -6  -3  135.59   11.10
   5  -6  -3    4.00    3.30
   5  -6  -3    3.50    2.20
   5  -6  -3    5.00    3.20
   5  -6  -3    3.80    2.80
   4  -6  -3  445.86   21.40
   4  -6  -3  411.96   22.20
   4  -6  -3  418.16   22.00
   4  -6  -3  438.86   22.40
   3  -6  -3   -0.50    1.20
   3  -6  -3    0.60    1.60
   3  -6  -3    3.00    2.20
  -3   6   3    1.20    2.20
   2  -6  -3  115.69    9.40
   2  -6  -3  114.59    9.20
  -2   6   3  115.89    9.50
  -2   6   3  112.69    9.00
   1  -6  -3  459.85   23.20
   1  -6  -3  498.85   23.10
  -1   6   3  483.55   23.50
  -1   6   3  474.45   22.90
   0  -6  -3  227.48   15.40
   0  -6  -3  280.97   15.20
   0   6   3  267.17   16.00
   0   6   3  289.27   16.00
  -1  -6  -3   12.70    3.20
  -1  -6  -3    8.10    3.60
   1   6   3    2.10    2.90
   1   6   3   11.70    3.40
  -2  -6  -3   68.69    7.80
  -2  -6  -3   72.19    6.90
   2   6   3   59.39    7.90
   2   6   3   55.29    6.50
  -3  -6  -3    7.20    3.00
  -3  -6  -3    9.60    4.00
   3   6   3    5.50    3.00
   3   6   3    6.40    4.20
  -4  -6  -3   88.79    7.80
  -4  -6  -3   75.69    9.60
   4   6   3  101.99   12.80
   4   6   3   75.39    8.00
  -5  -6  -3   25.80    5.00
  -5  -6  -3   14.90    6.00
   5   6   3   15.40    4.70
  -6  -6  -3   -3.50    2.90
  -6  -6  -3    5.60    4.70
   6   6   3   -1.70    3.20
   8  -7  -3   90.19   14.00
   8  -7  -3   90.89   12.30
   7  -7  -3   24.80    6.80
   7  -7  -3   42.60    9.00
   6  -7  -3   28.00    8.00
   6  -7  -3   28.30    7.10
   6  -7  -3   32.60    7.00
   6  -7  -3   24.30    6.30
   5  -7  -3   14.30    4.60
   5  -7  -3   20.30    5.60
   5  -7  -3   18.30    5.00
   5  -7  -3   14.10    4.70
   4  -7  -3   81.29    8.90
   4  -7  -3   95.29    8.50
   4  -7  -3   79.89    8.80
   4  -7  -3   92.89    9.60
   3  -7  -3  504.65   25.60
   3  -7  -3  506.25   25.70
   3  -7  -3  506.45   26.00
  -3   7   3  535.65   25.30
   2  -7  -3   52.59    7.60
   2  -7  -3   47.10    6.40
  -2   7   3   47.00    7.20
  -2   7   3   33.80    6.30
   1  -7  -3    3.10    2.50
   1  -7  -3    4.30    2.60
  -1   7   3   -0.60    1.60
  -1   7   3    1.70    2.00
   0  -7  -3    7.30    2.90
   0  -7  -3    5.40    3.70
   0   7   3   15.20    4.70
   0   7   3   13.20    3.90
  -1  -7  -3  106.69    9.20
  -1  -7  -3  114.19   10.80
   1   7   3   99.79   10.40
   1   7   3   95.19    9.10
  -2  -7  -3  700.73   31.50
  -2  -7  -3  755.32   35.40
   2   7   3  715.43   32.80
   2   7   3  698.13   35.90
  -3  -7  -3  153.28   11.20
  -3  -7  -3  148.99   13.50
   3   7   3  141.99   11.40
   3   7   3  147.89   14.90
  -4  -7  -3   18.20    4.70
  -4  -7  -3   17.70    6.10
   4   7   3   34.40    6.60
  -5  -7  -3  104.39   12.60
  -5  -7  -3  102.19    9.20
   5   7   3  106.39   10.30
  -6  -7  -3   27.20    8.50
  -6  -7  -3   34.70    6.50
   6   7   3   43.80    6.90
   7  -8  -3   28.90    8.20
   7  -8  -3   40.40    8.40
   6  -8  -3   -3.90    2.80
   6  -8  -3    0.80    3.70
   6  -8  -3   -2.00    3.10
   5  -8  -3   39.50    7.50
   5  -8  -3   31.20    7.30
   5  -8  -3   41.60    7.10
   4  -8  -3   41.20    7.60
   4  -8  -3   43.30    7.90
   4  -8  -3   56.19    9.20
   4  -8  -3   52.49    7.00
   3  -8  -3  109.49   10.70
   3  -8  -3  107.19   10.50
   3  -8  -3  102.49   10.20
  -3   8   3   88.19    9.10
   2  -8  -3   94.89   10.10
   2  -8  -3  101.59    9.70
  -2   8   3   78.79    8.90
  -2   8   3   94.59    9.50
   1  -8  -3  114.69   11.50
   1  -8  -3  139.19   11.20
  -1   8   3  126.79   11.10
  -1   8   3  122.69   11.00
   0  -8  -3   21.90    6.10
   0  -8  -3   21.90    6.20
   0   8   3   30.10    6.20
   0   8   3   31.20    7.80
  -1  -8  -3   62.69   10.20
  -1  -8  -3   54.59    8.20
   1   8   3   60.79    9.10
   1   8   3   49.60    9.20
  -2  -8  -3  157.98   14.10
  -2  -8  -3  150.48   11.90
   2   8   3  170.88   15.70
   2   8   3  148.79   12.40
  -3  -8  -3   -6.00    2.80
  -3  -8  -3    5.00    2.80
   3   8   3    1.20    2.90
  -4  -8  -3   93.99   12.00
  -4  -8  -3   70.29    7.60
   4   8   3   75.59    8.80
  -5  -8  -3   78.19   13.10
  -5  -8  -3   90.49    9.10
   5   8   3  113.69   12.10
   7  -9  -3  168.88   16.70
   6  -9  -3   -8.60    3.00
   6  -9  -3   -5.10    4.00
   5  -9  -3  380.46   22.20
   5  -9  -3  344.37   22.30
   5  -9  -3  332.27   22.10
   4  -9  -3    2.30    3.20
   4  -9  -3    2.50    3.50
   4  -9  -3    0.30    3.50
   3  -9  -3    2.60    3.30
   3  -9  -3   -2.60    3.00
  -3   9   3    2.90    3.40
   2  -9  -3  513.05   28.20
   2  -9  -3  492.35   26.80
  -2   9   3  493.25   26.80
   1  -9  -3   26.40    7.60
   1  -9  -3   24.50    6.20
  -1   9   3   29.30    6.90
  -1   9   3   33.00    8.00
   0  -9  -3  198.48   14.50
   0  -9  -3  187.98   16.50
   0   9   3  194.78   15.90
   0   9   3  201.78   15.80
  -1  -9  -3  101.69   10.20
  -1  -9  -3  109.09   12.30
   1   9   3   98.69   10.70
   1   9   3  132.99   13.20
  -2  -9  -3   38.20    8.60
  -2  -9  -3   45.40    7.70
  -3  -9  -3    2.60    4.40
  -3  -9  -3    6.20    3.60
  -4  -9  -3   11.60    4.30
  -4  -9  -3    8.10    6.20
   6 -10  -3  175.18   16.30
   5 -10  -3   11.20    6.30
   5 -10  -3   26.10    7.60
   4 -10  -3  136.89   13.70
   4 -10  -3  147.79   14.40
   4 -10  -3  143.19   13.10
   3 -10  -3   44.50    9.00
   3 -10  -3   48.70    9.90
  -3  10   3   47.80    8.50
   2 -10  -3    2.20    4.40
   2 -10  -3    3.10    3.40
  -2  10   3    7.10    4.80
   1 -10  -3   53.59   10.40
   1 -10  -3   67.39   10.40
  -1  10   3   51.29    9.50
   0 -10  -3   12.10    4.00
   0 -10  -3   10.60    6.10
   0  10   3    5.10    5.10
  -1 -10  -3   -3.20    3.40
  -1 -10  -3    2.30    3.50
  -2 -10  -3   41.20    7.70
  -2 -10  -3   58.29   11.30
  -3 -10  -3   62.19    9.40
  -3 -10  -3   45.60   10.30
  -4 -10  -3   63.09    9.50
  -4 -10  -3   54.79   11.10
   5 -11  -3   -6.20    4.20
   5 -11  -3   -5.10    4.70
   4 -11  -3   33.60    7.90
   4 -11  -3   31.20    8.20
   3 -11  -3   45.40   10.00
   3 -11  -3   46.80    9.10
   2 -11  -3    9.90    5.20
   2 -11  -3   18.50    6.20
   1 -11  -3  214.68   16.70
   1 -11  -3  157.38   16.30
   0 -11  -3   -1.50    3.70
   0 -11  -3   -5.40    3.60
  -1 -11  -3   28.40    7.00
  -1 -11  -3   20.60    7.30
  -2 -11  -3   -4.50    4.00
  -2 -11  -3   -2.70    3.80
   3 -12  -3    1.40    6.10
   2 -12  -3   48.10    9.30
   2 -12  -3    6.80    6.40
   1 -12  -3   11.90    6.00
   1 -12  -3   12.50    7.20
   0 -12  -3   34.90    8.50
   0 -12  -3   16.00    9.30
   0 -13   4   17.60    8.60
   0 -13   4   14.00    7.30
   1 -13   4   15.80    7.00
   1 -13   4    5.90    7.80
  -3 -12   4   34.40    8.10
  -2 -12   4   16.00    5.80
  -2 -12   4    8.90    6.80
  -1 -12   4   16.70    8.70
  -1 -12   4   43.70    8.90
   0 -12   4   51.49   10.20
   1 -12   4    3.60    4.50
   2 -12   4   12.60    7.50
   2 -12   4   15.90    6.20
   3 -12   4  183.88   17.50
   3 -12   4  196.68   20.20
   4 -12   4   47.90   12.20
  -4 -11   4   10.70    5.40
  -4 -11   4    9.30    5.60
  -4 -11   4   22.90    6.10
  -3 -11   4   20.60    6.20
  -3 -11   4   24.80    8.70
  -3 -11   4   13.30    5.10
  -2 -11   4   18.80    7.70
  -2 -11   4    7.10    4.30
  -1 -11   4   -5.30    2.70
  -1 -11   4   -6.30    4.30
   0 -11   4   15.90    5.30
   0 -11   4   24.60    7.90
   1 -11   4   23.40    7.10
   1 -11   4   15.30    6.60
   2 -11   4   24.20    7.40
   2 -11   4   31.50    8.80
   3 -11   4   83.79   12.70
   3 -11   4   85.59   14.60
   4 -11   4   19.00    6.70
   4 -11   4   19.00    6.80
   5 -11   4   18.40    8.30
   5 -11   4   25.70    7.30
  -5 -10   4   -0.80    2.80
  -5 -10   4   -6.30    3.70
  -5 -10   4    7.80    5.80
  -4 -10   4    8.50    6.80
  -4 -10   4    2.30    2.70
  -4 -10   4    7.30    3.90
  -3 -10   4  100.29    9.60
  -3 -10   4   71.39   13.10
  -3 -10   4   91.39    9.20
  -2 -10   4    7.30    3.90
  -2 -10   4   16.00    4.50
  -2 -10   4    1.00    4.20
  -1 -10   4  263.47   17.10
  -1 -10   4  246.78   21.40
  -1 -10   4  265.47   17.50
   0 -10   4   42.40    7.40
   0 -10   4   40.80    9.70
   0 -10   4   37.50    7.20
   1 -10   4   -4.40    2.50
   1 -10   4    1.60    4.50
   2 -10   4  106.59   13.40
   2 -10   4  105.69   11.60
   3 -10   4   -2.40    3.40
   3 -10   4    0.40    3.50
   4 -10   4  101.59   13.50
   4 -10   4  110.09   12.70
   5 -10   4    8.10    5.90
   6 -10   4   19.60    8.70
   6 -10   4   16.00    7.10
  -6  -9   4  119.59    7.70
  -6  -9   4   85.79   15.00
  -5  -9   4   -2.10    2.60
  -5  -9   4    1.70    2.70
  -5  -9   4    1.00    5.70
  -4  -9   4   18.10    4.30
  -4  -9   4   17.40    3.90
  -4  -9   4   30.10    8.10
  -3  -9   4  593.44   27.20
  -3  -9   4  565.44   34.20
   2   9  -4    1.90    3.80
  -2  -9   4    0.70    3.00
  -2  -9   4    2.80    2.90
  -2  -9   4    3.10    3.30
   1   9  -4   -4.90    2.70
  -1  -9   4    0.80    2.40
  -1  -9   4   -1.30    2.40
  -1  -9   4   -5.90    3.40
   0   9  -4   74.19    9.90
   0  -9   4   72.69   11.90
   0  -9   4   65.39    9.20
   0  -9   4   75.19   11.40
  -1   9  -4  376.16   23.70
   1  -9   4  365.66   21.00
   1  -9   4  358.86   21.40
   1  -9   4  340.97   23.60
  -2   9  -4   23.70    6.50
   2  -9   4   21.50    5.00
   2  -9   4   23.70    6.00
   2  -9   4   30.90    8.00
   3  -9   4    1.00    3.80
   3  -9   4   -0.70    3.00
   4  -9   4   -3.30    3.30
   4  -9   4    1.70    3.70
   5  -9   4   -1.10    3.00
   5  -9   4    0.50    3.90
   6  -9   4   -3.30    4.60
   6  -9   4   -0.10    4.00
  -6  -8   4   64.29    7.20
  -6  -8   4   48.00   13.50
  -6  -8   4   49.99    4.70
  -5  -8   4   14.00    3.80
  -5  -8   4   28.30    8.30
  -5  -8   4   19.70    3.70
  -4  -8   4  121.49    9.00
  -4  -8   4  116.69   13.50
  -4  -8   4  134.69    8.90
   3   8  -4  272.27   20.60
  -3  -8   4  296.87   16.00
  -3  -8   4  313.07   16.20
  -3  -8   4  284.57   21.40
   2   8  -4   31.50    9.00
  -2  -8   4   28.60    5.50
  -2  -8   4   32.80    8.40
  -2  -8   4   33.50    5.80
   1   8  -4    7.80    4.50
  -1  -8   4   11.70    4.20
  -1  -8   4   16.30    4.00
  -1  -8   4    9.30    4.10
   0   8  -4    8.00    3.80
   0  -8   4    5.80    4.10
   0  -8   4   11.70    3.50
   0  -8   4    6.90    3.60
  -1   8  -4    5.00    3.70
   1  -8   4    1.00    2.30
   1  -8   4    0.30    1.90
   1  -8   4    1.50    2.30
  -2   8  -4    2.20    2.70
   2  -8   4   10.30    4.50
  -3   8  -4   20.20    5.40
  -3   8  -4   10.50    4.10
   3  -8   4   17.90    4.80
   3  -8   4   14.60    5.10
   3  -8   4   14.50    4.80
  -4   8  -4    0.70    2.70
   4  -8   4    3.40    3.70
  -5   8  -4  114.49   11.80
   5  -8   4   95.99   12.60
  -6   8  -4  138.99   13.90
   6  -8   4  151.28   16.50
  -7   8  -4   22.20    7.00
   7  -8   4   18.40    8.50
   7  -8   4   43.30    9.30
  -7  -7   4   15.60    7.50
  -6  -7   4   70.39    4.20
  -6  -7   4   68.49    4.00
  -6  -7   4   82.09   11.10
  -5  -7   4  133.49    8.60
  -5  -7   4  163.38   15.20
  -5  -7   4  149.69    8.50
   4   7  -4  294.37   21.30
  -4  -7   4  274.77   19.90
  -4  -7   4  273.67   13.90
   3   7  -4   -1.90    3.00
  -3  -7   4   16.70    5.90
  -3  -7   4    1.20    1.80
   2   7  -4   84.79   10.00
  -2  -7   4   83.39    7.50
  -2  -7   4   87.49    7.30
  -2  -7   4   78.89   10.30
   1   7  -4   -0.90    2.30
  -1  -7   4    1.90    1.90
  -1  -7   4    3.00    2.60
  -1  -7   4    1.60    2.20
   0   7  -4  310.27   19.30
   0  -7   4  322.27   17.10
   0  -7   4  308.97   17.40
   0  -7   4  305.37   19.70
  -1   7  -4  152.98   12.40
  -1   7  -4  140.79   11.00
   1  -7   4  153.18   10.90
   1  -7   4  140.19   12.40
  -2   7  -4   54.49    8.20
  -2   7  -4   53.19    7.20
   2  -7   4   57.69    7.90
   2  -7   4   62.39    6.80
  -3   7  -4  604.34   29.30
   3  -7   4  531.95   28.90
   3  -7   4  601.84   28.30
   3  -7   4  587.54   31.00
  -4   7  -4  389.76   22.80
   4  -7   4  372.46   23.00
   4  -7   4  411.26   22.00
   4  -7   4  382.56   24.40
  -5   7  -4  672.93   32.90
   5  -7   4  585.74   33.90
  -6   7  -4   24.00    6.40
   6  -7   4   22.20    8.10
  -7   7  -4   36.50    8.80
   7  -7   4   22.60    8.70
  -7  -6   4    2.50    4.90
  -6  -6   4  218.78   17.90
   5   6  -4   -0.20    2.60
  -5  -6   4   -1.30    1.00
  -5  -6   4   -0.80    3.40
  -5  -6   4    1.10    1.30
   4   6  -4  229.78   17.40
  -4  -6   4  215.38   10.50
  -4  -6   4  211.08   10.80
  -4  -6   4  231.88   16.80
   3   6  -4  942.91   43.30
  -3  -6   4  912.21   43.00
  -3  -6   4  939.51   36.30
  -3  -6   4 1003.70   36.80
   2   6  -4  176.98   13.50
  -2  -6   4  141.39   13.00
  -2  -6   4  165.38    9.90
  -2  -6   4  189.78   10.60
   1   6  -4  184.38   13.60
  -1  -6   4  188.58   11.40
  -1  -6   4  184.48   12.50
  -1  -6   4  194.98   14.30
   0   6  -4  161.68   12.50
   0   6  -4  179.48   11.60
   0  -6   4  173.98   13.30
   0  -6   4  194.08   11.50
  -1   6  -4   51.49    6.60
  -1   6  -4   56.59    6.30
   1  -6   4   51.49    8.20
   1  -6   4   59.49    6.00
  -2   6  -4   86.69    8.90
  -2   6  -4   83.49    8.00
   2  -6   4   75.79    8.70
   2  -6   4   77.99    7.30
  -3   6  -4  538.85   26.60
   3  -6   4  531.15   28.20
   3  -6   4  515.45   27.00
   3  -6   4  570.64   26.10
  -4   6  -4  276.47   17.40
   4  -6   4  275.17   20.50
   4  -6   4  246.88   15.80
  -5   6  -4   61.39    9.20
   5  -6   4   53.79   10.10
   5  -6   4   66.59    7.60
   5  -6   4   54.39    9.30
  -6   6  -4   20.30    5.80
   6  -6   4   22.00    7.30
  -7   6  -4    9.00    5.70
  -8  -5   4   10.00    6.50
  -7  -5   4   12.60    6.20
  -6  -5   4  110.99   11.70
  -5  -5   4   16.90    1.30
   4   5  -4   14.20    5.00
  -4  -5   4   13.50    4.90
  -4  -5   4   14.90    2.20
  -4  -5   4   13.90    2.30
   3   5  -4  857.31   38.30
  -3  -5   4  822.32   37.90
  -3  -5   4  838.02   31.50
  -3  -5   4  839.92   31.50
   2   5  -4   12.30    3.90
  -2  -5   4   11.20    2.70
  -2  -5   4    4.80    3.10
  -2  -5   4    8.50    2.40
   1   5  -4  176.88   10.20
   1   5  -4  163.28   11.70
  -1  -5   4  163.38   12.20
  -1  -5   4  168.38    9.70
   0   5  -4  568.54   24.80
   0   5  -4  609.24   30.10
   0  -5   4  531.55   24.00
   0  -5   4  588.14   27.20
  -1   5  -4  387.06   20.10
  -1   5  -4  364.66   18.50
   1  -5   4  391.36   18.40
   1  -5   4  375.36   20.20
  -2   5  -4  139.39   10.90
  -2   5  -4  132.49    9.90
   2  -5   4  152.58   10.00
   2  -5   4  136.39   11.10
  -3   5  -4  439.26   22.80
   3  -5   4  482.35   25.10
   3  -5   4  489.15   24.30
   3  -5   4  465.35   22.40
  -4   5  -4    1.20    2.80
   4  -5   4    1.80    2.80
   4  -5   4    0.10    1.80
   4  -5   4   -0.50    1.40
  -5   5  -4   32.60    6.80
   5  -5   4   43.80    8.00
   5  -5   4   39.70    8.50
   5  -5   4   40.10    6.50
  -6   5  -4    3.20    3.30
   6  -5   4    0.30    2.50
   6  -5   4   -0.90    2.60
  -7   5  -4    8.70    4.90
   7  -5   4   -1.20    4.90
  -8   5  -4    6.70    4.80
   8  -5   4    2.80    6.30
  -8  -4   4  128.99   14.20
  -7  -4   4   27.90    7.40
   6   4  -4    0.70    4.10
  -6  -4   4   -3.00    1.70
   5   4  -4  136.09   13.10
  -5  -4   4  177.48   13.80
   4   4  -4   33.70    7.00
  -4  -4   4   39.40    2.20
  -4  -4   4   36.90    2.50
  -4  -4   4   41.70    7.20
   3   4  -4  248.58   15.50
  -3  -4   4  234.88   10.20
  -3  -4   4  230.78   10.20
  -3  -4   4  238.38   15.10
   2   4  -4   33.10    5.80
  -2  -4   4   24.10    5.20
  -2  -4   4   33.70    3.20
   1   4  -4   13.70    3.50
   1   4  -4   13.30    2.80
  -1  -4   4   14.70    3.80
  -1  -4   4   14.80    2.80
   0   4  -4   43.10    4.70
   0   4  -4   38.40    4.80
   0  -4   4   40.20    5.30
   0  -4   4   40.70    4.10
  -1   4  -4   37.30    4.90
  -1   4  -4   41.40    4.60
   1  -4   4   45.00    4.70
   1  -4   4   34.10    5.90
  -2   4  -4   46.70    5.20
   2  -4   4   40.10    4.50
   2  -4   4   40.70    5.10
   2  -4   4   31.10    5.90
  -3   4  -4  267.67   15.00
   3  -4   4  259.47   15.70
   3  -4   4  249.78   16.20
   3  -4   4  274.17   14.60
  -4   4  -4    5.30    2.60
   4  -4   4    4.90    2.40
   4  -4   4    3.50    2.50
   4  -4   4    5.30    3.10
  -5   4  -4  158.48   12.30
   5  -4   4  174.98   11.80
   5  -4   4  157.68   13.20
   5  -4   4  179.78   15.00
  -6   4  -4    0.20    3.60
  -6   4  -4    4.50    3.40
   6  -4   4    6.00    2.50
   6  -4   4   -0.50    3.60
  -7   4  -4    3.30    3.10
  -7   4  -4    0.70    4.60
   7  -4   4   -3.30    3.50
   7  -4   4    3.10    3.00
  -8   4  -4   31.40    8.30
  -8   4  -4   28.90    7.80
   8  -4   4   26.60    8.30
  -8  -3   4   29.10    7.80
  -7  -3   4  165.18   14.70
   6   3  -4    0.20    3.80
  -6  -3   4    0.70    2.50
   5   3  -4  435.66   25.90
  -5  -3   4  544.85   26.00
   4   3  -4  160.88   12.80
  -4  -3   4  211.28   13.20
   3   3  -4  325.07   18.20
  -3  -3   4  348.67   12.90
  -3  -3   4  380.16   18.70
  -3  -3   4  339.97   12.70
   2   3  -4    3.60    2.10
   2   3  -4    0.00    0.70
  -2  -3   4    1.10    0.90
   1   3  -4    7.30    2.50
   1   3  -4    7.60    2.00
  -1  -3   4    6.60    2.30
  -1  -3   4    6.30    1.70
   0   3  -4 1458.25   54.19
   0   3  -4 1482.65   52.89
   0  -3   4 1475.95   54.49
   0  -3   4 1466.75   52.49
  -1   3  -4  211.98   11.20
  -1   3  -4  209.98   11.90
   1  -3   4  225.88   14.10
   1  -3   4  197.38   10.70
  -2   3  -4  273.07   14.10
   2  -3   4  291.07   15.70
   2  -3   4  268.67   14.80
   2  -3   4  274.07   13.80
  -3   3  -4 1217.48   47.40
   3  -3   4 1245.48   46.70
   3  -3   4 1238.28   49.70
   3  -3   4 1214.28   48.80
  -4   3  -4  606.94   28.10
  -4   3  -4  643.54   30.50
   4  -3   4  652.93   30.40
   4  -3   4  643.44   27.50
  -5   3  -4  514.15   25.50
   5  -3   4  558.74   24.90
  -6   3  -4  153.88   14.00
  -6   3  -4  149.39   11.80
   6  -3   4  147.09   10.80
  -7   3  -4    2.50    3.50
  -7   3  -4    3.80    4.40
   7  -3   4   14.00    3.40
  -8   3  -4   53.29    8.80
  -8   3  -4   36.90    9.60
  -9  -2   4  184.68   17.30
  -8  -2   4    3.00    3.40
   7   2  -4  208.68   18.00
  -7  -2   4  262.67   18.10
   6   2  -4  662.03   33.90
  -6  -2   4  691.63   32.80
   5   2  -4  101.59    9.90
  -5  -2   4  109.19    9.40
  -4  -2   4  780.82   33.00
   3   2  -4 3110.89  110.09
   2   2  -4 2117.09   69.59
   2   2  -4 2113.39   73.29
  -2  -2   4 2190.08   69.39
  -2  -2   4 1777.62   72.49
   1   2  -4 1563.44   55.99
   1   2  -4 1567.64   54.29
  -1  -2   4 1576.34   56.19
  -1  -2   4 1546.15   54.09
   0   2  -4 1531.05   53.59
   0   2  -4 1520.55   54.39
   0  -2   4 1499.45   54.49
   0  -2   4 1515.55   53.29
  -1   2  -4 2091.29   73.89
   1  -2   4 2107.89   74.59
   1  -2   4 2118.39   75.09
   1  -2   4 2112.59   73.69
  -2   2  -4 1214.38   47.40
  -2   2  -4 1292.67   46.50
   2  -2   4 1247.08   47.50
   2  -2   4 1235.98   45.90
  -3   2  -4 1224.78   49.20
  -3   2  -4 1252.77   47.40
   3  -2   4 1250.07   49.20
   3  -2   4 1277.37   47.30
  -4   2  -4 1162.68   45.40
  -4   2  -4 1151.68   48.00
   4  -2   4 1148.89   44.50
   4  -2   4 1171.28   47.90
  -5   2  -4  117.19   11.80
  -5   2  -4  132.49   10.20
   5  -2   4  118.79    9.00
   5  -2   4  131.79   11.60
  -6   2  -4  501.35   24.60
  -6   2  -4  465.15   27.50
   6  -2   4  483.55   23.10
  -7   2  -4  112.29   13.20
  -7   2  -4  112.69   10.40
   7  -2   4  119.49    9.70
  -8   2  -4    5.80    5.90
  -8   2  -4   -3.90    3.10
   8  -2   4   -0.10    2.50
  -8  -1   4   21.10    6.10
   7   1  -4  107.29   11.30
  -7  -1   4  104.49   10.60
   6   1  -4    7.90    3.50
  -6  -1   4    4.10    2.60
   5   1  -4 1464.05   57.49
  -5  -1   4 1449.15   56.49
   4   1  -4  152.38   10.50
  -4  -1   4  139.79    9.60
   3   1  -4  294.27   10.10
   3   1  -4  254.87   13.90
  -3  -1   4  282.57   10.20
  -3  -1   4  286.87   13.70
   2   1  -4  689.23   24.40
   2   1  -4  666.83   26.60
  -2  -1   4  724.03   26.60
  -2  -1   4  689.93   24.40
   1   1  -4  604.64   22.70
   1   1  -4  614.04   23.20
  -1  -1   4  631.04   23.40
  -1  -1   4  627.04   22.70
   0  -1   4 9319.87  425.76
  -1   1  -4  401.26   17.40
  -1   1  -4  405.66   16.90
   1  -1   4  393.26   17.20
   1  -1   4  419.66   17.00
  -2   1  -4   73.69    6.50
  -2   1  -4   84.99    6.10
   2  -1   4   82.89    5.90
   2  -1   4   89.39    6.90
  -3   1  -4  200.98   11.20
  -3   1  -4  187.68   12.30
   3  -1   4  191.88   12.30
   3  -1   4  203.88   10.90
  -4   1  -4    4.80    3.00
  -4   1  -4    6.30    2.80
   4  -1   4    1.00    1.70
   4  -1   4    7.40    2.30
  -5   1  -4  599.84   30.50
  -5   1  -4  577.64   26.80
   5  -1   4  650.53   26.60
   5  -1   4  579.64   30.10
  -6   1  -4   62.29    8.30
  -6   1  -4   47.50    9.10
   6  -1   4   62.59    6.70
  -7   1  -4   10.70    5.50
  -7   1  -4   13.50    4.50
   7  -1   4    9.50    3.70
  -8   1  -4    2.60    5.60
  -8   1  -4   -8.20    3.50
   8  -1   4   -2.00    3.10
  -9   0   4   49.60    9.70
  -8   0   4    6.00    4.00
  -7   0   4  216.48   18.70
   6   0  -4  201.58   14.10
   6   0  -4  184.98    7.20
  -6   0   4  187.98   13.40
   5   0  -4   65.89    3.30
   5   0  -4   63.79    6.70
   5   0  -4   60.29    3.30
  -5   0   4   62.39    6.50
   4   0  -4   31.90    4.20
   4   0  -4   33.90    2.40
   4   0  -4   30.70    2.20
  -4   0   4   28.50    3.90
   3   0  -4  120.69    5.70
   3   0  -4  129.79    7.70
  -3   0   4  114.79    5.90
  -3   0   4  131.99    7.40
   2   0  -4  128.99    6.00
  -2   0   4  128.69    6.10
  -2   0   4  119.09    6.00
   1   0  -4  298.27   12.40
   1   0  -4  300.47   11.30
  -1   0   4  317.07   12.60
  -1   0   4  310.27   11.40
   0   0  -4  158.88    7.30
   0   0  -4  164.48    8.00
   0   0   4  164.28    7.30
   0   0   4  149.19    7.80
  -1   0  -4  238.48   11.40
  -1   0  -4  245.48   11.20
   1   0   4  229.28   11.20
   1   0   4  231.08   11.00
  -2   0  -4  245.68   12.70
  -2   0  -4  224.58   11.40
   2   0   4  217.68   12.30
   2   0   4  221.98   11.20
  -3   0  -4   50.69    4.90
  -3   0  -4   49.40    5.90
   3   0   4   51.29    5.80
   3   0   4   45.20    4.50
  -4   0  -4  107.59    8.00
  -4   0  -4  123.89   10.30
   4   0   4  107.09    9.50
   4   0   4  116.89    7.90
  -5   0  -4  980.60   38.70
  -5   0  -4  898.31   46.00
   5   0   4  945.41   37.70
   5   0   4  959.60   46.80
  -6   0  -4   22.80    6.20
  -6   0  -4   24.60    5.20
   6   0   4   17.10    3.70
  -7   0  -4   47.70    7.50
  -7   0  -4   28.30    8.20
   7   0   4   43.70    6.60
  -8   0  -4    0.30    4.00
  -8   0  -4   -0.20    3.70
   8   0   4   -0.10    3.60
  -9   1   4    3.20    5.10
   8  -1  -4    2.10    1.10
  -8   1   4    1.70    3.00
   7  -1  -4  390.46   15.70
   7  -1  -4  393.76   22.80
   7  -1  -4  381.46   15.40
  -7   1   4  390.36   22.40
   6  -1  -4  123.19   10.30
   6  -1  -4  121.79    6.70
   6  -1  -4  122.69    6.60
  -6   1   4  119.79   10.10
   5  -1  -4  877.61   32.10
   5  -1  -4  870.41   36.60
   5  -1  -4  876.01   32.00
  -5   1   4  879.11   36.00
   4  -1  -4   30.40    3.80
   4  -1  -4   31.00    2.90
   4  -1  -4   29.90    3.20
  -4   1   4   32.90    3.80
   3  -1  -4   -0.60    0.80
   3  -1  -4    0.60    1.10
  -3   1   4    0.70    1.00
  -3   1   4    0.10    1.30
   2  -1  -4  144.99    7.30
   2  -1  -4  148.29    6.30
  -2   1   4  137.19    7.40
  -2   1   4  149.09    6.20
   1  -1  -4 2786.62   95.59
  -1   1   4 2819.62   95.79
   0  -1  -4  518.95   20.30
   0  -1  -4  523.75   19.20
   0   1   4  496.55   20.20
   0   1   4  511.55   19.30
  -1  -1  -4  169.58    8.90
  -1  -1  -4  156.08    8.50
   1   1   4  165.88    8.70
   1   1   4  143.99    8.50
  -2  -1  -4    1.90    1.60
  -2  -1  -4    2.30    1.40
   2   1   4    4.20    1.80
   2   1   4    1.60    2.00
  -3  -1  -4   94.59    8.30
  -3  -1  -4   91.49    6.80
   3   1   4  101.79    8.50
   3   1   4   88.79    7.60
  -4  -1  -4    1.70    2.10
  -4  -1  -4    2.10    1.90
   4   1   4    1.30    1.80
   4   1   4   -0.40    1.50
  -5  -1  -4   98.19   10.70
  -5  -1  -4   93.49    7.90
   5   1   4  117.39   13.10
   5   1   4   96.79    7.60
  -6  -1  -4  150.18   11.10
  -6  -1  -4  167.88   14.70
   6   1   4  168.28   11.10
  -7  -1  -4   10.50    4.40
  -7  -1  -4   12.10    4.80
   7   1   4    9.30    3.50
  -8  -1  -4   76.59    8.60
  -8  -1  -4   72.89   15.40
   8   1   4   56.89    8.20
   9  -2  -4   47.60    5.50
   9  -2  -4   52.29    4.20
  -9   2   4   54.79   10.30
   8  -2  -4    3.30    1.60
  -8   2   4    0.80    3.60
   7  -2  -4   16.30    3.00
   7  -2  -4   17.90    3.30
   7  -2  -4   16.30    4.40
  -7   2   4   16.60    5.00
   6  -2  -4    5.90    1.90
   6  -2  -4    5.00    2.50
   6  -2  -4    5.70    2.50
  -6   2   4    3.60    2.90
   5  -2  -4  145.89    8.60
   5  -2  -4  145.59    8.60
  -5   2   4  145.19   10.00
   4  -2  -4    2.90    1.50
   4  -2  -4    0.20    1.10
   4  -2  -4   -0.60    1.20
  -4   2   4    1.00    1.20
   3  -2  -4  138.29    7.30
   3  -2  -4  134.29    7.70
  -3   2   4  131.09    8.00
   2  -2  -4 1709.73   61.09
   2  -2  -4 1755.72   59.19
   2  -2  -4 1752.52   58.89
  -2   2   4 1714.53   61.49
   1  -2  -4   20.60    1.80
   1  -2  -4   20.00    3.10
  -1   2   4   19.30    1.80
  -1   2   4   20.80    3.30
   0  -2  -4  194.78    8.80
   0  -2  -4  149.19    9.90
   0   2   4  173.88    9.00
   0   2   4  193.68    9.70
  -1  -2  -4   87.79    6.40
  -1  -2  -4  105.99    7.00
   1   2   4  103.19    6.90
   1   2   4  112.09    7.40
  -2  -2  -4  247.48   12.30
  -2  -2  -4  230.68   13.20
   2   2   4  242.08   13.70
   2   2   4  240.58   12.30
  -3  -2  -4   -1.70    0.80
  -3  -2  -4   -0.30    1.60
   3   2   4    3.10    2.50
   3   2   4    1.10    1.30
  -4  -2  -4  233.98   12.90
  -4  -2  -4  229.98   15.50
   4   2   4  223.78   12.60
   4   2   4  241.58   16.10
  -5  -2  -4    4.50    2.90
  -5  -2  -4    5.50    3.60
   5   2   4    6.90    3.70
   5   2   4    8.10    2.60
  -6  -2  -4  231.98   14.30
  -6  -2  -4  251.47   19.00
   6   2   4  244.58   14.10
  -7  -2  -4  132.29   14.80
  -7  -2  -4  126.19   10.20
   7   2   4  127.19   10.20
   9  -3  -4   99.49    8.00
  -9   3   4  123.79   13.50
   8  -3  -4  101.29    8.20
   8  -3  -4  132.79   11.20
  -8   3   4  112.19   11.60
   7  -3  -4    0.80    2.00
   7  -3  -4    0.40    1.50
   7  -3  -4    7.80    3.20
  -7   3   4    0.60    2.70
   6  -3  -4  637.24   27.00
   6  -3  -4  632.84   29.30
  -6   3   4  645.04   29.70
   5  -3  -4   89.19    6.90
   5  -3  -4   82.69    6.70
  -5   3   4   71.39    6.90
   4  -3  -4   14.80    3.20
   4  -3  -4   13.50    3.00
   4  -3  -4   14.80    3.20
   4  -3  -4   15.30    3.30
   3  -3  -4    1.70    1.40
   3  -3  -4   -0.60    1.30
   3  -3  -4    1.10    1.10
  -3   3   4    1.30    1.50
   2  -3  -4 1057.69   38.90
   2  -3  -4 1018.00   36.90
  -2   3   4  993.10   39.00
   1  -3  -4  183.48    9.90
   1  -3  -4  232.08   11.50
  -1   3   4  225.18   10.20
  -1   3   4  235.08   11.90
   0  -3  -4 1113.29   41.10
   0  -3  -4 1154.08   40.50
   0   3   4 1002.20   40.60
   0   3   4 1106.39   41.40
  -1  -3  -4  726.63   28.00
  -1  -3  -4  693.63   30.30
   1   3   4  645.74   28.80
   1   3   4  697.13   28.10
  -2  -3  -4  155.78   10.70
  -2  -3  -4  167.98    9.90
   2   3   4  160.68    9.80
  -3  -3  -4  228.18   14.80
  -3  -3  -4  240.48   13.00
   3   3   4  244.18   13.20
   3   3   4  250.47   15.90
  -4  -3  -4   85.69    7.30
  -4  -3  -4   97.89    9.60
   4   3   4   84.39   10.00
   4   3   4   74.29    6.70
  -5  -3  -4  312.67   20.50
  -5  -3  -4  304.47   16.40
   5   3   4  315.27   16.70
   5   3   4  301.67   21.20
  -6  -3  -4   15.00    4.90
  -6  -3  -4   10.90    3.70
   6   3   4   12.70    3.90
  -7  -3  -4   46.90    9.90
  -7  -3  -4   33.60    7.60
   7   3   4   42.90    8.00
   8  -4  -4  122.99    9.80
   8  -4  -4  124.99    9.60
   8  -4  -4  141.09   13.60
   7  -4  -4   -2.00    2.00
   7  -4  -4   -0.60    2.80
   7  -4  -4   -2.00    2.10
   6  -4  -4  379.46   19.10
   6  -4  -4  364.56   20.10
   6  -4  -4  393.46   19.40
   6  -4  -4  382.36   21.10
   5  -4  -4  352.56   18.20
   5  -4  -4  391.66   18.60
   5  -4  -4  353.26   18.80
   5  -4  -4  356.96   18.30
   4  -4  -4    5.80    2.40
   4  -4  -4   10.80    3.20
   4  -4  -4    8.60    2.90
   4  -4  -4    4.90    1.80
   3  -4  -4    4.60    1.80
   3  -4  -4    4.10    2.10
   3  -4  -4    2.50    1.60
  -3   4   4    8.10    2.80
   2  -4  -4    1.20    1.50
   2  -4  -4    0.70    1.60
  -2   4   4    2.00    1.60
  -2   4   4    0.50    1.40
   1  -4  -4   61.59    5.70
   1  -4  -4   95.29    7.20
  -1   4   4   91.69    7.40
  -1   4   4   84.29    6.20
   0  -4  -4    1.90    1.40
   0  -4  -4    2.30    2.00
   0   4   4    2.20    1.50
   0   4   4    3.30    1.80
  -1  -4  -4 1204.08   44.20
  -1  -4  -4 1174.18   43.10
   1   4   4 1135.39   43.50
   1   4   4  962.80   43.90
  -2  -4  -4   97.29    8.40
  -2  -4  -4  100.19    7.50
   2   4   4   77.49    8.20
   2   4   4   87.19    7.20
  -3  -4  -4  333.27   18.90
  -3  -4  -4  314.97   16.00
   3   4   4  275.77   18.70
   3   4   4  306.87   16.10
  -4  -4  -4  102.59    8.30
  -4  -4  -4   97.09   11.70
   4   4   4   96.69   11.20
   4   4   4  115.79    8.70
  -5  -4  -4    2.40    2.50
  -5  -4  -4    3.00    2.40
   5   4   4    8.00    3.10
  -6  -4  -4   18.30    5.70
  -6  -4  -4   20.60    4.50
   6   4   4   21.80    5.00
  -7  -4  -4   -0.50    3.20
  -7  -4  -4    1.20    4.50
   7   4   4   -8.60    2.90
   8  -5  -4    7.40    3.60
   8  -5  -4   10.50    3.90
   8  -5  -4   10.40    5.30
   7  -5  -4  193.38   16.60
   7  -5  -4  200.28   13.50
   7  -5  -4  198.58   18.20
   7  -5  -4  213.48   13.90
   6  -5  -4   16.20    4.90
   6  -5  -4   22.60    5.30
   6  -5  -4   17.70    4.90
   6  -5  -4   30.10    5.50
   5  -5  -4  439.96   23.00
   5  -5  -4  489.45   22.80
   5  -5  -4  496.05   23.50
   5  -5  -4  472.65   23.60
   4  -5  -4  114.99    9.30
   4  -5  -4  121.29    8.50
   4  -5  -4  115.89    9.00
   4  -5  -4   95.79    8.60
   3  -5  -4   16.80    3.50
   3  -5  -4   19.10    4.30
  -3   5   4   32.80    5.60
   2  -5  -4    2.70    2.20
   2  -5  -4    4.20    1.80
  -2   5   4    4.30    2.40
  -2   5   4    4.50    2.10
   1  -5  -4  629.94   30.00
   1  -5  -4  791.02   31.50
  -1   5   4  783.02   30.70
  -1   5   4  755.32   31.80
   0  -5  -4   36.50    4.80
   0  -5  -4   36.70    5.60
   0   5   4   35.60    5.70
   0   5   4   34.30    5.60
  -1  -5  -4   52.89    6.00
  -1  -5  -4   44.10    6.20
   1   5   4   44.80    6.40
   1   5   4   48.50    7.80
  -2  -5  -4   20.80    4.70
  -2  -5  -4   12.40    3.40
   2   5   4   19.90    4.50
   2   5   4   10.30    4.10
  -3  -5  -4  502.75   22.60
  -3  -5  -4  504.25   25.70
   3   5   4  470.95   22.80
   3   5   4  398.16   25.60
  -4  -5  -4  100.09   10.40
  -4  -5  -4  108.79    8.60
   4   5   4   74.09   10.20
   4   5   4   95.49    8.60
  -5  -5  -4   87.19    8.20
  -5  -5  -4  101.89   11.70
   5   5   4  110.99    9.50
  -6  -5  -4    1.00    2.30
  -6  -5  -4    0.80    3.80
   6   5   4    5.30    3.60
  -7  -5  -4   -1.60    3.20
   7   5   4   -5.40    3.50
   8  -6  -4   17.90    4.80
   8  -6  -4   16.70    6.20
   8  -6  -4   16.10    5.30
   7  -6  -4   33.80    7.90
   7  -6  -4   29.50    6.10
   7  -6  -4   27.20    6.20
   7  -6  -4   18.30    4.90
   6  -6  -4   83.39    8.40
   6  -6  -4   74.69    9.80
   6  -6  -4   69.59   10.90
   6  -6  -4   68.59    8.30
   5  -6  -4    0.00    2.40
   5  -6  -4    1.30    2.70
   5  -6  -4   -1.20    2.10
   4  -6  -4   82.59    7.30
   4  -6  -4   79.19    7.90
   4  -6  -4   80.79    8.50
   4  -6  -4   72.39    7.70
   3  -6  -4   -0.30    1.50
   3  -6  -4   -2.00    0.90
  -3   6   4   -1.30    1.20
  -3   6   4   -1.70    1.80
   2  -6  -4  373.96   19.80
   2  -6  -4  389.36   19.60
  -2   6   4  359.76   20.10
  -2   6   4  407.36   19.30
   1  -6  -4    9.20    3.20
   1  -6  -4   14.70    3.70
  -1   6   4   14.60    3.90
  -1   6   4   14.00    3.80
   0  -6  -4    9.90    3.30
   0  -6  -4    5.60    2.70
   0   6   4   10.30    3.40
   0   6   4   13.20    3.90
  -1  -6  -4  214.78   14.30
  -1  -6  -4  230.08   13.70
   1   6   4  203.08   13.70
   1   6   4  208.28   14.80
  -2  -6  -4  132.89   10.00
  -2  -6  -4  129.49   11.20
   2   6   4  118.39    9.80
   2   6   4  117.99   12.20
  -3  -6  -4   18.20    4.40
   3   6   4   17.20    4.60
   3   6   4   13.90    7.50
  -4  -6  -4  156.58   11.00
  -4  -6  -4  146.19   13.80
   4   6   4  127.49   17.20
   4   6   4  146.29   11.60
  -5  -6  -4   -1.10    4.00
  -5  -6  -4   -0.30    2.40
   5   6   4   -1.10    2.60
  -6  -6  -4   68.29    8.90
  -6  -6  -4   50.69   10.70
   6   6   4   52.09    8.30
   8  -7  -4   10.90    6.20
   8  -7  -4    0.10    4.40
   7  -7  -4   24.40    6.20
   7  -7  -4   14.50    5.90
   7  -7  -4   28.90    7.10
   6  -7  -4   18.90    5.10
   6  -7  -4    7.90    3.60
   6  -7  -4   12.00    5.10
   6  -7  -4   14.40    4.90
   5  -7  -4   78.49    7.80
   5  -7  -4   88.99    9.50
   5  -7  -4   84.79    9.40
   5  -7  -4   78.89   10.30
   4  -7  -4   46.50    6.00
   4  -7  -4   33.40    8.30
   4  -7  -4   46.70    8.10
   4  -7  -4   40.00    7.00
   3  -7  -4  175.98   12.90
   3  -7  -4  165.58   12.30
  -3   7   4  187.78   12.40
  -3   7   4  168.48   13.20
   2  -7  -4  924.21   39.50
   2  -7  -4  927.71   39.60
  -2   7   4  918.31   40.40
  -2   7   4  895.81   38.40
   1  -7  -4   26.70    6.10
   1  -7  -4   43.40    6.80
  -1   7   4   40.60    7.00
  -1   7   4   47.50    7.20
   0  -7  -4   15.60    4.80
   0  -7  -4   10.20    3.70
   0   7   4   11.50    4.20
   0   7   4   19.70    5.00
  -1  -7  -4  704.63   31.40
  -1  -7  -4  693.43   33.00
   1   7   4  690.03   32.30
   1   7   4  680.63   33.80
  -2  -7  -4  161.38   13.20
  -2  -7  -4  151.58   12.90
   2   7   4  145.29   13.70
   2   7   4  132.79   11.60
  -3  -7  -4  183.98   13.00
  -3  -7  -4  199.78   15.70
   3   7   4  194.38   17.50
   3   7   4  191.38   14.00
  -4  -7  -4   97.99   12.00
  -4  -7  -4   94.59    8.90
   4   7   4   69.79   10.20
  -5  -7  -4   30.00    7.60
  -5  -7  -4   27.00    5.90
   5   7   4   23.30    6.50
  -6  -7  -4   -2.70    3.80
  -6  -7  -4    9.70    5.70
   7  -8  -4    2.50    4.70
   7  -8  -4    8.70    4.70
   6  -8  -4   81.79    9.70
   6  -8  -4   77.99   10.50
   6  -8  -4   97.89   10.50
   5  -8  -4  177.28   14.10
   5  -8  -4  183.98   13.20
   5  -8  -4  174.08   14.20
   4  -8  -4    5.20    3.50
   4  -8  -4    2.50    2.50
   4  -8  -4   -3.10    2.40
   4  -8  -4   -1.60    2.60
   3  -8  -4  312.87   19.00
   3  -8  -4  274.67   18.20
   3  -8  -4  289.07   19.00
  -3   8   4  328.97   18.50
   2  -8  -4    6.10    3.80
   2  -8  -4    4.70    2.80
  -2   8   4    5.30    2.80
  -2   8   4    7.80    3.80
   1  -8  -4  350.26   19.70
   1  -8  -4  300.77   19.90
  -1   8   4  338.97   20.00
  -1   8   4  340.67   20.60
   0  -8  -4   34.20    7.50
   0  -8  -4   43.90    7.40
   0   8   4   39.80    7.60
   0   8   4   49.20    7.90
  -1  -8  -4  754.92   34.60
  -1  -8  -4  789.42   37.20
   1   8   4  766.52   37.70
   1   8   4  755.12   36.10
  -2  -8  -4    8.20    4.70
  -2  -8  -4   11.80    3.90
   2   8   4   11.70    4.40
   2   8   4    9.90    5.60
  -3  -8  -4   30.50    6.20
  -3  -8  -4   29.60    7.60
   3   8   4   33.00    6.90
  -4  -8  -4   60.99    8.70
  -4  -8  -4   61.09   10.50
  -5  -8  -4   41.40    9.30
  -5  -8  -4   43.40    7.00
   6  -9  -4  139.39   13.40
   6  -9  -4  133.29   13.30
   6  -9  -4  148.29   12.90
   5  -9  -4  223.48   17.10
   4  -9  -4   13.50    5.50
   4  -9  -4   13.30    4.40
   4  -9  -4   14.90    5.30
   3  -9  -4  307.07   19.60
   3  -9  -4  267.57   18.80
  -3   9   4  293.97   18.50
   2  -9  -4  496.15   26.30
   2  -9  -4  407.46   25.70
  -2   9   4  524.55   26.70
   1  -9  -4   74.19   10.00
   1  -9  -4  107.09   10.60
  -1   9   4   87.39   10.00
   0  -9  -4   -4.30    2.70
   0  -9  -4    6.00    4.00
   0   9   4    5.30    3.50
  -1  -9  -4   18.00    5.60
  -1  -9  -4   19.90    5.20
   1   9   4   26.30    6.80
  -2  -9  -4   58.19   10.20
  -2  -9  -4   39.90    7.00
  -3  -9  -4    0.50    4.40
  -3  -9  -4    0.50    3.50
  -4  -9  -4   18.10    8.50
  -4  -9  -4   27.10    6.40
   6 -10  -4   11.40    5.70
   6 -10  -4    3.90    4.70
   5 -10  -4   33.50    6.70
   5 -10  -4   27.50    8.80
   5 -10  -4   16.50    6.20
   4 -10  -4   72.39   11.30
   4 -10  -4   57.19    9.70
   4 -10  -4   63.59   10.90
   3 -10  -4   32.90    7.50
   3 -10  -4   23.00    7.60
  -3  10   4   21.70    7.10
   2 -10  -4  233.88   17.40
   2 -10  -4  184.68   17.10
  -2  10   4  287.97   19.30
   1 -10  -4   23.80    7.60
   1 -10  -4   22.40    6.60
  -1  10   4   29.90    7.10
   0 -10  -4   24.90    6.80
   0 -10  -4   33.50    8.40
   0  10   4   38.30    9.80
  -1 -10  -4   -0.50    3.20
  -1 -10  -4   -3.50    3.50
  -2 -10  -4   -1.00    3.10
  -2 -10  -4    0.20    3.80
  -3 -10  -4   35.90    8.00
   4 -11  -4   19.70    7.20
   4 -11  -4   18.50    6.40
   3 -11  -4   34.20    8.20
   3 -11  -4   41.10    9.90
   2 -11  -4    6.10    4.50
   2 -11  -4    7.10    4.60
   1 -11  -4   22.40    8.30
   1 -11  -4   22.40    7.50
   0 -11  -4    8.40    6.60
   0 -11  -4   -3.10    4.80
  -1 -11  -4   24.20    7.60
  -1 -11  -4   17.60    6.50
  -2 -11  -4   -5.30    3.40
   2 -12  -4   -5.80    4.90
   1 -12  -4   39.50   10.10
   0 -13   5    6.80    6.10
   1 -13   5  147.99   15.80
  -3 -12   5   40.40    8.00
  -2 -12   5   11.90    8.00
  -2 -12   5   11.80    5.80
  -1 -12   5   -7.50    4.00
  -1 -12   5   -7.50    6.00
   0 -12   5   11.10    5.30
   0 -12   5    8.30    6.00
   1 -12   5  312.47   25.30
   1 -12   5  314.57   25.50
   2 -12   5   54.19   10.60
   2 -12   5   43.80   11.90
   3 -12   5    2.00    4.50
   3 -12   5   14.00    6.00
  -4 -11   5   46.60   11.10
  -4 -11   5   50.09    7.50
  -4 -11   5   60.09    8.60
  -3 -11   5   14.80    6.00
  -3 -11   5   22.70    5.60
  -3 -11   5   25.20    9.90
  -2 -11   5   36.70    7.40
  -2 -11   5   24.80    9.50
  -1 -11   5   42.70   11.10
  -1 -11   5   43.90    7.80
   0 -11   5  236.68   17.60
   0 -11   5  231.68   21.30
   1 -11   5    6.20    5.00
   1 -11   5   -1.60    2.90
   2 -11   5   21.30    6.50
   2 -11   5   14.00    6.40
   3 -11   5  276.77   23.60
   3 -11   5  238.58   22.50
   4 -11   5   20.60    7.70
   4 -11   5   21.10    7.40
  -5 -10   5   14.10    4.30
  -5 -10   5    9.60    4.70
  -5 -10   5   10.10    6.30
  -4 -10   5   -0.20    3.30
  -4 -10   5    0.20    2.50
  -4 -10   5   -7.90    5.10
  -3 -10   5   54.29    8.10
  -3 -10   5   42.50    7.30
  -3 -10   5   36.30    9.80
  -2 -10   5  167.88   18.50
  -2 -10   5  229.48   15.40
  -2 -10   5  232.28   15.30
  -1 -10   5    4.00    5.70
  -1 -10   5    5.80    3.30
   0 -10   5   30.40    7.20
   0 -10   5   28.30    6.50
   0 -10   5   37.50    9.50
   1 -10   5    0.40    2.90
   1 -10   5    0.70    3.80
   2 -10   5   99.99   13.30
   2 -10   5  100.59   11.40
   3 -10   5  117.49   12.80
   3 -10   5  123.59   14.20
   4 -10   5  135.69   16.10
   4 -10   5  161.08   15.50
   5 -10   5   30.00    7.80
   5 -10   5   17.90    8.40
  -6  -9   5    3.60    2.90
  -6  -9   5    0.50    5.40
  -5  -9   5   31.60    5.20
  -5  -9   5   33.30    4.90
  -5  -9   5   49.60   10.70
  -4  -9   5   16.70    7.40
  -4  -9   5   17.00    4.10
  -4  -9   5   18.40    4.40
  -3  -9   5   15.40    4.30
  -3  -9   5    5.20    4.30
  -3  -9   5   19.70    4.60
   2   9  -5   88.39   15.20
  -2  -9   5   81.39    8.50
  -2  -9   5   71.69   13.50
  -2  -9   5   93.29    8.90
   1   9  -5   55.69   10.40
  -1  -9   5   54.59   10.70
  -1  -9   5   55.69    8.00
  -1  -9   5   53.19    7.70
   0   9  -5  268.57   19.50
   0  -9   5  236.58   19.30
  -1   9  -5    1.60    3.10
   1  -9   5    7.40    3.40
   1  -9   5    6.30    3.70
   1  -9   5   -5.10    3.00
  -2   9  -5   50.69    9.20
  -2   9  -5   66.19   10.20
   2  -9   5   67.39   10.10
   2  -9   5   51.99   10.40
   2  -9   5   63.19    9.30
  -3   9  -5    3.40    2.40
   3  -9   5    0.30    3.90
  -4   9  -5   -2.30    3.10
   4  -9   5    0.30    2.50
  -5   9  -5   32.20    7.60
   5  -9   5   30.80    8.30
  -6   9  -5   -3.90    4.80
   6  -9   5   -6.30    4.60
  -6  -8   5   11.00    1.90
  -6  -8   5   11.40    2.20
  -5  -8   5  108.49    7.40
  -5  -8   5  113.99    7.40
  -5  -8   5  107.09   13.60
  -4  -8   5    9.20    2.90
  -4  -8   5   11.50    3.20
  -4  -8   5    8.90    6.00
   3   8  -5   26.60    7.20
  -3  -8   5    9.50    5.00
  -3  -8   5   31.20    5.40
  -3  -8   5   21.90    4.60
   2   8  -5  341.67   22.40
  -2  -8   5  356.16   18.50
  -2  -8   5  369.06   18.40
  -2  -8   5  288.17   21.90
   1   8  -5   25.80    6.60
  -1  -8   5   27.80    7.50
  -1  -8   5   18.40    4.80
  -1  -8   5   22.50    5.00
   0   8  -5    0.00    2.00
   0  -8   5    1.00    2.30
   0  -8   5    1.70    2.20
   0  -8   5   -2.20    2.80
  -1   8  -5   36.20    7.50
  -1   8  -5   26.00    5.90
   1  -8   5   29.90    7.40
   1  -8   5   36.90    6.40
  -2   8  -5  202.88   16.10
  -2   8  -5  199.68   15.00
   2  -8   5  205.88   14.20
   2  -8   5  201.98   16.80
  -3   8  -5  143.39   12.80
   3  -8   5  131.19   12.70
   3  -8   5  135.29   11.60
   3  -8   5  127.49   13.40
  -4   8  -5  303.57   20.30
   4  -8   5  309.57   22.30
  -5   8  -5   51.59    9.70
   5  -8   5   26.90    7.60
  -6   8  -5    1.80    4.00
   6  -8   5    0.00    5.10
  -7  -7   5  105.69   13.70
  -6  -7   5    8.10    5.00
  -5  -7   5   59.59   10.80
  -5  -7   5   62.39    4.70
  -5  -7   5   62.69    4.70
   4   7  -5   22.50    6.90
  -4  -7   5   29.80    4.10
  -4  -7   5   33.80    4.70
  -4  -7   5   41.60    9.10
   3   7  -5  135.09   12.70
  -3  -7   5  120.59    9.40
  -3  -7   5  106.59   12.30
  -3  -7   5  133.39    8.90
   2   7  -5  335.37   21.30
  -2  -7   5  351.86   17.10
  -2  -7   5  307.37   21.20
  -2  -7   5  339.37   17.30
   1   7  -5  520.35   27.80
  -1  -7   5  499.45   24.30
  -1  -7   5  557.84   29.00
  -1  -7   5  514.15   23.90
   0   7  -5   -0.50    1.30
   0   7  -5    0.50    2.20
   0  -7   5    1.50    2.70
   0  -7   5    0.10    1.60
  -1   7  -5  310.67   19.60
  -1   7  -5  312.87   18.30
   1  -7   5  310.57   20.10
   1  -7   5  335.07   18.00
  -2   7  -5   -1.00    2.40
  -2   7  -5    2.80    3.10
   2  -7   5    3.20    2.70
   2  -7   5    4.00    3.50
  -3   7  -5   25.60    6.70
   3  -7   5   23.40    6.70
   3  -7   5   22.30    7.00
   3  -7   5   29.50    7.20
  -4   7  -5  588.44   30.20
   4  -7   5  570.44   28.50
   4  -7   5  566.24   30.80
   4  -7   5  579.24   32.30
  -5   7  -5   46.70    8.70
   5  -7   5   47.80    9.80
  -6   7  -5   -5.00    3.70
   6  -7   5   -1.30    4.80
  -7   7  -5  107.99   16.70
   7  -7   5   87.69   15.00
  -7  -6   5    2.00    4.80
  -6  -6   5    5.60    4.40
   5   6  -5  197.38   17.00
  -5  -6   5  198.98    8.50
  -5  -6   5  200.38   16.50
  -5  -6   5  213.18    8.70
   4   6  -5  284.07   19.80
  -4  -6   5  260.77   12.30
  -4  -6   5  307.77   19.80
  -4  -6   5  260.87   12.30
   3   6  -5   13.90    4.50
  -3  -6   5   11.10    2.80
  -3  -6   5   11.50    2.90
  -3  -6   5   10.80    4.50
   2   6  -5  105.69   10.20
  -2  -6   5   93.39   10.30
  -2  -6   5  102.99    7.70
  -2  -6   5  108.89    7.50
   1   6  -5   84.39    7.20
   1   6  -5   73.99    8.20
  -1  -6   5   91.69    9.30
  -1  -6   5   70.59    6.30
   0   6  -5   10.70    4.00
   0   6  -5   11.40    3.40
   0  -6   5   12.20    4.00
   0  -6   5    5.70    2.60
  -1   6  -5  355.56   20.40
  -1   6  -5  362.66   19.30
   1  -6   5  379.06   18.80
   1  -6   5  358.36   21.00
  -2   6  -5   -3.50    1.90
  -2   6  -5    6.60    2.90
   2  -6   5   -2.30    2.30
   2  -6   5    2.50    2.10
  -3   6  -5   20.90    5.10
   3  -6   5   18.80    5.30
   3  -6   5   29.00    6.30
   3  -6   5   24.50    4.90
  -4   6  -5  323.07   19.90
   4  -6   5  337.47   21.00
   4  -6   5  327.47   21.80
   4  -6   5  348.57   21.70
  -5   6  -5    6.30    3.10
   5  -6   5   -3.00    2.20
   5  -6   5   -5.10    2.40
  -6   6  -5   14.70    4.90
   6  -6   5   18.90    6.80
  -7   6  -5   26.80    7.60
   7  -6   5   41.30   10.10
  -8  -5   5  127.79   14.90
  -7  -5   5    4.90    4.60
   6   5  -5   95.99   13.00
  -6  -5   5   84.79   10.10
   5   5  -5   37.70    9.00
  -5  -5   5   39.70    9.50
   4   5  -5   41.80    8.10
  -4  -5   5   48.00    3.40
  -4  -5   5   46.40    3.40
  -4  -5   5   53.49    8.70
   3   5  -5  198.28   14.50
  -3  -5   5  193.18   14.50
  -3  -5   5  200.38    9.80
  -3  -5   5  212.58   10.30
   2   5  -5   39.00    4.20
   2   5  -5   51.19    6.30
  -2  -5   5   38.40    3.90
  -2  -5   5   33.70    6.60
   1   5  -5  219.38   14.20
   1   5  -5  202.98   11.70
  -1  -5   5  221.78   14.60
  -1  -5   5  217.48   11.50
   0   5  -5    6.20    2.80
   0   5  -5    3.60    1.80
   0  -5   5    2.70    2.60
  -1   5  -5   12.20    3.40
  -1   5  -5   15.30    3.90
   1  -5   5    9.70    3.50
   1  -5   5   12.60    3.20
  -2   5  -5    4.10    2.70
   2  -5   5    4.30    2.10
   2  -5   5    3.10    2.40
   2  -5   5    3.20    2.60
  -3   5  -5  171.28   12.30
   3  -5   5  176.98   11.70
   3  -5   5  180.68   13.20
   3  -5   5  173.28   13.60
  -4   5  -5   46.30    7.80
   4  -5   5   44.70    7.70
   4  -5   5   29.60    7.10
   4  -5   5   34.60    6.30
  -5   5  -5   -3.00    2.40
   5  -5   5    1.90    3.00
   5  -5   5    4.30    3.30
   5  -5   5    0.10    2.30
  -6   5  -5   75.69   11.00
   6  -5   5   68.19   11.80
  -7   5  -5    3.90    5.40
   7  -5   5   -1.60    3.30
  -8  -4   5   17.50    6.60
  -7  -4   5  158.68   14.60
   6   4  -5   42.40    9.00
  -6  -4   5   65.09   10.20
   5   4  -5  151.08   14.00
  -5  -4   5  202.28   14.40
   4   4  -5   47.10    8.20
  -4  -4   5   44.10    7.50
  -4  -4   5   40.40    2.20
   3   4  -5   60.79    7.10
  -3  -4   5   64.29    4.10
  -3  -4   5   55.09    7.20
  -3  -4   5   64.29    4.30
   2   4  -5  312.77   13.80
   2   4  -5  302.97   16.90
  -2  -4   5  302.37   13.20
  -2  -4   5  285.57   17.00
   1   4  -5  357.66   18.80
   1   4  -5  375.76   16.90
  -1  -4   5  404.76   19.70
  -1  -4   5  373.06   16.50
   0   4  -5  911.01   37.30
   0   4  -5  927.21   35.70
   0  -4   5  888.41   35.00
   0  -4   5  921.41   37.70
  -1   4  -5  649.93   31.70
  -1   4  -5  663.33   28.10
   1  -4   5  684.03   29.90
  -2   4  -5  139.89   10.00
   2  -4   5  145.49    9.70
   2  -4   5  156.38   11.00
   2  -4   5  147.89   11.20
  -3   4  -5   61.29    6.70
   3  -4   5   50.69    6.50
   3  -4   5   57.19    7.30
   3  -4   5   66.39    6.30
  -4   4  -5  804.02   34.80
   4  -4   5  742.23   33.10
   4  -4   5  785.02   36.20
   4  -4   5  789.92   37.30
  -5   4  -5  108.79   10.10
   5  -4   5  116.79   12.40
   5  -4   5  105.79   10.90
   5  -4   5  118.59    9.70
  -6   4  -5  248.48   16.90
   6  -4   5  234.78   15.00
   6  -4   5  229.98   18.90
  -7   4  -5   88.59   10.20
   7  -4   5   75.19   13.80
  -8  -3   5    9.80    4.50
  -7  -3   5    0.60    3.00
   6   3  -5  470.95   28.80
  -6  -3   5  609.74   29.10
   5   3  -5   12.10    4.40
  -5  -3   5   19.00    4.70
   4   3  -5   36.70    6.70
  -4  -3   5   37.70    6.20
   3   3  -5  352.46   13.80
   3   3  -5  354.46   18.70
  -3  -3   5  376.36   18.90
  -3  -3   5  347.47   13.40
   2   3  -5 3085.59  109.89
   2   3  -5 3094.09  106.09
  -2  -3   5 3182.28  105.79
   1   3  -5 1004.00   39.20
   1   3  -5 1011.80   37.20
  -1  -3   5 1039.10   39.70
  -1  -3   5  973.90   36.70
   0   3  -5   -0.80    1.20
   0  -3   5   -0.90    0.90
   0  -3   5    0.00    1.00
  -1   3  -5    0.30    1.80
   1  -3   5   -0.40    1.00
   1  -3   5    0.30    1.30
   1  -3   5    0.80    1.90
  -2   3  -5  164.38   10.30
   2  -3   5  147.99   10.50
   2  -3   5  171.78   11.60
   2  -3   5  168.98   10.00
  -3   3  -5  973.60   39.60
   3  -3   5  994.00   39.00
   3  -3   5  988.00   42.00
   3  -3   5  967.40   41.00
  -4   3  -5   64.59    6.90
  -4   3  -5   41.10    7.40
   4  -3   5   56.89    6.00
   4  -3   5   41.40    7.00
  -5   3  -5  728.93   35.70
  -5   3  -5  739.83   33.00
   5  -3   5  730.33   31.70
   5  -3   5  692.53   35.00
  -6   3  -5  259.57   16.50
  -6   3  -5  237.78   18.50
   6  -3   5  239.78   15.00
  -7   3  -5   39.10    7.50
  -7   3  -5   27.50    8.10
  -8   3  -5   87.59   12.20
  -9  -2   5   -2.40    3.80
  -8  -2   5   20.50    5.60
   7   2  -5   -2.40    2.80
  -7  -2   5    1.80    2.70
   6   2  -5   45.50    8.60
  -6  -2   5   48.60    8.00
   5   2  -5   19.90    5.50
  -5  -2   5   17.10    4.30
   4   2  -5  581.44   29.90
  -4  -2   5  812.02   30.90
   3   2  -5  728.73   30.60
   3   2  -5  732.13   25.60
  -3  -2   5  743.43   25.40
  -3  -2   5  707.43   30.10
   2   2  -5  532.35   22.00
   2   2  -5  533.05   19.40
  -2  -2   5  436.96   21.40
  -2  -2   5  539.35   19.30
   1   2  -5 5255.27  176.98
  -1  -2   5 5309.77  178.58
  -1  -2   5 5233.48  176.78
   0   2  -5 2123.99   74.29
   0   2  -5 2157.68   75.09
   0  -2   5 2112.69   74.09
   0  -2   5 2117.19   75.29
  -1   2  -5 3167.68  106.29
   1  -2   5 3097.39  105.89
   1  -2   5 2962.20  106.49
   1  -2   5 3032.80  107.59
  -2   2  -5   13.80    3.70
  -2   2  -5   10.90    3.10
   2  -2   5   12.00    3.30
  -3   2  -5    7.20    2.70
  -3   2  -5    5.60    2.40
   3  -2   5    9.60    3.30
   3  -2   5    8.00    2.40
  -4   2  -5  449.06   21.50
  -4   2  -5  425.76   23.20
   4  -2   5  408.36   22.80
   4  -2   5  454.85   20.90
  -5   2  -5  180.38   14.40
  -5   2  -5  174.78   12.50
   5  -2   5  163.48   13.60
   5  -2   5  158.78   11.00
  -6   2  -5  385.36   24.40
   6  -2   5  379.56   22.30
  -7   2  -5    6.20    5.70
  -7   2  -5    5.50    4.20
   7  -2   5    5.80    2.80
  -8   2  -5    0.80    3.40
  -9  -1   5   -3.50    5.10
  -8  -1   5   63.79   10.70
   7   1  -5   -1.70    3.70
  -7  -1   5    0.50    2.90
   6   1  -5   62.79    8.00
  -6  -1   5   50.29    6.90
   5   1  -5  273.27   16.50
  -5  -1   5  283.37   15.80
   4   1  -5  217.18    7.60
   4   1  -5  193.08   12.50
   4   1  -5  225.68    7.70
  -4  -1   5  228.08   12.40
   3   1  -5  144.49    6.30
   3   1  -5  145.29    9.20
  -3  -1   5  144.89    8.50
  -3  -1   5  142.49    6.40
   2   1  -5  695.43   25.20
   2   1  -5  707.23   26.60
  -2  -1   5  718.33   25.30
  -2  -1   5  646.34   26.30
   1   1  -5   67.99    4.40
   1   1  -5   62.29    4.30
  -1  -1   5   62.09    4.50
  -1  -1   5   65.59    4.40
   0   1  -5 1865.01   64.69
   0  -1   5 1771.22   64.39
   0  -1   5 1899.61   64.79
   0  -1   5 1836.62   64.29
  -1   1  -5  878.41   34.10
  -1   1  -5  905.61   33.90
   1  -1   5  900.41   33.70
   1  -1   5  865.61   34.00
  -2   1  -5  390.66   18.80
  -2   1  -5  397.36   17.80
   2  -1   5  385.66   17.50
   2  -1   5  380.06   18.50
  -3   1  -5  378.16   19.60
  -3   1  -5  391.06   18.20
   3  -1   5  349.37   19.00
   3  -1   5  368.16   17.50
  -4   1  -5  124.69    9.40
  -4   1  -5  132.69   11.30
   4  -1   5  140.19   11.30
   4  -1   5  133.89    9.20
  -5   1  -5  359.16   18.50
  -5   1  -5  310.07   20.30
   5  -1   5  314.77   17.00
   5  -1   5  326.27   20.40
  -6   1  -5   58.89    8.10
  -6   1  -5   34.10    7.90
   6  -1   5   40.20    6.10
  -7   1  -5  127.39   14.10
  -7   1  -5   89.49    9.90
   7  -1   5  101.29    9.40
  -8   1  -5   -4.30    4.10
  -9   0   5   52.69   10.20
  -8   0   5    7.20    4.40
   7   0  -5  107.19   10.70
  -7   0   5  105.19   10.30
   6   0  -5  355.46   19.70
  -6   0   5  317.77   18.50
   5   0  -5  215.38    8.60
   5   0  -5  194.18   14.50
   5   0  -5  214.68    8.40
  -5   0   5  207.38   12.70
   4   0  -5   56.99    5.50
   4   0  -5   56.89    3.40
  -4   0   5   53.39    5.10
   3   0  -5    9.90    2.60
   3   0  -5   10.70    1.80
  -3   0   5    9.60    1.90
  -3   0   5    7.60    2.00
   2   0  -5   13.70    2.20
   2   0  -5   17.90    2.00
  -2   0   5   13.40    1.70
  -2   0   5   14.60    2.40
   1   0  -5 2729.53   90.99
  -1   0   5 2595.44   90.79
  -1   0   5 2630.44   88.89
  -1   0   5 2658.03   89.19
   0   0  -5 2169.58   75.39
   0   0  -5 2269.17   76.59
   0   0   5 2245.88   75.39
   0   0   5 2108.59   76.29
  -1   0  -5 1408.96   51.89
  -1   0  -5 1451.85   51.99
   1   0   5 1405.16   51.89
   1   0   5 1475.35   51.99
  -2   0  -5    2.70    2.20
  -2   0  -5   -0.10    1.30
   2   0   5    2.70    1.50
   2   0   5    1.40    1.50
  -3   0  -5  425.26   20.90
  -3   0  -5  391.36   18.70
   3   0   5  403.36   18.60
   3   0   5  388.66   20.40
  -4   0  -5    6.40    3.60
  -4   0  -5   15.30    3.70
   4   0   5   10.50    3.10
   4   0   5   14.70    4.20
  -5   0  -5    8.40    3.40
  -5   0  -5   14.50    5.20
   5   0   5   13.90    3.50
   5   0   5   14.70    5.30
  -6   0  -5  170.38   12.10
  -6   0  -5  148.89   14.50
   6   0   5  154.08   11.00
  -7   0  -5   53.29    8.20
  -7   0  -5   45.90    9.60
   7   0   5   53.09    7.40
  -8   0  -5  128.99   11.80
  -9   1   5   14.60    6.40
   8  -1  -5   71.79    9.30
  -8   1   5   79.59    9.50
   7  -1  -5    8.20    1.90
   7  -1  -5   10.40    2.00
   7  -1  -5   11.20    4.30
  -7   1   5   16.80    4.90
   6  -1  -5    0.90    1.10
   6  -1  -5    1.70    1.80
   6  -1  -5    0.60    1.30
  -6   1   5    0.00    1.60
   5  -1  -5  247.08   13.60
   5  -1  -5  221.28   10.70
   5  -1  -5  222.68   10.30
  -5   1   5  231.48   13.10
   4  -1  -5   81.89    5.10
   4  -1  -5   78.89    6.10
  -4   1   5   87.19    6.20
  -4   1   5   78.79    5.50
   3  -1  -5 1774.82   61.59
   3  -1  -5 1825.12   61.89
  -3   1   5 1706.93   62.19
  -3   1   5 1786.22   61.29
   2  -1  -5  658.83   24.60
  -2   1   5  622.34   24.70
   1  -1  -5   46.70    4.10
  -1   1   5   50.49    4.20
   0  -1  -5  718.03   26.50
   0  -1  -5  700.43   28.10
   0   1   5  724.43   26.60
   0   1   5  737.03   28.10
  -1  -1  -5    8.00    2.30
  -1  -1  -5    8.10    2.40
   1   1   5   13.80    2.80
   1   1   5    8.10    2.30
  -2  -1  -5    0.80    1.40
  -2  -1  -5    1.50    1.60
   2   1   5   -1.00    1.10
   2   1   5   -0.50    0.80
  -3  -1  -5  152.28    9.70
  -3  -1  -5  151.58   11.00
   3   1   5  141.89   10.70
   3   1   5  142.59    9.30
  -4  -1  -5   95.79    7.90
  -4  -1  -5  105.09    9.90
   4   1   5  101.99    9.80
   4   1   5   92.89    7.60
  -5  -1  -5  384.86   20.00
  -5  -1  -5  428.06   24.30
   5   1   5  399.56   24.10
   5   1   5  391.86   19.70
  -6  -1  -5   -5.30    2.20
  -6  -1  -5   -1.10    3.20
   6   1   5    2.20    2.30
   7   1   5  462.05   23.30
   9  -2  -5   16.90    2.30
   9  -2  -5   17.40    2.30
  -9   2   5   17.40    7.00
   8  -2  -5   36.60    7.30
   8  -2  -5   22.80    3.30
  -8   2   5   23.90    6.50
   7  -2  -5   37.90    6.60
   7  -2  -5   34.30    4.50
  -7   2   5   40.20    7.40
   6  -2  -5  105.49    7.20
   6  -2  -5  111.49    8.00
   6  -2  -5  104.09    8.90
  -6   2   5  104.79    9.00
   5  -2  -5   86.99    6.20
   5  -2  -5   77.69    6.70
  -5   2   5   78.39    6.80
   4  -2  -5   48.30    4.40
  -4   2   5   49.10    4.70
  -4   2   5   50.59    4.60
   3  -2  -5    1.40    1.00
   3  -2  -5    0.20    0.80
  -3   2   5   -1.20    0.90
   2  -2  -5   19.10    1.20
   2  -2  -5   19.20    3.80
   2  -2  -5   19.50    1.40
  -2   2   5   13.10    2.90
   1  -2  -5  528.95   18.50
   1  -2  -5  536.65   21.60
  -1   2   5  492.85   19.30
  -1   2   5  527.55   21.80
   0  -2  -5   51.49    4.80
   0  -2  -5   45.30    3.70
   0   2   5   45.60    4.60
   0   2   5   44.50    4.10
  -1  -2  -5   62.59    5.50
  -1  -2  -5   70.09    5.80
   1   2   5   69.69    5.90
   1   2   5   57.79    5.50
  -2  -2  -5  940.11   36.40
  -2  -2  -5  918.81   37.50
   2   2   5  928.41   37.90
   2   2   5  926.71   36.40
  -3  -2  -5   31.30    4.90
  -3  -2  -5   28.50    5.60
   3   2   5   28.20    4.50
   3   2   5   24.10    5.20
  -4  -2  -5    4.60    2.70
   4   2   5    4.70    3.30
   4   2   5    2.40    2.40
  -5  -2  -5   -1.10    1.80
  -5  -2  -5   -1.10    1.50
   5   2   5   -3.50    3.40
   5   2   5   -2.70    1.70
  -6  -2  -5   57.59    6.60
  -6  -2  -5   56.79   10.50
   6   2   5   44.60    6.90
  -7  -2  -5    0.60    3.50
  -7  -2  -5   -3.10    3.30
   7   2   5   -4.60    2.40
   9  -3  -5   42.40    5.00
  -9   3   5   41.70    9.70
   8  -3  -5   24.50    4.20
   8  -3  -5   35.40    6.70
   8  -3  -5   38.00    7.00
  -8   3   5   33.30    7.10
   7  -3  -5   97.59    7.50
   7  -3  -5   83.99    9.30
   7  -3  -5   91.59    7.10
  -7   3   5   89.69    9.20
   6  -3  -5   14.60    3.60
   6  -3  -5   16.40    3.50
   6  -3  -5   12.00    3.70
  -6   3   5    8.90    3.40
   5  -3  -5  388.86   18.80
   5  -3  -5  363.36   17.90
   5  -3  -5  364.96   17.50
   5  -3  -5  389.66   20.20
   4  -3  -5   91.89    7.10
   4  -3  -5   99.39    6.90
   4  -3  -5   94.69    6.40
  -4   3   5   94.09    7.50
   3  -3  -5  131.59    7.20
   3  -3  -5  141.69    8.70
   3  -3  -5  133.09    6.90
  -3   3   5  127.59    8.80
   2  -3  -5   71.79    6.00
   2  -3  -5   80.69    4.30
   2  -3  -5   75.99    4.60
  -2   3   5   78.99    6.60
   1  -3  -5 1247.98   47.10
   1  -3  -5 1318.47   44.70
  -1   3   5 1256.27   44.80
  -1   3   5 1221.98   47.40
   0  -3  -5  345.57   16.00
   0  -3  -5  354.16   15.00
   0   3   5  317.67   16.10
   0   3   5  295.07   15.20
  -1  -3  -5  192.08   11.00
  -1  -3  -5  172.68   10.60
   1   3   5  174.28   11.40
   1   3   5  200.18   11.30
  -2  -3  -5  543.05   23.80
  -2  -3  -5  534.95   24.90
   2   3   5  534.95   23.90
   2   3   5  548.75   25.80
  -3  -3  -5   58.09    5.90
  -3  -3  -5   50.69    6.50
   3   3   5   58.79    6.00
   3   3   5   60.79    7.40
  -4  -3  -5   46.60    6.50
  -4  -3  -5   45.10    7.90
   4   3   5   49.40    6.90
   4   3   5   54.69    9.40
  -5  -3  -5   34.90    7.20
  -5  -3  -5   28.70    5.60
   5   3   5   28.10    5.40
  -6  -3  -5   77.29    8.00
  -6  -3  -5   64.09   11.60
   6   3   5   70.29   10.00
  -7  -3  -5    1.90    3.70
  -7  -3  -5    1.40    4.30
   7   3   5   -6.30    3.40
   8  -4  -5    6.00    4.20
   8  -4  -5    7.30    2.90
   8  -4  -5    3.70    3.00
   8  -4  -5   12.20    4.50
   7  -4  -5   11.80    3.80
   7  -4  -5    5.90    3.00
   7  -4  -5   11.60    4.50
   7  -4  -5   12.50    3.80
   6  -4  -5   -2.20    1.60
   6  -4  -5   -1.70    1.90
   6  -4  -5    0.20    2.40
   6  -4  -5    5.40    2.50
   5  -4  -5   92.09    7.80
   5  -4  -5   91.69    7.50
   5  -4  -5   94.79    8.10
   5  -4  -5  115.29    8.80
   4  -4  -5    0.60    1.20
   4  -4  -5    4.30    2.30
   4  -4  -5   -0.20    1.50
  -4   4   5   -0.80    1.10
   3  -4  -5  246.88   11.50
   3  -4  -5  238.98   13.30
   3  -4  -5  238.88   11.90
  -3   4   5  239.48   13.80
   2  -4  -5  101.79    7.70
   2  -4  -5   99.09    6.40
  -2   4   5   92.59    7.80
  -2   4   5  106.69    6.40
   1  -4  -5   13.90    3.40
  -1   4   5   14.90    3.20
  -1   4   5   16.00    3.60
   0  -4  -5  761.52   31.90
   0  -4  -5  807.32   31.30
   0   4   5  765.42   32.50
   0   4   5  793.92   32.10
  -1  -4  -5  131.79    9.10
  -1  -4  -5  136.49    9.30
   1   4   5  105.99    9.30
   1   4   5  136.49    9.60
  -2  -4  -5  480.95   22.40
  -2  -4  -5  518.65   24.20
   2   4   5  506.75   23.10
   2   4   5  449.36   24.60
  -3  -4  -5  120.69   10.60
  -3  -4  -5  109.69    8.80
   3   4   5  118.49   12.10
   3   4   5  120.59    9.30
  -4  -4  -5  185.78   12.60
  -4  -4  -5  229.48   16.20
   4   4   5  203.28   13.40
   4   4   5  225.48   17.20
  -5  -4  -5   66.29    8.60
  -5  -4  -5   58.09   10.20
   5   4   5   59.99    8.20
  -6  -4  -5   26.50    7.80
  -6  -4  -5   31.30    5.70
   6   4   5   26.40    5.50
  -7  -4  -5    9.70    4.60
  -7  -4  -5    7.20    4.40
   8  -5  -5  170.68   14.60
   8  -5  -5  164.98   12.00
   8  -5  -5  158.08   11.90
   8  -5  -5  153.08   13.30
   7  -5  -5    9.70    4.00
   7  -5  -5    1.90    2.70
   7  -5  -5    4.10    4.00
   7  -5  -5    5.50    3.40
   6  -5  -5   43.90    7.00
   6  -5  -5   34.00    5.90
   6  -5  -5   43.00    6.70
   6  -5  -5   39.70    7.00
   5  -5  -5  128.69    9.90
   5  -5  -5  119.29    9.10
   5  -5  -5  111.39    9.60
   5  -5  -5  123.79    9.70
   4  -5  -5   25.10    4.50
   4  -5  -5   25.10    5.10
   4  -5  -5   19.80    3.70
  -4   5   5   22.60    4.90
   3  -5  -5  859.21   33.70
   3  -5  -5  874.51   36.50
   3  -5  -5  881.81   34.80
  -3   5   5  905.81   37.50
   2  -5  -5  324.97   15.90
   2  -5  -5  325.37   17.20
  -2   5   5  332.17   15.50
  -2   5   5  323.87   17.70
   1  -5  -5  283.57   15.20
   1  -5  -5  246.18   13.80
  -1   5   5  274.97   15.70
  -1   5   5  275.57   14.20
   0  -5  -5    4.60    2.30
   0  -5  -5   10.30    3.10
   0   5   5   10.10    3.60
   0   5   5    5.30    2.40
  -1  -5  -5  118.69    9.00
  -1  -5  -5  109.49    9.00
   1   5   5  104.59    9.80
   1   5   5   97.89    8.60
  -2  -5  -5  120.79    9.40
  -2  -5  -5  137.59   10.80
   2   5   5   91.99   10.00
   2   5   5  127.89   10.00
  -3  -5  -5   -0.90    2.00
  -3  -5  -5    1.90    2.00
   3   5   5   -0.80    3.60
   3   5   5    0.30    2.00
  -4  -5  -5   25.50    6.60
  -4  -5  -5   23.20    5.30
   4   5   5   23.20    6.60
   4   5   5   23.20    4.80
  -5  -5  -5  305.27   17.20
  -5  -5  -5  289.27   20.80
   5   5   5  270.87   16.90
  -6  -5  -5    5.60    3.90
  -6  -5  -5    6.10    6.20
   6   5   5   -0.30    2.90
   8  -6  -5    0.00    4.50
   8  -6  -5    4.20    4.60
   8  -6  -5    5.00    4.20
   7  -6  -5    8.20    3.70
   7  -6  -5    4.80    3.70
   7  -6  -5    4.80    3.10
   7  -6  -5    8.70    4.40
   6  -6  -5   62.49    8.10
   6  -6  -5   78.69    7.70
   6  -6  -5   89.69   12.40
   5  -6  -5   33.60    6.40
   5  -6  -5   23.60    5.50
   5  -6  -5   30.50    5.10
   5  -6  -5   15.90    4.30
   4  -6  -5  357.66   19.50
   4  -6  -5  365.16   18.60
   4  -6  -5  358.66   17.50
   4  -6  -5  330.77   19.60
  -4   6   5  326.47   19.60
   3  -6  -5   37.10    6.00
   3  -6  -5   49.99    7.30
  -3   6   5   38.00    6.80
  -3   6   5   41.70    4.90
   2  -6  -5    3.70    2.60
   2  -6  -5    2.70    2.80
  -2   6   5    4.80    2.50
  -2   6   5   -0.20    2.20
   1  -6  -5   62.29    6.70
   1  -6  -5   72.59    7.40
  -1   6   5   82.09    7.40
  -1   6   5   73.19    7.70
   0  -6  -5   69.39    7.00
   0  -6  -5   66.49    6.90
   0   6   5   59.29    6.90
   0   6   5   64.59    7.40
  -1  -6  -5    2.20    2.40
  -1  -6  -5    4.60    3.30
   1   6   5    2.40    2.90
   1   6   5    3.40    2.70
  -2  -6  -5  615.74   27.70
  -2  -6  -5  615.24   29.50
   2   6   5  573.54   28.20
   2   6   5  547.95   30.40
  -3  -6  -5   12.30    3.90
  -3  -6  -5   13.70    5.50
   3   6   5   23.90    8.10
  -4  -6  -5    4.40    2.80
  -4  -6  -5    0.30    3.00
   4   6   5    8.70    3.80
  -5  -6  -5   17.40    6.60
  -5  -6  -5   17.10    4.60
   5   6   5   11.10    5.10
  -6  -6  -5  228.88   19.90
   7  -7  -5   -0.60    3.60
   7  -7  -5    2.20    3.40
   7  -7  -5   -3.80    3.10
   6  -7  -5  139.89   12.00
   6  -7  -5  136.99   10.70
   6  -7  -5  123.09   11.90
   6  -7  -5  135.29   12.00
   5  -7  -5   68.89    8.30
   5  -7  -5   73.09    7.30
   5  -7  -5   79.39    9.20
   5  -7  -5   89.09    9.30
   4  -7  -5  599.74   27.50
   4  -7  -5  589.54   30.40
   4  -7  -5  628.24   29.00
   4  -7  -5  653.73   30.40
   3  -7  -5    0.60    2.60
   3  -7  -5    2.30    2.50
  -3   7   5    0.80    2.30
  -3   7   5   -0.10    2.00
   2  -7  -5   14.30    4.60
   2  -7  -5   28.80    7.10
  -2   7   5   22.40    4.50
   1  -7  -5  192.88   13.90
  -1   7   5  249.68   15.20
   0  -7  -5   15.50    4.10
   0  -7  -5   15.70    4.30
   0   7   5    6.50    4.00
   0   7   5   10.60    4.10
  -1  -7  -5  522.85   25.40
  -1  -7  -5  510.35   26.20
   1   7   5  511.25   27.40
   1   7   5  473.35   25.80
  -2  -7  -5  124.79   10.70
  -2  -7  -5  126.39   11.70
   2   7   5  126.09   13.30
   2   7   5  118.89   11.10
  -3  -7  -5  104.09    9.50
  -3  -7  -5   94.69   10.60
   3   7   5   78.89    9.00
   3   7   5   81.49   13.10
  -4  -7  -5  130.19   13.50
  -4  -7  -5  157.28   12.20
  -5  -7  -5    2.50    3.10
   7  -8  -5   -0.50    3.40
   7  -8  -5    5.50    4.80
   7  -8  -5   -2.20    3.10
   6  -8  -5   34.60    7.50
   6  -8  -5   45.80    8.00
   6  -8  -5   39.80    7.40
   5  -8  -5   78.09    9.00
   5  -8  -5   62.39    7.20
   5  -8  -5   54.49    8.80
   4  -8  -5   29.50    6.30
   4  -8  -5   29.20    6.50
   4  -8  -5   22.90    5.10
   3  -8  -5  486.95   25.00
   3  -8  -5  463.65   25.20
  -3   8   5  486.55   23.90
  -3   8   5  423.56   28.50
   2  -8  -5  162.28   12.80
   2  -8  -5  115.09   11.00
  -2   8   5  155.98   13.10
  -2   8   5  142.59   11.30
   1  -8  -5  155.58   13.00
   1  -8  -5  169.88   13.10
  -1   8   5  195.38   14.70
  -1   8   5  185.68   13.50
   0  -8  -5    7.00    3.10
   0  -8  -5    3.10    2.90
   0   8   5    3.80    3.70
   0   8   5    6.80    4.00
  -1  -8  -5   31.80    6.80
  -1  -8  -5   34.70    7.10
   1   8   5   36.00    8.20
   1   8   5   32.80    7.90
  -2  -8  -5   85.69    9.20
  -2  -8  -5   90.49   10.50
   2   8   5   98.79   12.30
  -3  -8  -5    9.80    4.70
  -3  -8  -5    5.40    3.40
  -4  -8  -5    4.10    4.70
  -4  -8  -5    3.20    4.20
   6  -9  -5    7.10    4.30
   6  -9  -5   14.00    5.30
   6  -9  -5    0.10    4.60
   5  -9  -5   11.70    4.80
   5  -9  -5   12.70    4.50
   5  -9  -5    9.20    4.30
   4  -9  -5    3.90    3.30
   4  -9  -5    6.80    3.80
   4  -9  -5   -1.60    2.50
   3  -9  -5   28.70    7.00
   3  -9  -5   54.69    9.10
  -3   9   5   41.80    7.20
   2  -9  -5   18.80    6.20
   2  -9  -5   24.20    6.20
  -2   9   5   13.40    5.10
   1  -9  -5   18.40    5.00
   1  -9  -5   19.50    5.40
  -1   9   5   17.90    6.30
   0  -9  -5    6.70    3.70
   0  -9  -5    4.90    3.50
   0   9   5   13.70    5.40
  -1  -9  -5   43.10    8.80
  -1  -9  -5   27.60    6.40
   1   9   5   45.10    9.30
  -2  -9  -5    5.00    4.20
  -2  -9  -5   10.30    4.80
  -3  -9  -5   88.59   11.60
  -3  -9  -5   72.19   10.30
  -4  -9  -5   85.29    9.80
  -4  -9  -5   69.49   12.10
   5 -10  -5   29.20    6.40
   5 -10  -5   21.60    6.40
   4 -10  -5    9.90    8.20
   4 -10  -5    3.40    4.70
   3 -10  -5   13.60    6.80
   3 -10  -5   24.90    6.70
  -3  10   5   16.40    6.60
   2 -10  -5   20.50    6.00
   1 -10  -5   -1.40    3.90
   1 -10  -5    0.70    3.20
   0 -10  -5   40.30    7.70
   0 -10  -5   27.60    7.00
   0  10   5   32.80    8.80
  -1 -10  -5   19.00    6.00
  -1 -10  -5   40.70    8.70
  -2 -10  -5    1.20    4.00
  -2 -10  -5   -2.30    4.30
  -3 -10  -5   13.00    5.10
  -3 -10  -5    7.80    5.30
   4 -11  -5   84.99   12.60
   4 -11  -5   83.99   13.60
   4 -11  -5   83.99   13.50
   3 -11  -5   22.10    7.20
   3 -11  -5   31.30    7.10
  -3  11   5   22.20    8.10
   2 -11  -5   38.20    9.50
   2 -11  -5   68.79   11.30
  -2  11   5   48.90   10.10
   1 -11  -5   36.70    8.10
   1 -11  -5   47.30    9.30
   0 -11  -5   -1.10    4.40
   0 -11  -5    4.30    4.60
  -1 -11  -5    2.50    4.70
  -1 -11  -5   -0.60    4.40
  -3 -12   6   53.79    9.00
  -2 -12   6   -0.90    4.70
  -2 -12   6    4.10    6.80
  -1 -12   6    4.90    6.90
  -1 -12   6   17.90    5.80
   0 -12   6    9.70    6.40
   0 -12   6   19.20    5.90
   1 -12   6   -4.90    3.50
   2 -12   6   51.29    9.90
   2 -12   6   24.90    9.80
   3 -12   6   17.30    9.30
   3 -12   6   31.30    9.10
  -4 -11   6   25.40    5.90
  -4 -11   6   18.60    5.80
  -4 -11   6   30.40   11.20
  -3 -11   6   14.30    8.70
  -3 -11   6   28.60    6.50
  -3 -11   6   20.60    5.60
  -2 -11   6    7.00    4.00
  -2 -11   6   -3.00    5.20
  -1 -11   6    2.60    3.50
  -1 -11   6   -0.20    4.10
   0 -11   6   54.69   12.10
   0 -11   6   42.80    8.80
   1 -11   6   59.19   10.50
   1 -11   6   61.49   11.70
   2 -11   6   54.39   10.20
   2 -11   6   56.59   12.10
   3 -11   6   18.10    6.30
   3 -11   6   12.50    6.90
   4 -11   6    3.00    5.40
   4 -11   6   -4.10    6.20
  -5 -10   6    0.60    3.60
  -5 -10   6   -2.60    4.30
  -5 -10   6   -1.20    2.80
  -4 -10   6   47.80    7.00
  -4 -10   6   62.59    7.20
  -3 -10   6  128.09   10.60
  -3 -10   6  130.09   10.90
  -3 -10   6   86.69   14.60
  -2 -10   6  153.18   17.50
  -2 -10   6  178.78   13.00
  -2 -10   6  166.78   13.00
  -1 -10   6    5.40    3.80
  -1 -10   6   -1.30    2.70
  -1 -10   6    2.10    4.90
   0 -10   6   61.99   12.20
   0 -10   6   77.49   10.80
   0 -10   6   52.19    8.40
   1 -10   6   -6.50    2.70
   1 -10   6   -6.40    3.20
   2 -10   6   86.49   12.50
   2 -10   6   82.49   13.90
  -3  10  -6   23.00    6.80
   3 -10   6   31.50    8.10
   3 -10   6   20.00    7.10
   4 -10   6    0.90    5.30
  -5  10  -6   -8.00    5.00
   5 -10   6  -10.10    5.10
  -6  -9   6   24.60    3.40
  -6  -9   6   31.60    9.60
  -6  -9   6   26.80    3.80
  -5  -9   6    7.00    2.80
  -5  -9   6    6.70    5.10
  -5  -9   6    3.70    2.30
  -4  -9   6    3.20    5.40
  -4  -9   6   -0.30    2.30
  -4  -9   6    2.10    2.30
  -3  -9   6   48.30    7.30
  -3  -9   6   56.29    7.60
  -3  -9   6   33.70    9.10
  -2  -9   6  318.17   25.00
  -2  -9   6  390.96   20.30
  -2  -9   6  390.36   20.70
   1   9  -6   39.70    8.70
  -1  -9   6   28.30    5.70
  -1  -9   6   19.10    6.40
  -1  -9   6   37.60    7.00
   0   9  -6  174.48   15.20
   0  -9   6  160.18   15.90
   0  -9   6  187.38   13.90
   0  -9   6  158.38   12.50
  -1   9  -6   58.79   10.00
  -1   9  -6   57.59    9.40
   1  -9   6   47.40    9.90
   1  -9   6   51.99    8.30
  -2   9  -6   50.29    9.10
   2  -9   6   47.60    9.80
  -3   9  -6   16.00    5.90
   3  -9   6   21.70    6.60
  -4   9  -6    4.80    4.00
   4  -9   6    0.90    3.80
   5  -9   6   24.60   10.20
  -6   9  -6   43.70   10.30
   6  -9   6   28.80    9.90
  -5  -8   6   51.69    5.40
  -5  -8   6   56.09   11.40
  -5  -8   6   49.60    4.80
  -4  -8   6   13.90    3.00
  -4  -8   6   12.60    6.50
  -4  -8   6   11.00    3.10
   3   8  -6   76.99   12.40
  -3  -8   6   80.69    7.20
  -3  -8   6   73.89    7.10
  -3  -8   6   68.69   12.30
   2   8  -6  319.17   21.80
  -2  -8   6  332.97   17.40
  -2  -8   6  291.97   22.00
  -2  -8   6  322.57   17.80
  -1  -8   6   13.00    3.60
  -1  -8   6   10.30    4.20
   0   8  -6   94.09    9.60
   0   8  -6  106.69   12.90
   0  -8   6  118.29    9.90
  -1   8  -6  317.27   21.70
  -1   8  -6  349.17   23.40
   1  -8   6  316.47   19.20
   1  -8   6  376.06   23.50
  -2   8  -6  160.38   13.30
  -2   8  -6  145.59   13.90
   2  -8   6  137.89   11.60
   2  -8   6  134.79   13.70
  -3   8  -6   39.90    8.00
   3  -8   6   37.00    8.60
   3  -8   6   48.80   10.50
  -4   8  -6   16.60    5.20
   4  -8   6   20.10    6.00
  -5   8  -6   23.20    6.50
   5  -8   6    6.60    5.00
   6  -8   6   63.29   12.30
  -7  -7   6    9.40    5.60
  -6  -7   6   36.50    9.70
  -5  -7   6   10.50    2.30
  -5  -7   6   15.10    2.50
  -5  -7   6   10.20    4.70
   4   7  -6   88.69   11.20
  -4  -7   6   78.69    6.20
  -4  -7   6   73.39   12.20
  -4  -7   6   83.29    6.20
   3   7  -6    0.30    2.80
  -3  -7   6    4.90    4.00
  -3  -7   6    0.90    2.20
   2   7  -6  174.38   14.10
  -2  -7   6  170.48   15.10
  -2  -7   6  171.48   11.40
  -2  -7   6  158.98   10.50
   1   7  -6  170.78   11.80
   1   7  -6  173.08   13.80
  -1  -7   6  159.68   13.90
  -1  -7   6  178.48   11.50
   0   7  -6   39.60    7.60
   0   7  -6   41.10    6.90
   0  -7   6   38.50    7.60
   0  -7   6   48.70    5.60
  -1   7  -6  231.48   16.60
  -1   7  -6  230.88   15.10
   1  -7   6  219.88   16.50
   1  -7   6  232.18   14.50
  -2   7  -6  170.38   13.30
  -2   7  -6  185.68   14.60
   2  -7   6  177.18   12.60
   2  -7   6  176.58   14.90
  -3   7  -6  206.88   15.40
   3  -7   6  242.98   18.00
   3  -7   6  211.48   14.70
   3  -7   6  202.58   16.00
  -4   7  -6   11.30    4.30
   4  -7   6    6.70    3.60
  -5   7  -6  248.98   18.40
   5  -7   6  249.28   20.30
  -6   7  -6    4.40    3.50
  -7   7  -6   10.00    7.20
  -7  -6   6    6.70    4.30
  -6  -6   6   91.49   11.30
   5   6  -6    2.10    3.30
  -5  -6   6    3.60    1.00
  -5  -6   6    0.60    0.90
  -5  -6   6   -3.00    2.60
   4   6  -6   76.79    9.90
  -4  -6   6   65.49    5.10
  -4  -6   6   75.89    9.80
  -4  -6   6   70.69    5.00
   3   6  -6  163.48   13.80
  -3  -6   6  185.48   10.10
  -3  -6   6  177.58    9.60
  -3  -6   6  118.99   12.70
   2   6  -6   39.90    4.80
   2   6  -6   52.89    6.80
  -2  -6   6   54.69    5.10
  -2  -6   6   47.30    8.60
   1   6  -6  250.17   13.90
   1   6  -6  224.48   15.40
  -1  -6   6  243.78   13.00
  -1  -6   6  203.18   15.40
   0   6  -6   62.19    6.60
   0   6  -6   55.49    6.90
   0  -6   6   50.19    8.40
   0  -6   6   56.89    6.00
  -1   6  -6   76.89    8.20
  -1   6  -6   63.49    7.30
   1  -6   6   77.29    7.00
   1  -6   6   60.09    8.00
  -2   6  -6   35.60    6.60
  -2   6  -6   32.10    6.60
   2  -6   6   37.70    7.40
   2  -6   6   40.00    6.20
   2  -6   6   35.30    6.70
  -3   6  -6  283.67   18.10
   3  -6   6  289.57   18.80
   3  -6   6  294.87   20.00
   3  -6   6  329.37   18.00
  -4   6  -6   62.79    9.60
   4  -6   6   68.79    9.30
   4  -6   6   74.09    9.00
   4  -6   6   65.39   11.10
  -5   6  -6    7.20    4.40
   5  -6   6    5.80    4.00
  -6   6  -6   98.69   11.30
   6  -6   6   66.49   12.10
  -7   6  -6    6.30    5.10
   7  -6   6    1.70    5.90
  -8  -5   6    7.90    6.20
  -7  -5   6    1.10    3.50
   6   5  -6  182.28   16.90
  -6  -5   6  179.08   15.40
   5   5  -6    4.70    4.10
  -5  -5   6   -0.40    2.90
   4   5  -6  295.87   19.40
  -4  -5   6  323.37   19.70
  -4  -5   6  297.97   12.60
  -4  -5   6  303.37   12.30
   3   5  -6  171.38   13.00
  -3  -5   6  122.19   11.90
  -3  -5   6  166.08    8.40
  -3  -5   6  153.38    8.70
   2   5  -6  184.48   13.10
   2   5  -6  185.18   10.40
  -2  -5   6  181.58   13.60
  -2  -5   6  172.78    9.70
   1   5  -6    5.20    2.50
   1   5  -6    3.50    2.00
  -1  -5   6    7.80    3.70
  -1  -5   6    6.40    2.40
   0   5  -6    4.60    2.50
   0   5  -6    3.10    2.40
   0  -5   6    1.30    1.80
   0  -5   6    2.60    2.40
  -1   5  -6   -0.30    1.90
  -1   5  -6   -0.90    1.50
   1  -5   6   -0.50    1.30
   1  -5   6   -2.60    1.40
  -2   5  -6    4.00    2.40
   2  -5   6    0.40    1.70
   2  -5   6    0.70    2.00
   2  -5   6    3.00    2.10
  -3   5  -6    0.00    1.80
   3  -5   6   -1.20    1.70
   3  -5   6   -1.90    1.70
   3  -5   6   -0.90    1.50
   4  -5   6  602.84   31.80
   4  -5   6  582.54   30.40
  -5   5  -6    6.60    3.40
   5  -5   6    9.00    3.40
   5  -5   6    1.10    2.50
  -6   5  -6   55.79    9.20
   6  -5   6   46.20    9.80
  -7   5  -6   92.99   12.90
   7  -5   6   82.59   14.40
  -8  -4   6    2.50    4.60
  -7  -4   6  353.16   22.90
   6   4  -6  127.89   13.80
  -6  -4   6  155.48   13.40
   5   4  -6   13.10    4.70
  -5  -4   6   14.40    4.60
   4   4  -6   36.90    7.10
  -4  -4   6   38.20    6.80
  -4  -4   6   33.20    2.20
  -4  -4   6   32.90    2.30
   3   4  -6    2.80    2.30
   3   4  -6    3.50    1.50
  -3  -4   6    3.90    1.20
  -3  -4   6    0.50    2.30
   2   4  -6   66.39    6.90
   2   4  -6   64.19    5.10
  -2  -4   6   67.69    4.90
  -2  -4   6   56.49    7.20
   1   4  -6   62.69    6.50
   1   4  -6   60.79    5.50
  -1  -4   6   68.29    5.40
  -1  -4   6   71.29    7.30
   0   4  -6   31.80    4.90
   0   4  -6   42.20    5.40
   0  -4   6   35.90    4.90
   0  -4   6   30.80    5.70
  -1   4  -6  683.53   29.90
  -1   4  -6  648.54   28.30
   1  -4   6  659.73   27.80
   1  -4   6  654.23   29.90
  -2   4  -6   67.89    6.70
   2  -4   6   50.19    6.60
   2  -4   6   64.49    6.80
   2  -4   6   66.69    6.20
  -3   4  -6  128.99   10.10
   3  -4   6  131.19    9.70
   3  -4   6  143.79   11.40
   3  -4   6  118.19   11.00
  -4   4  -6   -0.80    1.90
   4  -4   6    0.30    2.20
   4  -4   6   -2.60    2.20
   4  -4   6    1.40    1.80
  -5   4  -6   74.49    9.80
   5  -4   6   68.19    7.60
   5  -4   6   82.99    9.70
   5  -4   6   66.19   11.10
  -6   4  -6    9.80    4.60
   6  -4   6    8.30    5.20
  -7   4  -6  215.38   16.80
   7  -4   6  195.78   19.40
  -8  -3   6   25.40    7.30
   7   3  -6  232.98   19.00
   6   3  -6  177.18   15.30
  -6  -3   6  214.68   15.20
   5   3  -6  139.39   12.40
  -5  -3   6  164.48   12.30
   4   3  -6  559.94   27.60
  -4  -3   6  597.44   27.10
   3   3  -6    7.20    1.60
   3   3  -6    2.70    2.10
  -3  -3   6    6.10    1.40
  -3  -3   6   10.50    3.30
   2   3  -6 2469.15   88.99
   2   3  -6 2543.35   85.89
  -2  -3   6 2399.06   92.59
  -2  -3   6 2533.25   85.49
   1   3  -6  254.47   13.70
   1   3  -6  252.67   12.60
  -1  -3   6  263.07   12.20
  -1  -3   6  251.67   14.20
   0   3  -6   73.19    6.00
   0   3  -6   74.29    6.50
   0  -3   6   62.99    6.30
   0  -3   6   58.79    5.30
  -1   3  -6  584.24   25.00
   1  -3   6  555.04   25.30
   1  -3   6  596.84   24.70
   1  -3   6  586.74   26.30
  -2   3  -6  124.39    9.20
   2  -3   6  126.89   10.20
   2  -3   6  132.29    9.00
   2  -3   6  141.59   10.20
  -3   3  -6   77.69    7.40
   3  -3   6   79.29    7.90
   3  -3   6   64.59    7.70
   3  -3   6   65.19    6.30
  -4   3  -6  105.59   10.40
  -4   3  -6  106.39    9.40
   4  -3   6   98.89    9.70
   4  -3   6  106.89   10.70
   4  -3   6   89.09    8.10
  -5   3  -6  180.18   15.20
   5  -3   6  181.88   14.90
  -6   3  -6  271.97   20.00
  -6   3  -6  222.98   16.30
   6  -3   6  246.68   15.60
  -7   3  -6    2.90    4.10
  -7   3  -6    4.00    3.60
  -8  -2   6   -5.00    3.10
   7   2  -6  140.99   14.90
  -7  -2   6  214.08   15.40
   6   2  -6  135.39   12.80
  -6  -2   6  183.68   13.20
   5   2  -6   12.90    4.50
  -5  -2   6   14.50    4.10
   4   2  -6    8.10    3.40
   4   2  -6    9.40    0.90
  -4  -2   6   13.70    3.40
  -4  -2   6   11.60    1.60
   3   2  -6  144.09    9.80
   3   2  -6  135.79    6.70
  -3  -2   6  149.49    9.60
  -3  -2   6  140.39    6.60
   2   2  -6 1256.07   43.80
   2   2  -6 1248.68   45.80
  -2  -2   6 1284.37   43.70
  -2  -2   6 1115.59   45.60
   1   2  -6 1333.27   48.60
   1   2  -6 1323.87   47.80
  -1  -2   6 1324.07   48.90
  -1  -2   6 1327.17   47.60
   0   2  -6  269.17   13.40
   0   2  -6  254.67   12.80
   0  -2   6  261.97   12.80
   0  -2   6  277.67   13.70
  -1   2  -6 2034.40   72.99
   1  -2   6 1992.90   73.29
   1  -2   6 2075.59   73.09
   1  -2   6 2054.39   74.09
  -2   2  -6   81.99    6.90
  -2   2  -6   72.49    6.90
   2  -2   6   83.49    7.20
   2  -2   6   68.59    7.10
   2  -2   6   71.29    6.20
  -3   2  -6    8.40    3.00
  -3   2  -6    9.20    3.40
   3  -2   6   10.90    3.10
   3  -2   6   10.20    3.40
  -4   2  -6  634.84   30.40
  -4   2  -6  593.34   27.70
   4  -2   6  578.14   26.80
   4  -2   6  600.04   29.70
  -5   2  -6  151.68   13.70
  -5   2  -6  153.98   11.80
   5  -2   6  152.28   13.20
   5  -2   6  153.78   11.10
  -6   2  -6    5.80    4.10
  -6   2  -6   21.10    6.70
   6  -2   6   20.90    4.00
  -7   2  -6  221.28   16.20
  -7   2  -6  236.88   20.30
  -9  -1   6    6.70    5.20
  -8  -1   6   -6.10    2.80
   7   1  -6   17.50    6.60
  -7  -1   6   26.60    6.00
   6   1  -6   75.59    8.60
  -6  -1   6   80.69    8.20
   5   1  -6   55.99    6.90
  -5  -1   6   82.09    7.30
   4   1  -6  632.64   21.40
   4   1  -6  490.75   25.40
  -4  -1   6  613.34   21.70
  -4  -1   6  645.34   26.00
   3   1  -6   43.70    3.20
   3   1  -6   47.90    4.70
  -3  -1   6   38.90    3.90
  -3  -1   6   40.90    3.20
   2   1  -6    4.00    1.50
   2   1  -6    4.40    1.70
  -2  -1   6    5.30    1.70
   1   1  -6   25.50    3.50
   1   1  -6   24.30    2.80
  -1  -1   6   21.80    2.90
  -1  -1   6   23.90    3.30
   0   1  -6 1971.70   69.59
   0  -1   6 2007.50   69.49
   0  -1   6 1963.60   69.49
   0  -1   6 1926.41   68.79
  -1   1  -6   45.70    4.80
  -1   1  -6   44.40    4.90
   1  -1   6   58.09    5.20
   1  -1   6   53.89    4.90
  -2   1  -6    0.30    1.60
  -2   1  -6    0.10    1.50
   2  -1   6    0.50    1.30
   2  -1   6    2.10    1.90
  -3   1  -6   25.80    5.40
  -3   1  -6   19.70    4.30
   3  -1   6   22.80    4.10
   3  -1   6   29.90    5.50
  -4   1  -6   29.60    5.40
  -4   1  -6   39.90    7.40
   4  -1   6   38.80    7.40
   4  -1   6   42.50    6.20
  -5   1  -6  183.28   12.80
  -5   1  -6  172.48   14.50
   5  -1   6  173.38   11.90
   5  -1   6  203.08   15.50
  -6   1  -6   22.30    5.20
  -6   1  -6   20.90    6.60
   6  -1   6   21.30    5.00
  -7   1  -6    0.90    4.80
  -7   1  -6   -0.40    3.00
  -9   0   6   60.89   11.10
   8   0  -6    6.30    4.90
  -8   0   6   16.10    5.10
   7   0  -6  264.97   17.80
  -7   0   6  259.87   17.00
   6   0  -6   47.20    2.00
   6   0  -6   49.80    6.70
  -6   0   6   55.39    6.70
   5   0  -6  100.59    8.70
   5   0  -6  112.19    5.80
   5   0  -6  115.09    5.50
  -5   0   6  123.39    8.80
   4   0  -6  364.66   13.80
   4   0  -6  305.77   16.00
  -4   0   6  323.57   14.10
  -4   0   6  365.36   15.90
   3   0  -6   27.20    2.80
   3   0  -6   27.40    3.30
  -3   0   6   30.90    3.20
  -3   0   6   27.70    2.90
   2   0  -6 1153.98   40.30
   2   0  -6 1182.58   42.10
  -2   0   6 1183.78   40.20
  -2   0   6 1141.99   42.10
   1   0  -6  803.82   35.90
  -1   0   6  979.80   33.20
  -1   0   6  965.60   35.10
  -1   0   6  982.80   32.80
   0   0  -6 2000.90   69.39
   0   0   6 1966.00   67.99
   0   0   6 1998.90   68.39
   0   0   6 1857.51   68.99
  -1   0  -6  950.40   37.10
  -1   0  -6  971.60   37.40
   1   0   6 1026.60   39.60
   1   0   6  943.51   37.00
  -2   0  -6   54.79    5.80
  -2   0  -6   45.20    5.00
   2   0   6   43.60    4.90
   2   0   6   50.19    5.50
  -3   0  -6   20.70    4.20
  -3   0  -6   18.10    4.50
   3   0   6   19.30    4.40
   3   0   6   23.70    4.50
  -4   0  -6   73.29    7.20
  -4   0  -6   66.99    7.90
   4   0   6   74.39    8.40
   4   0   6   79.89    7.10
  -5   0  -6  499.55   23.80
  -5   0  -6  445.36   26.10
   5   0   6  492.75   27.10
   5   0   6  426.06   22.20
  -6   0  -6  103.09   12.40
  -6   0  -6  102.09    9.60
   6   0   6  109.69    9.30
  -7   0  -6   11.30    4.50
  -7   0  -6   13.20    6.70
  -9   1   6    1.50    4.40
   8  -1  -6   42.50    8.00
  -8   1   6   34.00    7.60
   7  -1  -6  376.06   14.30
   7  -1  -6  359.56   21.30
   7  -1  -6  359.76   14.40
  -7   1   6  378.06   21.00
   6  -1  -6  347.97   18.90
   6  -1  -6  346.47   14.50
   6  -1  -6  321.47   13.90
  -6   1   6  348.67   18.40
   5  -1  -6   35.10    4.60
   5  -1  -6   31.40    3.50
   5  -1  -6   34.60    3.40
  -5   1   6   36.20    4.50
   4  -1  -6  161.58    8.30
   4  -1  -6  164.28    9.20
  -4   1   6  164.38    8.90
  -4   1   6  153.48    8.60
   3  -1  -6   46.30    4.00
   3  -1  -6   36.20    3.10
  -3   1   6   43.60    4.00
  -3   1   6   44.50    3.00
  -2   1   6   71.39    5.50
   1  -1  -6   67.99    5.50
  -1   1   6   69.99    3.40
  -1   1   6   69.19    3.30
  -1   1   6   71.19    5.60
   0  -1  -6  189.58    9.00
   0  -1  -6  193.58   10.40
   0   1   6  185.28    9.10
   0   1   6  167.38    9.90
  -1  -1  -6  124.29    8.10
  -1  -1  -6  128.09    8.50
   1   1   6  132.29    8.50
   1   1   6  130.69    8.30
  -2  -1  -6   20.00    3.90
  -2  -1  -6   26.30    4.80
   2   1   6   23.90    4.20
  -3  -1  -6    9.00    3.00
  -3  -1  -6   14.80    4.20
   3   1   6   10.00    3.40
   3   1   6   10.20    3.00
  -4  -1  -6    8.60    3.20
  -4  -1  -6   15.50    4.90
   4   1   6   18.60    5.20
   4   1   6   10.50    3.40
  -5  -1  -6   94.09   10.80
  -5  -1  -6  101.79    9.00
   5   1   6   96.89    8.40
   5   1   6  100.39   11.50
  -6  -1  -6    8.40    4.60
  -6  -1  -6   -0.90    2.50
   6   1   6   -2.10    3.40
  -7  -1  -6    1.70    3.40
  -7  -1  -6    2.10    4.30
  -9   2   6   52.49    9.90
   8  -2  -6   30.90    3.30
   8  -2  -6   24.20    5.60
   8  -2  -6   25.20    3.30
  -8   2   6   35.70    7.00
   7  -2  -6  489.65   20.60
   7  -2  -6  488.45   25.50
   7  -2  -6  501.55   24.40
  -7   2   6  508.85   25.60
   6  -2  -6    6.40    2.90
   6  -2  -6    5.60    2.20
   6  -2  -6    7.00    2.20
  -6   2   6   12.40    3.40
   5  -2  -6    6.10    1.90
   5  -2  -6    9.40    2.40
   5  -2  -6    3.60    1.80
  -5   2   6    6.20    2.10
   4  -2  -6  139.49    7.80
   4  -2  -6  136.59    8.30
  -4   2   6  146.49    9.00
   3  -2  -6   98.49    6.70
   3  -2  -6   93.69    4.60
   3  -2  -6   88.19    4.60
  -3   2   6  102.29    7.10
   2  -2  -6  157.18    9.00
  -2   2   6  141.09    9.00
   1  -2  -6   31.80    4.40
   1  -2  -6   27.30    1.90
  -1   2   6   28.30    4.40
  -1   2   6   27.10    2.30
   0  -2  -6  189.48   10.80
   0  -2  -6  188.68    9.30
   0   2   6  187.38    9.70
   0   2   6  171.48   10.50
  -1  -2  -6   22.20    4.20
   1   2   6   26.30    4.50
   1   2   6   28.00    4.50
  -2  -2  -6  502.55   22.80
  -2  -2  -6  509.35   23.60
   2   2   6  537.55   24.30
   2   2   6  480.35   22.60
  -3  -2  -6    0.60    1.60
  -3  -2  -6    0.30    1.70
   3   2   6    1.10    1.60
   3   2   6    1.40    2.30
  -4  -2  -6   81.59    8.90
  -4  -2  -6   85.39    7.80
   4   2   6   74.29    7.20
   4   2   6   81.29    9.40
  -5  -2  -6   -4.50    2.00
  -5  -2  -6   -2.00    2.00
   5   2   6   -4.80    1.70
  -6  -2  -6   -0.50    2.10
  -6  -2  -6   10.40    4.90
   6   2   6   -4.90    2.40
  -7  -2  -6   30.50    6.60
  -7  -2  -6   32.90    8.80
   8  -3  -6   48.40    8.40
   8  -3  -6   37.60    5.00
   8  -3  -6   44.50    5.20
  -8   3   6   51.79    8.40
   7  -3  -6   25.60    4.50
   7  -3  -6   25.30    5.10
   7  -3  -6   26.10    4.50
  -7   3   6   27.40    6.00
   6  -3  -6  134.59    9.80
   6  -3  -6  118.19    9.70
   6  -3  -6  125.29    8.70
   6  -3  -6  127.29    9.00
   5  -3  -6   20.70    4.10
   5  -3  -6   21.70    4.20
   5  -3  -6   31.60    5.20
   5  -3  -6   26.90    4.50
   4  -3  -6  582.74   22.40
   4  -3  -6  574.24   22.80
   4  -3  -6  547.65   24.00
  -4   3   6  545.45   24.80
   3  -3  -6   92.79    7.00
   3  -3  -6   92.69    4.80
   3  -3  -6   87.39    5.00
  -3   3   6   90.99    7.30
   2  -3  -6  336.17   12.00
   2  -3  -6  321.37   15.80
  -2   3   6  295.27   15.80
   1  -3  -6  302.77   14.80
   1  -3  -6  279.47   11.70
  -1   3   6  272.97   12.10
  -1   3   6  275.27   14.60
   0  -3  -6   90.29    6.00
   0  -3  -6   76.49    6.60
   0   3   6   62.89    5.90
   0   3   6   74.19    6.70
  -1  -3  -6   27.20    4.40
  -1  -3  -6   22.60    4.30
   1   3   6   32.40    5.30
   1   3   6   21.30    4.30
  -2  -3  -6   -1.60    1.20
  -2  -3  -6    2.50    2.00
   2   3   6    0.30    1.60
  -3  -3  -6    2.80    2.20
  -3  -3  -6    0.90    1.70
   3   3   6    5.00    3.60
   3   3   6   -0.50    1.90
  -4  -3  -6    6.00    3.20
  -4  -3  -6    7.20    2.60
   4   3   6    7.30    3.50
   4   3   6    7.10    3.20
  -5  -3  -6   81.49    8.00
  -5  -3  -6   80.59   10.00
   5   3   6   69.49    7.80
  -6  -3  -6    3.30    3.00
  -6  -3  -6    7.90    5.70
   6   3   6   -5.30    2.60
  -7  -3  -6    1.00    5.70
  -7  -3  -6   -4.00    3.90
   8  -4  -6   13.50    4.50
   8  -4  -6    4.70    4.10
   8  -4  -6    0.70    2.80
   8  -4  -6    6.20    2.90
   7  -4  -6  181.78   12.10
   7  -4  -6  198.18   14.00
   7  -4  -6  177.88   11.70
   7  -4  -6  184.18   13.30
   6  -4  -6   81.79    7.40
   6  -4  -6   78.59    7.30
   6  -4  -6   81.49    7.90
   6  -4  -6   69.19    7.40
   5  -4  -6  554.94   25.50
   5  -4  -6  573.14   24.90
   5  -4  -6  536.75   23.40
   5  -4  -6  518.65   23.90
   4  -4  -6   34.00    3.60
   4  -4  -6   34.60    5.50
   4  -4  -6   34.10    3.90
  -4   4   6   31.40    5.60
   3  -4  -6   15.70    3.70
   3  -4  -6   17.10    2.80
   3  -4  -6   14.20    2.30
  -3   4   6   16.40    4.00
   2  -4  -6  132.19    9.20
   2  -4  -6  109.09    6.70
  -2   4   6  133.49    6.90
  -2   4   6  129.99    9.60
   1  -4  -6  587.04   25.70
   1  -4  -6  600.94   23.20
  -1   4   6  572.54   26.20
  -1   4   6  567.14   23.50
   0  -4  -6  108.59    7.40
   0  -4  -6  111.29    8.50
   0   4   6  107.69    8.10
   0   4   6   94.09    8.20
  -1  -4  -6  877.91   34.80
  -1  -4  -6  884.51   34.60
   1   4   6  827.72   35.00
   1   4   6  731.43   35.00
  -2  -4  -6    4.70    2.80
  -2  -4  -6    7.00    3.20
   2   4   6    4.00    3.10
   2   4   6    2.30    2.50
  -3  -4  -6    1.40    2.00
  -3  -4  -6   -1.80    2.00
   3   4   6    0.70    2.10
   3   4   6   -3.90    2.70
  -4  -4  -6   17.20    5.40
   4   4   6   17.10    6.40
  -5  -4  -6  117.09   12.40
  -5  -4  -6  120.19   10.10
   5   4   6  106.39    9.90
  -6  -4  -6   -1.00    2.90
   8  -5  -6  148.89   11.70
   8  -5  -6  147.69   14.00
   8  -5  -6  174.78   12.50
   8  -5  -6  160.58   13.00
   7  -5  -6    5.60    3.00
   7  -5  -6   12.20    4.00
   7  -5  -6    0.50    2.40
   7  -5  -6    6.90    4.10
   6  -5  -6   66.69    7.40
   6  -5  -6   67.49    6.50
   6  -5  -6   61.09    6.90
   6  -5  -6   64.99    7.30
   5  -5  -6  433.46   22.80
   5  -5  -6  462.25   22.40
   5  -5  -6  442.76   21.20
   5  -5  -6  431.16   20.10
   4  -5  -6    1.80    2.10
   4  -5  -6   -1.10    1.60
   4  -5  -6   -0.90    1.10
  -4   5   6   -3.20    1.90
   3  -5  -6    7.40    2.20
   3  -5  -6    7.90    2.40
   3  -5  -6   17.70    4.30
  -3   5   6   13.20    4.20
   2  -5  -6    8.80    3.00
   2  -5  -6    6.90    2.40
  -2   5   6    7.40    2.40
  -2   5   6    8.60    3.30
   1  -5  -6  104.19    7.40
   1  -5  -6   99.89    8.60
  -1   5   6  104.59    9.00
  -1   5   6  106.99    7.70
   0  -5  -6   -0.30    1.40
   0  -5  -6    2.00    2.10
   0   5   6    1.00    2.00
   0   5   6    2.40    2.30
  -1  -5  -6   58.29    6.70
  -1  -5  -6   79.49    7.30
   1   5   6   67.29    7.80
   1   5   6   84.19    8.00
  -2  -5  -6  164.28   12.10
  -2  -5  -6  138.49   10.60
   2   5   6  124.19   11.90
   2   5   6  155.28   11.50
  -3  -5  -6   17.20    5.30
  -3  -5  -6   14.00    4.30
   3   5   6   17.10    5.90
  -4  -5  -6    7.60    3.70
  -4  -5  -6    4.20    2.80
   4   5   6    4.00    4.90
   4   5   6   -1.10    2.50
  -5  -5  -6    2.80    2.90
  -5  -5  -6   -1.70    2.60
  -6  -5  -6    3.70    3.90
  -6  -5  -6   -1.70    4.40
   8  -6  -6   -3.50    3.70
   8  -6  -6   13.80    4.50
   8  -6  -6    2.60    4.30
   8  -6  -6   -8.00    2.60
   7  -6  -6   -3.80    2.80
   7  -6  -6   -5.30    3.20
   7  -6  -6    1.10    3.80
   7  -6  -6    4.50    3.10
   6  -6  -6    2.40    2.80
   6  -6  -6   -0.20    1.90
   6  -6  -6    8.80    3.60
   5  -6  -6  346.37   21.20
   5  -6  -6  374.46   19.30
   4  -6  -6   45.10    7.00
   4  -6  -6   44.30    4.80
   4  -6  -6   31.40    5.20
  -4   6   6   33.40    6.90
   3  -6  -6  282.07   14.30
   3  -6  -6  314.77   17.60
  -3   6   6  286.77   17.80
   2  -6  -6  144.79   12.00
   2  -6  -6  189.68   12.90
  -2   6   6  206.98   11.40
  -2   6   6  169.88   12.90
   1  -6  -6   70.19    6.90
   1  -6  -6   72.49    7.70
  -1   6   6   70.79    8.20
  -1   6   6   72.59    7.20
   0  -6  -6   56.29    6.50
   0  -6  -6   73.49    7.40
   0   6   6   52.49    7.80
   0   6   6   55.99    8.00
  -1  -6  -6   76.29    7.90
   1   6   6   60.39    7.90
  -2  -6  -6  279.07   17.80
  -2  -6  -6  302.27   17.30
   2   6   6  280.87   17.70
   2   6   6  281.47   19.70
  -3  -6  -6   52.39    9.20
  -3  -6  -6   57.49    8.00
   3   6   6   60.29    8.70
   3   6   6   37.40    9.20
  -4  -6  -6   58.79   10.20
  -4  -6  -6   31.60    6.00
  -5  -6  -6  108.99   10.40
  -5  -6  -6  105.49   12.60
   7  -7  -6   99.79   10.30
   7  -7  -6  106.09   10.00
   6  -7  -6   35.00    6.90
   6  -7  -6   54.49    6.20
   6  -7  -6   47.70    7.90
   5  -7  -6  178.48   13.00
   5  -7  -6  197.58   12.30
   5  -7  -6  196.88   14.20
   5  -7  -6  193.38   14.70
   4  -7  -6  817.12   34.90
   4  -7  -6  790.02   36.40
  -4   7   6  797.62   37.70
   3  -7  -6  164.38   12.50
   3  -7  -6  144.19   11.20
  -3   7   6  154.98   13.30
  -3   7   6  172.08   11.00
   2  -7  -6   -4.50    1.90
   2  -7  -6    0.90    2.30
  -2   7   6    0.50    2.90
  -2   7   6    1.00    2.60
   1  -7  -6  391.06   20.50
   1  -7  -6  388.96   21.30
  -1   7   6  372.56   22.10
  -1   7   6  398.96   20.80
   0  -7  -6   51.19    7.90
   0  -7  -6   59.29    7.20
   0   7   6   60.29    9.00
   0   7   6   47.70    8.40
  -1  -7  -6    9.00    3.90
  -1  -7  -6   14.70    4.30
   1   7   6   14.60    4.90
   1   7   6    9.80    4.20
  -2  -7  -6   16.00    4.60
   2   7   6   12.30    5.00
  -3  -7  -6  171.28   14.60
  -3  -7  -6  176.08   13.30
  -4  -7  -6   66.49   11.20
  -4  -7  -6   67.49    9.60
  -5  -7  -6    3.20    4.90
  -5  -7  -6    1.80    3.00
   7  -8  -6   18.30    6.60
   7  -8  -6   12.10    4.40
   7  -8  -6   18.70    6.40
   6  -8  -6   32.20    7.00
   6  -8  -6   24.20    6.80
   6  -8  -6   24.40    5.20
   5  -8  -6   -3.70    2.60
   5  -8  -6    0.70    3.40
   4  -8  -6   89.69    9.70
   4  -8  -6   69.99    8.20
   4  -8  -6   73.39    7.40
   3  -8  -6   71.79   10.00
   3  -8  -6   68.89    8.30
  -3   8   6   76.69    7.80
   2  -8  -6    2.60    3.30
   2  -8  -6    1.20    2.90
  -2   8   6   -2.40    2.00
   1  -8  -6   15.50    4.80
   1  -8  -6    1.20    2.50
  -1   8   6    2.90    3.20
   0  -8  -6  221.68   15.50
   0  -8  -6  213.48   15.20
   0   8   6  207.98   15.70
  -1  -8  -6  116.89   10.70
  -1  -8  -6  108.29   10.50
   1   8   6   95.69   11.40
  -2  -8  -6  394.46   22.60
  -2  -8  -6  421.26   24.50
   2   8   6  387.16   25.60
  -3  -8  -6   47.40    8.10
  -3  -8  -6   38.50    9.10
  -4  -8  -6    3.40    4.50
  -4  -8  -6   11.60    6.10
   6  -9  -6   14.50    6.40
   6  -9  -6   15.10    5.20
   5  -9  -6   10.00    5.10
   5  -9  -6    1.70    4.30
   5  -9  -6    8.60    3.80
   4  -9  -6   12.60    5.70
   4  -9  -6    5.20    4.00
   4  -9  -6   12.10    4.60
   3  -9  -6   89.69   10.30
   3  -9  -6   61.59    9.70
  -3   9   6   97.29    9.30
   2  -9  -6    4.00    4.10
   2  -9  -6   10.40    5.10
  -2   9   6    9.60    4.70
   1  -9  -6    4.40    4.20
   1  -9  -6   -0.50    3.80
  -1   9   6    2.00    3.80
   0  -9  -6  102.29   12.70
   0  -9  -6   91.69   10.50
   0   9   6   98.29   11.20
  -1  -9  -6   60.69    9.70
  -1  -9  -6   70.69    9.00
   1   9   6   58.69   11.20
  -2  -9  -6    9.30    4.80
  -2  -9  -6   -1.50    3.60
  -3  -9  -6   61.89   11.50
  -3  -9  -6   50.39    8.90
   5 -10  -6   12.60    5.50
   4 -10  -6    7.60    5.20
   4 -10  -6    0.80    3.80
   4 -10  -6    1.90    3.60
   3 -10  -6    5.20    4.50
  -3  10   6    5.90    4.90
   2 -10  -6   43.90    9.10
   2 -10  -6   57.19   11.40
  -2  10   6   74.79    9.80
   1 -10  -6   66.19   11.80
   1 -10  -6   68.49    9.00
  -1  10   6   57.89   10.80
   0 -10  -6   -6.70    3.20
   0  10   6  -10.30    4.80
  -1 -10  -6   20.00    6.60
  -1 -10  -6   20.20    6.40
  -2 -10  -6  138.89   14.80
  -2 -10  -6  150.08   14.10
   3 -11  -6   16.20    8.00
   3 -11  -6    5.70    5.70
  -3  11   6   20.60    6.40
   2 -11  -6   30.60    7.90
   2 -11  -6   17.50    6.60
  -2  11   6   10.70    7.30
   1 -11  -6   37.60    8.90
   1 -11  -6   34.70    8.00
   0 -11  -6   23.10    7.60
   0 -11  -6   22.80    7.10
  -2 -12   7    0.70    4.50
  -2 -12   7   -2.20    6.70
  -1 -12   7   26.60    7.00
  -1 -12   7   15.50    8.70
   0 -12   7    2.80    7.00
   0 -12   7    0.50    5.10
   1 -12   7  201.18   20.60
   1 -12   7  176.78   16.60
   2 -12   7   44.20   10.60
   2 -12   7   16.00    9.40
  -4 -11   7   34.10    6.90
  -4 -11   7   33.20    6.60
  -4 -11   7   38.60   11.30
  -3 -11   7  130.59   17.70
  -3 -11   7  150.08   12.20
  -3 -11   7  150.98   12.70
  -2 -11   7   19.20   10.60
  -2 -11   7   32.50    7.20
  -1 -11   7    6.50    5.40
  -1 -11   7   13.60    5.20
   0 -11   7   95.29   12.90
   0 -11   7   62.79   13.50
   1 -11   7   65.89   11.10
   1 -11   7   48.20   11.90
   2 -11   7  102.29   14.40
   3 -11   7   12.10    6.70
   3 -11   7   16.20    7.30
   4 -11   7   68.59   13.70
   4 -11   7   46.50   13.10
  -5 -10   7   -5.60    5.50
  -5 -10   7   -9.00    3.40
  -4 -10   7   23.20    5.20
  -4 -10   7   32.70    6.10
  -3 -10   7    1.10    5.50
  -3 -10   7    2.50    3.30
  -3 -10   7    2.10    3.50
  -2 -10   7  216.18   14.30
  -2 -10   7  152.58   17.90
  -2 -10   7  197.68   14.60
  -1 -10   7  416.96   28.90
  -1 -10   7  403.46   22.60
  -1 -10   7  411.76   23.60
   0 -10   7   94.29   10.70
   0 -10   7   87.89   14.50
   1 -10   7    5.40    4.60
   1 -10   7    9.60    4.90
  -2  10  -7   10.90    5.10
   2 -10   7   11.60    6.30
  -3  10  -7   14.60    5.10
   3 -10   7    6.20    5.50
  -4  10  -7   63.19   10.90
   4 -10   7   52.49   12.40
  -5  10  -7   76.79   13.40
   5 -10   7   66.09   15.10
  -6  -9   7   -1.30    4.10
  -6  -9   7   -3.20    1.40
  -6  -9   7   -2.60    2.10
  -5  -9   7   -2.30    2.30
  -5  -9   7   -0.40    4.80
  -4  -9   7   -1.90    2.00
  -4  -9   7   -2.80    4.70
  -4  -9   7   -3.20    2.40
  -3  -9   7  316.07   24.60
  -3  -9   7  373.16   18.80
  -3  -9   7  354.26   19.10
  -2  -9   7   75.09    7.90
  -2  -9   7   76.99   13.20
  -2  -9   7   75.19    8.50
   1   9  -7  356.36   27.60
  -1  -9   7  432.06   27.10
  -1  -9   7  390.66   21.40
  -1  -9   7  336.97   23.40
   0   9  -7  390.96   22.70
   0   9  -7  411.86   29.40
   0  -9   7  377.56   25.80
   0  -9   7  412.26   22.20
  -1   9  -7   87.59   11.90
   1  -9   7   57.59    8.50
   1  -9   7   60.29   11.30
  -2   9  -7  122.29   12.40
   2  -9   7   95.89   11.90
  -3   9  -7   70.89   11.10
   3  -9   7   73.59   13.50
  -4   9  -7    6.10    5.30
   4  -9   7    2.30    4.70
  -5   9  -7    2.90    3.50
   5  -9   7    6.20    5.00
  -6  -8   7   72.59   15.20
  -5  -8   7   21.00    7.70
  -5  -8   7   11.90    2.90
  -4  -8   7  152.58   15.90
  -4  -8   7  135.49    8.90
  -4  -8   7  136.29    9.30
   3   8  -7  107.29   12.20
  -3  -8   7  149.69   15.60
  -3  -8   7  117.89    9.20
  -3  -8   7  105.59    8.30
   2   8  -7  284.67   20.50
  -2  -8   7  280.57   16.50
  -2  -8   7  286.47   15.80
  -2  -8   7  278.57   21.20
   1   8  -7   11.40    3.90
   1   8  -7   13.70    5.20
  -1  -8   7   10.50    5.10
  -1  -8   7   15.40    4.20
   0   8  -7  370.36   23.10
   0   8  -7  389.16   21.20
   0  -8   7  366.36   20.00
   0  -8   7  324.57   22.90
  -1   8  -7  112.99   11.00
  -1   8  -7  118.59   12.20
   1  -8   7  123.29   10.50
   1  -8   7  114.19   12.30
  -2   8  -7  167.68   13.90
  -2   8  -7  172.38   15.20
   2  -8   7  175.18   16.20
   2  -8   7  178.58   13.30
  -3   8  -7   16.90    4.80
   3  -8   7    7.70    5.00
  -4   8  -7  216.78   17.40
   4  -8   7  189.68   18.10
  -5   8  -7    5.80    4.90
   5  -8   7    2.00    4.40
  -6   8  -7    4.00    5.60
   6  -8   7    1.00    6.00
  -7  -7   7    7.90    5.00
  -6  -7   7   53.09   10.20
  -5  -7   7   21.30    2.80
  -5  -7   7   21.20    6.90
  -5  -7   7   21.20    2.90
   4   7  -7   -6.10    3.60
  -4  -7   7    1.60    1.60
  -4  -7   7    0.20    1.90
   3   7  -7  480.55   31.30
  -3  -7   7  480.45   22.30
  -3  -7   7  508.65   21.90
   2   7  -7   13.40    3.80
   2   7  -7   14.10    5.20
  -2  -7   7   10.40    3.00
  -2  -7   7   15.50    6.40
   1   7  -7   32.20    6.90
   1   7  -7   31.60    5.60
  -1  -7   7   34.70    8.10
  -1  -7   7   42.50    6.20
   0   7  -7    6.20    3.20
   0   7  -7    7.40    3.30
   0  -7   7    4.10    3.80
   0  -7   7    5.30    3.00
  -1   7  -7  174.48   14.20
  -1   7  -7  168.88   12.80
   1  -7   7  155.58   11.80
   1  -7   7  188.98   15.30
  -2   7  -7   13.10    4.80
  -2   7  -7   13.10    4.60
   2  -7   7    9.00    3.00
   2  -7   7   19.30    5.10
   2  -7   7    7.90    4.40
  -3   7  -7    2.60    3.40
   3  -7   7    2.40    3.30
   3  -7   7   -4.40    2.30
   3  -7   7    2.60    3.30
  -4   7  -7  221.88   16.80
   4  -7   7  234.58   19.00
  -5   7  -7   16.70    5.80
   5  -7   7    6.30    4.70
  -6   7  -7   13.40    6.90
   6  -7   7    3.20    6.40
  -7  -6   7    4.30    5.00
  -6  -6   7   -2.00    3.30
   5   6  -7   95.09   11.90
  -5  -6   7  106.09    4.60
  -5  -6   7  106.29   11.90
   4   6  -7  170.08   14.70
  -4  -6   7  160.88   14.70
  -4  -6   7  177.48    9.40
  -4  -6   7  173.88    8.80
   3   6  -7  105.59   11.10
  -3  -6   7  122.79   12.80
  -3  -6   7  114.69    8.10
  -3  -6   7  119.99    7.60
   2   6  -7  449.06   20.40
   2   6  -7  402.36   23.30
  -2  -6   7  399.06   23.90
  -2  -6   7  440.06   19.80
   1   6  -7   37.00    5.80
   1   6  -7   37.50    7.00
  -1  -6   7   20.40    5.80
  -1  -6   7   38.00    5.50
   0   6  -7   28.20    6.30
   0   6  -7   29.30    5.50
   0  -6   7   34.10    5.60
   0  -6   7   30.10    6.80
  -1   6  -7  121.79   11.00
  -1   6  -7  121.09   10.10
   1  -6   7  127.79    9.80
   1  -6   7  111.79   11.20
  -2   6  -7  154.08   12.20
   2  -6   7  175.78   13.40
   2  -6   7  160.58   13.70
   2  -6   7  157.48   11.50
  -3   6  -7   10.90    4.10
   3  -6   7    2.10    3.00
   3  -6   7   11.10    3.70
   3  -6   7    4.20    2.90
  -4   6  -7   64.89   10.10
   4  -6   7   55.89    8.40
   4  -6   7   53.69   10.10
  -5   6  -7   20.40    6.50
   5  -6   7    6.90    5.50
  -6   6  -7    4.60    4.90
  -7   6  -7    0.50    5.00
  -7  -5   7   87.49   11.20
   6   5  -7   81.99   11.00
  -6  -5   7   84.49   10.20
   5   5  -7   22.80    6.80
  -5  -5   7   26.20    6.40
   4   5  -7   15.20    5.00
  -4  -5   7   15.10    5.40
  -4  -5   7   15.20    2.30
  -4  -5   7   15.30    2.50
   3   5  -7    4.20    2.00
   3   5  -7    7.80    3.30
  -3  -5   7    5.60    3.80
  -3  -5   7    6.00    1.90
   2   5  -7  110.99    7.80
   2   5  -7   97.69    9.30
  -2  -5   7  108.79   10.40
  -2  -5   7  106.69    7.10
   1   5  -7   54.29    5.60
   1   5  -7   39.00    6.70
  -1  -5   7   47.00    7.70
  -1  -5   7   47.70    4.90
   0   5  -7  497.55   23.20
   0   5  -7  508.35   24.90
   0  -5   7  474.95   24.90
   0  -5   7  498.65   22.50
  -1   5  -7   14.70    4.10
  -1   5  -7   14.30    4.20
   1  -5   7   15.90    4.70
   1  -5   7   13.60    3.20
  -2   5  -7    6.00    2.90
   2  -5   7    6.70    3.20
   2  -5   7    9.40    3.30
   2  -5   7   13.50    4.20
  -3   5  -7    0.40    2.40
   3  -5   7    1.70    2.60
   3  -5   7    5.50    3.00
  -4   5  -7   63.39    9.50
   4  -5   7   64.39    7.40
   4  -5   7   58.39   10.50
   4  -5   7   51.09    8.90
  -5   5  -7   14.20    5.10
   5  -5   7    7.80    5.00
  -6   5  -7  169.98   14.80
   6  -5   7  157.28   16.70
  -7   5  -7   38.10    8.60
   7  -5   7   51.29   11.10
  -8  -4   7   23.40    6.70
  -7  -4   7   37.40    8.20
   6   4  -7  280.67   23.70
  -6  -4   7  281.97   22.00
   5   4  -7  150.98   13.30
  -5  -4   7  149.59   12.30
   4   4  -7   11.30    4.10
  -4  -4   7   11.50    1.70
  -4  -4   7   10.10    1.90
  -4  -4   7    8.50    3.60
   3   4  -7  117.09    7.00
   3   4  -7  115.79    9.80
  -3  -4   7  121.49    6.60
  -3  -4   7   89.69    9.20
   2   4  -7  108.09   10.60
   2   4  -7  108.29    7.20
  -2  -4   7  109.89    6.90
  -2  -4   7  103.39    9.30
   1   4  -7   -0.80    1.50
   1   4  -7    0.80    1.40
  -1  -4   7    0.40    1.10
  -1  -4   7    1.40    2.00
   0   4  -7 1953.20   76.79
   0   4  -7 1970.90   72.09
   0  -4   7 1963.00   74.09
   0  -4   7 2029.20   71.59
  -1   4  -7  424.36   21.00
   1  -4   7  447.46   21.90
   1  -4   7  443.56   22.70
   1  -4   7  437.76   20.60
  -2   4  -7  289.47   16.40
   2  -4   7  292.97   15.80
   2  -4   7  278.47   16.80
   2  -4   7  281.27   17.50
  -3   4  -7  196.88   13.20
   3  -4   7  174.88   13.80
   3  -4   7  156.98   12.60
   3  -4   7  163.08   11.60
  -4   4  -7  345.27   20.20
   4  -4   7  383.76   23.20
   4  -4   7  349.96   21.40
   4  -4   7  306.07   18.60
  -5   4  -7    9.80    3.90
   5  -4   7    2.70    3.60
   5  -4   7    3.00    2.40
  -6   4  -7   21.70    5.70
   6  -4   7    6.90    5.70
  -7   4  -7  110.49   12.70
   7  -4   7  116.09   14.90
  -8  -3   7    5.20    4.10
   7   3  -7   19.60    7.30
  -7  -3   7   24.00    6.30
   6   3  -7   81.59   10.20
  -6  -3   7   90.19    9.50
   5   3  -7   19.80    5.50
  -5  -3   7   15.10    4.70
   4   3  -7   53.89    8.00
   4   3  -7   37.30    2.90
  -4  -3   7   41.50    2.70
  -4  -3   7   43.40    5.70
   3   3  -7   62.69    6.50
   3   3  -7   56.99    4.30
  -3  -3   7   58.59    4.10
  -3  -3   7   58.39    6.40
   2   3  -7  195.08   11.60
   2   3  -7  184.38    9.80
  -2  -3   7  181.68   11.80
  -2  -3   7  181.48    9.40
   1   3  -7   55.69    5.80
   1   3  -7   58.19    5.30
  -1  -3   7   63.09    6.50
  -1  -3   7   70.59    5.40
   0   3  -7  152.38   10.10
   0   3  -7  167.38    9.90
   0  -3   7  148.09   10.40
   0  -3   7  146.09   10.50
  -1   3  -7  280.27   15.00
   1  -3   7  285.77   14.60
   1  -3   7  269.17   15.70
  -2   3  -7   35.50    5.70
   2  -3   7   43.50    7.20
   2  -3   7   35.80    6.00
   2  -3   7   49.10    5.20
  -3   3  -7  131.59   10.20
   3  -3   7  125.19   10.60
   3  -3   7  118.49    9.40
   3  -3   7  112.79   10.70
  -4   3  -7   61.79    8.60
   4  -3   7   59.99   14.00
   4  -3   7   60.29    6.70
  -5   3  -7   26.40    7.00
  -5   3  -7   13.00    4.40
   5  -3   7   17.60    4.50
  -6   3  -7   14.70    5.00
  -6   3  -7   12.40    5.60
  -7   3  -7   46.80   10.70
  -7   3  -7   49.60    9.70
  -8  -2   7   12.50    5.00
   7   2  -7   91.49   15.10
  -7  -2   7  115.69   13.00
   6   2  -7   -2.00    2.60
  -6  -2   7   -0.60    1.80
   5   2  -7  365.46   20.90
  -5  -2   7  405.76   20.20
   4   2  -7   76.59    7.40
   4   2  -7   79.59    4.40
  -4  -2   7   86.69    7.20
  -4  -2   7   81.09    4.40
   3   2  -7  418.66   19.60
   3   2  -7  406.76   16.70
  -3  -2   7  440.56   19.60
  -3  -2   7  414.66   16.70
   2   2  -7   11.40    2.40
   2   2  -7   11.60    2.80
  -2  -2   7   11.90    2.30
  -2  -2   7   15.50    3.40
   1   2  -7   29.40    4.10
   1   2  -7   34.70    4.00
  -1  -2   7   29.00    4.10
  -1  -2   7   33.60    4.10
   0   2  -7  377.86   17.60
   0  -2   7  375.16   18.10
   0  -2   7  415.36   18.10
   0  -2   7  383.96   17.60
  -1   2  -7   86.39    7.00
   1  -2   7   78.69    6.50
   1  -2   7   76.39    7.10
   1  -2   7   76.39    6.70
  -2   2  -7    9.00    2.90
   2  -2   7    2.80    1.40
   2  -2   7    0.50    1.60
   2  -2   7    1.20    1.50
  -3   2  -7  135.09   10.20
  -3   2  -7  137.09   11.10
   3  -2   7  138.19    9.90
   3  -2   7  138.79   11.00
  -4   2  -7   -4.40    2.20
  -4   2  -7   -1.40    2.00
   4  -2   7   -0.50    1.90
   4  -2   7   -3.30    1.60
  -5   2  -7  202.08   14.30
  -5   2  -7  209.78   16.70
   5  -2   7  199.48   13.40
  -6   2  -7   35.20    8.80
  -6   2  -7   31.90    7.00
  -7   2  -7  146.29   13.60
  -7   2  -7  158.98   16.30
  -9  -1   7    6.50    5.60
   8   1  -7   43.90    9.30
   7   1  -7  122.69   12.50
  -7  -1   7  144.59   12.10
   6   1  -7   32.70    7.00
  -6  -1   7   36.70    6.20
   5   1  -7   47.70    2.50
  -5  -1   7   43.30    5.40
   4   1  -7    4.80    1.30
   4   1  -7    2.60    2.20
  -4  -1   7    4.10    1.50
  -4  -1   7    8.80    2.60
   3   1  -7  116.99    7.50
   3   1  -7  123.49    6.70
  -3  -1   7  117.59    7.20
  -3  -1   7  115.89    6.70
   2   1  -7  255.47   11.30
   2   1  -7  254.27   11.60
  -2  -1   7  203.28   11.00
  -2  -1   7  254.97   11.60
   1   1  -7  201.28   10.50
  -1  -1   7  183.28   10.20
  -1  -1   7  207.88   10.20
   0   1  -7  630.24   26.80
   0  -1   7  690.53   26.90
   0  -1   7  681.63   26.30
   0  -1   7  638.64   27.00
  -1   1  -7  280.07   14.10
   1  -1   7  269.27   14.30
   1  -1   7  236.68   13.20
   1  -1   7  255.07   13.50
  -2   1  -7  654.03   28.60
  -2   1  -7  672.53   29.60
   2  -1   7  680.53   28.60
   2  -1   7  679.03   29.40
  -3   1  -7  239.68   15.20
  -3   1  -7  221.28   13.60
   3  -1   7  221.28   14.50
   3  -1   7  218.88   13.20
  -4   1  -7    1.40    2.90
  -4   1  -7    5.40    3.20
   4  -1   7   -0.60    3.00
   4  -1   7    2.40    2.10
  -5   1  -7   91.59   10.70
  -5   1  -7   85.39    9.00
   5  -1   7   93.99    8.50
   5  -1   7  107.49   13.00
  -6   1  -7   90.49   11.80
  -6   1  -7  102.39   10.00
  -7   1  -7   -1.80    3.90
  -7   1  -7    7.60    5.60
  -9   0   7   35.20    8.10
   8   0  -7   -4.90    4.40
  -8   0   7    2.40    3.80
   7   0  -7    2.60    3.50
  -7   0   7   16.60    4.80
   6   0  -7    4.40    1.00
   6   0  -7    5.00    1.20
   6   0  -7   -0.10    2.20
  -6   0   7    2.60    2.40
   5   0  -7  366.56   19.90
   5   0  -7  445.26   16.50
  -5   0   7  441.76   19.70
   4   0  -7  146.19    9.50
   4   0  -7  169.68    8.30
  -4   0   7  169.68    8.90
  -4   0   7  187.48    9.40
   3   0  -7  723.83   27.30
   3   0  -7  749.42   28.00
  -3   0   7  707.93   28.10
  -3   0   7  758.52   26.90
   2   0  -7  120.69    7.30
   2   0  -7  122.79    5.80
  -2   0   7  118.49    5.40
  -2   0   7  110.99    7.20
   1   0  -7    3.10    1.50
  -1   0   7    1.20    1.60
  -1   0   7    3.50    1.30
  -1   0   7    2.70    1.00
   0   0  -7  254.17   12.80
   0   0   7  249.68   11.70
   0   0   7  205.68   12.10
   0   0   7  234.68   11.20
  -1   0  -7   19.00    3.90
  -1   0  -7   21.70    4.10
   1   0   7   18.00    3.60
   1   0   7   17.60    3.60
  -2   0  -7  520.55   24.10
  -2   0  -7  524.05   23.50
   2   0   7  492.65   23.00
   2   0   7  520.25   24.00
  -3   0  -7    2.30    1.90
  -3   0  -7    3.70    2.80
   3   0   7    2.40    1.60
   3   0   7    0.80    2.10
  -4   0  -7   79.89    9.10
  -4   0  -7   78.59    7.90
   4   0   7   86.79    8.00
   4   0   7   65.89    8.10
  -5   0  -7  277.77   17.20
  -5   0  -7  303.67   20.40
   5   0   7  281.17   16.70
  -6   0  -7   96.19   11.70
  -6   0  -7  102.29   10.60
  -7   0  -7   25.80    6.80
  -7   0  -7   22.80    6.80
  -9   1   7   58.79   10.40
   8  -1  -7   -1.40    4.00
  -8   1   7   -3.40    2.40
   7  -1  -7   -1.80    1.20
   7  -1  -7    0.60    1.20
   7  -1  -7   -0.20    2.00
  -7   1   7    5.20    2.80
   6  -1  -7    0.40    1.30
   6  -1  -7   -0.40    1.10
   6  -1  -7    3.00    2.30
  -6   1   7   -2.30    1.70
   5  -1  -7  869.21   35.10
   5  -1  -7  902.41   32.70
  -5   1   7  850.51   33.40
   4  -1  -7   37.30    4.00
  -4   1   7   49.00    3.90
  -4   1   7   50.99    4.60
   3  -1  -7  248.78   12.20
   3  -1  -7  256.17   10.70
  -3   1   7  252.77   12.70
   2  -1  -7   13.00    2.90
  -2   1   7   11.50    2.70
   1  -1  -7  570.54   23.90
  -1   1   7  565.14   20.50
  -1   1   7  563.54   20.40
  -1   1   7  583.14   26.00
   0  -1  -7   76.79    5.40
   0  -1  -7   80.09    6.50
   0   1   7   78.69    6.40
   0   1   7   81.79    5.50
  -1  -1  -7  345.97   16.60
  -1  -1  -7  351.06   17.30
   1   1   7  351.96   16.80
   1   1   7  352.26   17.30
  -2  -1  -7  103.69    8.40
  -2  -1  -7   88.39    7.60
   2   1   7   87.69    7.50
   2   1   7   91.79    8.00
  -3  -1  -7    3.20    2.80
  -3  -1  -7    0.30    1.90
   3   1   7    2.40    1.60
   3   1   7    4.70    2.70
  -4  -1  -7   58.69   10.70
  -4  -1  -7   71.29    7.20
   4   1   7   68.89    7.10
   4   1   7   56.79   10.70
  -5  -1  -7  161.68   12.40
  -5  -1  -7  182.98   15.30
   5   1   7  160.08   11.90
  -6  -1  -7   -3.50    3.80
  -6  -1  -7   -1.60    3.60
  -7  -1  -7   -3.20    4.00
  -7  -1  -7    0.70    4.70
   8  -2  -7   17.80    3.00
   8  -2  -7   23.70    3.20
   7  -2  -7   28.70    4.30
   7  -2  -7   22.70    3.40
   7  -2  -7   38.50    6.50
  -7   2   7   41.10    6.80
   6  -2  -7  125.39    8.30
   6  -2  -7  123.19    7.80
  -6   2   7  116.49    9.00
   5  -2  -7    5.10    2.40
   5  -2  -7    4.30    2.10
  -5   2   7    4.30    2.00
  -5   2   7    5.30    2.30
   4  -2  -7   21.60    3.80
   4  -2  -7   15.40    2.40
   4  -2  -7   13.40    2.40
  -4   2   7   20.40    3.80
   3  -2  -7   16.10    3.20
  -3   2   7   11.50    3.60
   2  -2  -7  639.04   25.70
  -2   2   7  578.94   25.60
   1  -2  -7   62.89    5.70
   1  -2  -7   68.99    3.60
  -1   2   7   66.79    4.00
  -1   2   7   78.79    6.50
   0  -2  -7   50.19    5.50
   0  -2  -7   57.39    4.50
   0   2   7   59.19    5.80
   0   2   7   64.49    5.10
  -1  -2  -7  263.07   14.40
  -1  -2  -7  262.57   13.80
   1   2   7  278.47   14.40
   1   2   7  253.37   14.30
  -2  -2  -7  743.23   31.80
  -2  -2  -7  705.23   30.90
   2   2   7  716.63   31.10
   2   2   7  741.63   32.20
  -3  -2  -7    2.40    2.10
  -3  -2  -7    1.40    2.50
   3   2   7    2.50    2.00
   3   2   7   -4.70    2.50
  -4  -2  -7   33.10    7.20
   4   2   7   21.00    5.70
  -5  -2  -7   33.30    7.50
  -5  -2  -7   38.20    6.60
   5   2   7   28.10    5.90
  -6  -2  -7  114.59   11.00
  -6  -2  -7  116.99   13.00
   8  -3  -7  106.29    7.50
   8  -3  -7   98.29   10.30
   8  -3  -7   86.89    7.00
   8  -3  -7  107.79   10.80
   7  -3  -7    7.20    2.90
   7  -3  -7   14.40    4.50
   7  -3  -7   15.00    4.00
   7  -3  -7   16.10    3.90
   6  -3  -7  353.86   20.00
   6  -3  -7  349.77   17.90
   6  -3  -7  357.26   18.30
   6  -3  -7  355.26   17.20
   5  -3  -7  358.86   16.50
   5  -3  -7  370.86   17.60
   5  -3  -7  354.06   16.60
  -5   3   7  365.26   18.40
   4  -3  -7    1.90    1.90
   4  -3  -7    0.10    0.90
   4  -3  -7   -0.10    0.90
  -4   3   7    3.90    2.00
   3  -3  -7  340.17   16.50
  -3   3   7  315.37   16.80
   2  -3  -7    5.30    2.40
  -2   3   7    4.90    2.40
   1  -3  -7   14.00    1.80
   1  -3  -7   18.40    3.80
  -1   3   7   15.40    3.70
  -1   3   7   19.70    2.80
   0  -3  -7   66.49    5.20
   0  -3  -7   68.19    6.30
   0   3   7   59.49    5.60
   0   3   7   62.59    6.30
  -1  -3  -7   17.60    3.90
  -1  -3  -7   13.00    3.00
   1   3   7   18.80    4.50
   1   3   7   22.10    4.50
  -2  -3  -7  626.24   28.70
  -2  -3  -7  660.93   29.60
   2   3   7  670.93   30.60
   2   3   7  646.94   29.20
  -3  -3  -7   69.79    8.00
  -3  -3  -7   81.49    7.70
   3   3   7   80.69    9.20
   3   3   7   76.79    7.80
  -4  -3  -7   40.30    7.60
  -4  -3  -7   31.30    5.90
   4   3   7   27.50    5.90
   4   3   7   40.40    8.80
  -5  -3  -7   15.20    5.60
  -5  -3  -7    5.40    3.40
   5   3   7    6.20    3.30
  -6  -3  -7   56.09    9.00
   8  -4  -7  164.38   13.40
   8  -4  -7  165.28   13.10
   8  -4  -7  156.88   11.20
   8  -4  -7  164.18   10.90
   7  -4  -7  127.49   10.00
   7  -4  -7  110.89    9.70
   7  -4  -7  126.79    9.40
   6  -4  -7   94.29    8.10
   6  -4  -7   88.69    7.70
   6  -4  -7  104.29    8.80
   5  -4  -7   86.79    7.80
   5  -4  -7   78.49    6.00
   5  -4  -7   83.19    6.70
  -5   4   7   83.79    8.20
   4  -4  -7  361.16   15.00
   4  -4  -7  369.26   18.50
   4  -4  -7  369.66   15.60
  -4   4   7  358.46   19.30
   3  -4  -7   14.00    3.70
   3  -4  -7    7.20    1.70
   3  -4  -7   13.20    1.50
  -3   4   7   11.20    3.20
   2  -4  -7    2.30    1.00
   2  -4  -7    4.60    2.30
  -2   4   7    3.10    1.10
  -2   4   7    0.90    2.40
   1  -4  -7   99.09    8.20
   1  -4  -7   95.59    6.00
  -1   4   7   88.59    6.30
  -1   4   7   89.59    8.20
   0  -4  -7   24.20    4.70
   0  -4  -7   24.80    4.60
   0   4   7   25.00    4.60
   0   4   7   28.00    5.10
  -1  -4  -7  415.76   20.10
  -1  -4  -7  427.16   19.60
   1   4   7  361.46   19.70
   1   4   7  316.87   21.50
  -2  -4  -7  155.28   11.40
  -2  -4  -7  138.19   10.50
   2   4   7  145.99   11.00
   2   4   7  133.29   11.70
  -3  -4  -7   15.90    4.50
  -3  -4  -7   22.10    4.90
   3   4   7   15.80    4.80
   3   4   7   11.50    5.50
  -4  -4  -7   94.99   10.50
  -4  -4  -7   96.59    9.10
   4   4   7   89.99   11.10
   4   4   7   73.39    8.70
  -5  -4  -7    7.30    3.30
  -5  -4  -7    2.60    3.60
  -6  -4  -7   -8.90    3.40
  -6  -4  -7    2.40    2.70
   8  -5  -7   -2.80    3.30
   8  -5  -7    3.70    4.70
   7  -5  -7   14.60    4.30
   7  -5  -7   14.80    3.60
   7  -5  -7   20.80    5.20
   7  -5  -7   29.60    6.10
   6  -5  -7  137.59   10.30
   6  -5  -7  138.89   11.30
   6  -5  -7  128.29   10.00
   6  -5  -7  136.19   10.80
   5  -5  -7   -1.80    1.20
   5  -5  -7   -4.50    1.80
  -5   5   7   -2.70    2.10
   4  -5  -7   42.90    4.70
   4  -5  -7   47.10    4.20
   4  -5  -7   44.30    6.70
  -4   5   7   57.59    8.20
   3  -5  -7   24.00    2.90
   3  -5  -7   22.40    4.70
   3  -5  -7   19.80    3.30
  -3   5   7   23.70    5.20
   2  -5  -7   88.19    8.00
   2  -5  -7   93.39    6.10
  -2   5   7   85.79    6.00
  -2   5   7   90.39    8.80
   1  -5  -7  390.76   20.80
   1  -5  -7  409.06   18.40
  -1   5   7  447.96   19.50
  -1   5   7  422.76   22.10
   0  -5  -7  139.49   10.60
   0  -5  -7  134.59    9.30
   0   5   7  122.99   10.60
   0   5   7  143.79   10.40
  -1  -5  -7  218.58   14.50
  -1  -5  -7  237.88   14.10
   1   5   7  222.78   15.20
   1   5   7  220.38   15.10
  -2  -5  -7  153.48   11.80
  -2  -5  -7  169.08   11.80
   2   5   7  110.19   11.80
   2   5   7  139.49   11.50
  -3  -5  -7   55.79    7.90
  -3  -5  -7   58.69    7.90
   3   5   7   43.00    7.30
   3   5   7   36.50   10.50
  -4  -5  -7   39.50    7.00
  -4  -5  -7   47.40    8.60
  -5  -5  -7  119.39   13.60
  -5  -5  -7  162.18   12.90
   8  -6  -7   77.79    9.00
   7  -6  -7   10.60    4.30
   7  -6  -7    9.90    3.90
   7  -6  -7    7.00    3.60
   7  -6  -7   10.30    3.20
   6  -6  -7   80.09    8.50
   6  -6  -7   86.49    9.70
   6  -6  -7   87.79    7.30
   5  -6  -7  103.99    8.50
   5  -6  -7   76.49   10.60
   5  -6  -7  118.69   10.20
   5  -6  -7  110.79    7.60
  -5   6   7   97.29   10.30
   4  -6  -7  550.74   24.40
   4  -6  -7  560.74   23.40
   4  -6  -7  613.34   28.10
  -4   6   7  556.74   29.10
   3  -6  -7  107.89   11.50
   3  -6  -7  118.59    7.50
  -3   6   7  118.79   12.70
   2  -6  -7  448.76   24.10
   2  -6  -7  493.85   21.40
  -2   6   7  478.35   21.10
  -2   6   7  461.35   28.00
   1  -6  -7   87.29    8.80
   1  -6  -7   96.09    7.50
  -1   6   7   90.89    8.00
  -1   6   7   82.39    8.90
   0  -6  -7    2.00    2.50
   0  -6  -7    5.80    2.90
   0   6   7    0.10    2.30
   0   6   7    7.70    3.60
  -1  -6  -7   22.00    5.10
  -1  -6  -7   27.10    5.70
   1   6   7   25.00    5.80
   1   6   7   25.40    6.00
  -2  -6  -7  201.28   14.50
  -2  -6  -7  208.08   14.20
   2   6   7  188.18   14.40
   2   6   7  192.08   16.10
  -3  -6  -7  173.68   12.90
  -3  -6  -7  152.68   13.40
   3   6   7  134.69   14.40
  -4  -6  -7   94.29   11.20
  -4  -6  -7   78.09    9.00
  -5  -6  -7  172.18   13.60
  -5  -6  -7  140.89   17.60
   7  -7  -7   -1.20    4.10
   7  -7  -7    4.10    3.70
   7  -7  -7    9.60    5.20
   6  -7  -7    3.20    3.70
   6  -7  -7    6.10    4.80
   6  -7  -7   13.30    3.70
   5  -7  -7    9.60    3.70
   5  -7  -7   12.50    4.40
   4  -7  -7    0.40    2.90
   4  -7  -7    3.90    2.10
   4  -7  -7   -0.90    2.40
  -4   7   7   -3.30    3.40
   3  -7  -7   -4.20    2.00
   3  -7  -7    1.50    2.70
  -3   7   7    0.70    2.80
   2  -7  -7   50.99    6.10
   2  -7  -7   51.29    8.10
  -2   7   7   54.99    6.10
  -2   7   7   52.99    8.60
   1  -7  -7  185.78   13.60
   1  -7  -7  192.58   12.40
  -1   7   7  183.88   12.70
  -1   7   7  181.78   14.20
   0  -7  -7  123.39   10.00
   0  -7  -7   82.19    8.90
   0   7   7   97.19    9.80
  -1  -7  -7  320.57   19.40
  -1  -7  -7  351.66   20.30
   1   7   7  350.46   21.80
  -2  -7  -7   63.79    8.20
  -2  -7  -7   63.99    9.20
   2   7   7   71.59   11.90
  -3  -7  -7   70.19    9.40
  -3  -7  -7   51.39    8.50
  -4  -7  -7  117.79   11.80
  -4  -7  -7  153.38   15.00
   6  -8  -7    1.70    3.50
   6  -8  -7    2.60    2.50
   6  -8  -7    2.30    3.30
   5  -8  -7    8.80    4.40
   5  -8  -7    5.70    3.60
   5  -8  -7   -0.30    2.50
   4  -8  -7   10.90    2.90
   4  -8  -7    6.30    3.70
   4  -8  -7   11.20    5.00
   3  -8  -7   24.80    5.60
   3  -8  -7   33.40    6.90
  -3   8   7   35.70    6.10
   2  -8  -7  434.06   22.60
   2  -8  -7  432.66   24.50
  -2   8   7  466.25   22.90
   1  -8  -7   12.00    3.80
   1  -8  -7    6.60    3.90
  -1   8   7    3.40    3.40
   0  -8  -7  181.58   13.50
   0  -8  -7  168.38   13.90
   0   8   7  178.08   14.10
  -1  -8  -7  155.68   13.50
   1   8   7  177.18   18.20
  -2  -8  -7   13.20    4.50
  -2  -8  -7    1.50    3.60
   2   8   7    1.10    5.10
  -3  -8  -7    6.50    4.00
  -3  -8  -7    6.30    4.30
   6  -9  -7   12.60    7.40
   6  -9  -7   15.00    4.50
   6  -9  -7   27.20    7.90
   5  -9  -7   10.00    3.20
   5  -9  -7   10.10    5.50
   5  -9  -7    8.50    4.50
   4  -9  -7    3.40    4.00
   4  -9  -7    9.50    5.00
   4  -9  -7   -4.40    2.30
   3  -9  -7   -4.40    2.40
   3  -9  -7    0.50    2.20
  -3   9   7   -2.90    3.30
   2  -9  -7    1.30    3.60
   2  -9  -7   -1.80    2.50
  -2   9   7    0.90    3.30
   1  -9  -7   44.30    7.60
   1  -9  -7   40.80    8.30
  -1   9   7   27.90    7.00
   0  -9  -7   69.09   10.40
   0   9   7   77.59   14.30
  -1  -9  -7    5.80    4.60
  -1  -9  -7   -0.40    3.10
   1   9   7   -3.50    4.70
  -2  -9  -7   11.60    5.90
  -2  -9  -7   12.80    5.30
   4 -10  -7  195.68   16.10
   4 -10  -7  153.88   13.90
   3 -10  -7   52.79    9.10
   3 -10  -7   20.60    6.70
  -3  10   7   31.00    7.30
   2 -10  -7   36.50    7.60
   2 -10  -7   38.80    8.50
  -2  10   7   42.80    8.40
   1 -10  -7    1.80    3.20
   1 -10  -7    1.00    4.50
  -1  10   7   -3.80    5.30
   0 -10  -7   20.80    6.20
   0 -10  -7   15.60    5.10
   0  10   7    0.60    7.20
  -1 -10  -7    2.40    5.00
  -1 -10  -7   11.00    4.70
  -2 -12   8   24.00    6.80
  -2 -12   8   25.20    9.90
  -1 -12   8   41.60   12.80
  -1 -12   8   40.20    8.50
   0 -12   8    2.00    7.00
   1 -12   8    5.30    6.10
   1 -12   8   -0.30    5.20
   2 -12   8   54.69   11.90
  -4 -11   8   11.20    5.10
  -4 -11   8    0.40    3.70
  -4 -11   8   11.90    7.70
  -3 -11   8   56.79    9.10
  -3 -11   8   54.79   13.20
  -3 -11   8   78.99   10.90
  -2 -11   8   54.89    9.10
  -1 -11   8    1.70    4.00
  -1 -11   8   -1.10    4.50
   0 -11   8   -3.30    5.20
   0 -11   8    0.10    4.10
   1 -11   8   86.49   12.80
  -2  11  -8   29.60   10.00
   2 -11   8   30.20    8.40
   2 -11   8   47.70   11.50
  -3  11  -8   22.10    7.40
   3 -11   8    4.50    6.20
  -5 -10   8   17.10    8.50
  -5 -10   8   28.30    5.50
  -5 -10   8   25.10    4.40
  -4 -10   8   26.20    5.40
  -4 -10   8   21.90    5.00
  -3 -10   8   16.00    6.10
  -3 -10   8   20.70    8.00
  -2 -10   8   70.59    8.00
  -2 -10   8   60.99   13.00
  -2 -10   8   66.39    9.80
  -1 -10   8    3.80    3.80
  -1 -10   8   11.20    5.10
  -1 -10   8   10.90    7.10
   0 -10   8   11.10    4.90
   0 -10   8   13.60    6.90
  -1  10  -8  140.69   13.70
   1 -10   8  156.38   16.80
  -2  10  -8  156.88   14.80
   2 -10   8  114.29   14.90
  -4  10  -8   -1.00    3.10
   4 -10   8   -4.10    5.30
  -6  -9   8   16.10    6.90
  -5  -9   8    3.60    6.20
  -5  -9   8   -0.60    2.30
  -4  -9   8    4.60    2.90
  -4  -9   8    1.30    5.70
  -4  -9   8   -1.50    2.80
  -3  -9   8  268.77   15.20
  -3  -9   8  204.18   19.60
  -3  -9   8  261.47   15.80
  -2  -9   8  180.28   17.60
  -2  -9   8  173.38   13.20
  -2  -9   8  165.18   12.30
   1   9  -8  176.38   13.60
  -1  -9   8  171.28   12.90
  -1  -9   8  174.98   16.70
   0   9  -8  264.17   18.10
   0  -9   8  275.57   21.60
   0  -9   8  255.87   17.00
  -1   9  -8    1.40    3.50
   1  -9   8   -0.40    3.00
  -2   9  -8  126.89   13.20
   2  -9   8  146.69   15.60
  -3   9  -8   82.29   12.10
   3  -9   8   54.39   11.70
  -5   9  -8   82.19   13.50
   5  -9   8   71.39   13.50
  -6  -8   8   25.40    7.70
  -5  -8   8  100.39   13.20
  -5  -8   8   95.59    6.40
  -4  -8   8   13.40    3.30
  -4  -8   8   10.80    3.50
  -4  -8   8   16.10    7.10
   3   8  -8   78.49   12.60
  -3  -8   8   86.19    8.20
  -3  -8   8   96.69    7.90
  -3  -8   8   69.89   12.00
   2   8  -8   71.49   11.10
   2   8  -8   75.39    7.90
  -2  -8   8   52.99    6.40
  -2  -8   8   69.59   12.40
   1   8  -8   80.39    8.60
   1   8  -8   60.59   10.30
  -1  -8   8   60.69    6.70
  -1  -8   8   79.39   12.40
   0   8  -8  440.26   26.30
   0  -8   8  438.36   27.10
  -1   8  -8  112.29   10.90
  -1   8  -8   91.29   10.60
   1  -8   8   91.79    9.30
   1  -8   8   79.29   12.70
  -2   8  -8  150.68   13.30
   2  -8   8  128.59   13.70
  -3   8  -8  207.58   16.70
   3  -8   8  245.18   19.90
   4  -8   8   30.90    9.50
  -5   8  -8   69.49   13.80
   5  -8   8   84.79   14.50
  -7  -7   8   82.39   13.80
  -6  -7   8    0.60    4.80
  -5  -7   8   72.19   12.10
  -5  -7   8   46.90    3.80
  -5  -7   8   44.00    3.70
   4   7  -8    7.20    4.00
  -4  -7   8   13.50    3.00
  -4  -7   8   13.00    3.50
  -4  -7   8   16.40    6.30
  -3  -7   8   72.69    6.20
  -3  -7   8   36.50   10.60
  -3  -7   8   66.89    6.70
   2   7  -8   16.60    4.50
   2   7  -8   14.60    3.90
  -2  -7   8    7.40    4.30
  -2  -7   8   14.30    3.70
   1   7  -8   52.09    7.50
   1   7  -8   54.99    9.20
  -1  -7   8   45.20    8.90
  -1  -7   8   44.20    6.60
   0   7  -8  559.44   27.60
   0   7  -8  571.24   30.00
   0  -7   8  581.24   30.80
   0  -7   8  540.25   26.30
  -1   7  -8   -2.20    2.70
   1  -7   8   -0.90    2.90
  -2   7  -8  355.46   21.30
   2  -7   8  332.77   22.50
   2  -7   8  360.76   22.10
   2  -7   8  341.97   19.80
  -3   7  -8   36.40    7.50
   3  -7   8   29.40    7.60
  -4   7  -8    4.80    4.00
   4  -7   8    1.60    4.50
  -5   7  -8   47.20    9.10
   5  -7   8   34.00    9.40
  -6   7  -8   -6.60    4.20
   6  -7   8   -3.40    3.60
  -7  -6   8   12.80    5.40
  -6  -6   8   50.09    9.40
   5   6  -8   42.40    8.60
  -5  -6   8   37.30    2.60
  -5  -6   8   33.00    2.50
  -5  -6   8   32.70    7.90
   4   6  -8   27.20    6.70
  -4  -6   8   16.50    3.80
  -4  -6   8   18.10    6.50
  -4  -6   8   16.60    2.90
   3   6  -8   13.90    4.60
   3   6  -8    9.50    3.10
  -3  -6   8    8.60    4.80
  -3  -6   8   14.10    3.10
   2   6  -8   81.59    8.80
   2   6  -8   78.09    7.20
  -2  -6   8   72.39    9.50
  -2  -6   8   89.89    6.90
   1   6  -8  105.89    8.90
   1   6  -8  108.09   10.40
  -1  -6   8  107.09    8.20
  -1  -6   8  100.49   10.70
   0   6  -8  107.99    9.30
   0   6  -8   97.99    9.80
   0  -6   8  107.69    8.70
   0  -6   8  106.69   10.60
  -1   6  -8   -1.90    2.10
  -1   6  -8   -1.10    1.60
   1  -6   8   -4.00    2.40
   1  -6   8    0.50    1.90
  -2   6  -8   -0.80    2.80
   2  -6   8   -1.90    3.00
   2  -6   8    0.30    2.30
   2  -6   8    3.00    2.50
  -3   6  -8    2.30    3.10
   3  -6   8    5.00    3.90
   3  -6   8    5.80    3.40
   3  -6   8    4.70    3.30
  -4   6  -8   -4.50    2.60
   4  -6   8    0.40    2.50
  -5   6  -8   30.20    7.30
   5  -6   8   32.80    8.10
   6  -6   8   53.59   12.10
  -8  -5   8   25.20    9.40
  -7  -5   8  143.99   14.60
   6   5  -8   -3.30    3.80
  -6  -5   8    3.80    3.70
   5   5  -8  133.79   12.90
  -5  -5   8  131.89   12.50
   4   5  -8   -1.60    2.10
  -4  -5   8    0.10    2.80
  -4  -5   8    0.80    1.30
   3   5  -8    3.30    2.80
   3   5  -8   -0.50    1.20
  -3  -5   8    1.40    3.20
  -3  -5   8    3.90    2.00
   2   5  -8  169.98   12.60
   2   5  -8  160.28   10.30
  -2  -5   8  175.98   13.50
   1   5  -8   18.80    4.40
   1   5  -8   18.40    4.00
  -1  -5   8   23.10    4.20
  -1  -5   8   19.40    5.10
   0   5  -8   24.50    4.80
   0   5  -8   34.70    6.20
   0  -5   8   21.10    5.50
   0  -5   8   23.40    4.40
  -1   5  -8   11.50    3.70
  -1   5  -8   11.30    3.50
   1  -5   8    7.80    3.40
   1  -5   8   13.40    4.30
   1  -5   8   13.80    3.70
  -2   5  -8    6.40    3.30
   2  -5   8   20.20    5.40
   2  -5   8   20.40    4.50
   2  -5   8   12.80    4.80
  -3   5  -8  143.79   11.60
   3  -5   8  121.89   12.40
   3  -5   8  113.49   11.40
   3  -5   8  128.59   10.40
  -4   5  -8  119.09   11.40
   4  -5   8  141.39   14.10
   4  -5   8  141.59   13.10
  -5   5  -8   -5.00    3.40
   5  -5   8    0.80    3.90
  -6   5  -8    0.90    4.50
   6  -5   8   -7.70    3.00
  -8  -4   8  114.59   12.90
  -7  -4   8   86.89   11.00
   6   4  -8   92.79   15.40
  -6  -4   8   78.59   17.30
   5   4  -8    2.30    3.00
  -5  -4   8    1.00    2.60
   4   4  -8   24.20    5.70
   4   4  -8   23.50    3.20
  -4  -4   8   25.00    6.10
  -4  -4   8   25.10    2.70
   3   4  -8  214.78   14.20
   3   4  -8  215.98   12.40
  -3  -4   8  244.38   11.00
  -3  -4   8  185.78   13.90
   2   4  -8   12.60    2.80
   2   4  -8   11.80    3.40
  -2  -4   8    9.90    2.50
  -2  -4   8    6.70    3.60
   1   4  -8  229.38   13.10
   1   4  -8  243.28   16.50
  -1  -4   8  223.68   14.50
  -1  -4   8  258.57   13.00
   0   4  -8 1185.08   46.40
   0   4  -8 1188.38   47.70
   0  -4   8 1218.48   46.00
   0  -4   8 1161.88   48.10
  -1   4  -8   81.99    7.60
   1  -4   8   72.59    8.20
   1  -4   8   86.59    8.00
   1  -4   8   64.99    6.60
  -2   4  -8   45.90    7.00
   2  -4   8   33.30    6.70
   2  -4   8   43.00    7.10
   2  -4   8   41.40    6.30
   3  -4   8  350.26   21.90
   3  -4   8  364.26   21.20
  -4   4  -8    3.80    3.00
   4  -4   8    4.00    3.60
   4  -4   8    5.10    2.40
   4  -4   8   -2.80    2.50
  -5   4  -8  140.59   12.50
   5  -4   8  127.09   14.40
  -6   4  -8   34.40    8.50
   6  -4   8   27.70    8.70
  -7   4  -8    4.10    5.30
  -8  -3   8   96.79   12.00
   7   3  -8    6.60    6.00
  -7  -3   8   15.80    5.40
   6   3  -8    5.30    4.00
  -6  -3   8    6.50    3.40
   5   3  -8   -0.90    2.00
  -5  -3   8   -1.90    1.80
   4   3  -8  149.39    7.60
   4   3  -8  150.88   11.30
  -4  -3   8  143.79    7.20
  -4  -3   8  157.98   11.20
   3   3  -8   86.29    7.60
   3   3  -8   85.09    5.80
  -3  -3   8   81.39    5.50
   2   3  -8  165.08   10.60
   2   3  -8  162.68    9.40
  -2  -3   8  161.78   11.00
  -2  -3   8  158.88    9.00
   1   3  -8  453.45   20.90
   1   3  -8  480.35   20.50
  -1  -3   8  399.06   20.90
  -1  -3   8  450.75   21.40
   0   3  -8   46.00    5.20
   0  -3   8   65.99    5.90
   0  -3   8   42.90    5.10
   0  -3   8   51.29    6.00
  -1   3  -8  112.79    8.80
   1  -3   8  125.59    9.80
   1  -3   8  113.09    9.00
   1  -3   8  101.59    8.10
  -2   3  -8   13.00    3.70
   2  -3   8   17.10    3.90
   2  -3   8   12.10    3.60
   2  -3   8   11.40    4.10
  -3   3  -8   15.30    4.50
   3  -3   8   16.00    4.70
   3  -3   8   19.80    4.30
   3  -3   8   18.60    5.50
  -4   3  -8    2.90    2.80
   4  -3   8    7.40    3.00
   4  -3   8    6.00    3.80
   4  -3   8   10.00    3.90
  -5   3  -8  132.09   11.90
  -5   3  -8  125.79   12.80
   5  -3   8  142.09   14.50
  -6   3  -8  195.88   15.50
  -6   3  -8  167.48   16.60
   6  -3   8  200.28   18.30
  -7   3  -8   21.80    9.00
  -7   3  -8   17.00    8.50
  -8  -2   8  113.69   11.60
   7   2  -8   59.69   10.80
  -7  -2   8  106.39   10.30
   6   2  -8  526.45   28.40
  -6  -2   8  585.44   27.50
   5   2  -8  143.19    5.70
   5   2  -8  147.59   11.50
  -5  -2   8  149.69   10.60
   4   2  -8   75.69    7.30
   4   2  -8   78.19    4.90
  -4  -2   8   82.49    7.00
  -4  -2   8   73.89    4.80
   3   2  -8   44.50    3.90
   3   2  -8   35.80    4.20
  -3  -2   8   39.50    4.90
  -3  -2   8   37.20    3.60
   2   2  -8  156.08    9.10
   2   2  -8  168.68    9.70
  -2  -2   8  165.58    9.20
  -2  -2   8  161.28    9.90
   1   2  -8   33.50    3.90
   1   2  -8   37.50    4.30
  -1  -2   8   42.80    4.70
   0   2  -8  673.73   27.40
   0  -2   8  645.64   27.50
   0  -2   8  609.54   26.70
   0  -2   8  639.14   26.70
  -1   2  -8  485.15   22.70
   1  -2   8  500.55   22.50
   1  -2   8  499.05   23.50
   1  -2   8  481.05   24.90
  -2   2  -8  225.58   13.90
   2  -2   8  237.78   15.10
   2  -2   8  231.88   14.30
   2  -2   8  225.58   13.50
  -3   2  -8   46.80    7.10
  -3   2  -8   55.69    7.50
   3  -2   8   55.09    6.30
   3  -2   8   58.79    7.10
  -4   2  -8  135.99   12.40
  -4   2  -8  144.09   11.40
   4  -2   8  119.79   11.30
   4  -2   8  142.09   10.80
  -5   2  -8   23.40    6.50
  -5   2  -8   13.50    4.60
  -6   2  -8    3.20    4.00
  -6   2  -8    4.30    3.10
  -7   2  -8    7.90    7.20
  -7   2  -8    9.70    5.90
   8   1  -8   76.79   12.50
  -8  -1   8  106.39   10.80
   7   1  -8    4.00    3.90
  -7  -1   8    9.60    4.20
   6   1  -8   34.10    7.00
  -6  -1   8   50.09    5.90
   5   1  -8  211.88    9.10
   5   1  -8  202.78   13.30
  -5  -1   8  229.68   12.80
  -5  -1   8  207.98    9.50
   4   1  -8    0.90    1.10
   4   1  -8   -0.10    1.50
  -4  -1   8    2.00    1.30
  -4  -1   8    1.30    1.50
   3   1  -8   55.79    4.70
  -3  -1   8   52.39    4.50
  -3  -1   8   48.40    4.30
   2   1  -8  694.33   25.70
   2   1  -8  700.73   26.90
  -2  -1   8  606.64   25.70
  -2  -1   8  683.53   26.80
   1   1  -8  126.39    8.10
  -1  -1   8  117.09    7.40
  -1  -1   8  117.79    6.90
   0   1  -8   84.59    7.10
   0  -1   8  103.39    7.00
   0  -1   8  105.99    7.40
   0  -1   8   94.49    9.10
  -1   1  -8   49.30    5.40
   1  -1   8   52.59    5.30
   1  -1   8   46.30    5.10
   1  -1   8   50.09    5.60
  -2   1  -8    3.10    2.40
  -2   1  -8    0.70    1.80
   2  -1   8    5.70    2.80
   2  -1   8    6.90    2.50
  -3   1  -8    2.70    2.10
  -3   1  -8    0.60    2.40
   3  -1   8   -1.60    2.00
   3  -1   8   -2.60    1.60
  -4   1  -8   22.90    5.70
  -4   1  -8   29.10    6.40
   4  -1   8   26.40    6.20
   4  -1   8   30.30    5.80
  -5   1  -8  131.79   11.40
  -5   1  -8  128.29   13.00
   5  -1   8   96.99   11.00
  -6   1  -8  186.68   17.10
  -6   1  -8  196.08   15.30
  -7   1  -8   45.30    8.90
  -7   1  -8   44.80   10.40
   8   0  -8   38.30    8.70
  -8   0   8   72.39    8.40
   7   0  -8   40.70    8.10
  -7   0   8   54.59    6.70
   6   0  -8   88.29    4.70
   6   0  -8   62.39    7.60
   6   0  -8   88.79    5.20
  -6   0   8   89.69    7.80
   5   0  -8  490.05   19.10
   5   0  -8  426.66   21.70
  -5   0   8  490.45   19.90
  -5   0   8  517.55   23.50
   4   0  -8  200.08   11.50
   4   0  -8  216.98   11.00
  -4   0   8  216.18   11.00
  -4   0   8  220.48   10.40
   3   0  -8  222.68    9.70
   3   0  -8  237.58   11.60
  -3   0   8  230.88    9.50
  -3   0   8  231.68   11.80
   2   0  -8   14.40    3.00
  -2   0   8   13.90    1.50
  -2   0   8   14.70    3.10
   1   0  -8   23.60    4.00
  -1   0   8   25.00    2.80
  -1   0   8   22.40    2.40
  -1   0   8   24.10    4.00
   0   0  -8    4.80    2.20
   0   0   8    6.70    2.10
   0   0   8    4.60    1.80
   0   0   8    5.60    2.00
  -1   0  -8   84.39    7.00
  -1   0  -8   83.99    7.30
   1   0   8   81.39    6.80
   1   0   8   94.49    7.40
  -2   0  -8  317.47   17.60
  -2   0  -8  330.27   17.40
   2   0   8  339.17   17.90
   2   0   8  318.47   17.20
  -3   0  -8    0.40    1.90
  -3   0  -8    1.00    1.90
   3   0   8   -0.80    1.90
   3   0   8   -2.10    1.80
  -4   0  -8  126.69   11.70
  -4   0  -8  136.19   10.80
   4   0   8  109.49    9.90
   4   0   8  125.19   11.80
  -5   0  -8  207.78   17.00
  -5   0  -8  217.78   15.30
   5   0   8  211.58   16.80
  -6   0  -8  118.59   13.50
  -6   0  -8  128.39   12.00
   8  -1  -8   -3.30    3.90
  -8   1   8    0.20    2.90
   7  -1  -8   87.19    5.10
   7  -1  -8   77.49    8.70
   7  -1  -8   97.69    5.70
  -7   1   8   99.09    8.80
   6  -1  -8   82.09    5.70
   6  -1  -8   66.09    8.40
   6  -1  -8   91.89    6.30
  -6   1   8   88.99    7.40
   5  -1  -8  399.96   17.00
  -5   1   8  368.46   17.60
  -5   1   8  400.76   17.30
   4  -1  -8    8.00    1.80
   4  -1  -8    5.50    2.00
  -4   1   8   10.80    1.80
  -4   1   8   11.50    2.90
   3  -1  -8  134.99    8.40
  -3   1   8  127.99    8.50
   2  -1  -8  957.30   36.90
  -2   1   8  937.71   37.00
   1  -1  -8  103.19    7.40
  -1   1   8   89.69    4.90
  -1   1   8   92.49    4.80
  -1   1   8  107.99    7.80
   0  -1  -8   98.79    7.60
   0  -1  -8   94.59    6.20
   0   1   8   99.99    6.50
   0   1   8   89.79    7.50
  -1  -1  -8   16.00    3.80
  -1  -1  -8   14.30    3.40
   1   1   8   13.80    3.40
   1   1   8    6.40    2.80
  -2  -1  -8  499.45   23.60
  -2  -1  -8  496.05   23.30
   2   1   8  477.65   23.40
   2   1   8  462.45   22.90
  -3  -1  -8  725.73   33.40
  -3  -1  -8  701.13   31.90
   3   1   8  701.23   31.70
   3   1   8  747.73   33.90
  -4  -1  -8   44.50    7.30
  -4  -1  -8   61.29    8.20
   4   1   8   49.60    7.60
   4   1   8   48.10    8.90
  -5  -1  -8  263.37   19.40
  -5  -1  -8  258.07   16.90
  -6  -1  -8   42.30    8.10
  -6  -1  -8   44.80   10.10
   8  -2  -8  108.09   11.30
   8  -2  -8  122.59    7.20
  -8   2   8  158.68   12.40
   7  -2  -8   -0.20    1.70
   7  -2  -8    3.70    2.80
   7  -2  -8   -1.50    1.50
  -7   2   8    3.20    2.90
   6  -2  -8  353.26   18.20
   6  -2  -8  361.66   16.60
  -6   2   8  371.76   17.70
   5  -2  -8  699.03   27.10
   5  -2  -8  623.14   27.10
   5  -2  -8  752.82   28.50
  -5   2   8  698.93   29.60
   4  -2  -8    4.90    2.20
   4  -2  -8    9.30    1.10
  -4   2   8   11.30    3.00
   3  -2  -8    3.10    1.70
  -3   2   8    0.90    2.00
   2  -2  -8  110.39    8.10
  -2   2   8  121.59    8.80
   1  -2  -8    1.10    1.50
  -1   2   8    0.60    1.80
  -1   2   8    2.20    1.00
   0  -2  -8  405.36   17.10
   0  -2  -8  408.46   19.50
   0   2   8  359.06   19.00
   0   2   8  404.06   17.70
  -1  -2  -8  470.75   23.20
  -1  -2  -8  508.45   22.60
   1   2   8  512.35   23.10
   1   2   8  510.65   23.80
  -2  -2  -8    1.30    2.10
  -2  -2  -8   -1.60    1.70
   2   2   8   -0.70    2.00
   2   2   8    1.00    1.80
  -3  -2  -8  131.09   12.60
  -3  -2  -8  148.79   12.00
   3   2   8  148.39   12.40
  -4  -2  -8   60.99    8.70
  -4  -2  -8   59.69    9.90
   4   2   8   45.20    7.30
   4   2   8   50.09    9.30
  -5  -2  -8   -3.90    2.30
  -5  -2  -8   -1.00    3.40
  -6  -2  -8   43.30   11.20
  -6  -2  -8   43.90    8.40
   8  -3  -8   88.39    7.60
   8  -3  -8   95.09    7.20
   8  -3  -8  108.79   10.10
   8  -3  -8   89.69    9.80
   7  -3  -8   -3.60    1.60
   7  -3  -8    1.20    2.30
   7  -3  -8    4.30    2.50
   6  -3  -8  210.28   12.10
   6  -3  -8  206.18   12.00
   6  -3  -8  214.58   12.30
   6  -3  -8  222.78   13.10
   5  -3  -8   50.29    4.30
   5  -3  -8   45.30    4.20
   5  -3  -8   49.40    5.50
  -5   3   8   52.49    6.00
   4  -3  -8    6.40    2.50
  -4   3   8    0.50    1.90
   3  -3  -8   79.19    7.10
  -3   3   8   76.29    7.10
   2  -3  -8   70.59    6.70
  -2   3   8   54.09    6.20
   1  -3  -8   74.29    4.40
   1  -3  -8   71.79    7.00
  -1   3   8   72.49    4.80
  -1   3   8   68.49    6.70
   0  -3  -8   49.10    4.50
   0  -3  -8   39.30    6.00
   0   3   8   33.90    4.60
   0   3   8   47.90    6.80
  -1  -3  -8  745.83   32.70
  -1  -3  -8  768.82   31.70
   1   3   8  774.22   32.90
   1   3   8  735.23   33.00
  -2  -3  -8   21.00    4.40
  -2  -3  -8   24.70    5.30
   2   3   8   20.30    5.20
   2   3   8   16.10    4.30
  -3  -3  -8   36.20    6.30
  -3  -3  -8   33.20    6.60
   3   3   8   32.20    6.50
   3   3   8   34.70    6.90
  -4  -3  -8    0.50    2.60
  -4  -3  -8   -2.70    2.40
   4   3   8    0.30    3.70
   4   3   8   -1.90    2.80
  -5  -3  -8   38.70    8.60
  -5  -3  -8   41.60    7.60
  -6  -3  -8    0.70    3.70
  -6  -3  -8   -2.90    3.60
   8  -4  -8   14.70    4.70
   8  -4  -8    7.30    4.10
   8  -4  -8   -1.00    2.70
   8  -4  -8    7.60    4.50
   7  -4  -8    5.70    3.60
   7  -4  -8    7.00    3.20
   7  -4  -8    3.50    2.80
   6  -4  -8   17.10    3.90
   6  -4  -8    5.90    3.00
   6  -4  -8   10.40    4.30
   6  -4  -8   14.90    3.00
   5  -4  -8  283.97   13.70
   5  -4  -8  322.87   17.00
   5  -4  -8  298.87   13.50
  -5   4   8  357.86   18.80
   4  -4  -8   23.60    1.70
   4  -4  -8   29.10    5.40
  -4   4   8   26.60    5.50
   3  -4  -8   36.40    5.80
  -3   4   8   32.50    6.00
   2  -4  -8  239.48    8.80
   2  -4  -8  242.08   14.20
  -2   4   8  221.58   14.50
   1  -4  -8   71.29    7.40
   1  -4  -8   71.69    5.00
  -1   4   8   66.09    7.10
  -1   4   8   77.29    5.70
   0  -4  -8  255.37   14.30
   0  -4  -8  208.58   13.70
   0   4   8  231.68   14.70
   0   4   8  221.78   13.20
  -1  -4  -8   -1.40    2.10
  -1  -4  -8    6.70    2.50
   1   4   8    2.10    2.90
   1   4   8    0.90    1.30
  -2  -4  -8  196.98   13.50
  -2  -4  -8  219.88   14.20
   2   4   8  201.18   14.90
   2   4   8  198.08   14.00
  -3  -4  -8   11.20    3.80
  -3  -4  -8    6.30    3.50
   3   4   8    5.60    5.50
   3   4   8    8.80    3.70
  -4  -4  -8   11.60    4.50
  -4  -4  -8   17.20    5.40
  -5  -4  -8    5.80    3.90
  -5  -4  -8    0.50    3.00
   8  -5  -8   21.70    4.80
   8  -5  -8   13.40    4.10
   8  -5  -8   13.10    4.60
   7  -5  -8    2.60    3.00
   7  -5  -8    4.60    4.70
   6  -5  -8  140.19    8.90
   6  -5  -8  157.88   14.60
   6  -5  -8  140.29    9.60
   6  -5  -8  113.99   11.50
   5  -5  -8   14.30    2.60
   5  -5  -8    8.50    2.40
   5  -5  -8   12.30    3.60
  -5   5   8    4.30    3.40
   4  -5  -8    3.70    1.60
   4  -5  -8    8.80    1.70
   4  -5  -8    3.30    2.90
  -4   5   8    7.00    3.50
   3  -5  -8    1.40    1.80
   3  -5  -8    4.80    1.20
   3  -5  -8    3.60    1.00
  -3   5   8    1.10    2.60
   2  -5  -8  340.97   14.30
   2  -5  -8  365.56   19.30
  -2   5   8  335.17   14.50
  -2   5   8  346.57   19.80
   1  -5  -8    2.40    1.50
  -1   5   8    3.20    2.10
   0  -5  -8   89.89    7.30
   0  -5  -8   74.69    7.90
   0   5   8   88.69    8.10
   0   5   8   91.09    8.90
  -1  -5  -8  403.56   20.90
  -1  -5  -8  380.96   19.50
   1   5   8  331.57   20.30
   1   5   8  349.57   20.50
  -2  -5  -8   32.50    6.30
  -2  -5  -8   22.20    5.20
   2   5   8   27.80    7.10
   2   5   8   32.40    6.60
  -3  -5  -8  177.78   14.30
  -3  -5  -8  199.78   14.00
   3   5   8  144.19   15.00
  -4  -5  -8   39.90    8.60
  -4  -5  -8   50.09    8.50
  -5  -5  -8    5.90    4.40
  -5  -5  -8    0.80    5.10
   7  -6  -8   19.10    3.80
   7  -6  -8   15.70    4.60
   7  -6  -8    8.90    4.00
   6  -6  -8   22.00    4.40
   6  -6  -8   29.30    7.00
   6  -6  -8   24.90    6.20
   5  -6  -8    5.40    2.60
   5  -6  -8    5.30    1.90
   5  -6  -8    3.70    3.30
  -5   6   8    7.20    3.90
   4  -6  -8   30.60    3.30
   4  -6  -8   40.50    7.20
   4  -6  -8   25.10    3.90
  -4   6   8   28.80    6.20
   3  -6  -8    0.50    2.30
   3  -6  -8    1.20    1.50
   3  -6  -8    0.00    1.30
  -3   6   8    5.90    4.00
   2  -6  -8  809.62   36.40
   2  -6  -8  823.52   31.80
  -2   6   8  827.82   32.10
  -2   6   8  804.12   37.70
   1  -6  -8   22.60    5.20
   1  -6  -8   20.00    3.80
  -1   6   8   16.30    4.00
  -1   6   8   10.80    4.50
   0  -6  -8   15.50    4.80
   0  -6  -8   12.00    3.50
   0   6   8   17.00    5.10
   0   6   8   16.10    5.00
  -1  -6  -8  542.75   27.40
  -1  -6  -8  558.64   26.80
   1   6   8  542.75   28.50
  -2  -6  -8   17.00    4.60
  -2  -6  -8   14.20    5.00
   2   6   8    3.60    5.10
  -3  -6  -8  114.09   10.90
  -3  -6  -8  133.79   12.20
   3   6   8   88.99   16.40
  -4  -6  -8   42.00    9.30
  -4  -6  -8   39.60    7.10
   7  -7  -8   10.30    5.30
   7  -7  -8    3.50    3.80
   7  -7  -8   12.80    3.40
   6  -7  -8  103.79   10.70
   6  -7  -8   66.59    7.40
   5  -7  -8   39.90    4.20
   5  -7  -8   32.70    6.80
   5  -7  -8   25.80    6.30
   4  -7  -8   20.90    3.60
   4  -7  -8   23.30    6.00
   3  -7  -8   30.30    6.40
   3  -7  -8   35.40    4.00
   2  -7  -8   23.70    5.70
   2  -7  -8   35.80    4.50
  -2   7   8   28.60    4.90
   1  -7  -8  257.47   14.70
   1  -7  -8  274.17   17.40
  -1   7   8  256.47   15.50
   0  -7  -8    4.10    3.70
   0  -7  -8    4.10    2.30
   0   7   8   -1.60    2.80
  -1  -7  -8  508.55   26.70
  -1  -7  -8  503.65   25.80
   1   7   8  484.35   27.50
  -2  -7  -8   23.00    5.20
  -2  -7  -8   22.80    5.70
   2   7   8   30.70    8.20
  -3  -7  -8   18.80    5.90
  -3  -7  -8   29.10    6.90
  -4  -7  -8   72.59   11.90
   6  -8  -8   31.90    6.00
   6  -8  -8   23.80    4.30
   6  -8  -8   29.30    7.30
   5  -8  -8   88.59    8.60
   5  -8  -8   91.49   10.60
   4  -8  -8   41.00    6.40
   4  -8  -8   67.29    5.90
   4  -8  -8   58.39    9.30
   3  -8  -8   25.10    4.80
   3  -8  -8   25.80    6.70
   2  -8  -8    3.90    2.50
   2  -8  -8    0.00    3.50
  -2   8   8    3.40    2.90
   1  -8  -8   79.69    7.80
   1  -8  -8   62.19    9.80
  -1   8   8   46.90    7.50
   0  -8  -8   14.80    4.80
   0  -8  -8    6.10    3.80
   0   8   8   12.00    4.90
  -1  -8  -8    2.10    3.00
  -1  -8  -8   -2.20    2.80
   1   8   8    5.50    6.00
  -2  -8  -8    0.40    3.40
  -2  -8  -8    9.80    4.90
  -3  -8  -8    1.50    4.70
  -3  -8  -8    9.30    5.30
   5  -9  -8  119.39    8.70
   5  -9  -8   85.79    9.90
   5  -9  -8  102.49   11.70
   4  -9  -8    0.10    4.10
   4  -9  -8   -2.50    2.10
   3  -9  -8   -3.70    2.90
  -3   9   8   -3.60    3.40
   2  -9  -8    1.10    3.30
   2  -9  -8    4.00    4.60
  -2   9   8    6.00    4.40
   1  -9  -8   15.60    4.60
  -1   9   8    9.30    4.90
   0  -9  -8   19.40    6.30
  -1  -9  -8    8.50    4.70
  -1  -9  -8    6.30    4.10
   1   9   8    3.10    6.40
  -2  -9  -8   40.00    8.40
  -2  -9  -8   39.00    7.90
   3 -10  -8   28.50    6.40
   3 -10  -8   21.30    7.00
  -3  10   8   16.20    6.30
   2 -10  -8   66.39    8.60
   2 -10  -8   45.90    9.30
  -2  10   8   72.39    9.20
   1 -10  -8   11.20    4.30
   1 -10  -8    3.60    4.90
   0 -10  -8   34.30    9.90
   0 -10  -8    8.10    3.90
   0  10   8   -9.50    6.20
  -1 -12   9   92.49   12.90
  -1 -12   9   67.59   14.60
   0 -12   9   -3.70    4.60
   0 -12   9    4.00    5.20
   1 -12   9   59.09   11.00
  -3 -11   9    8.90    7.20
  -3 -11   9    1.40    5.60
  -3 -11   9    6.80    5.00
  -2 -11   9   -3.50    3.70
  -2 -11   9   -1.70    4.80
  -1 -11   9   -2.80    7.00
   0 -11   9   -3.20    4.40
   0 -11   9    9.30    5.30
  -1  11  -9   11.70    6.60
   1 -11   9   -1.10    4.40
  -2  11  -9   31.10    8.50
   2 -11   9   20.30    9.50
  -5 -10   9   99.09    8.10
  -4 -10   9    1.10    3.50
  -4 -10   9   -2.40    3.80
  -4 -10   9   -5.50    3.60
  -3 -10   9    9.20    6.90
  -3 -10   9   32.40    6.20
  -3 -10   9   38.00    7.00
  -2 -10   9   91.59   15.40
  -2 -10   9  101.99   10.50
  -2 -10   9   98.79   10.50
  -1 -10   9   32.60    7.30
  -1 -10   9   37.90    9.80
   0  10  -9   20.10    6.30
   0 -10   9   33.90   10.10
  -1  10  -9   74.09   11.80
   1 -10   9   56.89   11.60
  -2  10  -9  146.99   14.60
   2 -10   9  125.79   15.30
  -3  10  -9   -2.10    4.50
   3 -10   9   -4.80    4.90
  -4  10  -9   42.00   11.30
   4 -10   9   31.30   10.70
  -5  -9   9  170.98   10.60
  -5  -9   9  204.98   22.70
  -4  -9   9  149.49   10.10
  -4  -9   9  153.58   17.40
  -3  -9   9   69.69    8.10
  -3  -9   9   63.99   12.30
  -3  -9   9   78.49    7.90
  -2  -9   9    2.10    3.30
  -2  -9   9   -1.90    5.10
   1   9  -9    3.30    3.30
  -1  -9   9    5.40    3.90
  -1  -9   9    4.20    5.10
   0   9  -9    7.90    4.10
   0  -9   9    3.20    4.70
   0  -9   9    3.20    4.10
  -1   9  -9  155.98   13.80
   1  -9   9  140.79   15.80
  -2   9  -9  283.47   20.10
   2  -9   9  285.37   22.60
  -3   9  -9  198.88   17.10
   3  -9   9  173.88   17.90
  -4   9  -9  337.37   24.00
   4  -9   9  320.87   25.70
  -6  -8   9   28.90   10.30
  -5  -8   9  108.69   14.20
  -5  -8   9  110.59    7.00
  -4  -8   9   17.50    3.70
  -4  -8   9   20.70    7.10
  -4  -8   9   11.40    3.50
   3   8  -9   16.10    7.10
  -3  -8   9   15.30    4.40
  -3  -8   9   23.40    4.50
  -3  -8   9   15.60    6.70
   2   8  -9   -0.30    3.50
   2   8  -9   -1.30    2.10
  -2  -8   9    7.30    3.20
  -2  -8   9    5.40    4.90
   1   8  -9   42.70    7.30
   1   8  -9   32.70    7.80
  -1  -8   9   27.30    7.60
  -1  -8   9   31.80    6.40
   0   8  -9   25.20    5.90
   0   8  -9   12.80    4.70
   0  -8   9   22.70    7.60
   0  -8   9   13.10    4.70
  -1   8  -9   94.69   10.20
  -1   8  -9   82.49   14.00
   1  -8   9   84.39   13.60
   1  -8   9   77.49    8.30
  -2   8  -9   66.99   10.10
   2  -8   9   72.99   12.90
  -3   8  -9   22.40    6.70
   3  -8   9   20.30    7.60
  -4   8  -9   85.59   12.40
   4  -8   9   86.79   14.50
  -5   8  -9   36.90    9.10
   5  -8   9   15.40    8.10
  -6  -7   9   37.10    9.00
  -5  -7   9   32.30    3.30
  -5  -7   9   39.00    8.70
  -5  -7   9   32.40    3.50
   4   7  -9   14.00    5.30
  -4  -7   9   14.10    3.40
  -4  -7   9   15.60    6.40
  -4  -7   9   12.00    3.40
   3   7  -9   93.79    8.40
   3   7  -9  104.39   12.10
  -3  -7   9  105.99   13.00
  -3  -7   9   96.09    7.60
   2   7  -9   67.39    7.20
   2   7  -9   64.39   10.50
  -2  -7   9   60.39   10.50
  -2  -7   9   77.99    7.00
   1   7  -9    4.30    3.00
   1   7  -9   -2.10    1.80
  -1  -7   9    0.10    1.80
  -1  -7   9   -1.50    2.90
   0   7  -9   90.69   10.40
   0   7  -9   88.79    9.20
   0  -7   9   88.69   14.40
   0  -7   9   88.59    8.30
  -1   7  -9  321.47   19.80
  -1   7  -9  325.67   21.30
   1  -7   9  327.47   18.70
   1  -7   9  321.97   22.00
  -2   7  -9   31.90    6.80
   2  -7   9   25.50    6.70
   2  -7   9   30.20    7.70
   2  -7   9   28.10    7.00
  -3   7  -9   19.90    5.80
   3  -7   9   12.80    5.80
  -4   7  -9  208.88   17.10
   4  -7   9  237.18   20.20
  -5   7  -9    2.30    6.20
   5  -7   9   -4.30    4.30
  -7  -6   9  117.29   13.30
  -6  -6   9   55.29   10.30
   5   6  -9   15.30    5.20
  -5  -6   9   16.60    2.40
  -5  -6   9   11.50    1.90
  -5  -6   9    9.40    5.10
   4   6  -9  138.59   13.20
  -4  -6   9  163.58    8.90
  -4  -6   9  192.48   16.30
   3   6  -9  430.66   24.70
   3   6  -9  440.86   20.50
  -3  -6   9  460.15   19.70
  -3  -6   9  380.96   24.80
   2   6  -9  183.28   14.10
   2   6  -9  173.08   11.80
  -2  -6   9  178.48   14.90
  -2  -6   9  176.48   10.90
   1   6  -9    6.80    3.10
   1   6  -9    3.90    2.80
  -1  -6   9   -1.20    2.80
  -1  -6   9    7.00    2.60
   0   6  -9  133.09   11.60
   0   6  -9  140.69   11.20
   0  -6   9  136.99   10.20
   0  -6   9  113.59   11.60
  -1   6  -9   56.19    9.10
  -1   6  -9   52.69    9.60
   1  -6   9   66.69    8.80
   1  -6   9   72.99    8.10
   1  -6   9   54.39    9.50
  -2   6  -9   63.59    9.50
   2  -6   9   73.79    7.80
   2  -6   9   81.49    9.30
   2  -6   9   59.59    9.80
  -3   6  -9   45.70    8.40
   3  -6   9   34.60    8.20
   3  -6   9   27.40    7.40
  -4   6  -9    9.80    4.40
   4  -6   9   -0.60    4.20
  -5   6  -9    3.60    3.90
   5  -6   9   -1.90    4.90
  -6   6  -9   67.49   11.50
   6  -6   9   53.39   12.20
  -7  -5   9    3.00    4.60
   6   5  -9   86.99   11.30
  -6  -5   9   88.19   10.50
   5   5  -9   -2.00    2.50
  -5  -5   9    0.10    1.00
  -5  -5   9   -0.50    0.80
  -5  -5   9   -6.10    2.30
   4   5  -9   -0.20    1.40
   4   5  -9    1.20    2.30
  -4  -5   9   -1.20    1.00
  -4  -5   9    1.60    3.30
   3   5  -9  178.28   13.60
   3   5  -9  178.98   10.60
  -3  -5   9  172.68    9.70
  -3  -5   9  152.48   13.50
   2   5  -9    2.30    1.70
   2   5  -9    0.50    2.20
  -2  -5   9    2.40    1.50
  -2  -5   9    4.60    3.30
   1   5  -9  470.35   24.60
   1   5  -9  463.55   22.70
  -1  -5   9  490.05   22.30
  -1  -5   9  503.25   25.70
   0   5  -9   13.80    4.00
   0   5  -9   10.80    3.50
   0  -5   9   13.40    3.20
   0  -5   9   20.70    5.50
  -1   5  -9   52.49    7.80
   1  -5   9   44.70    7.70
   1  -5   9   46.00    8.20
   1  -5   9   45.40    6.80
  -2   5  -9  773.82   34.80
   2  -5   9  773.12   35.50
   2  -5   9  726.03   33.20
   2  -5   9  707.23   36.00
  -3   5  -9  129.49   11.60
   3  -5   9  109.19   11.00
   3  -5   9  118.19   12.20
   3  -5   9  110.19    9.80
  -4   5  -9  378.66   23.00
   4  -5   9  385.76   25.40
  -5   5  -9   26.40    6.70
   5  -5   9    9.30    6.20
  -6   5  -9   -1.30    4.70
   6  -5   9   -4.20    5.00
  -8  -4   9   41.70    9.00
   7   4  -9   66.19   11.40
  -7  -4   9   63.99    8.70
   6   4  -9   62.69   10.30
  -6  -4   9   60.89    8.30
   5   4  -9    1.40    2.60
  -5  -4   9    3.10    2.50
  -5  -4   9    0.80    0.80
   4   4  -9   16.10    4.30
   4   4  -9    9.90    2.60
  -4  -4   9   11.60    4.30
  -4  -4   9    9.00    2.00
   3   4  -9    0.50    1.50
   3   4  -9   -1.10    1.70
  -3  -4   9    1.10    1.10
  -3  -4   9   -1.30    3.00
   2   4  -9 1035.10   40.80
   2   4  -9 1058.19   43.20
  -2  -4   9  996.20   40.00
  -2  -4   9 1117.69   44.40
   1   4  -9  126.99    9.90
   1   4  -9  129.69    9.20
  -1  -4   9  117.19    8.50
  -1  -4   9  110.09    9.70
   0   4  -9  418.86   21.20
   0   4  -9  454.05   22.60
   0  -4   9  451.15   21.10
   0  -4   9  425.26   22.70
  -1   4  -9   98.19    8.90
   1  -4   9  108.59    8.80
   1  -4   9   98.19    9.60
   1  -4   9   98.39    8.80
  -2   4  -9  157.28   11.90
   2  -4   9  145.69   10.90
   2  -4   9  149.69   12.00
   2  -4   9  133.29   12.00
  -3   4  -9   77.29    8.50
   3  -4   9   63.49   11.30
   3  -4   9   75.29    7.90
   3  -4   9   93.89   10.60
  -4   4  -9   -1.50    3.00
   4  -4   9   -3.60    1.90
  -5   4  -9  192.68   15.80
   5  -4   9  199.68   18.10
  -6   4  -9   12.90    5.80
   6  -4   9   16.30    6.70
  -8  -3   9    6.40    3.80
   7   3  -9   89.79   11.80
  -7  -3   9   89.59   10.20
   6   3  -9  138.19   12.70
  -6  -3   9  149.99   12.10
   5   3  -9    4.80    1.20
   5   3  -9   10.80    4.00
  -5  -3   9    6.90    3.50
  -5  -3   9    4.00    1.20
   4   3  -9    8.00    3.20
   4   3  -9    8.20    2.10
  -4  -3   9    5.30    1.70
  -4  -3   9    5.50    3.10
   3   3  -9   43.30    4.40
   3   3  -9   41.50    5.40
  -3  -3   9   38.90    6.40
  -3  -3   9   46.80    4.30
   2   3  -9  186.98   10.80
   2   3  -9  202.38   11.90
  -2  -3   9  162.68   11.30
  -2  -3   9  194.18   12.40
   1   3  -9  946.81   37.90
   1   3  -9  931.81   37.30
  -1  -3   9  915.11   36.80
  -1  -3   9  951.40   38.60
   0   3  -9    3.40    2.00
   0  -3   9    9.20    2.70
   0  -3   9    6.80    2.70
  -1   3  -9  313.27   17.10
   1  -3   9  301.77   16.90
   1  -3   9  296.47   16.30
   1  -3   9  301.07   17.70
  -2   3  -9   39.10    6.50
   2  -3   9   51.39    8.30
   2  -3   9   58.19    7.80
   2  -3   9   54.39    6.90
  -3   3  -9  137.69   11.20
   3  -3   9  105.09   11.00
   3  -3   9  117.89   11.00
   3  -3   9  109.79    9.50
  -4   3  -9   61.39    9.00
   4  -3   9   64.29   10.90
   4  -3   9   53.09    9.50
  -5   3  -9   44.80    8.40
   5  -3   9   43.10    9.80
  -6   3  -9   11.10    5.40
   6  -3   9   16.80    7.60
   8   2  -9    5.80    5.20
  -8  -2   9    1.60    3.50
   7   2  -9   33.00    7.70
  -7  -2   9   31.40    6.50
   6   2  -9   49.90    6.80
  -6  -2   9   51.09    6.40
   5   2  -9   71.99    7.80
   5   2  -9   65.69    4.20
  -5  -2   9   63.59    4.30
  -5  -2   9   71.59    7.10
   4   2  -9    9.10    2.70
   4   2  -9   12.30    2.60
  -4  -2   9    7.10    2.80
  -4  -2   9    8.70    2.00
   3   2  -9  178.58    9.70
   3   2  -9  173.98   10.50
  -3  -2   9  182.28   11.00
  -3  -2   9  181.48    9.80
   2   2  -9   26.80    4.20
   2   2  -9   26.50    3.60
  -2  -2   9   34.40    5.10
   1   2  -9  595.44   25.30
  -1  -2   9  565.84   24.20
  -1  -2   9  570.04   25.10
  -1  -2   9  603.04   25.10
   0   2  -9  251.37   14.10
   0  -2   9  259.97   14.10
   0  -2   9  251.77   13.70
   0  -2   9  256.37   14.40
  -1   2  -9   54.79    6.30
   1  -2   9   51.99    6.40
   1  -2   9   52.59    5.90
   1  -2   9   50.19    5.60
  -2   2  -9  196.78   12.90
   2  -2   9  183.18   13.50
   2  -2   9  161.58   11.60
   2  -2   9  193.48   13.00
  -3   2  -9    7.00    3.30
   3  -2   9    8.80    3.10
   3  -2   9    2.10    3.00
   3  -2   9    6.70    3.60
  -4   2  -9  162.88   14.30
  -4   2  -9  191.18   13.90
   4  -2   9  157.38   13.80
   4  -2   9  174.38   13.00
  -5   2  -9   11.70    4.10
  -5   2  -9    6.70    4.80
  -6   2  -9    5.30    4.20
  -6   2  -9    0.00    4.00
   8   1  -9    0.80    4.10
  -8  -1   9    5.80    4.00
   7   1  -9    0.40    3.60
  -7  -1   9   -3.10    2.10
   6   1  -9   68.89    3.20
   6   1  -9   64.09    7.50
  -6  -1   9   58.49    6.80
   5   1  -9   11.00    3.30
   5   1  -9    6.90    1.80
  -5  -1   9   11.20    3.20
  -5  -1   9    6.90    2.00
   4   1  -9   65.89    5.70
   4   1  -9   56.99    5.40
  -4  -1   9   61.19    5.20
  -4  -1   9   58.19    5.00
   3   1  -9   25.40    3.20
   3   1  -9   29.40    4.20
  -3  -1   9   28.60    4.10
  -3  -1   9   30.60    3.30
   2   1  -9    0.20    1.40
  -2  -1   9    2.10    1.50
  -2  -1   9    0.90    1.60
   1   1  -9   67.99    6.00
  -1  -1   9   60.49    4.80
  -1  -1   9   53.89    5.50
  -1  -1   9   61.39    5.30
   0   1  -9  958.80   38.20
   0  -1   9  917.01   37.80
   0  -1   9  958.00   36.70
  -1   1  -9   -0.90    1.60
   1  -1   9    0.90    1.90
   1  -1   9   -0.10    2.10
  -2   1  -9   32.90    6.10
  -2   1  -9   21.20    4.90
   2  -1   9   34.90    6.00
   2  -1   9   26.90    5.30
  -3   1  -9   59.39    7.70
  -3   1  -9   61.19    8.60
   3  -1   9   62.99    7.80
   3  -1   9   59.99    8.20
  -4   1  -9    5.00    3.00
  -4   1  -9    9.20    4.50
   4  -1   9    8.80    4.00
   4  -1   9    4.40    3.00
  -5   1  -9   84.19    9.80
  -5   1  -9   91.29   11.70
  -6   1  -9   26.90    7.40
  -6   1  -9   26.60    9.50
  -8   0   9   -0.90    3.00
   7   0  -9   19.60    5.70
  -7   0   9   27.10    5.20
   6   0  -9   39.50    3.40
   6   0  -9   45.00    4.20
  -6   0   9   45.80    5.50
   5   0  -9   58.39    5.70
  -5   0   9   51.29    5.00
  -5   0   9   53.69    5.00
   4   0  -9  161.68    9.00
   4   0  -9  153.78    8.10
  -4   0   9  150.08    9.20
  -4   0   9  150.88    7.60
   3   0  -9   50.39    4.80
  -3   0   9   48.30    2.60
   2   0  -9    7.40    2.50
  -2   0   9    8.70    1.40
  -2   0   9   10.00    2.70
   1   0  -9  921.11   36.10
  -1   0   9  903.11   32.60
  -1   0   9  869.51   35.70
  -1   0   9  882.51   33.10
   0   0  -9  222.18   13.10
   0   0   9  218.98   11.40
   0   0   9  222.18   11.90
   0   0   9  209.38   12.60
  -1   0  -9   16.20    3.80
  -1   0  -9   14.50    4.00
   1   0   9   20.70    4.40
   1   0   9   18.50    4.00
  -2   0  -9   68.29    7.30
  -2   0  -9   68.59    7.40
   2   0   9   67.79    7.20
   2   0   9   72.09    7.60
  -3   0  -9   56.09    8.80
  -3   0  -9   52.99    7.80
   3   0   9   55.79    7.80
   3   0   9   58.49    7.30
  -4   0  -9  282.97   17.70
  -4   0  -9  299.87   19.80
   4   0   9  299.77   19.90
   4   0   9  282.07   19.20
  -5   0  -9  162.28   13.60
  -5   0  -9  152.98   14.80
  -6   0  -9   21.50    7.90
  -6   0  -9   31.00    7.40
   8  -1  -9   -1.60    4.10
  -8   1   9   25.10    5.90
   7  -1  -9  420.66   16.90
   7  -1  -9  407.86   17.40
  -7   1   9  423.26   21.10
   6  -1  -9   10.00    2.40
   6  -1  -9    3.90    2.30
  -6   1   9   12.40    3.10
   5  -1  -9   30.10    3.70
   5  -1  -9   27.30    4.30
  -5   1   9   30.20    3.30
  -5   1   9   36.40    5.20
   4  -1  -9  175.98   10.20
  -4   1   9  174.08   10.70
   3  -1  -9  105.69    7.50
  -3   1   9   92.59    7.40
   2  -1  -9   52.39    5.50
  -2   1   9   51.39    5.50
   1  -1  -9  202.38   12.10
  -1   1   9  229.48   12.90
  -1   1   9  203.68    9.00
  -1   1   9  198.88    9.10
   0  -1  -9  152.28   10.50
   0  -1  -9  151.38    8.80
   0   1   9  159.98   10.70
   0   1   9  154.88    9.00
  -1  -1  -9   13.00    3.30
  -1  -1  -9    9.90    3.30
   1   1   9   12.90    3.50
   1   1   9   18.10    4.00
  -2  -1  -9  351.56   19.50
  -2  -1  -9  354.86   19.10
   2   1   9  365.56   19.40
   2   1   9  322.77   18.50
  -3  -1  -9   13.60    4.50
  -3  -1  -9   17.50    5.00
   3   1   9   17.00    4.60
   3   1   9   27.90    6.10
  -4  -1  -9    9.60    4.30
  -4  -1  -9   16.70    4.40
   4   1   9   23.30    6.10
  -5  -1  -9    6.80    5.40
  -5  -1  -9    5.10    3.70
  -6  -1  -9   12.00    5.90
  -6  -1  -9   13.60    6.50
   8  -2  -9   -4.80    3.40
  -8   2   9    1.40    3.40
   7  -2  -9  220.98   14.60
   7  -2  -9  277.17   12.80
   6  -2  -9   91.69    7.70
   6  -2  -9   58.69    6.00
   6  -2  -9   82.29    6.50
  -6   2   9   77.59    7.30
   5  -2  -9    0.60    1.10
   5  -2  -9    3.70    2.10
   5  -2  -9    1.30    1.40
  -5   2   9    0.50    2.20
   4  -2  -9  116.49    8.30
  -4   2   9  105.89    8.70
   3  -2  -9  221.58   12.70
  -3   2   9  220.48   13.10
   2  -2  -9  106.39    8.30
  -2   2   9  107.59    8.50
   1  -2  -9    4.50    2.30
  -1   2   9    7.10    1.80
  -1   2   9    7.90    1.60
  -1   2   9    9.70    3.30
   0  -2  -9    4.50    1.80
   0  -2  -9    2.40    2.40
   0   2   9    1.20    1.40
   0   2   9    4.20    2.30
  -1  -2  -9  342.47   17.20
  -1  -2  -9  339.57   18.40
   1   2   9  346.97   17.80
   1   2   9  326.27   18.30
  -2  -2  -9  110.89    9.70
  -2  -2  -9  131.09   10.40
   2   2   9  127.39   10.40
   2   2   9  109.69    9.80
  -3  -2  -9   -2.10    1.80
  -3  -2  -9   -2.60    2.10
   3   2   9   -0.60    1.70
   3   2   9   -2.90    2.60
  -4  -2  -9  169.78   14.20
  -4  -2  -9  184.48   13.60
   4   2   9  148.79   13.90
  -5  -2  -9   24.10    6.80
  -5  -2  -9   17.40    5.50
  -6  -2  -9   -6.10    4.10
  -6  -2  -9   -3.90    4.40
   8  -3  -9    3.90    3.50
   8  -3  -9   -7.40    2.90
   8  -3  -9   -2.30    2.00
   8  -3  -9   -3.80    2.60
   7  -3  -9   -0.10    2.10
   7  -3  -9   -0.30    2.60
   7  -3  -9    0.30    2.50
   6  -3  -9   16.90    3.90
   6  -3  -9   10.40    3.10
   6  -3  -9   12.90    2.90
  -6   3   9   10.80    3.90
   5  -3  -9   13.00    3.70
   5  -3  -9   12.60    0.90
  -5   3   9   10.20    4.00
   4  -3  -9    2.90    2.50
  -4   3   9    9.40    3.40
   3  -3  -9   -0.50    1.90
  -3   3   9   -2.20    2.10
   2  -3  -9  186.28   12.00
  -2   3   9  163.88   11.80
   1  -3  -9  253.77   10.90
   1  -3  -9  281.47   15.70
  -1   3   9  278.77   15.90
  -1   3   9  257.77   11.50
   0  -3  -9    9.70    3.60
   0  -3  -9   10.90    2.70
   0   3   9   13.00    3.40
   0   3   9    7.90    3.20
  -1  -3  -9   25.30    4.60
  -1  -3  -9   19.00    5.50
   1   3   9   28.60    7.00
   1   3   9   22.20    5.20
  -2  -3  -9  222.58   14.50
  -2  -3  -9  240.88   15.10
   2   3   9  229.98   15.50
   2   3   9  214.38   14.70
  -3  -3  -9    3.40    3.10
  -3  -3  -9   11.10    4.20
   3   3   9    5.50    4.60
  -4  -3  -9    6.60    3.80
  -4  -3  -9   -0.20    3.00
  -5  -3  -9    2.80    3.90
  -5  -3  -9    8.60    4.70
   8  -4  -9   57.79    7.40
   8  -4  -9   53.99    7.30
   8  -4  -9   59.19    7.40
   8  -4  -9   58.99    6.80
   7  -4  -9   78.79    7.70
   7  -4  -9  103.59    9.00
   7  -4  -9  104.09    8.50
   7  -4  -9   80.19    8.90
   6  -4  -9   20.80    3.50
   6  -4  -9   22.70    3.50
   6  -4  -9   34.70    5.70
  -6   4   9   11.80    4.50
   5  -4  -9  188.18   12.40
  -5   4   9  184.28   13.20
   4  -4  -9   60.09    6.80
  -4   4   9   80.29    8.00
   3  -4  -9  242.28   14.80
  -3   4   9  237.68   15.40
   2  -4  -9    1.50    2.60
  -2   4   9    3.90    2.20
   1  -4  -9  197.48    9.40
   1  -4  -9  168.88   14.20
  -1   4   9  202.78   14.10
  -1   4   9  189.18    9.90
   0  -4  -9   18.40    4.70
   0  -4  -9   21.90    4.00
   0   4   9   24.50    5.10
   0   4   9   20.10    5.30
  -1  -4  -9  145.79   11.30
  -1  -4  -9  142.59   10.20
   1   4   9  153.18   12.00
   1   4   9  116.39   11.00
  -2  -4  -9   13.80    4.40
  -2  -4  -9    3.90    3.40
   2   4   9   20.80    5.50
  -3  -4  -9  121.69   11.40
  -3  -4  -9  118.79   10.80
   3   4   9  119.79   13.10
  -4  -4  -9   35.80    7.80
  -4  -4  -9   42.40    8.30
  -5  -4  -9    3.00    4.60
  -5  -4  -9    5.10    5.00
   7  -5  -9   -2.00    2.00
   7  -5  -9   -6.70    3.00
   7  -5  -9    1.60    2.40
   7  -5  -9   -5.00    2.20
   6  -5  -9   15.20    3.10
   6  -5  -9   24.50    3.20
   6  -5  -9   17.10    5.20
   6  -5  -9    9.90    4.30
   5  -5  -9   86.39    8.30
  -5   5   9   71.39   10.10
   4  -5  -9   82.19    8.20
  -4   5   9   79.49   10.70
   3  -5  -9  181.08   12.90
  -3   5   9  201.48   14.50
   2  -5  -9   33.10    2.50
   2  -5  -9   32.00    6.20
  -2   5   9   44.00    7.30
  -2   5   9   33.90    2.80
   1  -5  -9  173.58   12.70
   1  -5  -9  170.88    9.10
  -1   5   9  145.49    9.30
  -1   5   9  151.38   12.60
   0  -5  -9  424.96   19.70
   0  -5  -9  428.46   22.50
   0   5   9  376.96   22.40
   0   5   9  416.16   20.90
  -1  -5  -9  147.09   10.90
  -1  -5  -9  130.69   11.30
   1   5   9  153.88   12.60
  -2  -5  -9  459.15   23.70
  -2  -5  -9  447.66   23.20
   2   5   9  333.37   23.10
  -3  -5  -9  119.69   11.10
  -3  -5  -9  132.19   11.90
   3   5   9   86.79   13.70
  -4  -5  -9    8.80    4.60
  -4  -5  -9    1.40    4.40
   7  -6  -9   -3.00    2.60
   7  -6  -9    5.20    4.20
   6  -6  -9   26.10    3.50
   6  -6  -9   23.90    3.80
   6  -6  -9   31.00    6.10
   5  -6  -9    1.80    3.10
   5  -6  -9    4.40    1.40
   5  -6  -9    0.30    1.20
   4  -6  -9  446.96   23.90
   3  -6  -9  117.99    5.50
   3  -6  -9  110.39    5.40
   3  -6  -9  113.39   10.60
  -3   6   9  122.19   13.10
   2  -6  -9    4.80    1.60
   2  -6  -9   -0.10    3.10
  -2   6   9    4.60    1.90
   1  -6  -9   18.90    5.30
   1  -6  -9   28.20    3.70
  -1   6   9   17.70    4.10
   0  -6  -9  155.78   10.60
   0  -6  -9  160.28   12.90
   0   6   9  140.99   11.70
  -1  -6  -9   38.70    6.40
  -1  -6  -9   36.30    7.40
   1   6   9   34.00    8.10
  -2  -6  -9   36.70    7.30
  -3  -6  -9   44.40    8.10
  -3  -6  -9   58.39    9.70
  -4  -6  -9  131.89   13.70
  -4  -6  -9  113.69   12.10
   6  -7  -9   18.20    6.00
   6  -7  -9   15.80    2.70
   5  -7  -9   11.80    4.50
   5  -7  -9   14.30    2.60
   4  -7  -9  110.89    6.60
   4  -7  -9  125.49    6.60
   4  -7  -9  134.39   12.10
   3  -7  -9   75.89    5.50
   3  -7  -9   74.09    5.30
   3  -7  -9   73.09   10.30
   2  -7  -9  115.89   11.20
  -2   7   9   97.59    7.70
   1  -7  -9   16.00    5.10
   1  -7  -9   15.90    3.70
   0  -7  -9   26.10    4.90
   0  -7  -9   19.80    5.90
   0   7   9   30.40    6.60
  -1  -7  -9   93.59    9.60
  -1  -7  -9   98.29   10.90
   1   7   9  103.59   11.30
  -2  -7  -9   77.49   11.20
  -2  -7  -9  116.69   11.20
   2   7   9   93.99   14.70
  -3  -7  -9   39.50    8.10
  -3  -7  -9   46.10    8.30
   6  -8  -9   19.20    4.70
   5  -8  -9   11.00    5.30
   5  -8  -9    1.50    3.30
   5  -8  -9    7.00    2.00
   4  -8  -9   30.00    6.90
   4  -8  -9   30.00    6.80
   4  -8  -9   30.40    3.70
   3  -8  -9    8.50    2.50
   3  -8  -9   11.40    5.30
   2  -8  -9   31.00    7.30
   2  -8  -9   37.10    4.90
   1  -8  -9    7.50    3.10
   1  -8  -9    3.70    4.10
  -1   8   9   -0.90    3.60
   0  -8  -9    0.60    2.50
   0  -8  -9   -1.50    2.30
   0   8   9   -1.60    4.10
  -1  -8  -9   24.00    6.20
  -1  -8  -9   34.10    7.20
   1   8   9   43.50    8.70
  -2  -8  -9   12.20    4.80
  -2  -8  -9    5.30    4.60
   4  -9  -9    3.00    4.40
   4  -9  -9    3.00    2.30
   3  -9  -9   17.10    3.90
   3  -9  -9    2.20    4.70
   2  -9  -9  155.88   11.10
   2  -9  -9  143.09   13.70
   1  -9  -9   -0.70    4.40
   1  -9  -9    1.90    2.70
  -1   9   9  -11.30    4.10
   0  -9  -9   21.70    6.60
  -1  -9  -9   70.19   11.30
  -1  -9  -9   82.89    9.40
  -3 -11  10   10.60    5.20
  -3 -11  10   16.90   10.40
  -2 -11  10   19.90    6.00
  -2 -11  10    8.20    7.80
  -1 -11  10   -9.00    3.30
  -1 -11  10    7.50    5.20
   0  11 -10   -0.90    4.00
   0 -11  10    1.80    4.30
   0 -11  10    2.90    6.60
  -1  11 -10   -4.10    3.80
   1 -11  10   -2.30    5.30
  -2  11 -10    6.10    5.70
   2 -11  10    1.30    5.70
  -4 -10  10   34.60   11.00
  -4 -10  10   48.00    6.90
  -4 -10  10   43.20    6.40
  -3 -10  10    9.80    4.70
  -3 -10  10   22.00    5.00
  -3 -10  10    7.70    6.80
  -2 -10  10   77.79   11.30
  -2 -10  10   85.99    9.90
  -2 -10  10   78.09   15.20
   1  10 -10   -1.10    2.60
  -1 -10  10    3.20    5.90
   0  10 -10   71.49   10.80
   0 -10  10   31.20    8.80
  -1  10 -10    6.80    5.60
   1 -10  10   -1.90    4.50
  -2  10 -10   57.59   13.20
   2 -10  10   48.00   11.00
  -3  10 -10   -5.30    4.60
   3 -10  10    0.60    6.40
  -5  -9  10   -1.10    3.10
  -5  -9  10   -3.30    2.90
  -4  -9  10    1.90    3.10
  -4  -9  10   -0.80    3.70
  -4  -9  10    8.50    3.40
  -3  -9  10    8.10    6.00
  -3  -9  10    6.10    3.60
  -3  -9  10    0.20    3.10
   2   9 -10  122.29   11.00
  -2  -9  10   98.99   15.90
  -2  -9  10  117.19   10.20
   1   9 -10   88.29   11.60
  -1  -9  10   94.09   12.30
  -1  -9  10   98.49    9.40
   0   9 -10   18.50    5.90
   0  -9  10   13.40    6.20
  -1   9 -10   25.40    6.50
   1  -9  10   31.90    9.80
  -2   9 -10   33.80    7.60
   2  -9  10   32.60    8.60
  -3   9 -10    9.50    4.20
  -4   9 -10   -0.60    5.00
   4  -9  10    4.10    5.90
  -6  -8  10    1.30    6.10
  -5  -8  10   23.40    4.00
  -5  -8  10   34.10    9.20
  -5  -8  10   26.30    3.80
  -4  -8  10    7.30    4.70
  -4  -8  10    9.20    3.70
  -4  -8  10    5.00    2.80
   3   8 -10    3.80    2.80
  -3  -8  10    6.40    5.20
  -3  -8  10    5.40    3.00
   2   8 -10   10.10    4.20
   2   8 -10    8.40    3.60
  -2  -8  10   -1.60    2.70
  -2  -8  10    4.40    5.70
   1   8 -10   38.50    8.50
   1   8 -10   43.30    7.40
  -1  -8  10   35.70    8.80
  -1  -8  10   33.20    6.80
   0   8 -10   66.59   12.50
   0   8 -10   77.99   10.80
   0  -8  10   65.99    7.50
   0  -8  10   82.19   10.80
  -1   8 -10    8.50    4.50
   1  -8  10   23.40    6.70
  -2   8 -10   62.79   10.70
   2  -8  10   61.79   12.50
  -3   8 -10   60.69   10.50
   3  -8  10   55.69   11.10
  -4   8 -10   99.99   13.80
   4  -8  10   88.89   15.00
  -6  -7  10   24.10    7.30
  -5  -7  10   14.70    5.60
  -5  -7  10   13.40    2.70
  -5  -7  10   12.20    3.20
   4   7 -10   45.70    9.50
  -4  -7  10   59.59    6.30
  -4  -7  10   51.79   10.10
  -4  -7  10   69.39    5.80
   3   7 -10   58.29    9.30
   3   7 -10   43.40    6.70
  -3  -7  10   37.20    9.00
  -3  -7  10   48.10    6.40
   2   7 -10  446.06   22.80
  -2  -7  10  472.75   32.70
  -2  -7  10  429.26   21.40
   1   7 -10   -4.20    2.20
  -1  -7  10    1.70    2.40
   0   7 -10    7.10    3.90
   0   7 -10   -0.20    2.40
   0  -7  10   -2.60    2.20
   0  -7  10    3.90    4.00
  -1   7 -10  150.08   13.70
  -1   7 -10  142.39   12.70
   1  -7  10  152.28   14.60
   1  -7  10  164.28   14.00
   1  -7  10  130.19   11.10
  -2   7 -10   61.99    9.70
   2  -7  10   68.39   11.20
  -3   7 -10   26.40    6.80
   3  -7  10   33.10    9.00
  -4   7 -10    4.90    5.00
   4  -7  10    9.80    6.00
  -5   7 -10   16.50    6.60
   5  -7  10    3.30    5.20
  -7  -6  10    6.40    5.10
  -6  -6  10   30.00    7.70
   5   6 -10   -0.90    3.40
  -5  -6  10   -2.30    1.40
  -5  -6  10   -0.80    1.40
  -5  -6  10   -0.70    3.30
   4   6 -10   35.90    7.10
   4   6 -10   39.80    5.40
  -4  -6  10   38.90    4.30
  -4  -6  10   48.90    9.40
   3   6 -10   36.10    5.80
   3   6 -10   43.80    8.30
  -3  -6  10   25.90    7.30
  -3  -6  10   40.00    5.50
   2   6 -10   57.09    9.50
   2   6 -10   61.49    6.80
  -2  -6  10   60.79   10.50
  -2  -6  10   70.19    6.70
   1   6 -10  983.40   43.90
   1   6 -10  975.90   41.50
  -1  -6  10  994.70   45.00
  -1  -6  10  989.70   40.50
   0   6 -10   58.19    8.40
   0   6 -10   52.79    8.90
   0  -6  10   65.49    7.20
   0  -6  10   56.19    9.30
  -1   6 -10    5.10    3.30
   1  -6  10   11.40    3.70
   1  -6  10    8.10    4.70
  -2   6 -10    6.60    4.00
   2  -6  10    2.90    3.60
   2  -6  10    7.70    3.70
  -3   6 -10    8.30    4.20
   3  -6  10    7.90    5.00
  -4   6 -10   -2.20    3.10
   4  -6  10    4.10    4.60
  -5   6 -10   28.00    8.20
   5  -6  10   11.40    7.50
  -7  -5  10   74.29   11.60
   6   5 -10   -2.70    4.10
  -6  -5  10    3.70    4.30
   5   5 -10    2.00    3.10
  -5  -5  10   -0.60    3.50
  -5  -5  10   -0.70    1.30
  -5  -5  10    0.80    1.40
   4   5 -10  128.29    8.50
   4   5 -10  125.49   11.90
  -4  -5  10  143.39   12.90
  -4  -5  10  130.79    7.80
   3   5 -10  125.39    8.90
   3   5 -10  125.29   10.90
  -3  -5  10  134.99    8.40
  -3  -5  10   97.69   10.70
   2   5 -10  117.99   10.60
   2   5 -10  145.09   10.10
  -2  -5  10  134.19   12.20
  -2  -5  10  143.29    9.50
   1   5 -10   17.00    4.80
   1   5 -10   16.00    4.00
  -1  -5  10   20.20    4.60
  -1  -5  10   15.20    5.40
   0   5 -10    8.80    3.60
   0   5 -10    8.50    3.60
   0  -5  10    4.80    3.20
   0  -5  10    8.30    3.00
  -1   5 -10   -0.30    2.00
   1  -5  10    6.90    4.00
   1  -5  10    2.80    2.60
   1  -5  10    6.10    3.20
  -2   5 -10  362.36   21.10
   2  -5  10  331.77   22.50
   2  -5  10  368.66   20.20
  -3   5 -10   22.10    5.90
   3  -5  10   29.00    6.70
   3  -5  10   25.70    7.00
  -4   5 -10   18.20    5.50
   4  -5  10   18.60    6.20
  -5   5 -10   -2.70    4.40
   5  -5  10    4.40    5.10
  -6   5 -10    1.10    5.80
  -8  -4  10   24.60    7.10
   7   4 -10   -2.60    5.10
  -7  -4  10    3.70    4.60
   6   4 -10    9.40    4.20
  -6  -4  10    7.90    3.80
   5   4 -10   88.99    5.40
   5   4 -10   85.59    9.40
  -5  -4  10   91.39    5.20
  -5  -4  10   79.79    8.60
   4   4 -10  184.58   13.20
   4   4 -10  170.38    9.80
  -4  -4  10  165.98    9.20
  -4  -4  10  176.78   13.30
   3   4 -10    4.70    2.00
   3   4 -10    7.10    3.00
  -3  -4  10    1.30    2.90
  -3  -4  10    2.50    1.80
   2   4 -10   46.10    6.30
   2   4 -10   51.69    6.40
  -2  -4  10   49.10    5.20
  -2  -4  10   46.00    7.40
   1   4 -10  595.34   27.50
   1   4 -10  648.64   28.90
  -1  -4  10  604.34   29.20
  -1  -4  10  624.24   27.20
   0   4 -10   16.60    4.10
   0  -4  10    9.00    4.10
   0  -4  10   16.60    3.40
   0  -4  10   13.40    3.70
  -1   4 -10  229.28   15.00
   1  -4  10  251.87   14.80
   1  -4  10  223.38   15.00
   1  -4  10  224.48   15.90
  -2   4 -10   66.39    7.70
   2  -4  10   62.09    9.70
   2  -4  10   70.39    8.20
   2  -4  10   60.39    7.10
  -3   4 -10   83.29    9.30
   3  -4  10   89.99   10.90
   3  -4  10   97.99   10.40
  -4   4 -10   29.30    6.80
   4  -4  10   15.10    5.50
  -5   4 -10   21.80    6.20
   5  -4  10   16.70    6.90
  -6   4 -10   22.10    7.20
   6  -4  10   28.00    9.40
  -8  -3  10    4.60    4.00
   7   3 -10   61.09   12.30
  -7  -3  10   59.59    9.40
   6   3 -10   48.50    8.60
  -6  -3  10   64.79    7.70
   5   3 -10    6.40    1.80
   5   3 -10    4.80    3.50
  -5  -3  10    2.50    1.50
  -5  -3  10    3.80    3.50
   4   3 -10  593.04   24.60
   4   3 -10  602.94   28.50
  -4  -3  10  633.54   28.00
  -4  -3  10  616.04   24.40
   3   3 -10   79.59    7.20
   3   3 -10   86.09    6.70
  -3  -3  10   88.19    8.60
   2   3 -10    7.20    2.60
   2   3 -10    9.10    2.80
  -2  -3  10   18.00    4.30
  -2  -3  10   17.60    3.50
   1   3 -10   -0.60    1.70
   1   3 -10    1.20    1.90
  -1  -3  10    1.40    1.70
  -1  -3  10    0.20    2.40
   0   3 -10  185.98   12.40
   0  -3  10  199.88   13.20
   0  -3  10  183.88   12.00
   0  -3  10  186.78   12.10
  -1   3 -10   76.39    7.80
   1  -3  10   62.09    7.80
   1  -3  10   77.19    7.60
   1  -3  10   63.09    6.70
  -2   3 -10    7.00    3.20
   2  -3  10   15.60    4.20
   2  -3  10   17.00    5.30
   2  -3  10   19.40    5.00
  -3   3 -10   -0.20    3.10
   3  -3  10    3.00    2.90
   3  -3  10    0.60    2.80
   3  -3  10    0.60    2.00
  -4   3 -10   32.00    7.10
   4  -3  10   32.00    7.90
  -5   3 -10   31.00    7.30
   5  -3  10   25.10    7.80
  -6   3 -10  218.18   17.90
   6  -3  10  235.68   21.80
   8   2 -10  -10.10    4.20
  -8  -2  10    4.90    4.10
   7   2 -10    2.20    4.20
  -7  -2  10   13.10    4.00
   6   2 -10    7.50    4.20
  -6  -2  10   13.10    4.40
   5   2 -10  384.26   16.20
  -5  -2  10  380.36   16.30
  -5  -2  10  406.16   19.50
   4   2 -10   83.99    6.30
   4   2 -10   98.39    7.90
  -4  -2  10   96.39    6.70
  -4  -2  10   93.39    7.30
   3   2 -10  161.88    9.90
   3   2 -10  176.28   10.20
  -3  -2  10  162.48   10.30
  -3  -2  10  174.08   10.20
   2   2 -10  561.04   23.30
   2   2 -10  527.55   23.80
  -2  -2  10  533.75   23.70
  -2  -2  10  561.74   24.00
   1   2 -10  234.08   13.80
  -1  -2  10  259.87   14.30
  -1  -2  10  244.68   12.90
  -1  -2  10  244.68   13.80
   0   2 -10  110.99    8.70
   0  -2  10  104.29    7.90
   0  -2  10   96.19    8.20
   0  -2  10   91.49    8.10
  -1   2 -10  255.87   15.70
   1  -2  10  262.87   15.40
   1  -2  10  270.87   16.30
   1  -2  10  265.17   15.40
  -2   2 -10   30.20    5.90
   2  -2  10   30.70    6.00
   2  -2  10   28.60    5.40
   2  -2  10   37.00    6.80
  -3   2 -10   81.09    8.70
   3  -2  10   73.89    7.90
   3  -2  10   80.69   10.90
  -4   2 -10   38.20    7.60
   4  -2  10   34.90    8.60
  -5   2 -10   13.50    5.70
  -5   2 -10   14.90    6.40
  -6   2 -10   12.70    5.80
  -6   2 -10   21.70    7.40
  -8  -1  10   31.70    8.60
   7   1 -10   24.30    6.20
  -7  -1  10   33.90    6.30
   6   1 -10    6.90    1.70
   6   1 -10    5.20    2.80
  -6  -1  10    2.80    2.40
   5   1 -10   41.30    5.20
  -5  -1  10   44.50    4.40
  -5  -1  10   46.30    5.20
   4   1 -10  112.49    7.50
   4   1 -10  103.39    7.10
  -4  -1  10  102.89    6.70
  -4  -1  10  116.59    7.80
   3   1 -10   65.19    4.90
   3   1 -10   63.19    5.80
  -3  -1  10   69.29    6.20
  -3  -1  10   71.99    4.90
   2   1 -10   78.09    6.90
  -2  -1  10   82.59    5.90
  -2  -1  10   79.79    5.30
  -2  -1  10   89.09    7.20
   1   1 -10  656.63   28.00
  -1  -1  10  650.43   25.50
  -1  -1  10  628.24   26.20
  -1  -1  10  616.24   27.50
   0   1 -10  240.58   14.30
   0  -1  10  242.08   13.00
   0  -1  10  265.37   14.70
   0  -1  10  228.28   13.40
  -1   1 -10   47.80    7.10
   1  -1  10   56.79    6.50
   1  -1  10   46.30    6.10
   1  -1  10   58.19    6.00
  -2   1 -10    9.90    3.60
   2  -1  10   11.10    4.20
   2  -1  10   15.50    4.10
   2  -1  10   14.90    3.80
  -3   1 -10   10.00    3.80
  -3   1 -10   16.10    4.90
   3  -1  10    9.60    5.10
   3  -1  10    9.10    3.40
  -4   1 -10   18.00    5.50
  -4   1 -10   15.00    4.70
  -5   1 -10   -3.30    3.80
  -5   1 -10    3.70    3.90
  -6   1 -10   67.09   10.80
  -6   1 -10   51.59   11.10
   8   0 -10   -6.80    4.00
  -8   0  10   -1.10    3.70
   7   0 -10   -4.80    2.50
   7   0 -10    1.20    0.90
   7   0 -10    0.90    1.10
  -7   0  10    2.30    2.90
   6   0 -10    9.30    3.20
  -6   0  10    6.80    2.60
  -6   0  10   10.80    3.00
   5   0 -10   77.09    6.10
   5   0 -10   85.49    6.20
  -5   0  10   80.69    5.60
  -5   0  10   86.89    6.90
   4   0 -10   46.80    5.00
   4   0 -10   50.69    3.30
  -4   0  10   56.99    5.50
  -4   0  10   49.90    3.10
   3   0 -10  374.76   17.80
  -3   0  10  367.66   17.90
   2   0 -10   21.10    4.10
  -2   0  10   14.30    1.60
  -2   0  10   21.30    4.10
   1   0 -10  129.59    9.40
  -1   0  10  132.99    7.60
  -1   0  10  121.49    9.30
  -1   0  10  128.99    7.20
   0   0 -10  101.99    8.70
   0   0  10   89.59    7.90
   0   0  10   93.49    6.90
  -1   0 -10  265.07   15.50
   1   0  10  262.07   15.10
   1   0  10  241.98   14.20
   1   0  10  240.28   15.00
  -2   0 -10  209.08   13.90
  -2   0 -10  172.78   12.90
   2   0  10  205.98   13.60
   2   0  10  198.58   13.40
  -3   0 -10    4.30    3.20
  -3   0 -10   10.50    3.60
   3   0  10    8.40    3.70
   3   0  10    9.70    4.00
  -4   0 -10   10.10    4.90
  -4   0 -10    6.90    3.60
  -5   0 -10    6.60    4.90
  -5   0 -10    2.30    3.00
  -6   0 -10   10.00    6.40
  -6   0 -10    5.80    5.00
   8  -1 -10   78.29   11.00
  -8   1  10  123.39    9.80
   7  -1 -10   38.30    7.40
   7  -1 -10   46.80    4.60
  -7   1  10   47.30    6.00
   6  -1 -10    1.70    1.60
   6  -1 -10   -1.20    1.70
  -6   1  10   -0.70    1.60
   5  -1 -10   15.40    2.10
   5  -1 -10   20.70    3.70
  -5   1  10   22.80    4.30
   4  -1 -10  500.25   22.60
  -4   1  10  521.75   23.50
   3  -1 -10  341.27   17.10
  -3   1  10  344.87   17.60
   2  -1 -10  182.78   11.60
  -2   1  10  183.68   11.80
   1  -1 -10  129.69    9.50
  -1   1  10  118.99    9.30
  -1   1  10  113.19    6.40
  -1   1  10  120.09    6.30
   0  -1 -10  132.39   10.30
   0   1  10  146.89   10.80
   0   1  10  145.79    8.90
   0   1  10  150.78    9.30
  -1  -1 -10   -1.10    1.70
   1   1  10   -0.40    1.80
  -2  -1 -10    4.40    2.50
  -2  -1 -10    9.10    3.50
   2   1  10   11.10    3.90
   2   1  10    8.90    3.30
  -3  -1 -10    4.20    3.10
  -3  -1 -10   -1.20    2.50
   3   1  10    8.40    4.10
  -4  -1 -10   15.90    5.10
  -4  -1 -10   18.90    6.20
  -5  -1 -10    2.60    4.20
  -5  -1 -10    5.00    4.40
   8  -2 -10   28.10    5.80
   8  -2 -10   14.40    3.30
   8  -2 -10   16.70    4.70
   8  -2 -10   24.80    3.70
   7  -2 -10   49.80    5.80
   7  -2 -10   38.10    6.00
   7  -2 -10   47.50    5.10
   6  -2 -10   -0.50    1.80
   6  -2 -10    1.90    2.10
   6  -2 -10    6.00    1.60
  -6   2  10    6.90    3.00
   5  -2 -10  133.09    9.20
  -5   2  10  115.09    9.50
   4  -2 -10  141.59    9.70
  -4   2  10  121.89    9.90
   3  -2 -10  121.59    9.10
  -3   2  10  106.29    9.00
   2  -2 -10   32.00    5.50
  -2   2  10   35.20    5.70
   1  -2 -10    3.80    1.90
  -1   2  10    4.40    2.80
  -1   2  10    2.70    1.10
   0  -2 -10    3.30    1.90
   0  -2 -10    4.00    2.40
   0   2  10    7.80    3.60
   0   2  10    9.10    2.80
  -1  -2 -10   51.59    7.50
  -1  -2 -10   55.69    6.10
   1   2  10   62.29    6.60
   1   2  10   59.49    7.00
  -2  -2 -10  426.86   23.10
  -2  -2 -10  463.65   23.30
   2   2  10  469.45   24.00
   2   2  10  408.76   22.90
  -3  -2 -10   12.00    4.20
  -3  -2 -10    4.60    6.40
  -4  -2 -10   17.50    5.40
  -4  -2 -10   17.10    5.70
  -5  -2 -10   -5.30    3.80
  -5  -2 -10   -0.90    3.30
   8  -3 -10   15.30    3.70
   8  -3 -10   13.30    3.50
   8  -3 -10    4.40    3.80
   8  -3 -10   19.70    4.60
   7  -3 -10    2.80    2.80
   7  -3 -10   -3.70    2.00
   6  -3 -10   -1.00    1.90
   6  -3 -10   -0.60    0.80
  -6   3  10   -6.30    2.50
   5  -3 -10   -1.90    2.10
  -5   3  10   -1.20    2.90
   4  -3 -10  322.97   17.60
  -4   3  10  336.67   18.80
   3  -3 -10    9.50    3.30
  -3   3  10   17.30    4.30
   2  -3 -10   48.50    7.00
  -2   3  10   58.19    6.70
  -1   3  10   82.39    5.10
  -1   3  10   79.79   11.20
   0  -3 -10  261.57   15.60
   0   3  10  205.28   12.90
   0   3  10  243.68   15.50
  -1  -3 -10  205.18   14.30
  -1  -3 -10  206.38   12.80
   1   3  10  225.08   14.40
   1   3  10  211.48   14.60
  -2  -3 -10    5.00    2.80
  -2  -3 -10   -0.20    2.00
   2   3  10    0.60    3.00
  -3  -3 -10   21.70    5.40
  -3  -3 -10   24.50    5.50
   3   3  10   22.60    6.60
  -4  -3 -10    7.50    4.50
  -4  -3 -10    8.80    4.50
  -5  -3 -10    1.60    5.00
   7  -4 -10   29.60    4.00
   7  -4 -10   21.20    5.20
   7  -4 -10   20.00    3.60
   7  -4 -10   34.70    6.90
   6  -4 -10   53.09    7.40
  -6   4  10   51.39    8.70
   5  -4 -10    1.50    2.70
  -5   4  10   10.50    4.30
   3  -4 -10    2.40    2.30
  -3   4  10    7.70    3.20
   2  -4 -10   58.79    8.10
  -2   4  10   69.69    8.10
   1  -4 -10  147.59    7.40
   1  -4 -10  149.88   11.80
  -1   4  10  131.69   11.60
  -1   4  10  142.29    8.00
   0  -4 -10    7.60    2.60
   0  -4 -10   12.20    4.10
   0   4  10    6.30    3.20
   0   4  10    4.00    3.30
  -1  -4 -10   49.99    8.10
  -1  -4 -10   49.40    5.90
   1   4  10   39.00    7.00
  -2  -4 -10   16.00    5.00
  -2  -4 -10   10.30    4.50
   2   4  10   16.50    6.20
  -3  -4 -10   10.30    4.20
  -3  -4 -10   12.40    4.70
   3   4  10    4.90    5.80
  -4  -4 -10   60.89   10.20
  -4  -4 -10   65.79   10.80
   7  -5 -10   40.40    3.90
   7  -5 -10   43.80    8.30
   7  -5 -10   39.00    6.80
   6  -5 -10  198.98   13.60
  -6   5  10  174.28   14.70
   5  -5 -10  117.79   10.30
  -5   5  10  118.29   11.10
   4  -5 -10   -1.10    2.20
  -4   5  10    0.60    3.30
   3  -5 -10  310.77   18.20
  -3   5  10  266.67   18.30
   2  -5 -10    3.10    3.10
  -2   5  10    6.30    4.20
   1  -5 -10   -0.80    1.90
   1  -5 -10   -0.60    1.30
  -1   5  10    2.20    1.90
   0  -5 -10  267.07   14.40
   0  -5 -10  270.87   17.50
   0   5  10  287.77   16.30
  -1  -5 -10    1.10    3.10
  -1  -5 -10   -0.10    2.00
   1   5  10    6.50    4.70
  -2  -5 -10  128.69   11.20
  -2  -5 -10  150.68   12.80
   2   5  10  115.19   13.10
  -3  -5 -10   -5.00    2.70
  -4  -5 -10   15.90    5.20
  -4  -5 -10   28.10    8.10
   7  -6 -10   -2.00    4.00
   6  -6 -10   86.79    9.60
   5  -6 -10   85.69    9.10
   4  -6 -10   59.69    9.00
   3  -6 -10   20.30    5.60
   2  -6 -10    0.90    0.90
   2  -6 -10    0.30    2.90
  -2   6  10   -0.30    1.40
   1  -6 -10   -1.90    2.60
  -1   6  10   -1.10    2.40
   0  -6 -10   -1.70    1.60
   0  -6 -10    1.50    2.30
   0   6  10    3.80    3.40
  -1  -6 -10   21.60    5.00
  -1  -6 -10   14.60    5.50
   1   6  10   21.60    6.50
  -2  -6 -10  102.19   10.00
  -2  -6 -10  104.29   10.50
   2   6  10   90.59   13.70
  -3  -6 -10  127.29   12.40
  -3  -6 -10  131.69   12.70
   6  -7 -10   -4.20    3.10
   5  -7 -10   67.39   10.10
   4  -7 -10    0.70    3.30
   3  -7 -10    7.90    4.40
   3  -7 -10    3.20    0.70
   2  -7 -10    4.50    1.80
   2  -7 -10   -2.30    3.30
  -2   7  10   -2.00    1.90
   1  -7 -10   77.79   10.80
   1  -7 -10   92.39    7.20
  -1   7  10   77.59    7.70
   0  -7 -10    4.80    2.50
   0  -7 -10   -2.10    2.00
   0   7  10   -1.00    3.80
  -1  -7 -10    6.40    2.90
   1   7  10   -4.30    4.90
  -2  -7 -10    3.30    3.60
  -2  -7 -10   -1.20    3.40
   2   7  10   -2.50    5.30
   5  -8 -10   -1.30    3.80
   4  -8 -10   83.99   12.10
   3  -8 -10   65.49   12.50
   3  -8 -10   94.89    6.10
   3  -8 -10   98.79    6.00
   2  -8 -10   11.60    5.40
   2  -8 -10   21.10    3.60
  -2   8  10   17.40    4.50
   1  -8 -10    6.30    2.50
   1  -8 -10   -0.30    3.40
  -1   8  10    0.50    4.10
   0  -8 -10    1.40    2.90
   0  -8 -10   10.00    5.10
   0   8  10    7.90    4.70
  -1  -8 -10   61.69    8.00
  -1  -8 -10   55.79    9.80
   1   8  10   47.10    8.90
   3  -9 -10   32.20    4.20
   3  -9 -10   24.50    5.90
   3  -9 -10   21.60    6.60
   2  -9 -10   25.10    7.00
   2  -9 -10   23.30    4.30
   1  -9 -10    5.80    3.70
  -1   9  10    6.80    6.10
  -2 -11  11    1.90    6.90
  -2 -11  11   -1.50    4.40
  -1 -11  11   23.30    9.60
  -1 -11  11   42.40    8.40
   0  11 -11   -3.40    3.90
   0 -11  11    8.80    7.40
  -1  11 -11   29.20    8.10
   1 -11  11   17.10    8.90
  -4 -10  11   11.10    8.20
  -4 -10  11   15.90    6.70
  -3 -10  11  278.27   18.40
  -3 -10  11  290.07   17.50
  -2 -10  11    0.50    3.90
  -2 -10  11    1.30    5.30
   1  10 -11   75.79   11.90
  -1 -10  11   60.59   12.80
   0  10 -11   31.80    8.10
   0 -10  11   14.10    7.40
   1 -10  11   12.20    8.10
  -2  10 -11   52.09   10.50
   2 -10  11   40.10   10.30
  -5  -9  11   17.70    4.60
  -5  -9  11   28.60    5.10
  -5  -9  11   40.30   12.70
  -4  -9  11    8.50    3.60
  -4  -9  11    1.60    6.30
  -4  -9  11   -3.50    3.00
  -3  -9  11  191.28   20.00
  -3  -9  11  256.37   18.80
   2   9 -11   17.80    5.50
  -2  -9  11   20.80    4.80
  -2  -9  11   13.90    7.00
   1   9 -11   38.40    8.10
  -1  -9  11   24.00    7.90
   0   9 -11    3.00    4.10
   0  -9  11    0.90    4.90
  -1   9 -11   15.10    5.40
   1  -9  11    6.90    6.00
   2  -9  11   25.80    8.60
  -3   9 -11    7.70    5.20
   3  -9  11    7.90    7.50
  -5  -8  11    3.10    5.30
  -5  -8  11   -4.70    2.30
  -4  -8  11   89.29    8.50
  -4  -8  11   91.29    7.50
  -4  -8  11   87.29   14.40
   3   8 -11   30.40    6.30
  -3  -8  11   31.70    5.30
  -3  -8  11   33.20    9.00
   2   8 -11    4.20    3.30
  -2  -8  11   -1.40    4.40
  -2  -8  11    1.40    3.20
   1   8 -11   26.50    6.00
  -1  -8  11   10.50    4.10
  -1  -8  11   10.60    5.80
   0   8 -11   13.70    5.40
   0  -8  11   25.20    8.00
  -1   8 -11   24.60    6.70
   1  -8  11   28.00    7.70
  -2   8 -11  130.49   12.90
   2  -8  11  131.19   14.90
  -3   8 -11    2.30    3.30
   3  -8  11   -7.50    4.00
  -4   8 -11   41.10    9.20
   4  -8  11   18.20    7.60
  -6  -7  11   14.50    6.30
  -5  -7  11   18.20    6.40
  -5  -7  11   16.90    3.00
  -5  -7  11   13.30    4.30
   4   7 -11    2.00    2.70
   4   7 -11    1.70    3.50
  -4  -7  11    0.60    2.20
  -4  -7  11   -4.30    3.80
   3   7 -11   38.10    8.60
   3   7 -11   35.40    6.10
  -3  -7  11   33.10    5.30
  -3  -7  11   26.20    7.90
   2   7 -11   43.00    7.10
   2   7 -11   49.20    9.00
  -2  -7  11   56.19    6.60
  -2  -7  11   62.09   11.20
   1   7 -11    0.20    3.70
   1   7 -11    6.80    3.20
  -1  -7  11    5.10    3.30
  -1  -7  11   -0.10    3.80
   0   7 -11   16.40    5.40
   0   7 -11   22.70    6.30
   0  -7  11   29.30    7.40
   0  -7  11   30.60    6.10
  -1   7 -11  195.18   14.80
   1  -7  11  144.59   14.90
   1  -7  11  164.38   14.90
  -2   7 -11    7.40    4.80
   2  -7  11   12.10    5.50
  -3   7 -11    1.10    3.80
   3  -7  11   -2.10    2.90
  -4   7 -11  281.17   21.50
   4  -7  11  293.07   24.50
  -7  -6  11   -1.00    4.80
  -6  -6  11    1.40    4.00
   5   6 -11    0.80    2.90
  -5  -6  11   -3.30    3.30
  -5  -6  11   -0.20    1.60
   4   6 -11    9.60    5.80
   4   6 -11   16.50    3.60
  -4  -6  11   15.10    3.30
  -4  -6  11   17.50   10.70
   3   6 -11   34.10    5.80
   3   6 -11   41.10    7.70
  -3  -6  11   25.60    7.20
  -3  -6  11   45.00    6.00
   2   6 -11  127.79   10.10
   2   6 -11  112.89   11.10
  -2  -6  11  112.69    9.00
  -2  -6  11  121.99   12.70
   1   6 -11  221.18   16.00
   1   6 -11  223.28   14.80
  -1  -6  11  213.58   13.60
  -1  -6  11  204.78   16.70
   0   6 -11  344.87   20.40
   0   6 -11  376.86   22.30
   0  -6  11  333.97   22.10
   0  -6  11  352.76   19.60
  -1   6 -11    5.10    2.80
   1  -6  11   -0.20    2.60
   1  -6  11    0.60    3.00
   1  -6  11   11.00    3.80
  -2   6 -11   10.80    5.00
   2  -6  11    9.80    5.50
   2  -6  11   13.50    5.90
  -3   6 -11   49.99    9.00
   3  -6  11   35.70    8.90
   4  -6  11  102.89   13.90
  -5   6 -11   60.79   11.00
   5  -6  11   66.59   13.50
  -7  -5  11   -4.00    3.80
   6   5 -11   40.90    8.90
  -6  -5  11   39.60    8.00
   5   5 -11   13.10    2.70
   5   5 -11   26.70    6.10
  -5  -5  11   16.30    5.50
  -5  -5  11   15.40    2.80
   4   5 -11    6.70    2.20
   4   5 -11    1.00    2.90
  -4  -5  11    6.50    3.90
   3   5 -11  300.77   18.10
   3   5 -11  283.57   15.50
  -3  -5  11  297.77   14.80
  -3  -5  11  227.18   17.50
   2   5 -11   17.20    4.40
   2   5 -11   21.30    5.40
  -2  -5  11   16.00    5.20
  -2  -5  11   23.60    4.40
   1   5 -11  100.69    9.60
   1   5 -11   86.19    8.70
  -1  -5  11  115.99    9.10
  -1  -5  11   98.79   10.40
   0   5 -11   20.30    6.40
   0  -5  11    2.90    3.60
   0  -5  11    4.90    3.10
  -1   5 -11   14.60    4.70
   1  -5  11   16.50    5.20
   1  -5  11   22.00    5.50
   1  -5  11   16.30    4.80
  -2   5 -11   38.10    7.60
   2  -5  11   29.10    6.80
   2  -5  11   45.30    9.00
  -3   5 -11   31.20    7.00
   3  -5  11   36.90    9.00
  -4   5 -11    0.10    3.50
   4  -5  11    2.30    3.70
  -5   5 -11   -0.90    3.90
   5  -5  11    4.80    5.80
   7   4 -11  148.09   14.30
  -7  -4  11  108.09   11.40
   6   4 -11   12.10    5.30
  -6  -4  11   22.80    5.40
   5   4 -11   26.80    3.80
   5   4 -11   34.40    6.50
  -5  -4  11   29.00    3.40
  -5  -4  11   27.00    5.80
   4   4 -11   -2.60    2.60
   4   4 -11    3.50    2.20
  -4  -4  11    3.70    2.40
  -4  -4  11    5.40    4.30
   3   4 -11   10.50    3.30
   3   4 -11   -0.80    2.10
  -3  -4  11   -0.60    2.60
  -3  -4  11    5.40    2.60
   2   4 -11  353.16   19.10
   2   4 -11  331.77   18.00
  -2  -4  11  385.06   20.60
  -2  -4  11  344.17   17.70
   1   4 -11   88.19    8.60
   1   4 -11   91.59    8.60
  -1  -4  11  108.49    9.80
  -1  -4  11   95.59    8.10
   0   4 -11   10.60    4.00
   0  -4  11   12.70    3.80
   0  -4  11   19.30    4.40
   0  -4  11   10.30    4.10
  -1   4 -11   74.49    8.50
   1  -4  11   49.50    8.80
   1  -4  11   65.39    8.90
   1  -4  11   62.59    7.50
  -2   4 -11    3.00    3.00
  -3   4 -11  200.58   15.50
   3  -4  11  217.48   16.70
   3  -4  11  192.38   16.60
  -4   4 -11    6.30    4.30
   4  -4  11    5.00    4.30
  -5   4 -11   22.40    6.90
   5  -4  11   22.30    9.90
   7   3 -11   57.09   10.20
  -7  -3  11   75.79   10.10
   6   3 -11   11.50    4.60
  -6  -3  11   20.60    4.80
   5   3 -11    4.00    2.80
  -5  -3  11   -3.90    2.30
  -5  -3  11    1.90    1.70
   4   3 -11    5.50    2.90
   4   3 -11    7.30    2.50
  -4  -3  11    9.00    3.50
   3   3 -11    5.70    2.60
   3   3 -11    7.60    2.70
  -3  -3  11    9.10    2.80
  -3  -3  11   11.70    3.60
   2   3 -11  382.16   18.50
   2   3 -11  350.96   18.20
  -2  -3  11  368.56   19.20
  -2  -3  11  343.57   17.70
   1   3 -11  752.52   32.70
  -1  -3  11  756.12   33.20
  -1  -3  11  767.12   34.30
  -1  -3  11  747.93   32.30
   0   3 -11   19.60    4.50
   0  -3  11   25.50    5.00
   0  -3  11   29.60    5.30
   0  -3  11   24.80    5.60
  -1   3 -11   21.10    5.40
   1  -3  11   25.10    5.60
   1  -3  11   13.00    4.90
   1  -3  11   26.40    5.50
  -2   3 -11   20.50    5.30
   2  -3  11   13.50    3.80
   2  -3  11   15.00    5.30
   2  -3  11   23.50    5.30
  -3   3 -11   32.40    6.80
   3  -3  11   36.70    7.40
   3  -3  11   27.00    7.10
  -4   3 -11   -3.00    3.90
   4  -3  11    1.00    2.80
  -5   3 -11    3.20    4.90
   5  -3  11   -6.60    4.00
   8   2 -11   16.30    6.50
  -8  -2  11   24.80    6.20
   7   2 -11  122.19   11.70
  -7  -2  11  126.69   10.70
   6   2 -11    7.10    1.60
   6   2 -11    8.30    3.80
  -6  -2  11    7.10    2.10
  -6  -2  11    6.40    3.20
   5   2 -11   22.90    3.50
   5   2 -11   29.40    4.90
  -5  -2  11   26.20    3.70
  -5  -2  11   26.10    4.70
   4   2 -11   11.20    2.90
   4   2 -11   15.00    3.40
  -4  -2  11   19.80    3.80
   3   2 -11  267.57   14.40
   3   2 -11  287.97   13.90
  -3  -2  11  252.77   13.90
  -3  -2  11  269.57   14.30
   2   2 -11   34.10    5.50
  -2  -2  11   37.20    4.10
  -2  -2  11   26.90    5.10
  -2  -2  11   32.50    5.20
   1   2 -11  859.01   35.50
  -1  -2  11  822.12   34.50
  -1  -2  11  831.42   35.10
  -1  -2  11  835.42   33.50
   0   2 -11  396.76   20.70
   0  -2  11  417.56   19.80
   0  -2  11  387.96   20.20
   0  -2  11  377.96   20.20
  -1   2 -11   14.80    4.40
   1  -2  11   18.00    4.30
   1  -2  11   21.10    4.60
   1  -2  11   15.80    4.80
  -2   2 -11   22.10    5.30
   2  -2  11   12.10    4.40
   2  -2  11   16.20    4.20
   2  -2  11   25.30    5.50
  -3   2 -11   55.69    9.00
   3  -2  11   62.19   10.40
   3  -2  11   59.69    7.90
  -4   2 -11    7.50    4.20
   4  -2  11   -1.80    3.10
   5  -2  11   28.70    8.90
   8   1 -11    5.30    5.30
  -8  -1  11   10.60    4.50
   7   1 -11   20.00    5.40
  -7  -1  11   27.50    5.40
   6   1 -11   54.19    6.20
   6   1 -11   58.49    4.70
  -6  -1  11   57.59    5.10
  -6  -1  11   67.99    6.30
   5   1 -11  123.49    8.40
   5   1 -11  130.39    8.00
  -5  -1  11  131.39    8.00
  -5  -1  11  108.89    8.10
   4   1 -11    0.40    1.30
   4   1 -11   -0.50    1.70
  -4  -1  11    1.00    2.00
  -4  -1  11    0.60    1.20
   3   1 -11  110.59    8.30
  -3  -1  11  119.19    6.50
  -3  -1  11  108.79    8.50
   2   1 -11   24.30    4.60
  -2  -1  11   19.20    3.60
  -2  -1  11   18.00    4.10
  -2  -1  11   23.20    2.80
   1   1 -11   11.20    3.70
  -1  -1  11    8.00    2.60
  -1  -1  11   11.00    3.60
  -1  -1  11   12.60    2.80
   0   1 -11  110.69    9.40
   0  -1  11  117.49    9.10
   0  -1  11  117.39    9.50
   0  -1  11  119.99    8.50
  -1   1 -11   -3.20    2.30
   1  -1  11    0.30    1.70
   1  -1  11    1.40    2.30
   1  -1  11   -2.20    1.60
  -2   1 -11  132.59   11.20
   2  -1  11  117.79   10.50
   2  -1  11  140.59   12.00
   2  -1  11   94.29    9.50
  -3   1 -11    5.90    4.00
   3  -1  11   13.50    4.60
   3  -1  11   16.00    5.60
  -4   1 -11   24.70    6.30
  -4   1 -11   20.10    6.10
  -5   1 -11  239.38   19.70
   8   0 -11   13.20    5.50
  -8   0  11   10.20    4.80
   7   0 -11  172.48    8.10
   7   0 -11  165.28   11.90
   7   0 -11  167.48    8.70
   6   0 -11   17.00    3.10
   6   0 -11   23.40    4.10
  -6   0  11   18.30    3.60
  -6   0  11   29.50    4.30
   5   0 -11  521.35   22.20
   5   0 -11  496.95   19.60
  -5   0  11  500.35   22.80
  -5   0  11  516.15   19.40
   4   0 -11    1.50    2.10
  -4   0  11    8.20    2.60
   3   0 -11  196.18   12.00
  -3   0  11  202.68   12.40
   2   0 -11   53.39    5.90
  -2   0  11   52.49    6.10
  -2   0  11   34.30    2.40
   1   0 -11   11.70    3.90
  -1   0  11   22.10    3.40
  -1   0  11   22.90    3.40
  -1   0  11   21.70    4.70
   0   0 -11   -0.70    1.70
   0   0  11    3.60    1.60
   0   0  11    0.90    2.00
   0   0  11    1.90    3.10
  -1   0 -11  170.08   12.50
   1   0  11  179.28   12.30
   1   0  11  149.29   11.80
   1   0  11  181.28   11.80
  -2   0 -11    4.40    3.00
  -2   0 -11    6.10    3.20
   2   0  11    1.90    2.80
  -3   0 -11   85.29    9.50
  -3   0 -11   64.89    9.60
   3   0  11   86.19    9.70
  -4   0 -11   23.50    6.30
  -4   0 -11   10.40    4.70
  -5   0 -11  191.88   17.80
  -5   0 -11  200.98   17.00
   8  -1 -11   -2.10    1.50
   8  -1 -11   -4.10    3.50
   8  -1 -11    0.50    1.10
  -8   1  11   -2.80    2.80
   7  -1 -11   39.60    5.50
   7  -1 -11   33.70    5.30
   7  -1 -11   38.90    4.20
   6  -1 -11    2.60    1.50
   6  -1 -11    5.80    2.00
   6  -1 -11    7.90    2.60
  -6   1  11    7.00    3.10
   5  -1 -11  329.07   16.50
  -5   1  11  329.87   17.50
   4  -1 -11   54.89    6.00
  -4   1  11   47.80    6.80
   3  -1 -11   15.80    4.00
  -3   1  11   15.30    4.10
   2  -1 -11  225.08   13.80
  -2   1  11  229.88   14.10
   1  -1 -11   69.19    7.30
  -1   1  11   82.09    7.80
  -1   1  11   71.39    4.80
  -1   1  11   66.29    4.80
   0  -1 -11  406.56   21.10
   0   1  11  407.16   20.50
   0   1  11  370.76   20.60
   0   1  11  361.86   17.70
  -1  -1 -11    1.70    2.80
  -1  -1 -11   -1.10    1.70
   1   1  11   -1.30    2.40
   1   1  11    2.10    2.60
  -2  -1 -11   17.80    4.40
  -2  -1 -11   24.60    5.50
   2   1  11   26.10    5.80
  -3  -1 -11   23.50    5.90
  -3  -1 -11   27.70    6.50
   3   1  11   24.80    6.30
  -4  -1 -11    5.20    4.10
  -4  -1 -11    2.90    3.80
  -5  -1 -11   29.60    7.30
  -5  -1 -11   27.00   10.10
   8  -2 -11   -1.00    1.70
   7  -2 -11  127.19    7.70
   7  -2 -11  130.79    8.20
   7  -2 -11  129.39    9.40
   7  -2 -11  144.39    9.10
   6  -2 -11   14.00    3.60
  -6   2  11   13.90    4.10
   5  -2 -11  188.48   12.00
  -5   2  11  199.18   13.30
   4  -2 -11    4.50    2.50
   3  -2 -11   88.49    8.00
  -3   2  11   71.89    7.70
   2  -2 -11   29.70    5.40
  -2   2  11   33.30    6.10
   1  -2 -11   -1.20    1.30
  -1   2  11    0.50    2.30
  -1   2  11    0.10    1.10
  -1   2  11    2.90    1.60
   0  -2 -11   23.70    5.40
   0   2  11   25.80    4.70
   0   2  11   22.90    5.40
  -1  -2 -11    3.70    3.00
  -1  -2 -11    1.00    2.10
   1   2  11   -3.00    2.70
  -2  -2 -11    7.60    4.00
  -2  -2 -11    8.90    3.60
   2   2  11   14.60    4.90
  -3  -2 -11    5.90    3.80
  -3  -2 -11   16.60    5.10
   3   2  11    4.70    3.60
  -4  -2 -11    2.50    4.10
  -4  -2 -11    4.90    4.50
  -5  -2 -11   10.10    5.90
  -5  -2 -11    5.90    5.50
   7  -3 -11   37.30    6.20
   7  -3 -11   35.90    5.60
   6  -3 -11    7.80    3.60
  -6   3  11    2.50    3.70
   5  -3 -11  183.18   12.30
  -5   3  11  173.08   13.00
   4  -3 -11  285.37   16.80
  -4   3  11  280.47   17.30
   3  -3 -11    9.70    3.80
  -3   3  11   12.30    4.90
   2  -3 -11   71.89    7.70
  -2   3  11   63.09    9.00
   1  -3 -11  455.35   23.10
  -1   3  11  433.56   16.90
  -1   3  11  432.16   16.60
  -1   3  11  416.76   23.10
   0  -3 -11  367.46   20.40
   0  -3 -11  323.57   19.40
   0   3  11  341.87   22.70
   0   3  11  339.17   17.70
  -1  -3 -11   14.30    3.70
  -1  -3 -11    7.00    3.40
   1   3  11   17.20    5.50
  -2  -3 -11  201.48   14.90
  -2  -3 -11  212.68   14.40
   2   3  11  180.68   14.70
  -3  -3 -11    3.40    3.70
  -3  -3 -11   -3.60    2.20
   3   3  11   -6.20    3.50
  -4  -3 -11   -0.60    4.00
  -4  -3 -11    2.80    4.20
   7  -4 -11   55.09    7.60
   7  -4 -11   42.50    7.60
   6  -4 -11   -4.50    1.60
  -6   4  11   -0.50    4.40
   5  -4 -11   42.00    6.60
  -5   4  11   38.40    7.70
   4  -4 -11    9.20    3.80
  -4   4  11   20.40    6.10
   3  -4 -11   46.30    7.70
  -3   4  11   35.20    7.00
   2  -4 -11  100.59    9.70
  -2   4  11   93.39    9.90
   1  -4 -11    3.10    2.50
  -1   4  11   -0.10    1.60
   0  -4 -11   13.90    4.90
   0  -4 -11    6.20    2.30
  -1  -4 -11  100.09   10.00
  -1  -4 -11  107.19    8.80
   1   4  11   83.59    9.70
  -2  -4 -11   58.39    9.50
  -2  -4 -11   62.69    7.60
   2   4  11   42.90    8.90
  -3  -4 -11    4.90    3.10
  -3  -4 -11   -3.50    2.30
   3   4  11   -9.90    6.00
  -4  -4 -11   11.40    5.80
  -4  -4 -11   22.80    6.40
   7  -5 -11   15.50    5.10
   6  -5 -11    7.70    4.20
   5  -5 -11  127.59   11.00
   4  -5 -11   96.89    9.80
   3  -5 -11   -0.10    2.50
   2  -5 -11  323.97   19.50
   1  -5 -11   62.19    4.60
   1  -5 -11   51.59    8.40
  -1   5  11   62.79    5.40
   0  -5 -11    0.00    3.10
   0  -5 -11    4.60    2.10
   0   5  11   -4.40    4.40
  -1  -5 -11   22.40    4.50
  -1  -5 -11   12.60    4.90
   1   5  11   24.10    6.30
  -2  -5 -11   79.59   11.30
  -3  -5 -11  151.88   13.50
  -3  -5 -11  140.19   13.50
   6  -6 -11    8.70    4.50
   5  -6 -11   -1.10    4.00
   4  -6 -11  106.09   10.90
   3  -6 -11   -3.20    1.70
   2  -6 -11    8.40    4.20
   1  -6 -11  126.19   11.80
   1  -6 -11  106.19    7.20
   0  -6 -11   89.19    9.90
   0  -6 -11   93.59    7.80
   0   6  11   87.99    9.10
  -1  -6 -11  136.19   11.00
   1   6  11  133.49   12.90
  -2  -6 -11   -3.10    2.60
  -2  -6 -11    1.40    3.50
   2   6  11   -3.20    6.80
   5  -7 -11    9.10    5.00
   4  -7 -11   56.59    9.60
   3  -7 -11   38.90    7.90
   2  -7 -11    1.10    3.30
   1  -7 -11   51.89    5.20
   1  -7 -11   43.40   10.00
  -1   7  11   50.79    6.40
   0  -7 -11    6.10    3.80
   0  -7 -11    4.30    3.00
   0   7  11    6.70    5.20
  -1  -7 -11    2.60    2.80
  -1  -7 -11   -5.80    3.20
   1   7  11   -9.20    6.20
   4  -8 -11   32.10    7.70
   3  -8 -11   44.10    9.40
   2  -8 -11   -6.20    2.00
   2  -8 -11    0.60    1.80
  -2   8  11   -6.20    2.80
   1  -8 -11   64.99   10.50
   1  -8 -11   44.40    5.60
  -1   8  11   67.49    8.50
   0  -8 -11  111.69   10.10
   0   8  11   99.19   12.20
  -3 -10  12  147.29   13.10
  -3 -10  12  182.28   20.20
   2  10 -12   95.49   12.70
   1  10 -12    8.10    5.00
   0  10 -12   -7.30    3.50
   0 -10  12  -10.40    5.10
  -1  10 -12    6.40    5.30
   1 -10  12    2.20    7.10
   2 -10  12   39.40   10.00
  -4  -9  12    7.10    3.50
  -4  -9  12   -1.70    3.40
  -4  -9  12    0.70    6.90
   3   9 -12    1.80    4.00
  -3  -9  12    1.20    3.40
  -3  -9  12    1.00    5.70
   2   9 -12   14.00    5.00
  -2  -9  12   20.90    8.20
   1   9 -12   75.19   10.90
  -1  -9  12   63.99   12.80
   0   9 -12   12.40    5.10
   0  -9  12    2.50    5.30
  -1   9 -12   -2.50    3.80
   1  -9  12    3.90    5.70
  -2   9 -12  166.48   16.10
   2  -9  12  168.98   18.30
   3  -9  12   93.79   15.70
  -5  -8  12  109.99    8.60
  -5  -8  12  107.39   14.50
  -5  -8  12  109.49    8.20
  -4  -8  12   -6.70    2.70
  -4  -8  12    0.80    5.30
   3   8 -12    2.70    3.30
  -3  -8  12   -2.00    5.30
  -3  -8  12   -3.20    3.40
   2   8 -12   24.30    5.60
  -2  -8  12    7.00    3.40
  -2  -8  12    0.50    5.40
   1   8 -12    1.00    3.10
  -1  -8  12    3.10    4.30
   0   8 -12  255.27   18.70
   0  -8  12  290.87   22.30
  -1   8 -12   30.30    7.60
   1  -8  12   30.10    8.70
  -2   8 -12  145.19   16.30
   2  -8  12  129.89   16.10
  -3   8 -12    0.90    4.30
   3  -8  12   -4.70    5.00
  -6  -7  12   18.10    7.10
  -5  -7  12   17.10    3.90
  -5  -7  12   28.50    7.10
   4   7 -12   -0.80    2.60
  -4  -7  12    3.80    2.40
  -4  -7  12    1.30    4.60
   3   7 -12    6.80    3.30
   3   7 -12    8.60    4.40
  -3  -7  12    6.10    3.00
  -3  -7  12    4.40    5.30
   2   7 -12   19.90    5.10
   2   7 -12   25.40    6.50
  -2  -7  12   21.80    7.00
  -2  -7  12   27.80    6.80
   1   7 -12    0.20    3.10
   1   7 -12   -1.80    2.70
  -1  -7  12   -0.60    2.70
   0   7 -12   38.30    8.10
   0   7 -12   33.60    7.10
   0  -7  12   53.09   10.40
  -1   7 -12   11.90    5.10
   1  -7  12    8.40    6.10
  -2   7 -12   20.70    5.70
   2  -7  12   18.30    6.90
   3  -7  12    6.10    5.20
  -4   7 -12    3.80    4.10
   4  -7  12   -3.50    5.70
  -6  -6  12    2.10    4.30
   5   6 -12   -5.60    3.60
   5   6 -12    0.80    2.10
  -5  -6  12    4.30    2.50
  -5  -6  12    2.00    4.70
   4   6 -12   29.10    4.90
   4   6 -12   13.50    6.80
  -4  -6  12   22.10    4.20
  -4  -6  12   18.80    7.60
   3   6 -12    2.30    3.50
   3   6 -12    1.10    2.60
  -3  -6  12    3.20    4.10
  -3  -6  12    0.50    2.20
   2   6 -12   69.49    8.20
   2   6 -12   82.29    9.20
  -2  -6  12   99.29    8.30
  -2  -6  12   75.19   11.80
   1   6 -12   29.00    6.40
   1   6 -12   34.80    6.70
  -1  -6  12   23.80    5.00
  -1  -6  12   24.00    7.00
   0   6 -12   19.80    5.30
   0  -6  12   24.70    6.30
   0  -6  12   15.20    4.20
   0  -6  12   11.40    4.70
  -1   6 -12    1.70    2.80
   1  -6  12    7.00    3.60
   1  -6  12    6.50    5.10
  -2   6 -12   -1.80    3.50
   2  -6  12    6.10    5.00
  -3   6 -12    0.40    4.10
   3  -6  12    4.80    4.60
  -4   6 -12  147.59   14.70
   4  -6  12  149.39   17.10
  -7  -5  12    6.40    5.40
   6   5 -12    3.90    3.40
  -6  -5  12    1.80    4.50
   5   5 -12   48.10    8.50
   5   5 -12   45.40    4.90
  -5  -5  12   40.70    7.70
  -5  -5  12   48.50    4.80
   4   5 -12   80.89    7.10
   4   5 -12   68.19    8.60
  -4  -5  12   79.79    6.70
  -4  -5  12   75.19    9.70
   3   5 -12  149.49   12.10
   3   5 -12  149.39   10.70
  -3  -5  12  119.19   12.30
  -3  -5  12  155.58   10.30
   2   5 -12   40.90    7.20
   2   5 -12   27.40    6.10
  -2  -5  12   42.00    6.10
  -2  -5  12   35.80    8.10
   1   5 -12  146.59   13.40
   1   5 -12  145.89   12.10
  -1  -5  12  131.09   12.00
   0   5 -12    1.20    2.40
   0  -5  12    0.20    3.30
   0  -5  12    4.00    3.00
   0  -5  12   -1.80    2.30
  -1   5 -12   37.30    6.80
   1  -5  12   44.50    8.80
   1  -5  12   25.20    7.40
  -2   5 -12   17.00    5.80
   2  -5  12   18.50    5.50
   2  -5  12   19.80    6.30
  -3   5 -12   22.40    7.10
   3  -5  12   31.00    8.40
  -4   5 -12    8.00    4.60
   4  -5  12    1.00    5.40
   7   4 -12    3.90    4.60
  -7  -4  12   -3.90    2.90
   6   4 -12   30.70    7.00
  -6  -4  12   23.50    5.50
   5   4 -12   -4.00    2.90
   5   4 -12    0.00    1.90
  -5  -4  12    6.50    2.50
  -5  -4  12    4.00    2.90
   4   4 -12   84.89    7.30
   4   4 -12   89.69    8.70
  -4  -4  12   78.09    6.70
  -4  -4  12  113.79   10.30
   3   4 -12   -0.30    1.70
   3   4 -12    1.50    2.10
  -3  -4  12    2.80    2.30
   2   4 -12   20.50    4.80
   2   4 -12   26.00    5.00
  -2  -4  12   22.60    5.50
  -2  -4  12   21.90    4.60
   1   4 -12   15.80    4.60
  -1  -4  12   21.60    4.80
  -1  -4  12   25.50    5.20
  -1  -4  12   22.70    6.10
   0   4 -12   82.49    9.00
   0  -4  12   85.29    8.40
   0  -4  12   96.39   10.10
   0  -4  12   93.39    9.20
  -1   4 -12   26.30    6.40
   1  -4  12   28.30    6.50
   1  -4  12   29.40    6.60
  -2   4 -12   29.10    6.80
   2  -4  12   33.10    6.20
   2  -4  12   27.40    6.60
  -3   4 -12    3.90    4.40
   3  -4  12    8.00    5.30
  -4   4 -12    4.50    3.90
   4  -4  12    8.60    6.10
  -5   4 -12   23.00    7.40
   5  -4  12   40.70   10.30
   7   3 -12   -4.50    3.50
  -7  -3  12    8.90    4.60
   6   3 -12  108.29    5.90
   6   3 -12  132.49   10.80
  -6  -3  12  112.79    9.80
  -6  -3  12   98.59    6.00
   5   3 -12   33.00    6.40
   5   3 -12   33.10    4.70
  -5  -3  12   38.60    4.40
  -5  -3  12   33.30    5.90
   4   3 -12    5.10    2.40
  -4  -3  12    9.00    2.90
  -4  -3  12    6.50    3.10
   3   3 -12  167.48   11.00
   3   3 -12  158.18   10.80
  -3  -3  12  185.28   11.20
  -3  -3  12  144.89   11.40
   2   3 -12  149.29   10.90
  -2  -3  12  155.98   10.70
  -2  -3  12  140.29   11.00
   1   3 -12   20.20    4.90
  -1  -3  12   17.70    4.40
  -1  -3  12   21.20    4.50
  -1  -3  12   17.00    4.80
   0   3 -12  285.97   17.00
   0  -3  12  241.58   15.50
   0  -3  12  260.67   16.60
   0  -3  12  268.47   15.70
  -1   3 -12   13.80    4.80
   1  -3  12   22.00    5.30
   1  -3  12   24.40    5.70
   1  -3  12   22.90    6.00
  -2   3 -12    3.60    3.90
   2  -3  12    5.80    5.00
  -3   3 -12   14.40    5.10
   3  -3  12    5.40    4.40
   4  -3  12   16.20    7.20
  -5   3 -12   85.39   12.30
   5  -3  12   70.49   13.50
   7   2 -12   12.40    5.00
  -7  -2  12   15.40    4.10
   6   2 -12   58.49    4.70
   6   2 -12   58.79    6.60
  -6  -2  12   52.69    4.90
  -6  -2  12   58.29    6.40
   5   2 -12    9.50    3.00
   5   2 -12   11.20    2.90
  -5  -2  12    8.80    2.80
   4   2 -12   64.79    5.90
   4   2 -12   83.39    6.90
  -4  -2  12   63.39    6.70
  -4  -2  12   72.59    6.60
   3   2 -12    2.90    1.60
   3   2 -12    2.30    2.40
  -3  -2  12    2.00    2.20
  -3  -2  12    2.10    2.20
   2   2 -12  689.93   30.10
  -2  -2  12  652.03   29.50
  -2  -2  12  687.93   27.60
   1   2 -12    1.40    2.30
  -1  -2  12    0.70    2.40
  -1  -2  12    4.30    1.70
  -1  -2  12   -2.10    1.90
   0   2 -12   28.40    5.90
   0  -2  12   25.20    5.40
   0  -2  12   29.50    6.00
   0  -2  12   31.20    5.60
  -1   2 -12   74.19    8.50
   1  -2  12   86.49    8.40
   1  -2  12   89.69    9.60
   1  -2  12   79.29    8.40
  -2   2 -12   17.60    5.30
   2  -2  12   16.50    5.50
   2  -2  12   15.20    4.30
  -3   2 -12  117.09   11.70
   3  -2  12  119.79   11.70
   3  -2  12  134.69   13.10
   4  -2  12  100.49   13.00
  -5   2 -12    4.20    5.70
   5  -2  12    4.10    5.70
   7   1 -12   -0.80    0.90
   7   1 -12   -0.90    2.90
  -7  -1  12    1.00    3.00
   6   1 -12   16.50    3.00
   6   1 -12   18.40    3.90
  -6  -1  12   18.20    5.20
  -6  -1  12   17.40    3.60
   5   1 -12   34.80    4.10
   5   1 -12   35.00    4.90
  -5  -1  12   35.70    3.70
  -5  -1  12   39.40    5.90
   4   1 -12   95.69    7.60
  -4  -1  12   84.09    5.00
  -4  -1  12   94.99    7.90
   3   1 -12  138.09    9.90
  -3  -1  12  139.89    6.80
  -3  -1  12  136.49    6.70
  -3  -1  12  142.29   10.20
   2   1 -12   27.60    5.20
  -2  -1  12   19.60    4.60
  -2  -1  12   17.10    2.90
  -2  -1  12   24.10    3.80
   1   1 -12  359.36   22.30
  -1  -1  12  358.06   19.60
  -1  -1  12  393.36   17.20
  -1  -1  12  364.36   20.20
   0   1 -12  289.57   17.00
   0  -1  12  249.28   16.00
   0  -1  12  264.57   15.40
  -1   1 -12   90.49    9.20
   1  -1  12   90.49    8.50
   1  -1  12  107.79    9.90
  -2   1 -12  101.09   10.30
   2  -1  12  127.29   11.90
   2  -1  12  113.29   10.70
  -3   1 -12    0.70    2.40
   3  -1  12   11.60    4.50
   3  -1  12    2.70    3.80
   4  -1  12  154.28   15.80
  -5   1 -12    9.00    6.00
  -5   1 -12    6.40    4.30
   5  -1  12    0.00    6.10
   7   0 -12   38.70    4.80
   7   0 -12   30.50    4.20
  -7   0  12   32.00    5.80
   6   0 -12   59.09    5.60
   6   0 -12   62.19    4.80
  -6   0  12   68.19    4.60
  -6   0  12   64.29    6.70
   5   0 -12    8.30    3.00
  -5   0  12    8.40    3.70
   4   0 -12  107.59    8.70
  -4   0  12  116.59    9.40
   3   0 -12  226.08   13.80
  -3   0  12  229.78   14.10
   2   0 -12  324.57   17.60
  -2   0  12  297.77   17.30
   1   0 -12  100.49    9.30
  -1   0  12  100.89    7.20
  -1   0  12  103.89    9.40
  -1   0  12  120.09    7.10
   0   0 -12  289.07   17.10
   0   0  12  275.07   14.40
   0   0  12  270.77   15.00
   0   0  12  240.88   16.20
  -1   0 -12   15.20    4.60
   1   0  12   33.50    6.20
   1   0  12   34.70    6.20
  -2   0 -12    3.50    3.30
   2   0  12    4.10    3.60
   2   0  12    1.40    2.60
  -3   0 -12  123.29   11.70
  -3   0 -12   92.99   10.70
   3   0  12  102.29   10.80
  -4   0 -12   25.70    7.60
   7  -1 -12   -2.00    1.70
   7  -1 -12   -2.10    1.40
   7  -1 -12   -1.10    1.90
   6  -1 -12    5.40    2.20
  -6   1  12    1.30    3.20
   5  -1 -12  280.17   15.10
  -5   1  12  273.57   15.90
   4  -1 -12    0.80    1.90
  -4   1  12   -1.00    2.70
   3  -1 -12   35.20    5.60
  -3   1  12   47.20    7.00
   2  -1 -12  193.68   15.00
   1  -1 -12  341.17   19.10
  -1   1  12  340.07   14.50
  -1   1  12  331.57   19.20
  -1   1  12  340.37   14.50
   0  -1 -12   50.59    7.80
   0   1  12   51.89    5.90
   0   1  12   45.20    5.40
   0   1  12   51.89    8.20
  -1  -1 -12   52.39    8.30
   1   1  12   62.99    6.90
   1   1  12   71.49    7.90
  -2  -1 -12   32.40    6.40
  -2  -1 -12   30.00    6.30
   2   1  12   36.70    7.00
  -3  -1 -12    9.30    4.80
  -3  -1 -12    8.60    4.10
   3   1  12    4.30    4.90
  -4  -1 -12   -6.70    3.00
  -4  -1 -12    5.50    5.20
   7  -2 -12   27.00    4.40
   6  -2 -12   23.30    4.70
  -6   2  12   15.80    4.90
   5  -2 -12   17.80    4.20
  -5   2  12    5.90    4.40
   4  -2 -12  292.57   17.10
  -4   2  12  312.17   18.70
   3  -2 -12   83.89    8.10
  -3   2  12   65.99    9.10
   2  -2 -12   -3.10    1.70
  -2   2  12    6.90    3.60
   1  -2 -12    0.90    2.80
  -1   2  12    7.40    2.30
   0  -2 -12  250.77   16.50
   0   2  12  254.07   14.10
   0   2  12  245.88   13.70
  -1  -2 -12   14.60    4.60
  -1  -2 -12    8.20    3.50
   1   2  12   14.40    4.40
  -2  -2 -12  269.17   18.30
  -2  -2 -12  262.37   16.90
   2   2  12  283.77   18.40
  -3  -2 -12    3.60    3.30
  -3  -2 -12   -3.70    2.70
   3   2  12    8.40    5.20
  -4  -2 -12   22.70    7.50
  -4  -2 -12    7.90    5.50
   7  -3 -12    9.60    4.30
   6  -3 -12    0.10    2.40
  -6   3  12    2.00    3.80
   5  -3 -12   30.40    5.30
  -5   3  12   45.40    7.40
   4  -3 -12    3.50    2.40
  -4   3  12    2.50    2.80
   3  -3 -12   38.20    6.60
  -3   3  12   32.90    6.30
   2  -3 -12   53.29    8.00
  -2   3  12   57.49   10.20
   1  -3 -12  117.09   10.60
  -1   3  12  112.29    5.40
   0  -3 -12   56.59    5.40
   0  -3 -12   70.29    9.70
   0   3  12   58.39    6.60
  -1  -3 -12   37.20    6.10
  -1  -3 -12   33.90    6.80
   1   3  12   22.50    6.10
  -2  -3 -12    1.30    3.50
  -2  -3 -12    6.40    3.60
   2   3  12   13.20    5.20
  -3  -3 -12   62.59    9.90
  -3  -3 -12   72.19    9.10
   6  -4 -12   21.20    5.60
  -6   4  12   17.50    6.50
   5  -4 -12    1.10    3.00
   4  -4 -12  105.99    9.80
   3  -4 -12   21.30    5.70
   2  -4 -12   45.60    7.50
   1  -4 -12   47.30    7.50
  -1   4  12   53.09    5.20
  -1   4  12   47.60    3.30
   0  -4 -12    3.40    3.50
   0  -4 -12    0.10    1.60
   0   4  12   -2.30    2.90
  -1  -4 -12   57.79    9.40
  -1  -4 -12   57.79    6.50
   1   4  12   48.10    8.70
  -2  -4 -12   67.79   12.90
  -2  -4 -12   67.09   11.20
   2   4  12   62.19   10.60
  -3  -4 -12  123.59   11.90
  -3  -4 -12  107.99   11.90
   6  -5 -12   21.70    6.10
   5  -5 -12   -0.90    3.40
   4  -5 -12   52.79    8.60
   3  -5 -12   42.80    7.30
   2  -5 -12  113.59   11.20
   1  -5 -12    6.10    4.00
  -1   5  12    6.30    2.20
   0  -5 -12  121.79    8.80
   0  -5 -12  132.59   12.10
  -1  -5 -12   52.59    6.70
  -1  -5 -12   44.80    8.40
   1   5  12   53.49    9.40
  -2  -5 -12   60.19    9.20
  -2  -5 -12   60.89    9.80
   2   5  12   58.59   11.20
   5  -6 -12  155.68   13.60
   4  -6 -12  110.09   11.30
   3  -6 -12   15.90    5.10
   2  -6 -12   10.30    4.40
   1  -6 -12   22.70    3.00
  -1   6  12   15.30    3.60
   0  -6 -12   22.90    4.20
   0  -6 -12   22.40    6.60
   0   6  12   26.40    5.70
  -1  -6 -12   20.60    5.90
  -1  -6 -12   37.40    6.40
   1   6  12   20.50    7.10
   4  -7 -12   36.50    8.20
   3  -7 -12    4.70    4.20
   2  -7 -12    5.10    3.40
   1  -7 -12    5.60    4.40
  -1   7  12    7.30    3.60
   0  -7 -12   19.50    4.40
   0  -7 -12   29.80    6.80
   0   7  12   22.20    7.10
   2  10 -13   11.20    5.50
  -2 -10  13   -4.20    7.10
   1  10 -13   16.40    6.90
  -1 -10  13   20.20    9.70
   0  10 -13    5.70    5.10
   0 -10  13   -4.30    6.10
  -4  -9  13    1.30    4.70
   3   9 -13    1.60    4.20
  -3  -9  13   -6.20    3.80
  -3  -9  13   -7.30    5.10
   2   9 -13   -2.10    3.70
  -2  -9  13   -5.60    6.20
   1   9 -13   17.40    5.50
  -1  -9  13   -0.20    5.40
   0   9 -13   -3.00    4.10
   0  -9  13   -2.50    5.90
  -1   9 -13   56.29   10.50
   1  -9  13   35.60   13.00
  -2   9 -13   58.09   12.90
   2  -9  13   45.10   10.50
  -5  -8  13   -0.80    3.00
   4   8 -13   35.80    6.50
  -4  -8  13   29.40    5.50
  -4  -8  13   39.70   10.30
   3   8 -13   28.90    6.10
  -3  -8  13   23.50    5.40
  -3  -8  13    7.20    7.00
   2   8 -13   -1.80    3.20
   1   8 -13    2.20    3.90
  -1  -8  13   -3.40    5.40
   0   8 -13   65.29   10.70
   0  -8  13   50.39   10.40
  -1   8 -13   32.90    8.50
   1  -8  13   15.20    8.00
  -2   8 -13    4.10    5.00
   3  -8  13   38.30    9.90
  -5  -7  13    3.80    3.10
  -5  -7  13    2.80    5.00
   4   7 -13    1.40    2.80
  -4  -7  13    2.00    2.90
  -4  -7  13    4.80    5.50
   3   7 -13    2.70    3.70
  -3  -7  13   -1.50    4.70
  -3  -7  13    0.80    3.60
   2   7 -13  128.89   11.60
   2   7 -13  143.89   13.60
  -2  -7  13  139.49   11.20
  -2  -7  13  135.29   14.30
   1   7 -13  103.49   10.80
   1   7 -13  133.09   12.80
  -1  -7  13  114.89   13.40
   0   7 -13   -4.30    3.40
   0  -7  13   -0.50    3.80
  -1   7 -13   14.10    6.20
   1  -7  13   12.10    5.50
  -2   7 -13   21.10    6.90
   2  -7  13    3.00    6.30
  -3   7 -13   -3.20    5.10
   3  -7  13   -2.90    5.90
  -6  -6  13   38.00    8.80
   5   6 -13   19.50    6.80
   5   6 -13    6.80    3.20
  -5  -6  13   15.20    3.80
  -5  -6  13    6.60    5.10
   4   6 -13    4.20    3.90
   4   6 -13   -5.30    2.20
  -4  -6  13    3.20    4.30
  -4  -6  13    3.00    3.20
   3   6 -13   11.40    5.30
   3   6 -13   10.20    3.80
  -3  -6  13    7.40    3.30
  -3  -6  13   12.60    7.00
   2   6 -13   59.69    8.50
   2   6 -13   62.99    8.40
  -2  -6  13   51.89    7.40
  -2  -6  13   56.99   12.10
   1   6 -13   76.19    8.90
   1   6 -13   89.59   10.00
  -1  -6  13   70.59    8.00
  -1  -6  13   77.89   10.60
   0   6 -13   33.90    7.00
   0  -6  13   52.79   10.00
   0  -6  13   47.80    8.30
  -1   6 -13   23.30    6.10
   1  -6  13   12.50    5.60
  -2   6 -13   29.20    7.10
   2  -6  13   30.40    8.60
  -3   6 -13    2.60    4.50
   3  -6  13   -1.60    5.70
   6   5 -13    6.90    4.40
  -6  -5  13    0.80    4.50
  -6  -5  13    1.00    2.10
   5   5 -13   -2.00    3.80
   5   5 -13    3.90    2.60
  -5  -5  13    5.10    3.50
  -5  -5  13   -6.20    3.40
   4   5 -13   48.10    8.00
  -4  -5  13   58.59    6.10
  -4  -5  13   48.70    8.80
   3   5 -13   62.39    7.90
   3   5 -13   59.89    7.00
  -3  -5  13   44.10    8.60
  -3  -5  13   60.19    6.70
   2   5 -13   67.29    8.20
   2   5 -13   49.70    9.00
  -2  -5  13   60.19    9.00
  -2  -5  13   57.39    9.80
   1   5 -13   42.40    7.30
  -1  -5  13   25.90    6.20
  -1  -5  13   27.00    6.80
  -1  -5  13   24.70    5.20
   0   5 -13   57.69    9.30
   0  -5  13   75.59   11.40
   0  -5  13   73.79    9.10
  -1   5 -13   20.50    6.00
   1  -5  13    6.30    4.60
   1  -5  13   17.30    4.90
  -2   5 -13    3.70    4.30
   2  -5  13    5.30    4.30
  -3   5 -13    1.30    4.50
   3  -5  13    2.20    5.30
  -4   5 -13    1.60    4.50
   7   4 -13   39.50    7.90
  -7  -4  13   26.10    7.20
   6   4 -13   -1.20    3.90
   6   4 -13   -1.70    1.50
  -6  -4  13    0.70    2.20
  -6  -4  13    2.70    3.80
   5   4 -13    7.40    3.80
   5   4 -13    8.90    2.70
  -5  -4  13   10.60    3.10
  -5  -4  13    9.90    4.20
   4   4 -13   15.30    3.90
   4   4 -13   16.80    4.00
  -4  -4  13   11.50    4.50
  -4  -4  13   23.00    4.70
   3   4 -13    2.00    2.40
   3   4 -13   -0.70    2.40
  -3  -4  13    1.50    2.70
  -3  -4  13    6.50    4.00
   2   4 -13    1.50    2.00
  -2  -4  13    2.50    2.90
  -2  -4  13    2.30    3.70
   1   4 -13   38.70    6.80
  -1  -4  13   39.90    6.70
  -1  -4  13   45.90    8.00
  -1  -4  13   52.19    7.70
   0   4 -13   12.00    4.40
   0  -4  13   11.70    4.40
   0  -4  13   10.50    5.10
  -1   4 -13   26.00    6.10
   1  -4  13   13.00    5.90
  -2   4 -13   41.40    8.40
   2  -4  13   36.50    7.80
   2  -4  13   38.70    8.20
   3  -4  13   56.49   11.40
  -4   4 -13   21.80    6.80
   7   3 -13   49.30    7.50
  -7  -3  13   38.20    7.20
   6   3 -13    1.70    3.10
  -6  -3  13   -1.50    2.60
  -6  -3  13   -1.20    2.20
   5   3 -13   -3.90    1.70
   5   3 -13    8.10    3.00
  -5  -3  13   -0.60    2.40
  -5  -3  13    1.80    2.80
   4   3 -13   17.30    4.10
  -4  -3  13   17.80    4.30
  -4  -3  13   17.00    4.20
   3   3 -13   12.00    3.30
   3   3 -13   10.50    3.20
  -3  -3  13   28.00    5.20
  -3  -3  13   14.50    4.00
   2   3 -13   76.49   11.00
  -2  -3  13   78.49    8.00
  -2  -3  13   81.69    8.50
   1   3 -13   83.99    8.90
  -1  -3  13   75.39    8.60
  -1  -3  13   85.89    7.80
  -1  -3  13   94.09    8.90
   0   3 -13   15.10    4.90
   0  -3  13   22.70    5.70
   0  -3  13   16.10    4.40
  -1   3 -13    8.30    4.50
   1  -3  13    3.20    3.10
   1  -3  13    6.20    3.80
  -2   3 -13    2.10    4.00
   2  -3  13    0.40    3.30
   2  -3  13    2.70    3.20
  -3   3 -13   43.70   13.00
   3  -3  13   29.80    8.20
  -4   3 -13   30.00    7.80
   4  -3  13   47.30   10.70
   7   2 -13  318.37   17.70
  -7  -2  13  289.47   16.60
   6   2 -13   12.30    2.90
  -6  -2  13   17.30    4.00
  -6  -2  13    7.90    3.40
   5   2 -13   20.90    3.90
   5   2 -13   29.30    4.60
  -5  -2  13   23.80    4.60
   4   2 -13   67.99    5.60
   4   2 -13   60.59    6.50
  -4  -2  13   57.99    6.50
  -4  -2  13   69.79    5.70
   3   2 -13    0.20    2.00
  -3  -2  13   -0.80    2.20
  -3  -2  13   -0.20    1.50
  -2  -2  13   10.80    3.00
   1   2 -13   40.70    6.90
  -1  -2  13   39.50    6.70
  -1  -2  13   31.60    5.20
  -1  -2  13   29.80    5.60
   0   2 -13    7.20    3.60
   0  -2  13    5.60    3.30
   0  -2  13    2.10    2.10
  -1   2 -13  222.78   16.10
   1  -2  13  245.08   15.60
   1  -2  13  248.28   16.70
  -2   2 -13   31.20    7.00
   2  -2  13   47.30    8.20
   2  -2  13   51.49    9.20
  -3   2 -13   87.79   14.20
   3  -2  13   82.79   12.80
  -4   2 -13    5.30    4.80
   4  -2  13    6.90    5.30
   7   1 -13    3.60    1.70
   7   1 -13    8.10    4.40
  -7  -1  13   10.10    3.60
   6   1 -13   32.90    4.10
   6   1 -13   36.30    4.80
  -6  -1  13   37.80    5.40
  -6  -1  13   45.00    4.10
   5   1 -13   36.90    5.30
  -5  -1  13   37.30    2.70
  -5  -1  13   29.70    5.50
   4   1 -13   15.30    3.80
  -4  -1  13    8.80    3.90
   3   1 -13   12.30    3.50
  -3  -1  13    4.70    1.10
  -3  -1  13    4.00    3.40
   2   1 -13   -2.20    2.00
  -2  -1  13    4.20    1.80
  -2  -1  13    1.90    2.80
   1   1 -13  636.04   30.40
  -1  -1  13  625.54   30.10
  -1  -1  13  637.64   30.30
  -1  -1  13  678.33   26.90
   0   1 -13   49.30    7.70
   0  -1  13   32.60    6.00
   0  -1  13   32.60    5.30
  -1   1 -13   44.00    7.80
   1  -1  13   42.50    6.60
   1  -1  13   37.90    7.40
  -2   1 -13    4.50    3.70
   2  -1  13    4.40    3.40
   3  -1  13   24.30    7.00
  -4   1 -13  147.59   15.00
   4  -1  13  160.38   16.60
   7   0 -13   59.39    4.60
   7   0 -13   67.89    5.70
   6   0 -13   18.20    3.70
  -6   0  13    4.70    3.50
   5   0 -13  281.87   15.60
  -5   0  13  298.27   16.80
   4   0 -13   -0.80    2.60
  -4   0  13    3.10    2.90
   2   0 -13    8.30    3.30
  -2   0  13   -0.10    2.50
   1   0 -13  104.39    9.80
  -1   0  13  108.09    6.90
  -1   0  13   87.59    9.20
  -1   0  13   88.59    6.90
   0   0 -13  232.58   15.60
   0   0  13  227.38   13.50
   0   0  13  199.68   14.10
  -1   0 -13    7.20    4.00
   1   0  13    1.50    2.90
   1   0  13   10.10    4.10
  -2   0 -13   -2.20    3.30
   2   0  13   -1.70    3.40
   2   0  13    2.30    3.30
  -3   0 -13   24.60   10.40
   3   0  13   31.00    7.50
  -4   0 -13    3.00    4.90
  -4   0 -13    0.80    4.50
   4   0  13   -1.10    4.40
   7  -1 -13    1.20    2.50
  -7   1  13    3.70    4.80
   6  -1 -13   -0.50    2.30
  -6   1  13    3.80    3.80
   5  -1 -13   91.29    8.20
  -5   1  13   85.29    9.00
   3  -1 -13    0.80    1.80
  -3   1  13   -0.20    2.60
   2  -1 -13   -0.10    1.90
  -2   1  13   -4.20    2.30
   1  -1 -13    3.00    3.10
  -1   1  13   -0.20    1.80
  -1   1  13   -1.60    1.50
   0  -1 -13   55.89    8.60
   0   1  13   70.09    6.70
   0   1  13   60.99    6.60
  -1  -1 -13  187.28   14.10
   1   1  13  146.69   11.40
   1   1  13  134.09   11.30
  -2  -1 -13   -5.40    1.70
   2   1  13    1.00    3.60
   2   1  13   -2.40    3.20
  -3  -1 -13   38.70    8.30
  -3  -1 -13   43.40    8.40
   7  -2 -13   21.70    4.30
  -7   2  13    0.10    5.80
  -6   2  13   72.39   11.30
   5  -2 -13   41.80    6.40
  -5   2  13   44.90    7.60
   4  -2 -13   -3.10    1.90
  -4   2  13    1.40    3.10
   3  -2 -13   -4.80    2.00
  -3   2  13   -4.90    2.20
   2  -2 -13   59.79    8.80
   1  -2 -13    6.50    3.50
  -1   2  13    4.10    1.30
   0  -2 -13    2.60    3.20
   0   2  13    2.90    2.80
   0   2  13   -0.10    2.30
  -1  -2 -13   12.30    5.20
   1   2  13    8.70    4.10
   1   2  13   16.90    4.60
  -2  -2 -13  188.88   13.90
   2   2  13  167.58   14.20
  -3  -2 -13    2.10    4.40
  -3  -2 -13    5.70    4.00
   6  -3 -13   38.20    6.20
  -6   3  13   26.30    7.60
   5  -3 -13   41.80    7.20
  -5   3  13   28.70    8.30
   4  -3 -13   61.99    8.60
   3  -3 -13    7.10    3.30
   2  -3 -13   97.19   10.10
   1  -3 -13  189.38   14.30
   0  -3 -13   10.50    4.10
   0   3  13    1.60    2.70
   0   3  13    3.50    3.30
  -1  -3 -13   20.90    6.20
  -1  -3 -13   13.60    3.90
   1   3  13    7.40    4.80
  -2  -3 -13   34.30    7.40
   2   3  13   24.10    8.80
  -3  -3 -13   26.50    6.60
  -3  -3 -13   27.40    7.60
   6  -4 -13    3.30    3.40
   5  -4 -13   39.30    6.80
   4  -4 -13    6.00    4.10
   3  -4 -13  145.19   12.50
   2  -4 -13   10.40    4.50
   1  -4 -13   21.20    5.60
   0  -4 -13   69.79   10.20
   0   4  13   71.89    7.70
  -1  -4 -13   -1.10    3.30
  -1  -4 -13    0.90    2.40
   1   4  13   -2.20    4.90
  -2  -4 -13  101.39   10.40
  -2  -4 -13  121.09   12.50
   5  -5 -13   12.60    4.40
   4  -5 -13   92.09   10.30
   3  -5 -13  109.49   11.30
   2  -5 -13   -0.90    3.10
   1  -5 -13   -1.00    3.80
   0  -5 -13   63.29    9.90
   0  -5 -13   76.39    6.50
   0   5  13   65.49   10.90
  -1  -5 -13   41.60    7.60
  -1  -5 -13   48.10    6.50
   1   5  13   51.89    9.40
   4  -6 -13   67.99   10.10
   3  -6 -13   26.70    6.30
   2  -6 -13    3.10    4.00
   1  -6 -13   24.90    6.30
   0  -6 -13    4.90    3.60
   0  -6 -13    0.70    2.50
   0   6  13   -4.50    6.80
   2   9 -14   10.10    4.50
  -2  -9  14  -12.50    6.10
   1   9 -14    1.20    4.80
  -1  -9  14   -2.30    6.70
   0   9 -14    4.60    5.40
   0  -9  14   -8.40    4.70
   4   8 -14  141.19   11.90
  -4  -8  14  137.99   16.50
  -4  -8  14  139.69   13.20
   3   8 -14    1.30    3.10
  -3  -8  14   -6.60    6.20
  -3  -8  14   -4.10    3.90
   2   8 -14   58.59    9.50
  -2  -8  14   52.29   12.00
   1   8 -14   23.90    6.90
  -1  -8  14   42.90   10.20
   0   8 -14    0.10    4.00
   0  -8  14    2.10    5.20
  -1   8 -14   80.19   12.10
   1  -8  14   61.69   11.90
   5   7 -14   14.40    4.30
  -5  -7  14   17.20    5.50
  -5  -7  14   12.30    7.50
   4   7 -14   15.50    3.70
  -4  -7  14   -0.10    3.80
  -4  -7  14    3.70    4.90
   3   7 -14    2.40    3.70
  -3  -7  14   -0.10    5.60
  -3  -7  14    4.90    4.00
   2   7 -14   12.70    5.00
  -2  -7  14   17.70    8.50
   1   7 -14   99.99   11.00
  -1  -7  14  102.49   13.70
   0   7 -14   -3.10    4.00
   0  -7  14    0.30    4.70
  -1   7 -14   -2.70    4.30
   1  -7  14    6.80    5.30
  -2   7 -14   50.09   10.50
   2  -7  14   41.40   10.60
   5   6 -14   20.30    4.20
   5   6 -14   36.30    7.20
  -5  -6  14   15.50    6.90
  -5  -6  14   16.90    4.50
   4   6 -14   -1.30    3.00
   4   6 -14    2.00    3.50
  -4  -6  14   -1.50    3.90
  -4  -6  14   -3.30    3.30
   3   6 -14   75.49   10.10
   3   6 -14   89.69    9.10
  -3  -6  14   75.69    8.60
  -3  -6  14   88.09   11.60
   2   6 -14    7.60    5.00
   2   6 -14   17.20    4.80
  -2  -6  14   19.50    6.80
  -2  -6  14   13.50    5.10
   1   6 -14    1.10    3.40
  -1  -6  14   -0.20    4.20
  -1  -6  14   -0.40    3.20
   0   6 -14    4.80    4.10
   0  -6  14   -2.50    3.30
   0  -6  14    7.20    5.30
  -1   6 -14   40.20    8.30
   1  -6  14   42.40    9.50
  -2   6 -14   12.90    5.40
   2  -6  14    9.30    5.80
   3  -6  14   11.40    6.80
  -6  -5  14   -1.50    3.40
  -6  -5  14   -7.10    3.60
   5   5 -14   43.20    6.00
   5   5 -14   37.30    7.50
  -5  -5  14   39.60    6.20
  -5  -5  14   38.00    7.60
   4   5 -14   20.10    5.50
   4   5 -14   19.40    4.60
  -4  -5  14   21.30    4.50
  -4  -5  14   15.90    6.10
   3   5 -14   44.60    7.70
   3   5 -14   57.09    8.40
  -3  -5  14   52.19    8.80
  -3  -5  14   31.20    7.70
   2   5 -14    8.30    3.70
   2   5 -14    8.30    3.50
  -2  -5  14   -2.40    4.00
  -2  -5  14   12.30    4.30
   1   5 -14    7.20    4.30
  -1  -5  14    3.10    4.30
  -1  -5  14   13.80    5.30
   0   5 -14   42.90    8.60
   0  -5  14   49.90    8.20
   0  -5  14   42.30    8.50
  -1   5 -14    2.30    4.00
   1  -5  14    0.70    3.90
   1  -5  14    1.10    3.20
  -2   5 -14   21.70    6.60
   2  -5  14   11.00    6.80
  -3   5 -14   17.50    6.30
   3  -5  14    3.50    5.80
  -6  -4  14   -3.80    3.70
  -6  -4  14   -4.00    3.10
   5   4 -14   25.20    5.50
   5   4 -14   36.00    5.50
  -5  -4  14   27.20    5.70
  -5  -4  14   27.40    4.70
   4   4 -14   33.10    6.30
   4   4 -14   40.80    6.40
  -4  -4  14   42.80    7.60
  -4  -4  14   49.80    7.00
   3   4 -14    4.50    3.20
   3   4 -14    2.80    3.10
  -3  -4  14    5.60    4.00
   2   4 -14   15.30    4.70
  -2  -4  14   17.70    5.20
  -2  -4  14   21.60    5.20
  -2  -4  14   12.30    5.20
   1   4 -14  141.39   12.00
  -1  -4  14  133.79   12.30
  -1  -4  14  129.29   11.20
   0   4 -14    7.80    4.20
   0  -4  14    3.40    3.00
   0  -4  14   -0.30    3.90
  -1   4 -14  328.37   21.10
   1  -4  14  312.47   19.90
   1  -4  14  318.77   21.50
   2  -4  14   28.80    7.80
  -3   4 -14   12.70    5.90
   3  -4  14   13.90    7.40
   6   3 -14   28.50    4.00
   6   3 -14   15.20    4.20
  -6  -3  14   28.20    5.20
   5   3 -14   16.30    3.60
  -5  -3  14   10.70    4.00
  -5  -3  14   19.60    4.50
   4   3 -14    1.90    2.90
   4   3 -14    5.70    3.90
  -4  -3  14    5.50    2.70
  -4  -3  14    0.40    3.00
   3   3 -14   24.00    5.90
  -3  -3  14   13.90    4.50
  -3  -3  14   21.10    4.00
   2   3 -14    4.20    3.20
  -2  -3  14    7.00    3.20
  -2  -3  14    0.60    3.50
  -2  -3  14    7.40    3.00
   1   3 -14  315.57   19.20
  -1  -3  14  298.27   16.80
  -1  -3  14  300.37   18.10
   0   3 -14    1.30    3.00
   0  -3  14    1.30    3.70
   0  -3  14    1.50    2.60
  -1   3 -14   23.10    6.50
   1  -3  14   48.00    7.90
   1  -3  14   38.70    9.20
  -2   3 -14    4.50    4.70
   2  -3  14   11.90    5.40
  -3   3 -14   44.30    9.50
   3  -3  14   28.50    8.60
   6   2 -14   -2.80    1.90
   6   2 -14    0.10    2.20
  -6  -2  14   -5.70    3.10
   5   2 -14   23.60    3.70
   5   2 -14   24.00    5.00
  -5  -2  14   20.00    3.10
  -5  -2  14   21.70    4.80
   4   2 -14    2.10    3.10
  -4  -2  14    9.80    2.20
  -4  -2  14   10.70    2.40
  -4  -2  14   11.00    3.90
   3   2 -14    4.80    3.00
  -3  -2  14    6.00    2.10
  -3  -2  14    5.80    2.70
  -3  -2  14    2.60    2.90
   2   2 -14    0.70    2.50
  -2  -2  14    3.70    2.30
  -2  -2  14    3.90    3.30
   1   2 -14  301.67   18.50
  -1  -2  14  294.97   16.90
   0   2 -14  139.39   12.50
   0  -2  14  136.89   11.40
   0  -2  14  143.79   10.90
  -1   2 -14  234.78   17.10
   1  -2  14  214.38   16.30
   1  -2  14  224.58   15.40
  -2   2 -14   46.30    9.90
   2  -2  14   42.90    8.50
   2  -2  14   38.90    7.60
  -3   2 -14   71.69   11.50
   3  -2  14   90.39   11.90
   6   1 -14    6.90    2.90
  -6  -1  14    3.80    3.90
   5   1 -14   58.89    6.50
  -5  -1  14   52.99    7.30
   4   1 -14   41.00    7.90
  -4  -1  14   21.20    5.50
   3   1 -14  105.99    9.30
  -3  -1  14   84.89    9.00
   2   1 -14    0.50    2.20
  -2  -1  14   -1.60    1.80
  -2  -1  14    1.20    1.50
  -2  -1  14   -3.70    2.70
   1   1 -14   86.29    8.90
  -1  -1  14   69.89    7.10
  -1  -1  14   79.09    6.50
   0   1 -14    9.00    3.80
   0  -1  14   19.20    4.20
   0  -1  14   10.80    4.00
  -1   1 -14  137.79   12.80
   1  -1  14  138.39   11.20
   1  -1  14  138.19   12.30
   2  -1  14  224.98   17.50
   2  -1  14  253.07   17.00
  -3   1 -14    0.20    3.00
   6   0 -14    6.50    3.00
  -6   0  14   -3.80    4.10
   5   0 -14    2.80    2.20
  -5   0  14    3.00    4.00
   4   0 -14  153.58   11.20
  -4   0  14  157.48   12.00
   3   0 -14    6.70    3.00
  -3   0  14   -2.10    3.20
   2   0 -14    3.30    3.10
   1   0 -14    8.70    3.70
  -1   0  14    7.50    2.50
  -1   0  14    5.10    2.60
   0   0 -14    5.80    3.00
   0   0  14    5.00    4.50
   0   0  14   -1.90    2.80
  -1   0 -14  162.38   14.10
   1   0  14  157.78   12.80
   1   0  14  157.58   12.10
  -2   0 -14    6.40    4.50
   2   0  14    4.10    4.20
   2   0  14    3.80    4.50
  -3   0 -14   -6.00    4.00
   3   0  14   -0.70    4.70
   6  -1 -14   25.90    7.70
  -6   1  14   14.20    6.70
   5  -1 -14   68.19    7.50
  -5   1  14   54.39    7.40
   4  -1 -14   34.70    6.30
  -4   1  14   27.00    6.60
   3  -1 -14   63.79    7.40
   2  -1 -14    6.10    3.10
   1  -1 -14    2.00    4.20
  -1   1  14   12.50    2.70
  -1   1  14   15.10    2.50
   0  -1 -14   39.10    7.50
   0   1  14   28.30    4.90
   0   1  14   23.00    4.70
  -1  -1 -14   35.10    7.50
   1   1  14   44.00    7.20
   1   1  14   38.80    7.20
  -2  -1 -14  239.18   18.00
   2   1  14  245.58   17.50
   2   1  14  247.48   17.70
   3   1  14   50.69   10.70
   6  -2 -14   23.10    4.40
  -6   2  14    5.50    5.40
   5  -2 -14    2.90    2.20
  -5   2  14   -2.50    5.20
   4  -2 -14  146.29   11.50
   3  -2 -14    2.90    2.70
   2  -2 -14    1.80    3.10
   1  -2 -14   71.99   10.20
   0  -2 -14   35.60    7.70
   0   2  14   32.70    6.00
   0   2  14   34.10    5.30
  -1  -2 -14   24.10    6.20
   1   2  14   19.10    5.00
   1   2  14   15.10    5.70
  -2  -2 -14    1.60    4.60
   2   2  14   -4.80    3.40
   2   2  14    2.70    5.70
   6  -3 -14    7.00    3.60
   5  -3 -14   18.70    5.60
   4  -3 -14    1.30    3.80
   3  -3 -14    1.90    3.00
   2  -3 -14    9.80    4.20
   1  -3 -14   81.49   11.00
   0  -3 -14   -0.40    4.40
   0   3  14   -0.60    3.90
   0   3  14   -1.50    3.70
  -1  -3 -14  113.69   11.60
   1   3  14  112.09   10.50
   1   3  14   82.09   10.50
  -2  -3 -14   22.40    5.80
   2   3  14   -0.80    7.10
   5  -4 -14   13.90    5.80
   4  -4 -14    3.50    3.80
   3  -4 -14   17.10    5.40
   2  -4 -14   13.30    5.80
   1  -4 -14    0.80    3.60
   0  -4 -14   -0.10    3.70
   0   4  14    7.10    5.80
   0   4  14    0.10    4.20
  -1  -4 -14    0.40    2.90
  -1  -4 -14    0.60    4.50
   1   4  14   14.30    7.60
   4  -5 -14  105.49   11.50
   3  -5 -14    5.70    4.70
   2  -5 -14    8.60    5.00
   1  -5 -14    0.90    4.60
   0   5  14   -7.80    5.60
   2   8 -15   31.20    7.60
  -2  -8  15   27.20   10.10
   1   8 -15   33.40    8.00
  -1  -8  15   36.80   10.10
   0   8 -15   18.80    6.30
   0  -8  15    9.20    7.10
   4   7 -15    4.40    4.00
  -4  -7  15   18.60    7.50
  -4  -7  15    8.80    5.60
   3   7 -15   -4.40    3.30
  -3  -7  15    4.00    5.60
   2   7 -15    1.50    4.00
  -2  -7  15   -9.60    4.20
   1   7 -15    5.30    4.40
  -1  -7  15   -5.20    4.60
   0   7 -15   58.79   10.80
   0  -7  15   61.39   12.20
  -1   7 -15    0.20    4.40
   1  -7  15   -2.50    4.90
   4   6 -15   14.10    5.70
   4   6 -15   23.70    5.70
  -4  -6  15   15.10    5.70
  -4  -6  15   28.10    7.50
   3   6 -15   64.89    8.40
   3   6 -15   41.70    7.80
  -3  -6  15   54.79   10.20
  -3  -6  15   44.70    9.40
   2   6 -15   -3.30    3.20
  -2  -6  15   -5.80    3.30
  -2  -6  15   -6.90    4.30
   1   6 -15   41.70    8.20
  -1  -6  15   33.00    8.60
  -1  -6  15   31.80    8.00
   0   6 -15   -5.20    3.70
   0  -6  15    5.80    5.50
  -1   6 -15   -3.60    4.20
   1  -6  15   -2.10    5.30
   2  -6  15   25.10    7.90
   5   5 -15   33.60    5.80
   5   5 -15   25.00    6.30
  -5  -5  15   38.70    6.60
  -5  -5  15   23.10    6.60
   4   5 -15   22.50    5.00
   4   5 -15   18.90    4.60
  -4  -5  15   13.30    6.00
  -4  -5  15   15.00    6.60
   3   5 -15    5.60    4.10
   3   5 -15    6.20    3.70
  -3  -5  15   -1.00    4.00
  -3  -5  15    7.40    5.40
   2   5 -15    2.30    3.50
  -2  -5  15    7.00    4.00
  -2  -5  15   -1.80    4.40
   1   5 -15    4.00    4.10
  -1  -5  15   -2.40    4.50
   0   5 -15   33.00    7.40
   0  -5  15   29.30    6.80
   0  -5  15   21.80    6.70
  -1   5 -15   37.40    8.20
   1  -5  15   27.80    8.10
  -2   5 -15   73.49   11.50
   2  -5  15   68.09   12.00
   5   4 -15   -6.70    2.60
   5   4 -15   -5.00    2.70
  -5  -4  15   -5.10    3.40
   4   4 -15   22.40    4.60
   4   4 -15   36.10    6.30
  -4  -4  15   22.20    6.00
  -4  -4  15   20.90    6.10
   3   4 -15   17.50    5.30
  -3  -4  15   11.80    4.90
  -3  -4  15   12.40    3.90
  -3  -4  15   15.70    5.40
   2   4 -15  146.19   12.50
  -2  -4  15  127.09   12.40
  -2  -4  15  136.89   10.90
   1   4 -15   31.80    6.90
  -1  -4  15   27.30    7.30
  -1  -4  15   34.30    6.50
   0   4 -15   17.30    5.70
   0  -4  15   14.10    6.70
   0  -4  15    5.00    4.50
  -1   4 -15   21.70    8.10
   1  -4  15   28.20    7.00
   1  -4  15   26.70    7.50
  -2   4 -15   10.70    5.90
   2  -4  15   17.50    7.20
   6   3 -15   34.00    4.90
  -6  -3  15   36.60    5.90
  -6  -3  15   32.90    7.00
   5   3 -15   32.00    4.20
   5   3 -15   28.70    5.60
  -5  -3  15   23.70    4.50
  -5  -3  15   27.60    5.50
   4   3 -15    4.50    3.00
  -4  -3  15    6.30    3.10
  -4  -3  15    2.60    3.10
  -4  -3  15   -1.90    2.70
   3   3 -15   -3.30    2.20
  -3  -3  15   -4.30    2.90
  -3  -3  15   -3.10    2.20
   2   3 -15    4.50    3.70
  -2  -3  15   12.80    4.50
  -2  -3  15   15.40    3.70
   1   3 -15   28.90    6.90
  -1  -3  15   17.50    5.70
  -1  -3  15   29.40    5.80
   0   3 -15   64.49   10.20
   0  -3  15   52.79    9.30
   0  -3  15   62.39    7.80
   1  -3  15   -0.20    3.70
   1  -3  15    2.00    4.30
  -2   3 -15    8.70    4.80
   2  -3  15   -4.60    4.70
   6   2 -15   30.30    5.40
  -6  -2  15   30.70    3.50
  -6  -2  15   30.50    6.80
   5   2 -15   16.50    4.40
  -5  -2  15   14.50    2.70
  -5  -2  15   16.30    4.80
   4   2 -15   -2.60    1.70
  -4  -2  15   -1.70    1.00
  -4  -2  15    1.00    2.10
   3   2 -15   20.30    4.90
  -3  -2  15   25.10    3.50
  -3  -2  15   12.70    2.80
  -3  -2  15   15.80    5.00
   2   2 -15  190.28   14.40
  -2  -2  15  195.58   10.80
   1   2 -15    1.40    3.80
  -1  -2  15    4.50    3.40
  -1  -2  15    7.30    2.90
   0   2 -15   36.20    7.00
   0  -2  15   53.49    6.90
   0  -2  15   44.50    7.80
  -1   2 -15   55.99   11.40
   1  -2  15   73.59   11.20
   1  -2  15   81.09    9.30
  -2   2 -15    0.50    4.70
   2  -2  15   -6.00    3.70
   6   1 -15   -3.80    3.50
  -6  -1  15    1.10    4.90
   5   1 -15  114.99    9.80
  -5  -1  15  108.39   12.10
   4   1 -15   35.20    6.30
  -4  -1  15   25.90    6.00
   3   1 -15    9.60    3.60
   2   1 -15  123.39   11.10
  -2  -1  15  115.39    6.00
  -2  -1  15   88.59    5.90
   1   1 -15    7.50    4.20
  -1  -1  15    7.20    2.80
  -1  -1  15   -0.50    2.80
   0   1 -15   13.30    5.60
   0  -1  15   16.10    4.30
   0  -1  15    7.90    3.80
  -1   1 -15   15.80    5.60
   1  -1  15   17.70    5.30
   1  -1  15   20.10    6.40
  -2   1 -15   28.00    7.40
   2  -1  15   34.50    8.70
   2  -1  15   42.30    8.60
   5   0 -15   11.40    4.10
  -5   0  15    0.90    4.70
   4   0 -15    1.20    3.30
   3   0 -15   38.20    6.50
   2   0 -15    4.30    4.10
   1   0 -15   51.59    8.80
  -1   0  15   34.50    4.80
  -1   0  15   51.89    4.90
   0   0 -15   25.80    6.20
   0   0  15   45.70    6.10
   0   0  15   22.30    5.30
  -1   0 -15   61.79   10.00
   1   0  15   97.99   10.30
   1   0  15   95.19    9.80
  -2   0 -15    7.30    4.60
   2   0  15    8.90    5.70
   2   0  15    3.40    5.20
   5  -1 -15   30.00    6.10
   4  -1 -15   34.20    6.60
   3  -1 -15   -0.20    3.30
   2  -1 -15   -2.50    1.70
   1  -1 -15    1.40    2.90
   0  -1 -15  127.49   14.30
   0   1  15  110.19    9.30
  -1  -1 -15   19.70    6.40
   1   1  15   18.40    5.00
   1   1  15    6.80    5.00
   2   1  15   44.80   10.10
   2   1  15   30.90    8.10
   5  -2 -15   63.49    9.20
   4  -2 -15   37.60    7.20
   3  -2 -15   -1.40    3.00
   2  -2 -15   53.59    8.90
   0  -2 -15    7.60    4.50
   0   2  15   -4.10    4.00
   0   2  15   -3.80    3.00
  -1  -2 -15   15.50    5.10
   1   2  15    6.70    5.10
   1   2  15    4.90    7.20
   4  -3 -15    8.30    3.90
   3  -3 -15    0.30    3.10
   2  -3 -15   12.10    6.50
   1  -3 -15    0.00    4.10
   0  -3 -15    1.00    2.80
   0   3  15   -0.30    4.60
   3  -4 -15  205.38   16.00
   2  -4 -15   19.40    5.50
   1  -4 -15   19.30    6.40
   3   6 -16  153.78   13.00
  -3  -6  16  115.49   13.60
   2   6 -16    0.40    4.60
  -2  -6  16   -3.40    5.60
  -2  -6  16   -1.80    5.00
   1   6 -16   16.80    7.50
  -1  -6  16   10.50    7.30
   0   6 -16    6.60    5.50
   0  -6  16    9.10    6.10
   4   5 -16   25.60    5.60
   4   5 -16   25.60    5.60
  -4  -5  16   14.90    6.50
  -4  -5  16   16.00    5.90
   3   5 -16    4.10    3.90
  -3  -5  16   13.50    5.90
  -3  -5  16   13.00    4.60
   2   5 -16    8.50    5.00
  -2  -5  16   -7.20    3.90
  -2  -5  16   -8.30    5.00
   1   5 -16   25.90    6.20
  -1  -5  16   32.90    7.50
  -1  -5  16   38.00    8.20
   0   5 -16  125.59   12.80
   0  -5  16  120.89   14.10
   0  -5  16  121.79   18.00
  -1   5 -16    1.40    3.70
   1  -5  16   -4.80    5.70
   4   4 -16    5.10    3.70
  -4  -4  16    0.50    4.00
  -4  -4  16   -1.10    4.50
  -4  -4  16   -3.60    4.10
   3   4 -16   24.00    6.20
  -3  -4  16    8.60    4.90
  -3  -4  16   21.70    5.10
   2   4 -16    4.60    4.70
  -2  -4  16   10.80    4.60
  -2  -4  16    1.00    4.50
   1   4 -16  121.99   12.00
  -1  -4  16  100.29   10.40
  -1  -4  16   89.59   11.00
   0   4 -16  110.79   12.30
   0  -4  16   97.39   11.40
   0  -4  16  114.29   11.30
  -1   4 -16    7.30    5.90
   1  -4  16   -4.30    4.90
   5   3 -16   25.10    5.30
  -5  -3  16    2.80    5.80
   4   3 -16   22.70    5.70
  -4  -3  16   25.80    4.20
  -4  -3  16   31.30    7.90
   3   3 -16   -0.90    3.70
  -3  -3  16    3.10    3.10
  -3  -3  16   -6.00    2.90
   2   3 -16   69.89   10.30
  -2  -3  16   61.49    8.90
  -2  -3  16   73.29    7.30
   1   3 -16   31.50    7.30
  -1  -3  16   32.30    7.00
  -1  -3  16   36.60    6.70
   0   3 -16    5.10    4.40
   0  -3  16    4.70    4.50
  -1   3 -16   81.39   12.50
   1  -3  16   94.79   11.10
   1  -3  16   69.89   11.40
   5   2 -16   20.70    5.70
  -5  -2  16   11.60    6.10
   4   2 -16   36.90    7.10
   3   2 -16   31.20    7.30
  -3  -2  16   24.40    3.70
  -3  -2  16   14.90    2.20
   2   2 -16    8.70    4.90
  -2  -2  16    8.50    3.20
   1   2 -16    2.20    3.70
  -1  -2  16    0.80    3.20
  -1  -2  16    0.70    3.90
   0   2 -16    8.20    5.50
   0  -2  16   -1.60    4.10
   0  -2  16   -1.60    3.50
  -1   2 -16    1.90    5.10
   1  -2  16    5.50    5.80
   1  -2  16    5.00    4.70
   5   1 -16    1.30    2.90
  -5  -1  16   -0.40    4.70
   4   1 -16   -3.70    3.00
   3   1 -16   26.40    6.00
   2   1 -16   28.20    6.90
   1   1 -16   -2.70    3.30
  -1  -1  16   -8.00    3.80
  -1  -1  16   -2.60    2.70
   0   1 -16  195.88   16.40
   0  -1  16  216.18   14.00
   0  -1  16  194.98   14.40
  -1   1 -16   -2.50    2.80
   1  -1  16   -1.20    5.10
   1  -1  16   -1.00    4.70
   5   0 -16   20.80    4.80
   4   0 -16   16.90    5.20
   3   0 -16   51.89    8.50
   2   0 -16    7.20    4.10
   1   0 -16   24.70    7.20
  -1   0  16   19.10    3.60
  -1   0  16   15.60    3.60
   0   0 -16   59.79   10.20
   0   0  16   85.29    8.80
   0   0  16   71.59    8.50
   1   0  16   87.09   10.90
   1   0  16   81.39   11.10
   4  -1 -16   11.80    4.80
   3  -1 -16   16.20    5.50
   1  -1 -16   14.70    5.10
   0  -1 -16   41.40    9.00
   0   1  16   36.30    5.80
   2  -2 -16    3.80    4.30
   1  -2 -16   -1.10    4.00
   2   4 -17   50.39   10.00
  -2  -4  17   65.29    9.30
  -2  -4  17   50.19    9.10
   1   4 -17   81.39   11.90
  -1  -4  17   63.59   10.70
  -1  -4  17   63.99    9.80
   3   3 -17   34.10    7.20
  -3  -3  17   36.70    8.80
   2   3 -17    5.20    4.70
  -2  -3  17    4.20    4.50
  -2  -3  17    6.30    5.30
   1   3 -17   44.60    8.30
  -1  -3  17   46.90    7.90
  -1  -3  17   50.39    8.70
   3   2 -17   -1.70    3.70
  -2  -2  17    3.90    3.50
  -2  -2  17   13.40    4.70
   1   2 -17    8.80    5.00
  -1  -2  17    8.10    5.60
  -1  -2  17   10.80    4.90
   3   1 -17   -7.60    3.20
   2   1 -17    0.10    4.10
   1   1 -17   14.00    5.70
  -1  -1  17    9.60    6.00
   2   0 -17   48.60    9.00
   0   0   0    0.00    0.00

_computing_structure_solution     'SHELXT 2014/5 (Sheldrick, 2014)'
;
_shelx_hkl_checksum   97091
